# Supplementary material
Source: publisher figshare collection journal article supplement (https://karger.figshare.com/ndownloader/files/8879482)
Supplement: Supplementary file 1 [file 8879482]

## Sheet: TCF4_KD_diff_8330_FC1.3_p05
Symbol	ProbeID	p (Corr)	Regulation	fold change	[RFP control line 5](normalized)	[TCF4 KD line 3](normalized)	Entrez_Gene_ID	Definition	Ontology_Process	Ontology_Component	Ontology_Function	Chromosome	Chromosome Start Index(Avadis)	Chromosome End Index(Avadis)	Probe_Sequence
TRIM48	5290056	0.00768846	down	-15.0104	5.57807	1.67018	79097	Homo sapiens tripartite motif-containing 48 (TRIM48), mRNA.		GO:0005622	GO:0005515|GO:0008270|GO:0046872	chr11	54794809	54794858	ACCTCCCCAATTACACTGCAGTATGTCCCAAGACCTACCAACCATGTAGA
LOC440040	6330609	0.00768846	down	-11.4644	4.644	1.12492	440040	PREDICTED: Homo sapiens similar to hCG2039930 (LOC440040), mRNA.				chr11	49788382	49788431	CAGAAATGTGTTTATCTGCTGTGGGAACCCCTTTATCCCATAAAGCCCTC
TRIM49C	430750	0.00794934	down	-9.54248	4.17081	0.916446	100134006	PREDICTED: Homo sapiens similar to ring finger protein 18, transcript variant 1 (LOC100134006), mRNA.							GGTGACCTCTGAAACTCAGTACTGCGGCGAATGAGCTCCTGACCTTGAGG
TRIM49D2	60497	0.00768846	down	-9.50402	4.25012	1.00159	729384	Homo sapiens tripartite motif protein 49-like (LOC729384), mRNA.				chr11	89299584	89299633	TCTGGAATCTCGCAAGTCTTCCAGAGGGAACTCACCTGCCCCATCTGCCT
LOC642362	1710139	0.00934063	down	-8.00947	3.72805	0.726341	642362	PREDICTED: Homo sapiens similar to tripartite motif protein 39 (LOC642362), mRNA.				chr11	89141061	89142516	CTCACAGATGAGTGAGTCCGTGCTGCTGCACATGCCCCAGCCTGTGAATC
LOC653111	3890324	0.00851102	down	-7.86307	3.67658	0.701489	653111	PREDICTED: Homo sapiens similar to ring finger protein 18 (LOC653111), mRNA.				chr11	89413994	89414043	TGCATGGGGTGTTCAGACTTTCACCTCGGGCAAATATTACTGGGAGGTCC
TRIM49D1	430626	0.00768846	down	-7.78517	3.6	0.639276	399939	PREDICTED: Homo sapiens similar to ring finger protein 18 (LOC399939), mRNA.				chr11	89293168	89293217	CTCTGAAACTCAGTACTGCGGCGAATGAGCTCCTGACCTTGAGGAGTACT
SPRYD5	4880204	0.00764478	down	-5.68977	2.77167	0.263299	84767	Homo sapiens SPRY domain containing 5 (SPRYD5), mRNA.				chr11	55415610	55415659	TCCCTGATATACACCATCCCCAATTGCTCCTTCTCACCTCCTCTCAGGCC
BHLHE22	7210551	0.0212962	down	-4.57115	5.22479	3.03223	27319	Homo sapiens basic helix-loop-helix family, member e22 (BHLHE22), mRNA.				chr8	65495888	65495937	GTGAGCTTTCAGTTTTAGTTTTGCATGGCTGTTTGACTGCCTTTCCGCCC
NEUROG2	7610746	0.0278124	down	-3.61714	5.59332	3.73847	63973	Homo sapiens neurogenin 2 (NEUROG2), mRNA.	GO:0001764|GO:0006355|GO:0007275|GO:0007399|GO:0007411|GO:0030182|GO:0030900|GO:0045165|GO:0045944	GO:0005634	GO:0003677|GO:0005515|GO:0030528	chr4	113654267	113654316	AACCTAAGCAGACACGGAGCATTATCCGGATCAGCCACACACGTGTTCCC
ROBO3	5860717	0.0153913	down	-3.61098	2.22329	0.370904	64221	Homo sapiens roundabout, axon guidance receptor, homolog 3 (Drosophila) (ROBO3), mRNA.	GO:0006935|GO:0007275|GO:0007399|GO:0007411|GO:0030154	GO:0016020|GO:0016021	GO:0004872	chr11	124255690	124256369	AAGGCCAGGACAGAAACGCCGAGAGGAACCAAGATGACCCTTGTTGGGGC
ATP1A2	3990092	0.00768846	down	-3.57399	3.8213	1.98377	477	Homo sapiens ATPase, Na+/K+ transporting, alpha 2 (+) polypeptide (ATP1A2), mRNA.	GO:0006813|GO:0008152|GO:0006813|GO:0006814|GO:0006942|GO:0008152|GO:0030317|GO:0030641	GO:0016020|GO:0016021|GO:0005737|GO:0005886|GO:0005890|GO:0016021	GO:0000166|GO:0005524|GO:0015077|GO:0015662|GO:0016787|GO:0016820|GO:0030955|GO:0000166|GO:0000287|GO:0005391|GO:0005524|GO:0015077|GO:0016787|GO:0016820|GO:0030955|GO:0031402	chr1	158379422	158379471	CCTGGCTTAGAAGGCACTGGGAATGTCCTGTAGAGAGAGACCTAGATAGG
TRIM53	460343	0.00768846	down	-3.56593	2.09265	0.258368	642569	PREDICTED: Homo sapiens misc_RNA (TRIM53), miscRNA.							CTCTACCTTCTACCTTCTCCAGGAACTTATGGTGGGCAAATGGGTGACTC
LOC650757	4900192	0.00768846	down	-3.33386	4.2702	2.53301	650757	PREDICTED: Homo sapiens hypothetical protein LOC650757 (LOC650757), mRNA.							ATGGGAGGCGTGGAGCGAGAAAATCAGGAAGCGCGGGACCAAGCCGGGGA
HES5	6590300	0.0153898	down	-3.18695	7.25789	5.58572	388585	Homo sapiens hairy and enhancer of split 5 (Drosophila) (HES5), mRNA.	GO:0006355|GO:0006355|GO:0007155|GO:0007275|GO:0007399|GO:0030154|GO:0042491|GO:0042668|GO:0045665|GO:0048469	GO:0005634|GO:0005634	GO:0003677|GO:0030528|GO:0003677|GO:0030528	chr1	2450120	2450169	GGATTCCTCTGTGTGGGTGGATGCGTGTGGGCACGACTTTGTACTCAGAA
KAL1	6620008	0.0418277	down	-3.14236	4.80849	3.15665	3730	Homo sapiens Kallmann syndrome 1 sequence (KAL1), mRNA.	GO:0006928|GO:0006935|GO:0007155|GO:0007155|GO:0007411	GO:0005576|GO:0005578|GO:0005615|GO:0009986	GO:0004867|GO:0005201|GO:0005515	chrX	8498485	8498534	GTGTCAGGTACGGAGAGGATTCTCATGACTGTCTTACCTCTACTGAATAT
LMO1	6980543	0.0120172	down	-3.13498	2.93334	1.28489	4004	Homo sapiens LIM domain only 1 (rhombotin 1) (LMO1), mRNA.	GO:0007275|GO:0008283	GO:0005634	GO:0008270|GO:0046872|GO:0008270|GO:0046872|GO:0003700|GO:0008270|GO:0046872	chr11	8246018	8246067	CAGCCGCTCTCCTGCCACATTAGAACTTCTCCGTCCTCGATGGGAGGGAT
KCNK4	2940747	0.00768846	down	-3.05753	2.73958	1.12721	50801	Homo sapiens potassium channel, subfamily K, member 4 (KCNK4), mRNA.	GO:0006811|GO:0006813	GO:0016020|GO:0016021	GO:0005244|GO:0005267|GO:0030955	chr11	63823985	63824034	CGGGTGTATCCCTCACAGCACCTCACGACTGTGCCTCAAAGCCTGCATCA
CD200R1	4050348	0.00764478	down	-2.79965	2.592	1.10676	131450	Homo sapiens CD200 receptor 1 (CD200R1), transcript variant 1, mRNA.	GO:0044419	GO:0005576|GO:0005886|GO:0016021	GO:0004872	chr3	114176433	114176482	CCAGAGAGGGTCTCACCATGCGCACAGTTCCTTCTGTACCTGTGTGGAGG
CYP26B1	6280224	0.0393789	down	-2.69644	0.98814	-0.442913	56603	Homo sapiens cytochrome P450, family 26, subfamily B, polypeptide 1 (CYP26B1), mRNA.	GO:0001709|GO:0007140|GO:0007283|GO:0009954|GO:0030326|GO:0034653|GO:0048387|GO:0055114	GO:0005783|GO:0005789|GO:0005792|GO:0016020	GO:0001972|GO:0005506|GO:0008401|GO:0009055|GO:0020037|GO:0046872	chr2	72356794	72356843	AGCACTTTCGATGTTGGGCGCTGGCGTTTGTGTTCTGGGCACCACCGTGA
ENTPD8	6940068	0.0107609	down	-2.6943	1.56115	0.131234	377841	Homo sapiens ectonucleoside triphosphate diphosphohydrolase 8 (ENTPD8), transcript variant 1, mRNA.		GO:0005886|GO:0016021	GO:0000166|GO:0005509|GO:0005524|GO:0016787	chr9	140330186	140330235	TCCAGGCAGCCCCTGAGCACGGTCAACGCCACCATCTGGGAGTTTTGCCA
LRRC45	3420440	0.00768846	down	-2.68255	2.83257	1.40896	201255	Homo sapiens leucine rich repeat containing 45 (LRRC45), mRNA.			GO:0005515	chr17	77581628	77581819	AAAGTGATGGCGAGCGACCACCGAGAGGCGCTGCTGGACAGGGAGAGCGA
EFNA1	3710397	0.0031005	down	-2.64056	2.79543	1.39459	1942	Homo sapiens ephrin-A1 (EFNA1), transcript variant 1, mRNA.	GO:0000187|GO:0007267|GO:0030182|GO:0048013|GO:0050770	GO:0005886|GO:0005887|GO:0031225	GO:0046875	chr1	153373839	153373888	CAGGGCCCACGTGTATAGTATCTGTATATAAGTTGCTGTGTGTCTGTCCT
PMP2	1690403	0.0297246	down	-2.60592	3.13257	1.75078	5375	Homo sapiens peripheral myelin protein 2 (PMP2), mRNA.	GO:0006810		GO:0005215|GO:0008289	chr8	82515289	82515338	AACCCCGCACTTGGCAACTTCTTCTCTTTTTCAGCCTAGAAATGTCTGTG
PLP1	2650288	0.0296975	down	-2.56217	2.71402	1.35665	5354	Homo sapiens proteolipid protein 1 (PLP1), transcript variant 2, mRNA.	GO:0022010|GO:0042759|GO:0048469|GO:0022010|GO:0042759|GO:0048469|GO:0022010|GO:0042759|GO:0048469|GO:0022010|GO:0042759|GO:0048469|GO:0022010|GO:0042759|GO:0048469|GO:0022010|GO:0042759|GO:0048469|GO:0007268|GO:0008366|GO:0022010|GO:0042759|GO:0048469	GO:0043209|GO:0043209|GO:0043209|GO:0043209|GO:0043209|GO:0043209|GO:0016020|GO:0016021|GO:0043209	GO:0005515|GO:0005515|GO:0005515|GO:0005515|GO:0005515|GO:0005515|GO:0005198|GO:0005515	chrX	102933862	102933911	CAAACCAGTATACAAGATAAGCTTCCAGGCTGCATAGAAGGAGGAGAGGG
MSX1	1010333	0.0140527	down	-2.54166	-3.84551	-5.19128	4487	Homo sapiens msh homeobox 1 (MSX1), mRNA.	GO:0000122|GO:0001501|GO:0001701|GO:0003007|GO:0007275|GO:0007517|GO:0008285|GO:0030326|GO:0030509|GO:0030900|GO:0030901|GO:0043066	GO:0005634	GO:0003700|GO:0005515|GO:0016564|GO:0043565	chr4	4865147	4865196	GGTCCCCAGCAGAATTGACAGTTGAACAGAGCTAGAGGCCATGTCTCCTG
LOC401056	1660138	0.00949059	down	-2.53084	2.2494	0.909783	401056	PREDICTED: Homo sapiens hypothetical LOC401056 (LOC401056), mRNA.				chr3	18485851	18485900	TGGCCTCTTTTCCCCTAGACCTCTGCCAGTCCACCAACACTCTCAGTGGG
MPG	2600189	0.0114832	down	-2.50709	1.92931	0.603299	4350	Homo sapiens N-methylpurine-DNA glycosylase (MPG), transcript variant 2, mRNA.	GO:0006284|GO:0006307|GO:0045007	GO:0005634|GO:0005654|GO:0005654|GO:0005737	GO:0003684|GO:0003905|GO:0016787|GO:0042802	chr16	75547	75596	AGGCCCTGGCCATCAACAAGAGCTTTGACCAGAGGGACCTGGCACAGGAT
C8orf4	5570731	0.00768846	down	-2.49541	0.870198	-0.449077	56892	Homo sapiens chromosome 8 open reading frame 4 (C8orf4), mRNA.	GO:0006915			chr8	40011701	40011750	GATGGCTGGAGATGACATTTATCCAGGGTCACTTTGTCAGGCCCTAGGAC
LINC02315	6290397	0.0153898	down	-2.47164	3.21458	1.90911	644919	PREDICTED: Homo sapiens hypothetical protein LOC644919 (LOC644919), mRNA.				chr14	40493876	40501762	ATCTTGGCTCCTCCGCATTTGTTTTTATGGTGGTTTTGTATTGTTTTTAT
CRYL1	3940458	0.0419708	down	-2.44598	1.3568	0.0663905	51084	Homo sapiens crystallin, lambda 1 (CRYL1), mRNA.	GO:0006631|GO:0008152		GO:0005488|GO:0016491	chr13	20978088	20978137	CCTGAGTGGGGTGGTGCAGGCCGGTAGTCTGCCCGTCACTTTGGATCATA
FLJ10916	3180719	0.00768846	down	-2.43137	-0.235672	-1.51744	55258	Homo sapiens hypothetical protein FLJ10916 (FLJ10916), mRNA.				chr2	88267171	88267220	ACCAAATCCAAAGGTTCTGGCCCACCTTGTCAGAGGCTTCCACCCTGCTC
DHRS3	7040670	0.00874808	down	-2.41664	-1.06684	-2.33984	9249	Homo sapiens dehydrogenase/reductase (SDR family) member 3 (DHRS3), mRNA.	GO:0007601|GO:0042572|GO:0055114|GO:0055114	GO:0016020|GO:0016021	GO:0000166|GO:0009055|GO:0016491|GO:0005488|GO:0016491	chr1	12628133	12628182	TGACCCCCACAGGGAGGCAGGAAAACAGCCAGAAGCCACCTTGACACTTT
MAP7	3120475	0.0126478	down	-2.38128	2.20295	0.951215	9053	Homo sapiens microtubule-associated protein 7 (MAP7), mRNA.	GO:0000226|GO:0007163	GO:0005737|GO:0005874|GO:0005875|GO:0005886|GO:0016323	GO:0005198	chr6	136706722	136706771	CTTCACTTTTGCTGCTGAGCCTAGCTGTACAAACTTGCACTTTCATTTGC
SNORD13	7210035	0.0250632	down	-2.35319	-1.02755	-2.26217	692084	Homo sapiens small nucleolar RNA, C/D box 13 (SNORD13), small nucleolar RNA.				chr8	33371010	33371059	GAGCGTGATGATTGGGTGTTCATACGCTTGTGTGAGATGTGCCACCCTTG
PPP1R3C	6580593	0.00874808	down	-2.33969	-4.03143	-5.25775	5507	Homo sapiens protein phosphatase 1, regulatory (inhibitor) subunit 3C (PPP1R3C), mRNA.	GO:0005975|GO:0005978		GO:0004722	chr10	93388548	93388597	GCAAGAATCCAGTACCTTGCACATAGAAGTAGCAACCCATCCCTTGCCTA
S100A16	110468	0.0410122	down	-2.32008	-3.63624	-4.85041	140576	Homo sapiens S100 calcium binding protein A16 (S100A16), mRNA.			GO:0005509	chr1	153579715	153579764	GCTGTCTGGGGACCCTAAGAGTTTTCTCACCTGTTCAGTCTCATCTAACC
NKD1	5570025	0.00768846	down	-2.31283	1.96527	0.75561	85407	Homo sapiens naked cuticle homolog 1 (Drosophila) (NKD1), mRNA.	GO:0016055	GO:0005737|GO:0005886	GO:0004462|GO:0005509|GO:0005515|GO:0005515	chr16	49225787	49225836	GGGATCAAGCCCTTTTCCCCAAGAGTCCCATCTCTTCTGCCATGCACGAC
MAP7	5820491	0.0106309	down	-2.27638	2.40923	1.22248	9053	Homo sapiens microtubule-associated protein 7 (MAP7), mRNA.	GO:0000226|GO:0007163	GO:0005737|GO:0005874|GO:0005875|GO:0005886|GO:0016323	GO:0005198	chr6	136706782	136706831	CCTTCATGGAAGTCCTTGCTCTGCGTGGCATCTGTCAGCTTTTCACCTTT
EDG1	160754	0.0153913	down	-2.2719	1.30118	0.11728	1901	Homo sapiens endothelial differentiation, sphingolipid G-protein-coupled receptor, 1 (EDG1), mRNA.				chr1	101478843	101478892	GGCTATGTTGAGTACGTAGGCTGTGGGAAGATGAAGATGGTTTGGAGGTG
FILIP1	6200600	0.0153898	down	-2.25859	2.63416	1.45874	27145	Homo sapiens filamin A interacting protein 1 (FILIP1), mRNA.				chr6	76078933	76078982	CATCAGTTAGATGTGGGGACTCAATCACACGCTCTTCAAGTCCGGCTCCC
FLJ14213	4610672	0.00768846	down	-2.24423	3.058	1.89177	79899	Homo sapiens protor-2 (FLJ14213), mRNA.				chr11	36443131	36443180	GAGAGCTATTGGAGTGAGAGCTGAGGTGTCCTTAACCACTTTTTCTCTCC
OTP	2030477	0.0140281	down	-2.21829	4.21739	3.06794	23440	Homo sapiens orthopedia homeobox (OTP), mRNA.	GO:0002052|GO:0006355|GO:0007275|GO:0007399|GO:0021979|GO:0021985	GO:0005634	GO:0003700|GO:0043565	chr5	76960654	76960703	TCGCTGCTCTGTGCCCTTGGTTGTTTTGTGGTGGTCCTGTCGTCCCTCGT
AK3L1	160148	0.008218	down	-2.20201	0.808354	-0.330468	205	Homo sapiens adenylate kinase 3-like 1 (AK3L1), nuclear gene encoding mitochondrial protein, transcript variant 6, mRNA.	GO:0006139	GO:0005739|GO:0005759	GO:0000166|GO:0004017|GO:0005524|GO:0005525|GO:0016740	chr1	65465577	65465626	GGGGTTGAGCAGAATGTTGTACTAGCTGTGCCTGGACTGAGTATAACAGC
MEGF10	270201	0.0300694	down	-2.18004	5.78927	4.66492	84466	Homo sapiens multiple EGF-like-domains 10 (MEGF10), mRNA.	GO:0006909|GO:0007155	GO:0005886|GO:0016021|GO:0016323	GO:0005515	chr5	126824515	126824564	ACTGCCCGTTTAGAGTCCTGTTAATATTGATGTCCTAACACTGGGTCTGC
PAX6	2690575	0.0113701	down	-2.17361	2.99696	1.87687	5080	Homo sapiens paired box 6 (PAX6), transcript variant 1, mRNA.	GO:0001709|GO:0001764|GO:0006355|GO:0007275|GO:0007411|GO:0007435|GO:0008285|GO:0009950|GO:0009952|GO:0021543|GO:0021798|GO:0021902|GO:0021983|GO:0030334|GO:0030900|GO:0042462|GO:0043010|GO:0045665|GO:0045944|GO:0050767|GO:0001709|GO:0001764|GO:0006355|GO:0007275|GO:0007411|GO:0007435|GO:0008285|GO:0009950|GO:0009952|GO:0021543|GO:0021798|GO:0021902|GO:0021983|GO:0030334|GO:0030900|GO:0042462|GO:…	GO:0005634|GO:0005634|GO:0005634|GO:0005634	GO:0003677|GO:0005515|GO:0003677|GO:0005515|GO:0003677|GO:0005515|GO:0003700|GO:0003700|GO:0005515|GO:0043565	chr11	31767879	31767928	GTGTCCTGTATTGTACCACTGGGGAAGGAATGGACTTGAAACAAGGACCT
ARMCX2	3930201	0.0236805	down	-2.16377	-1.01729	-2.13084	9823	Homo sapiens armadillo repeat containing, X-linked 2 (ARMCX2), mRNA.		GO:0016020|GO:0016021	GO:0005488	chrX	100797206	100797255	CTGCTTTTCCACTTGCTCATATAGTAAAGGGATCCTTTCAGCTGCCAGTG
IRX3	5690408	0.00768846	down	-2.13087	0.54214	-0.549301	79191	Homo sapiens iroquois homeobox 3 (IRX3), mRNA.	GO:0006355	GO:0005634	GO:0003700|GO:0043565	chr16	52875097	52875146	GAACCATCTGGACGCCGCCCTGGTCTTATCGGCTCTCTCCTCATCCTAGT
NKX6-2	4880446	0.0489844	down	-2.10754	3.52341	2.44785	84504	Homo sapiens NK6 homeobox 2 (NKX6-2), mRNA.	GO:0006355|GO:0007275	GO:0005634	GO:0003700|GO:0043565	chr10	134598454	134598503	GATCACGCGGCTGCTCAAGAAGCACAAACCCTCGAACTTGGCGCTGGTCA
LEF1	4570255	0.00768846	down	-2.10011	1.50363	0.43317	51176	Homo sapiens lymphoid enhancer-binding factor 1 (LEF1), mRNA.	GO:0006350|GO:0006355|GO:0016055|GO:0000122|GO:0001756|GO:0001890|GO:0006355|GO:0021542|GO:0030111|GO:0030326|GO:0030879|GO:0042475|GO:0045843|GO:0045944|GO:0048341|GO:0048468	GO:0005634|GO:0005730|GO:0005737|GO:0005634|GO:0005667|GO:0005737	GO:0005515|GO:0005515|GO:0008301|GO:0043565|GO:0003677|GO:0003682|GO:0003705|GO:0016563	chr4	109188515	109188564	GTAATAGCCAAACCCCACTCTGTTGGTAGCAATTGGCAGCCCTATTTCAG
CNTN2	4260471	0.0157729	down	-2.09762	3.60843	2.53968	6900	Homo sapiens contactin 2 (axonal) (CNTN2), mRNA.	GO:0001764|GO:0007155	GO:0005886|GO:0005887|GO:0030424|GO:0031225	GO:0005515	chr1	203313524	203313573	GCCCCAAGACTCCTCCAACTTACCCGTCCCATCCAGGGCCTGCACAGCTT
FOXN3	1770408	0.0106309	down	-2.09028	1.8147	0.751007	1112	Homo sapiens forkhead box N3 (FOXN3), transcript variant 1, mRNA.	GO:0000077|GO:0000085|GO:0006350|GO:0007049|GO:0045892	GO:0005634	GO:0003700|GO:0008022|GO:0016564|GO:0043565	chr14	89627059	89627108	AGGGCTTGGATGGTTGAACTCTGTACTGCCTTGTGTGCACTTCAGCCCCG
ARL4A	1410113	0.0236534	down	-2.08003	2.70542	1.64882	10124	Homo sapiens ADP-ribosylation factor-like 4A (ARL4A), transcript variant 1, mRNA.	GO:0007264	GO:0005622|GO:0005634	GO:0000166|GO:0003924|GO:0005525	chr7	12693798	12693847	GCTAAGCTGGAAGGGTGCTTATCCCTGCGTAGAAACGCCTGCCAATGCTT
CCDC48	5310685	0.039061	down	-2.07896	4.431	3.37514	79825	Homo sapiens coiled-coil domain containing 48 (CCDC48), mRNA.				chr3	130241920	130241969	GGCTCCCTGGTAGAAGCTGGCCTTGAACCAGCTCTAGAGGACAGGTAGGA
AK3L1	4610554	0.0104814	down	-2.07377	1.18824	0.135983	205	Homo sapiens adenylate kinase 3-like 1 (AK3L1), nuclear gene encoding mitochondrial protein, transcript variant 7, mRNA.	GO:0006139	GO:0005739|GO:0005759	GO:0000166|GO:0004017|GO:0005524|GO:0005525|GO:0016740	chr1	65463074	65463123	CCCGAAGCAGTTGCTGCCAGGCTAAGACAGTACAAAGACGTGGCAAAGCC
AK3L1	4290192	0.0153913	down	-2.05178	0.637319	-0.399554	205	Homo sapiens adenylate kinase 3-like 1 (AK3L1), nuclear gene encoding mitochondrial protein, transcript variant 7, mRNA.	GO:0006139	GO:0005739|GO:0005759	GO:0000166|GO:0004017|GO:0005524|GO:0005525|GO:0016740	chr1	65465168	65465217	CTGAGAGCGATGGGGCTATATTGAATCTCTGTATGCACTGAGAACTGAGC
MGC61598	3800482	0.0153913	down	-2.03707	4.28176	3.25527	441478	PREDICTED: Homo sapiens similar to ankyrin-repeat protein Nrarp (MGC61598), mRNA.							ACTTGAGGACACAGGTGGGTGGAGGCCCTTTGTGCGTGGCTGGTCGTATT
TFPI	4850731	0.0203291	down	-2.028	-0.268653	-1.28871	7035	Homo sapiens tissue factor pathway inhibitor (lipoprotein-associated coagulation inhibitor) (TFPI), transcript variant 1, mRNA.	GO:0007598	GO:0005576|GO:0005576|GO:0005634|GO:0005737|GO:0005886	GO:0004867	chr2	188332602	188332651	CGGTCCCTCATGGTGTCTCACTCCAGCAGACAGAGGATTGTGTCGTGCCA
S1PR1	4810768	0.0446202	down	-2.02466	0.969519	-0.0481583	1901	Homo sapiens sphingosine-1-phosphate receptor 1 (S1PR1), mRNA.	GO:0001525|GO:0007165|GO:0007186|GO:0007193|GO:0007420|GO:0008284|GO:0030155	GO:0005886|GO:0016021	GO:0001619|GO:0004872	chr1	101706484	101706533	GCCAGGATCCTTGGTGTCCTAGGAGAAACAGACAAGCAAAACAAAGTGAA
KLHL35	510632	0.0269345	down	-2.02344	2.65037	1.63356	283212	Homo sapiens kelch-like 35 (Drosophila) (KLHL35), mRNA.				chr11	74811172	74811221	AGATGCACACTCTGCTCCCTCATGGCACCTCCACGCAAACAGCCCTTAAC
CDKN1C	5890653	0.0254682	down	-2.02203	2.18229	1.16648	1028	Homo sapiens cyclin-dependent kinase inhibitor 1C (p57, Kip2) (CDKN1C), mRNA.	GO:0000122|GO:0007050|GO:0042551|GO:0007050|GO:0000079|GO:0000080|GO:0007050|GO:0030511|GO:0045786|GO:0050680	GO:0005634|GO:0005634|GO:0005634|GO:0005730|GO:0005737|GO:0005737	GO:0004861|GO:0005515|GO:0004861|GO:0016301|GO:0045735|GO:0004860|GO:0004861|GO:0005515	chr11	2861687	2861819	AAGAGGCTGCGGTGAGCCAATTTAGAGCCCAAAGAGCCCCGAGGGAACCT
PAX6	1740100	0.0212558	down	-2.01718	3.51698	2.50464	5080	Homo sapiens paired box 6 (PAX6), transcript variant 2, mRNA.	GO:0001709|GO:0001764|GO:0006355|GO:0007275|GO:0007411|GO:0007435|GO:0008285|GO:0009950|GO:0009952|GO:0021543|GO:0021798|GO:0021902|GO:0021983|GO:0030334|GO:0030900|GO:0042462|GO:0043010|GO:0045665|GO:0045944|GO:0050767|GO:0001709|GO:0001764|GO:0006355|GO:0007275|GO:0007411|GO:0007435|GO:0008285|GO:0009950|GO:0009952|GO:0021543|GO:0021798|GO:0021902|GO:0021983|GO:0030334|GO:0030900|GO:0042462|GO:…	GO:0005634|GO:0005634|GO:0005634|GO:0005634	GO:0003677|GO:0005515|GO:0003677|GO:0005515|GO:0003677|GO:0005515|GO:0003700|GO:0003700|GO:0005515|GO:0043565	chr11	31771567	31771616	ACAGCGCTCTGCCGCCTATGCCCAGCTTCACCATGGCAAATAACCTGCCT
CLYBL	2070044	0.0307264	down	-2.00244	1.3722	0.37044	171425	Homo sapiens citrate lyase beta like (CLYBL), mRNA.	GO:0006725|GO:0006725|GO:0006725|GO:0006725	GO:0005739|GO:0009346	GO:0000287|GO:0008815|GO:0016830|GO:0016829|GO:0016830|GO:0016830|GO:0016830	chr13	99342703	99342752	AGGGTATTGAAGCTGCAGAGGGATCAACTTGTGCTTGCCAGAGGACGCCA
PDZRN4	6420240	0.0269345	down	-2.00204	3.05482	2.05336	29951	Homo sapiens PDZ domain containing ring finger 4 (PDZRN4), transcript variant 2, mRNA.			GO:0005515|GO:0008270|GO:0046872	chr12	40253993	40254042	GAGGATGCTACCAGTTTCGGTAGAGTATGATTGCCTCGTTCAATGTGGCG
SLC1A3	4210403	0.0373202	down	-1.99523	3.66482	2.66826	6507	Homo sapiens solute carrier family 1 (glial high affinity glutamate transporter), member 3 (SLC1A3), mRNA.	GO:0006835|GO:0001504|GO:0006810|GO:0006835|GO:0007268|GO:0015813	GO:0016020|GO:0005624|GO:0016020|GO:0016021|GO:0042995|GO:0043025	GO:0017153|GO:0005313|GO:0015293|GO:0017153	chr5	36724057	36724106	TATGGAAAGGTCCTGTGGGGAGCCCATCATCTCGCCAAGCCATCACAGGC
TNFRSF19	2360672	0.00949059	down	-1.99476	1.21096	0.214744	55504	Homo sapiens tumor necrosis factor receptor superfamily, member 19 (TNFRSF19), transcript variant 2, mRNA.	GO:0006915|GO:0006917|GO:0007254	GO:0005739|GO:0016020|GO:0016021	GO:0004872|GO:0005031|GO:0005515	chr13	23147852	23147901	GGTAATGCGTGTGGCTGAATGGGCATAACCACTGTGGCTTCTTGTGCTGC
LEF1	2810601	0.00629722	down	-1.97615	1.17751	0.194813	51176	Homo sapiens lymphoid enhancer-binding factor 1 (LEF1), mRNA.	GO:0006350|GO:0006355|GO:0016055|GO:0000122|GO:0001756|GO:0001890|GO:0006355|GO:0021542|GO:0030111|GO:0030326|GO:0030879|GO:0042475|GO:0045843|GO:0045944|GO:0048341|GO:0048468	GO:0005634|GO:0005730|GO:0005737|GO:0005634|GO:0005667|GO:0005737	GO:0005515|GO:0005515|GO:0008301|GO:0043565|GO:0003677|GO:0003682|GO:0003705|GO:0016563	chr4	109188592	109188641	GTGGCTTCTCTGTGAATTGCCTGTAACACATAGTGGCTTCTCCGCCCTTG
PAQR6	6550367	0.0265439	down	-1.96248	2.61396	1.64128	79957	Homo sapiens progestin and adipoQ receptor family member VI (PAQR6), transcript variant 1, mRNA.		GO:0016020|GO:0016021|GO:0016021|GO:0016021	GO:0004872|GO:0004872|GO:0004872	chr1	156213477	156213526	GGCCTACCCTGAATGCTTCTTGCTAACCAGGCCGAGAGGCCACACACTTG
C13orf30	3170288	0.0256201	down	-1.96127	1.56112	0.589333	144809	Homo sapiens chromosome 13 open reading frame 30 (C13orf30), mRNA.				chr13	42263444	42263493	TAGTTGGCTCTCAGTACATATGGTGTCAGCTCATGTGTCTCCAGCCCCTG
PNPO	3180600	0.0153913	down	-1.95612	-0.536843	-1.50484	55163	Homo sapiens pyridoxamine 5'-phosphate oxidase (PNPO), mRNA.	GO:0008615|GO:0055114		GO:0004733|GO:0010181|GO:0016491	chr17	43380480	43380529	TATTCCCAGTCCGTCAGGAATTTTGTAGAAGGGCTTCATGTGCTGGTACC
TFPI	1340039	0.020559	down	-1.95069	-0.225251	-1.18924	7035	Homo sapiens tissue factor pathway inhibitor (lipoprotein-associated coagulation inhibitor) (TFPI), transcript variant 1, mRNA.	GO:0007598	GO:0005576|GO:0005576|GO:0005634|GO:0005737|GO:0005886	GO:0004867	chr2	188348856	188348905	CAATGCTGTGAATAACTCCCTGACTCCGCAATCAACCAAGGTTCCCAGCC
PSAT1	4850674	0.0127967	down	-1.94491	-0.475848	-1.43555	29968	Homo sapiens phosphoserine aminotransferase 1 (PSAT1), transcript variant 2, mRNA.	GO:0006564|GO:0008152|GO:0008615|GO:0008652		GO:0004648|GO:0016740|GO:0030170	chr9	80134501	80134550	GCATTCCATTAGCAAGAGTTGTACCCCCTCCCCAGTCTTCGCCTTCCTCT
DNASE2	6200315	0.023486	down	-1.90557	-0.600008	-1.53023	1777	Homo sapiens deoxyribonuclease II, lysosomal (DNASE2), mRNA.	GO:0006308|GO:0006915|GO:0007275|GO:0030218	GO:0005576|GO:0005764	GO:0003677|GO:0004519|GO:0004531|GO:0005179|GO:0005515|GO:0016787	chr19	12986103	12986152	CCCCTTCCTAGCTGTATGACCTTGATTGTGTGCCTTAACCGCTCTGTGAC
P2RY5	2760112	0.0162886	down	-1.89943	0.0154107	-0.910153	10161	Homo sapiens purinergic receptor P2Y, G-protein coupled, 5 (P2RY5), mRNA.	GO:0007165|GO:0007186	GO:0005886|GO:0016021	GO:0004872|GO:0045028	chr13	47884066	47884115	GCACCCGCCGTTTTTGTTCAGTCTACCCACTCTCAGGGTAACAATGCCTC
EFHD1	1980484	0.0315288	down	-1.89633	2.50663	1.58342	80303	Homo sapiens EF-hand domain family, member D1 (EFHD1), mRNA.	GO:0031175	GO:0005743	GO:0005509|GO:0005515	chr2	233255458	233255507	GTATTACAGTAGACCGCTGACGTTCCCAAGTGACAGATCCAGGGCCTTTC
FAM181B	5090458	0.0260886	down	-1.89488	4.44506	3.52295	220382	Homo sapiens family with sequence similarity 181, member B (FAM181B), mRNA.				chr11	82443449	82443498	CGGGACTGACTTCGAGGCACGCTTCCCTTCATTAGAGACGGCTGTGGAGA
DSG2	7560433	0.0155246	down	-1.88026	2.40101	1.49008	1829	Homo sapiens desmoglein 2 (DSG2), mRNA.	GO:0007155|GO:0007156	GO:0005886|GO:0016021|GO:0030057|GO:0031965	GO:0005509|GO:0005515	chr18	29128607	29128656	GTGTACTCAAACAAAAGTTGGTCTTAAGCTTCCACCTTGAGCAGCCTTGG
CNPY1	1440678	0.0109402	down	-1.86913	1.67211	0.769748	285888	Homo sapiens canopy 1 homolog (zebrafish) (CNPY1), mRNA.				chr7	155294165	155294214	TTCCTGAAAACCTAGTGACCTTCACAGGAACATGGCGGGACCTGTGACAC
PAQR6	5870397	0.0153898	down	-1.86483	2.25744	1.3584	79957	Homo sapiens progestin and adipoQ receptor family member VI (PAQR6), transcript variant 2, mRNA.		GO:0016020|GO:0016021|GO:0016021|GO:0016021	GO:0004872|GO:0004872|GO:0004872	chr1	156213473	156213522	TACCCTGAATGCTTCTTGCTAACCAGGCCGAGAGGCCACACACTTGCCCC
ZIC2	510368	0.0340977	down	-1.86282	4.49959	3.6021	7546	Homo sapiens Zic family member 2 (odd-paired homolog, Drosophila) (ZIC2), mRNA.	GO:0006813|GO:0007275|GO:0007399|GO:0007420|GO:0030154	GO:0005622|GO:0005622|GO:0005634|GO:0008076	GO:0003676|GO:0008270|GO:0003677|GO:0005249|GO:0008270|GO:0046872	chr13	99436571	99436620	GCCGTGCCAAAGTCTCCCTTCTGTTTCTTCAGCACATTGACCCATAGCAC
SLC44A3	4230500	0.00764478	down	-1.84642	1.38947	0.504736	126969	Homo sapiens solute carrier family 44, member 3 (SLC44A3), mRNA.		GO:0016020|GO:0016021		chr1	95105504	95105553	CCGATGCTGCTACTGCTGTTTCTGGTGTCTTGACAAATACCTGCTCCATC
ADORA2B	2060040	0.0309562	down	-1.8345	0.831463	-0.0439261	136	Homo sapiens adenosine A2b receptor (ADORA2B), mRNA.	GO:0000187|GO:0006968|GO:0007165|GO:0007186|GO:0007190|GO:0007254|GO:0007588	GO:0005886|GO:0005887	GO:0001609|GO:0004872	chr17	15819473	15819522	CACAAGGAAATGGACTGCCTCTCTTGAGCACTTCCCTGGAGCTACCACGT
VAT1L	3460392	0.0310091	down	-1.83165	2.97198	2.09884	57687	Homo sapiens vesicle amine transport protein 1 homolog (T. californica)-like (VAT1L), mRNA.				chr16	76571195	76571244	CTAGAGTTTGACCAATAAGACCAATTTCTGCCATGAAGAACCGGGGGACG
OLFM4	6770131	0.016634	down	-1.82955	1.62757	0.756083	10562	Homo sapiens olfactomedin 4 (OLFM4), mRNA.	GO:0007155	GO:0005576|GO:0016020	GO:0005515	chr13	52524108	52524157	TGTTCAAGTCCTAGTCTATAGGATTGGCAGTTTAAATGCTTTACTCCCCC
HSD17B14	2230133	0.03934	down	-1.82286	0.101732	-0.764472	51171	Homo sapiens hydroxysteroid (17-beta) dehydrogenase 14 (HSD17B14), mRNA.	GO:0006629|GO:0006706|GO:0055114	GO:0005737|GO:0005829	GO:0004303|GO:0005488|GO:0016491|GO:0047045	chr19	54008325	54008374	GCAGTGTTCCTGGCCTCCGAAGCCAACTTCTGCACGGGCATTGAACTGCT
KIAA1644	3190592	0.0258692	down	-1.81211	1.36345	0.505784	85352	PREDICTED: Homo sapiens KIAA1644 protein (KIAA1644), mRNA.		GO:0016020|GO:0016021					ACTTCATGTGAGCAGGCATGGGGTCTCCCTGAGAGCTGATAACCGGGAAA
TRIL	5690239	0.0100785	down	-1.80869	2.36234	1.5074	9865	Homo sapiens TLR4 interactor with leucine rich repeats (TRIL), mRNA.				chr7	28993097	28993146	GGCCTCTGGTTCTCCTCACCACCCACCTTTTCAGCCATAGAACATCACTG
C18orf51	6450097	0.0445458	down	-1.79395	1.21679	0.373655	125704	Homo sapiens chromosome 18 open reading frame 51 (C18orf51), mRNA.				chr18	70254006	70254055	TAGGGTGGGGAGTGGTGCTTTCTCTAGTGTGTCCTCCGGAACATCTTGCC
SERPING1	2030309	0.0284447	down	-1.78722	-0.593962	-1.43168	710	Homo sapiens serpin peptidase inhibitor, clade G (C1 inhibitor), member 1 (SERPING1), transcript variant 2, mRNA.	GO:0006958|GO:0007596|GO:0008015|GO:0008015|GO:0045087	GO:0005576|GO:0005576|GO:0031093	GO:0004867|GO:0004867	chr11	57138571	57138620	TGGGACCAGCAGCACAAGTTCCCTGTCTTCATGGGGCGAGTATATGACCC
ZC3HAV1	6620750	0.0295767	down	-1.78534	-2.1388	-2.975	56829	Homo sapiens zinc finger CCCH-type, antiviral 1 (ZC3HAV1), transcript variant 1, mRNA.	GO:0009615	GO:0005634|GO:0005737	GO:0003723|GO:0003950|GO:0008270|GO:0046872	chr7	138728421	138728470	TGTAAGCCCCCTGAGGGTTGAGTCAGTCTGTCTTGTTTGCTGTGCCACGC
ZNF217	60672	0.0175399	down	-1.78186	-1.02981	-1.86319	7764	Homo sapiens zinc finger protein 217 (ZNF217), mRNA.	GO:0006355	GO:0005622|GO:0005634|GO:0005622	GO:0003700|GO:0008270|GO:0046872|GO:0008270	chr20	52184280	52184329	GCTCCTGTGTTACAAGGGAGAACTCATTTGAGATCAGTCTGTTGGCATTG
C7orf41	1740458	0.0143332	down	-1.78108	2.15115	1.3184	222166	Homo sapiens chromosome 7 open reading frame 41 (C7orf41), mRNA.				chr7	30168830	30168879	CCTCCCCTGAGAGTGAGGACCTCATCCGACCATGTAATTACCATTCGCTT
CLCN3	3440463	0.0100785	down	-1.77384	1.11887	0.291999	1182	Homo sapiens chloride channel 3 (CLCN3), transcript variant e, mRNA.	GO:0006811|GO:0006821|GO:0006885|GO:0048388	GO:0000139|GO:0005794|GO:0005794|GO:0005886|GO:0009986|GO:0012506|GO:0012506|GO:0012506|GO:0016021|GO:0031901|GO:0031902	GO:0005244|GO:0005247|GO:0005515|GO:0030165|GO:0030165|GO:0031404|GO:0042803|GO:0046982|GO:0046982	chr4	170641911	170641960	AGTCTCGAAGGAAGCGAGAACGAAATCTCTCATTGTGTGCCGTGTGGCTC
PLP1	5570491	0.0215645	down	-1.77358	1.54384	0.717178	5354	Homo sapiens proteolipid protein 1 (PLP1), transcript variant 1, mRNA.	GO:0022010|GO:0042759|GO:0048469|GO:0022010|GO:0042759|GO:0048469|GO:0022010|GO:0042759|GO:0048469|GO:0022010|GO:0042759|GO:0048469|GO:0022010|GO:0042759|GO:0048469|GO:0022010|GO:0042759|GO:0048469|GO:0007268|GO:0008366|GO:0022010|GO:0042759|GO:0048469	GO:0043209|GO:0043209|GO:0043209|GO:0043209|GO:0043209|GO:0043209|GO:0016020|GO:0016021|GO:0043209	GO:0005515|GO:0005515|GO:0005515|GO:0005515|GO:0005515|GO:0005515|GO:0005198|GO:0005515	chrX	102928227	102928276	GAGGGGTTCCAGAGGCCAACATCAAGCTCATTCTTTGGAGCGGGTGTGTC
PYGL	2760427	0.00985908	down	-1.77245	-1.21947	-2.04522	5836	Homo sapiens phosphorylase, glycogen, liver (PYGL), mRNA.	GO:0005975|GO:0005975|GO:0005977|GO:0005977|GO:0042593	GO:0005625|GO:0005634|GO:0005730|GO:0005737|GO:0005886	GO:0004645|GO:0000166|GO:0002060|GO:0005524|GO:0005536|GO:0008144|GO:0008144|GO:0008184|GO:0008184|GO:0008184|GO:0016208|GO:0016208|GO:0016757|GO:0030170|GO:0032052|GO:0042803	chr14	50441973	50442022	ATCCAAAGGCCTGGAACACAATGGTACTCAAAAACATAGCTGCCTCGGGG
NTRK2	3870246	0.00768846	down	-1.77075	6.72103	5.89666	4915	Homo sapiens neurotrophic tyrosine kinase, receptor, type 2 (NTRK2), transcript variant b, mRNA.	GO:0006468|GO:0007169|GO:0006468|GO:0007169|GO:0007169|GO:0007190|GO:0007275|GO:0007399|GO:0030154	GO:0016020|GO:0016021|GO:0005887|GO:0016020	GO:0004872|GO:0005515|GO:0016301|GO:0000166|GO:0004714|GO:0004872|GO:0005515|GO:0005524|GO:0016740|GO:0000166|GO:0004714|GO:0004872|GO:0005515|GO:0005524|GO:0016740|GO:0043121	chr9	86619976	86620025	GAGTGAGCACCCAGAATGTGTTGAACCAACCCCCACCCCTAACTACTGAC
CA14	4200400	0.0397584	down	-1.76282	4.80106	3.98318	23632	Homo sapiens carbonic anhydrase XIV (CA14), mRNA.	GO:0006730	GO:0016020|GO:0016021	GO:0004089|GO:0008270|GO:0016829|GO:0046872	chr1	148503763	148503812	GGCCAGAAACACTGTAGGAGTAGTAAGCAGATGTCCTCCTTCCCCTGGAC
CLYBL	4610273	0.0297246	down	-1.76039	1.08092	0.265022	171425	Homo sapiens citrate lyase beta like (CLYBL), mRNA.	GO:0006725|GO:0006725|GO:0006725|GO:0006725	GO:0005739|GO:0009346	GO:0000287|GO:0008815|GO:0016830|GO:0016829|GO:0016830|GO:0016830|GO:0016830	chr13	99341601	99341650	TCGACATGCCATTACTGAAGCAGGCCCAGAACACTGTTACGCTTGCCACC
NHLH1	6200377	0.00768846	down	-1.75686	1.20832	0.395324	4807	Homo sapiens nescient helix loop helix 1 (NHLH1), mRNA.	GO:0006355|GO:0007275|GO:0007417|GO:0030154	GO:0005634	GO:0003677|GO:0030528	chr1	158609040	158609089	GGGCTCCTGGATGTCCTTCCTCAACTCCCTCCACCCCTAGACAATCCTAC
TCEAL2	3940424	0.0323483	down	-1.75425	2.73773	1.92688	140597	Homo sapiens transcription elongation factor A (SII)-like 2 (TCEAL2), mRNA.	GO:0006350|GO:0006355	GO:0005634		chrX	101269209	101269258	CCTCCTGCTACCAGTAGCGTTTTGACCCACCTGCCAGTGTTTGCTTGCTC
MLC1	7000736	0.0250632	down	-1.75381	1.96141	1.15091	23209	Homo sapiens megalencephalic leukoencephalopathy with subcortical cysts 1 (MLC1), transcript variant 2, mRNA.	GO:0006412|GO:0006811|GO:0008150	GO:0000299|GO:0005622|GO:0005634|GO:0005737|GO:0005840|GO:0016020|GO:0016021	GO:0003674|GO:0003735|GO:0005216	chr22	50523643	50523692	CCCCGGCGTGATGTGTTCATGGACGAAGTTGCCGATGGATGTTGTCAGGT
FAM181B	4730242	0.0147912	down	-1.75268	5.83134	5.02178	220382	Homo sapiens family with sequence similarity 181, member B (FAM181B), mRNA.				chr11	82443138	82443187	GCTGGCTTCTGTAGCCACCTGTCCCTTCTATTTTTCAGCGAAGGTCAGTG
MARCH3	4670255	0.018703	down	-1.75014	1.58728	0.779814	115123	PREDICTED: Homo sapiens membrane-associated ring finger (C3HC4) 3 (MARCH3), mRNA.	GO:0006511|GO:0006897	GO:0005768|GO:0016020|GO:0016021|GO:0030659|GO:0031410|GO:0031901	GO:0008270|GO:0016874|GO:0046872				CTCAGTTTCTCGTATGGATTCTTTGGGGTACTTTGGTAGCCTGAGTGGTC
TCEAL7	3310273	0.0372481	down	-1.74703	0.940228	0.135327	56849	Homo sapiens transcription elongation factor A (SII)-like 7 (TCEAL7), mRNA.	GO:0006350|GO:0006355|GO:0008150	GO:0005634|GO:0005575	GO:0003674	chrX	102473237	102473286	AGGGCTCTGCATTCTAACCATAGGCATTCTCGGGACCGTCCTTATCCCAT
FAM107A	5390463	0.0224873	down	-1.74074	3.19487	2.39517	11170	Homo sapiens family with sequence similarity 107, member A (FAM107A), transcript variant 2, mRNA.	GO:0001558	GO:0005634	GO:0003674|GO:0005515	chr3	58549984	58550033	TCCCTGGGCCTCTTCTTCCTACCTTGATTGAGGGTGTGATGCCTGGAGCC
LOC283116	2360546	0.0153898	down	-1.74025	1.15831	0.35902	283116	PREDICTED: Homo sapiens similar to ring finger protein 18, transcript variant 1 (LOC283116), mRNA.							GACCTACCAGCCGAGTAGGATTATTCCTGGATTGTGAGGCTAAGACTGTG
CPT1B	5820220	0.0206313	down	-1.73705	1.30073	0.504096	1375	Homo sapiens carnitine palmitoyltransferase 1B (muscle) (CPT1B), nuclear gene encoding mitochondrial protein, transcript variant 4, mRNA.	GO:0006629|GO:0006631|GO:0006635|GO:0006810|GO:0006853|GO:0046320	GO:0005739|GO:0005741|GO:0016020|GO:0016021	GO:0004095|GO:0008415|GO:0016740				ACCCCAAAACGGCGGCGCGCCTCGTCGCTGTCGCGTGACGCCGAGCGCCG
CSPG5	160397	0.00874808	down	-1.73671	5.07517	4.27882	10675	Homo sapiens chondroitin sulfate proteoglycan 5 (neuroglycan C) (CSPG5), mRNA.	GO:0001558|GO:0007275|GO:0007399|GO:0030154|GO:0046907|GO:0050804	GO:0005624|GO:0005783|GO:0005789|GO:0005794|GO:0005886|GO:0005887|GO:0030660	GO:0005515|GO:0005515|GO:0008083	chr3	47604113	47604162	CGCCCAAACTTGAGGGTGGCAAAGGTGACCAGGCTGACTTGGATGTGAAC
SCUBE2	6980358	0.00768846	down	-1.73631	2.50032	1.70429	57758	Homo sapiens signal peptide, CUB domain, EGF-like 2 (SCUBE2), mRNA.			GO:0005509	chr11	9044863	9044912	TGGGAGGACTCAGTTTCTCCACAGCCTTCTCCAGCCTGTGTGATACAAGT
NOVA1	3780402	0.0201965	down	-1.73529	3.67606	2.88088	4857	Homo sapiens neuro-oncological ventral antigen 1 (NOVA1), transcript variant 3, mRNA.	GO:0000398|GO:0007268|GO:0007626|GO:0008380	GO:0005634|GO:0005634|GO:0005730	GO:0003729|GO:0005515	chr14	26939523	26939572	CTCCCCAACAGTATTTTCCAGTAGATTCTAATCATGTGGTAGGGCAGAAG
GALC	3440491	0.0100785	down	-1.73399	-2.50929	-3.30338	2581	Homo sapiens galactosylceramidase (GALC), transcript variant 1, mRNA.	GO:0005975|GO:0006683|GO:0008152	GO:0005764	GO:0004336|GO:0016798|GO:0043169	chr14	88399624	88399673	CACCCCAGAAGGTTCTCTTGTATACCTGCTCAGTCAGTTCCTTTCACTCC
LYRM7	3850445	0.0284447	down	-1.72069	0.505854	-0.277129	90624	Homo sapiens Lyrm7 homolog (mouse) (LYRM7), mRNA.				chr5	130540167	130540216	TCTGACCCACCAACATGACTGATGCTCAAAGGAAATGGCCACTGGAAGAT
RNF144B	70630	0.0272968	down	-1.71861	-0.14917	-0.930409	255488	Homo sapiens ring finger protein 144B (RNF144B), mRNA.	GO:0006915|GO:0042787	GO:0000151|GO:0016020|GO:0016021	GO:0004842|GO:0005515|GO:0008270|GO:0009055|GO:0016874|GO:0046872|GO:0051536	chr6	18468232	18468281	GGCCAGTGACAGAGTTTACCCTTGCCTCCTTTCTTGGTCTGCCAGCTTTG
C5orf4	1690240	0.0164316	down	-1.71737	-0.107959	-0.888162	10826	Homo sapiens chromosome 5 open reading frame 4 (C5orf4), mRNA.	GO:0008152	GO:0016020|GO:0016021	GO:0003824	chr5	154198595	154198644	CTCCCTAGGAGGCTTTTGCCCTCAGCTTGAATACAGTTCCTGGTGCATCA
UST	7380338	0.0370286	down	-1.71341	0.61146	-0.165409	10090	Homo sapiens uronyl-2-sulfotransferase (UST), mRNA.	GO:0006477	GO:0000139|GO:0005794|GO:0016020|GO:0016021	GO:0008146|GO:0016740	chr6	149439344	149439393	ACTTACAGGGCCTTAATGTTATTTTGTCCCAGCCAACACCCTCTAGGTCC
FNDC5	3390739	0.0323483	down	-1.71204	2.88294	2.10722	252995	Homo sapiens fibronectin type III domain containing 5 (FNDC5), mRNA.		GO:0005777|GO:0005778|GO:0016020|GO:0016021		chr1	33327976	33328025	TGGGAGGGCATGAGGCTCCACTCATTGTCTTGTGACTTCCATCCCTGCTG
CAPSL	3710176	0.0385966	down	-1.70753	1.3929	0.620989	133690	Homo sapiens calcyphosine-like (CAPSL), transcript variant 1, mRNA.		GO:0005737	GO:0005509	chr5	35940381	35940430	CATGATGAGAACCGCCTGGAAGCTTTAAGCACATGACCTGGGGACCAGGC
LRRC23	10392	0.0158294	down	-1.70665	1.59843	0.827271	10233	Homo sapiens leucine rich repeat containing 23 (LRRC23), transcript variant 1, mRNA.	GO:0008150	GO:0005575	GO:0003674|GO:0005515	chr12	6892395	6892444	GCGTGACCTGGAACCCGAACAGTCATTGATCTAGCAGCAGTTCTAGCCTC
MAOA	6550528	0.0276649	down	-1.69575	1.74897	0.987043	4128	Homo sapiens monoamine oxidase A (MAOA), nuclear gene encoding mitochondrial protein, mRNA.	GO:0006584|GO:0007610|GO:0042420|GO:0055114	GO:0005739|GO:0005741|GO:0016020|GO:0016021	GO:0005515|GO:0008131|GO:0009055|GO:0016491	chrX	43490870	43490919	GGTGCCTAATGTTCCATGTCTGAAGTTTGCCCCAGTGCTACACGTTGGAG
C11orf70	4060437	0.0447541	down	-1.69358	1.41509	0.655006	85016	Homo sapiens chromosome 11 open reading frame 70 (C11orf70), mRNA.				chr11	101459077	101459126	GGATCCTATCAGGCGTCACCTTCATGTTTTATACCACTGTTATGGTGTGG
C11orf70	4540465	0.0355268	down	-1.69259	1.33555	0.576316	85016	Homo sapiens chromosome 11 open reading frame 70 (C11orf70), mRNA.				chr11	101451902	101451951	GCCTTGGTGGAGCCCTTTGTCAATATGAGGATGTGATTAGCCCATATCTG
PRPH	5960180	0.0247803	down	-1.68758	3.87361	3.11866	5630	Homo sapiens peripherin (PRPH), mRNA.	GO:0045104	GO:0005883|GO:0030424	GO:0005198|GO:0005515	chr12	47978638	47978687	TCCCCCCTCAGGACAAATCTACTCCAGCCACGATGAGAAGTGGGTGAGCC
DLG2	450528	0.0158294	down	-1.6792	1.98681	1.23903	1740	Homo sapiens discs, large homolog 2, chapsyn-110 (Drosophila) (DLG2), mRNA.		GO:0005886|GO:0030054|GO:0045202|GO:0045211	GO:0004385|GO:0005515|GO:0005515	chr11	82855404	82855453	GCCCAGCTCTATCCCATTGCCATCTTCATAAAACCCAGGTCTCTGGAATC
ADAP2	3990433	0.0438798	down	-1.67865	1.83319	1.08589	55803	Homo sapiens ArfGAP with dual PH domains 2 (ADAP2), mRNA.				chr17	26310214	26310263	GCTGGGTTGTGCATTAAGGGCCAGTTTACTTGTCTGCCTCTTTGACCACC
MARCH3	6760167	0.0179086	down	-1.67512	1.64255	0.898282	115123	PREDICTED: Homo sapiens membrane-associated ring finger (C3HC4) 3 (MARCH3), mRNA.	GO:0006511|GO:0006897	GO:0005768|GO:0016020|GO:0016021|GO:0030659|GO:0031410|GO:0031901	GO:0008270|GO:0016874|GO:0046872				GGTAGCCTGAGTGGTCTTTTTCATCTCTTTCGCGTCCATTACTCAAGGAG
THBS4	6200253	0.00949059	down	-1.67348	1.4641	0.721248	7060	Homo sapiens thrombospondin 4 (THBS4), mRNA.	GO:0006930|GO:0007155	GO:0005576|GO:0005576|GO:0005578|GO:0031093	GO:0005198|GO:0005509|GO:0005515|GO:0008201	chr5	79373892	79373941	TCTGGCGTCACCATAGACACCACAATGCGTGGAGGCCGACTTGGCGTTTT
DPH5	4290010	0.0157108	down	-1.65261	0.360931	-0.363818	51611	Homo sapiens DPH5 homolog (S. cerevisiae) (DPH5), transcript variant 3, mRNA.	GO:0008152|GO:0017183		GO:0004164|GO:0008168|GO:0016740	chr1	101455810	101455859	AATTCCCAGGTGTTGTGGTAGGTAATTGAATCATGGGGGCAGTTTCCCTC
LOC145837	4050674	0.0140527	down	-1.64147	1.05229	0.337296	145837	PREDICTED: Homo sapiens hypothetical protein LOC145837, transcript variant 2 (LOC145837), mRNA.				chr15	67650682	67650731	GAGTTTCCAGCCTGTTGCCCTGTGGAATTCAAACTCAGGACTCCGGTCTA
JAG1	5720735	0.0378374	down	-1.64072	3.51141	2.79708	182	Homo sapiens jagged 1 (Alagille syndrome) (JAG1), mRNA.	GO:0001525|GO:0001709|GO:0002011|GO:0007154|GO:0007275|GO:0007399|GO:0009887|GO:0030097|GO:0030216|GO:0030334|GO:0042127|GO:0042491|GO:0045445|GO:0045446|GO:0045596|GO:0045639|GO:0045747|GO:0048839	GO:0005576|GO:0005886|GO:0005887	GO:0005112|GO:0005198|GO:0005509|GO:0005515|GO:0008083	chr20	10566517	10566566	CTGCCACCCTGCTGAGTCTGTTCTGGTAATCGGGGTATAATAGGCTCTGC
LRRC23	10523	0.0383335	down	-1.63839	1.56846	0.856185	10233	Homo sapiens leucine rich repeat containing 23 (LRRC23), transcript variant 1, mRNA.	GO:0008150	GO:0005575	GO:0003674|GO:0005515	chr12	6893390	6893439	GGATGCCTGTTTTTGCCCCAAAGCTGGAAATTCATCACAACCTGAGGCCC
CD36	1010592	0.043264	down	-1.63783	1.46798	0.756195	948	Homo sapiens CD36 molecule (thrombospondin receptor) (CD36), transcript variant 1, mRNA.	GO:0006629|GO:0006810|GO:0007155|GO:0007596|GO:0042953|GO:0043277	GO:0005624|GO:0005794|GO:0005886|GO:0005886|GO:0005887|GO:0031092	GO:0004872|GO:0005041|GO:0008034	chr7	80143770	80143819	CACCATCATCCCAGTAGCTGCCCTATTCAACTGCAACAGTCTCCAGGACC
APCDD1	4280739	0.0327464	down	-1.63399	2.06416	1.35577	147495	Homo sapiens adenomatosis polyposis coli down-regulated 1 (APCDD1), mRNA.		GO:0016020|GO:0016021		chr18	10478228	10478277	CCGTCCAGCCTGATCCCTGGCCTGAGCAACTTCACAACAGTAATTGCACT
SLC10A4	7000176	0.0271931	down	-1.62385	2.10197	1.40255	201780	Homo sapiens solute carrier family 10 (sodium/bile acid cotransporter family), member 4 (SLC10A4), mRNA.	GO:0006811|GO:0006814	GO:0016020|GO:0016021	GO:0008508|GO:0015293|GO:0031402	chr4	48185684	48185733	ATGATGGAAACCGCTCAGACTTCTCTCTAAATGTGGAGATACACAGGAGC
RASSF4	10639	0.0153898	down	-1.62217	1.41015	0.712222	83937	Homo sapiens Ras association (RalGDS/AF-6) domain family member 4 (RASSF4), mRNA.	GO:0007165|GO:0045786		GO:0005515	chr10	44810022	44810071	GTCACAGCAGGATTTCCCCAACCCAGCTCCATCATCACAGACACAGAGAG
SUCLG2	4060692	0.0206254	down	-1.61564	-1.56882	-2.26093	8801	Homo sapiens succinate-CoA ligase, GDP-forming, beta subunit (SUCLG2), mRNA.	GO:0006099|GO:0006104|GO:0008152	GO:0005739|GO:0005759	GO:0004776|GO:0005524|GO:0016874	chr3	67507966	67508015	ACTCCTCATCCTCCCAGAATCTACCAGTTTATGGTAGAAAGATGGGAACC
ARL4A	7560615	0.0284447	down	-1.61462	2.87274	2.18155	10124	Homo sapiens ADP-ribosylation factor-like 4A (ARL4A), transcript variant 3, mRNA.	GO:0007264	GO:0005622|GO:0005634	GO:0000166|GO:0003924|GO:0005525	chr7	12696727	12696776	GTCCCATAGTAGTTCAGATCTGCTTAGATGTGACAGGCATTGAAGGCTGT
LOC645317	5270086	0.0393789	down	-1.61423	-1.07755	-1.7684	645317	PREDICTED: Homo sapiens similar to Coiled-coil-helix-coiled-coil-helix domain-containing protein 2 (HCV NS2 trans-regulated protein) (NS2TP), transcript variant 3 (LOC645317), mRNA.				chr1	15803612	15803661	AAGTCACTTAGCTCTTCGCTGGTTGTCACACGTCCGGAGGCCGAGCCGTC
MOSC1	3370327	0.00949059	down	-1.61251	2.13286	1.44355	64757	Homo sapiens MOCO sulphurase C-terminal domain containing 1 (MOSC1), mRNA.	GO:0055114	GO:0005743|GO:0005739	GO:0003824|GO:0030151|GO:0030170|GO:0003824|GO:0030151|GO:0030170|GO:0016491|GO:0030151|GO:0030170	chr1	219054033	219054082	GGACCCCTGGATCCTTGCCATTCCCCTCAGCTAATGACGGAGTGCTCCTT
SVIL	3140603	0.0340799	down	-1.6125	0.54216	-0.14714	6840	Homo sapiens supervillin (SVIL), transcript variant 1, mRNA.	GO:0007010|GO:0007519|GO:0051016	GO:0005634|GO:0005737|GO:0005886|GO:0015629|GO:0043034	GO:0005509|GO:0051015	chr10	29812426	29812475	GTTTCCTGCAGCATTAGGTATGACTTGTTCTGAGTACTGCTTCCGGTGCT
AGPAT2	5560102	0.0244303	down	-1.6086	-1.88672	-2.57253	10555	Homo sapiens 1-acylglycerol-3-phosphate O-acyltransferase 2 (lysophosphatidic acid acyltransferase, beta) (AGPAT2), transcript variant 2, mRNA.	GO:0006654|GO:0008152|GO:0008654|GO:0008152|GO:0008654	GO:0005783|GO:0005829|GO:0016020|GO:0016021|GO:0005783|GO:0016020	GO:0003841|GO:0003841|GO:0008415|GO:0016740|GO:0046027|GO:0003841|GO:0008415|GO:0016740	chr9	139567747	139567796	TGGGCTCCAGGGTCCAGCCCACAAGCTGCATCAGGCTCTCTGGGAGAGGA
RNASEL	110064	0.0359274	down	-1.60578	-0.68599	-1.36926	6041	Homo sapiens ribonuclease L (2',5'-oligoisoadenylate synthetase-dependent) (RNASEL), mRNA.	GO:0006397|GO:0006468	GO:0005575|GO:0005737|GO:0005739	GO:0000166|GO:0003723|GO:0004672|GO:0005524|GO:0008270|GO:0016787|GO:0016891|GO:0046872	chr1	182543027	182543076	GGTGCTAAGTCTGATGTTCTTTCCATGAATCATTGTGGTGGTTGAGATGG
IFI16	3870594	0.0376961	down	-1.6042	-3.39586	-4.0777	3428	Homo sapiens interferon, gamma-inducible protein 16 (IFI16), mRNA.	GO:0006350|GO:0006355|GO:0008283|GO:0009615|GO:0030099|GO:0030224|GO:0042771	GO:0005634|GO:0005634|GO:0005634|GO:0005654|GO:0005730|GO:0005730|GO:0005730|GO:0005737	GO:0003677|GO:0003690|GO:0005515|GO:0016564	chr1	157288195	157288244	CCTTTCACACTTGTGGCTGATGTGAATGCTGACCGAAACATGGAGATCCC
CRTAP	6770168	0.0283668	down	-1.60214	0.172152	-0.507852	10491	Homo sapiens cartilage associated protein (CRTAP), mRNA.		GO:0005576|GO:0005578		chr3	33164085	33164134	TCCCACTTTAGGGTGGCAGCCAGTAGGCCAAACTCCAAAGACCGTTGCTG
CNTN3	1660367	0.0405849	down	-1.59921	-0.685429	-1.36278	5067	Homo sapiens contactin 3 (plasmacytoma associated) (CNTN3), mRNA.	GO:0007155	GO:0005886|GO:0031225	GO:0005515	chr3	74399153	74399202	CCCACCATCTATCTGAGTGAGTCTGGCAGGCTTTTTAGTTCCTGAGTTAA
ALPL	6100356	0.0479201	down	-1.59751	1.08371	0.407885	249	Homo sapiens alkaline phosphatase, liver/bone/kidney (ALPL), transcript variant 1, mRNA.	GO:0008152|GO:0001501|GO:0001503|GO:0008152	GO:0005886|GO:0005737|GO:0005886|GO:0016021|GO:0031225	GO:0003824|GO:0004035|GO:0000287|GO:0004035|GO:0008270|GO:0016787	chr1	21777338	21777387	TCACACTCCTGGGCTCTGAACACACACGCCAGCTCCTCTCTGAAGCGACT
MEIS1	4040753	0.0468631	down	-1.59708	1.40165	0.726212	4211	Homo sapiens Meis homeobox 1 (MEIS1), mRNA.	GO:0006355|GO:0006355|GO:0007275	GO:0005634|GO:0005634|GO:0005667	GO:0003700|GO:0043565|GO:0003705|GO:0005515|GO:0043565	chr2	66652810	66652859	GTCTTAAGGAGACTGGTAGGAGGAGGCATGGAAACCAAAAGGCCGTGTGT
TNFRSF14	6520725	0.0291551	down	-1.59708	-2.76394	-3.43937	8764	Homo sapiens tumor necrosis factor receptor superfamily, member 14 (herpesvirus entry mediator) (TNFRSF14), mRNA.	GO:0006915|GO:0006955|GO:0007166|GO:0046642|GO:0050731|GO:0046642|GO:0050731	GO:0005737|GO:0005887|GO:0009897|GO:0016020|GO:0009897	GO:0004888|GO:0005031|GO:0005515|GO:0005515|GO:0005515|GO:0005515|GO:0005515|GO:0005515|GO:0005515|GO:0004872|GO:0005515	chr1	2487920	2487969	AGCCAAGGCTGGACTGGGTTGGCTGCAGTGTGGTGTTTAGTGGATACCAC
C1orf88	5420129	0.0306527	down	-1.5969	1.68578	1.01051	128344	Homo sapiens chromosome 1 open reading frame 88 (C1orf88), mRNA.				chr1	111696929	111696978	GCTTCAAGTTCTTAGGTCCCTTTGGAGGATATTGATGGGGGTGGAGGTGG
MGC42105	1740551	0.0153913	down	-1.59494	2.15165	1.47815	167359	Homo sapiens serine/threonine-protein kinase NIM1 (MGC42105), mRNA.				chr5	43280515	43280564	CCAAAGGAAGAAGGCTTTGGAAAGTGTCCCAGTCATGATGCTACCAGACC
AKR1C3	7210632	0.0449459	down	-1.59305	-3.94055	-4.61234	8644	Homo sapiens aldo-keto reductase family 1, member C3 (3-alpha hydroxysteroid dehydrogenase, type II) (AKR1C3), mRNA.	GO:0006693|GO:0055114	GO:0005622|GO:0005737	GO:0004033|GO:0016491|GO:0047017|GO:0047026|GO:0047045|GO:0047115|GO:0050327	chr10	5137829	5138610	GCCGGTGACTGGACATATCACCTCTACTTAAATCCGTCCTGTTTAGCGAC
GPER	520463	0.0164316	down	-1.58517	-1.63502	-2.29965	2852	Homo sapiens G protein-coupled estrogen receptor 1 (GPER), transcript variant 3, mRNA.	GO:0007165|GO:0007186|GO:0007165|GO:0007186	GO:0000139|GO:0005783|GO:0005789|GO:0005794|GO:0005886|GO:0005887|GO:0016020|GO:0016021	GO:0004872|GO:0045028|GO:0004872|GO:0045028	chr7	1099751	1099800	AATTGCACTCATGTGGACTGGGACCGTGCGAGCTGCCGTGTGGGTTAGTC
LOC100133609	780672	0.0096955	down	-1.58341	0.963398	0.300367	100133609	PREDICTED: Homo sapiens similar to membrane-associated ring finger (C3HC4) 3 (LOC100133609), mRNA.							TCCTTGCTGGGCCTCCATTCGGTCAAGAGGAACTCAAAGGAGACAGTTGT
OLFML2B	7150019	0.0153913	down	-1.58055	0.64907	-0.0113533	25903	Homo sapiens olfactomedin-like 2B (OLFML2B), mRNA.		GO:0005576|GO:0016020|GO:0031012	GO:0042803|GO:0050840	chr1	161953170	161953219	TGACCAGTAACCACCTTCCTTCAAGCCTTCAGCCCCTCCAGCTCCAAGTC
MARCH11	60731	0.0108422	down	-1.57927	1.71751	1.05826	441061	Homo sapiens membrane-associated ring finger (C3HC4) 11 (MARCH11), mRNA.	GO:0006511	GO:0016020|GO:0016021|GO:0030659|GO:0031410	GO:0008270|GO:0016874|GO:0046872	chr5	16179509	16179558	GTGGTTGCCATTGACAGCTCTGCGGAACAGAAACTTGGTCCACCCAACTC
TOM1L1	5720112	0.0184049	down	-1.57872	0.460671	-0.198086	10040	Homo sapiens target of myb1 (chicken)-like 1 (TOM1L1), mRNA.	GO:0006886|GO:0043162|GO:0006886	GO:0005622|GO:0005764|GO:0005768|GO:0005794|GO:0005829|GO:0010008|GO:0016020|GO:0005622	GO:0005515|GO:0017124|GO:0030295|GO:0043130|GO:0005515|GO:0030295	chr17	50382447	50392935	TACGAGGTAATGGAGTTTGATCCCTTAGCTCCTGCTGTCACTACAGAAGC
SPON1	3370162	0.0489844	down	-1.57672	1.38579	0.728858	10418	Homo sapiens spondin 1, extracellular matrix protein (SPON1), mRNA.	GO:0007155	GO:0005576|GO:0005578	GO:0005515	chr11	14244312	14244361	CAAGGACAAGCCACCCTAGTGTCTCATGTTTGTATTTGGTCCCAGTTGGG
DBT	4060768	0.00949059	down	-1.57467	0.326142	-0.32891	1629	Homo sapiens dihydrolipoamide branched chain transacylase E2 (DBT), nuclear gene encoding mitochondrial protein, mRNA.	GO:0008152|GO:0008152	GO:0005739|GO:0005739|GO:0005759|GO:0005947	GO:0005515|GO:0008415|GO:0016740|GO:0031405|GO:0005515|GO:0008415|GO:0016740|GO:0031405|GO:0043754	chr1	100659770	100659819	GCCCAGGAGTTCAAAGCTGTAGTGAGCTGTCATTGTGCCACTATCCTCCA
PRCP	6110386	0.0263414	down	-1.57368	0.243945	-0.410195	5547	Homo sapiens prolylcarboxypeptidase (angiotensinase C) (PRCP), transcript variant 1, mRNA.	GO:0006508|GO:0006508	GO:0005764	GO:0004180|GO:0008236|GO:0004185|GO:0008233|GO:0008236	chr11	82535584	82535633	CTGCAAGCAGAGATTTCTCTTTGGTTTTGAGGTTGAAGTGTCTTTGGCCC
PRODH	5860689	0.0451727	down	-1.57299	3.06338	2.40987	5625	Homo sapiens proline dehydrogenase (oxidase) 1 (PRODH), nuclear gene encoding mitochondrial protein, mRNA.	GO:0006537|GO:0006562|GO:0008631|GO:0055114|GO:0006537|GO:0006562	GO:0005575|GO:0005739|GO:0005743|GO:0005759|GO:0005743	GO:0003674|GO:0004657|GO:0016491|GO:0004657	chr22	17280464	17280513	GTGTGGGCCGAACCTGATACCTGCCTGGGACAGCCACTGGAAACTTTTGG
SULT1C4	4610593	0.0170447	down	-1.57272	1.51618	0.862918	27233	Homo sapiens sulfotransferase family, cytosolic, 1C, member 4 (SULT1C4), mRNA.				chr2	108370208	108370257	GGGCAGTGGGAGACTGGAAGAAACACTTCACCGTGGCTCAGAATGAGAGA
KIAA1147	1050082	0.00851102	down	-1.56968	2.31308	1.66261	57189	Homo sapiens KIAA1147 (KIAA1147), mRNA.				chr7	141356753	141356802	GACACTGCATAGATTTTGCCCTGAATACTGGTGTGCCCAGGTATGCCGTG
C9orf58	5420482	0.0247826	down	-1.56689	3.89321	3.24531	83543	Homo sapiens chromosome 9 open reading frame 58 (C9orf58), transcript variant 2, mRNA.			GO:0005509|GO:0005509|GO:0005509|GO:0005509	chr9	132987878	132987927	GCAGGAATTCTCCTTAAGGGAGGAGAGCAAGCAGGTGTGGCCCCAGCTTC
C20orf108	770561	0.0321223	down	-1.56519	-0.699885	-1.34622	116151	Homo sapiens chromosome 20 open reading frame 108 (C20orf108), mRNA.		GO:0016020|GO:0016021		chr20	54376846	54376895	GGGCTTAAATCTCAAACTTTGTTAGGAGTAACAGGAGCGTGCTGAGCGGG
FOXO4	4480575	0.0323483	down	-1.56392	-0.0304619	-0.67563	4303	Homo sapiens forkhead box O4 (FOXO4), mRNA.	GO:0000080|GO:0006355|GO:0006366|GO:0007049|GO:0007050|GO:0007095|GO:0007275|GO:0007519|GO:0008285|GO:0008286|GO:0016525|GO:0030154|GO:0045941|GO:0051151	GO:0005634|GO:0005737|GO:0005829	GO:0003700|GO:0008134|GO:0016563|GO:0019899|GO:0043565	chrX	70240007	70240056	GTGTCAGCGCCTGGCCTACCCAGATTGTATCATGTGCTAGATTGGAGTGG
GPM6B	5340465	0.0177809	down	-1.56353	5.88099	5.23619	2824	Homo sapiens glycoprotein M6B (GPM6B), transcript variant 4, mRNA.	GO:0007275|GO:0007399|GO:0030154	GO:0005634|GO:0005730|GO:0016020|GO:0016021	GO:0003674	chrX	13956696	13956745	CAGAAGCCCGGTCAGCGCACGTGCCCGCGAGACCTGCAAACTTGTGCCAC
SLC10A4	540541	0.032555	down	-1.56154	2.627	1.98403	201780	Homo sapiens solute carrier family 10 (sodium/bile acid cotransporter family), member 4 (SLC10A4), mRNA.	GO:0006811|GO:0006814	GO:0016020|GO:0016021	GO:0008508|GO:0015293|GO:0031402	chr4	48185248	48185297	GACCGGCACTATGTTAGGACCTGAACTGCTGGCAAGTATCCCTGCAGCTG
NPY	4880138	0.039061	down	-1.55784	0.987856	0.34831	4852	Homo sapiens neuropeptide Y (NPY), mRNA.	GO:0006816|GO:0006928|GO:0007187|GO:0007218|GO:0007268|GO:0007586|GO:0008217|GO:0008283|GO:0008343|GO:0032100	GO:0005576|GO:0005615|GO:0005623	GO:0001664|GO:0004930|GO:0005184|GO:0005246	chr7	24295713	24297845	CCCAGAACTCGGCTTGAAGACCCTGCAATGTGGTGATGGGAAATGAGACT
C1orf88	1820692	0.0153898	down	-1.55285	1.92132	1.2864	128344	Homo sapiens chromosome 1 open reading frame 88 (C1orf88), mRNA.				chr1	111696553	111696602	GATGAGTGTTACCTGGGGAAAGGGCTAGCAAGAGGTGAAGCCTCCTGGTC
C10orf104	7210300	0.0464456	down	-1.5527	0.0669681	-0.567814	119504	Homo sapiens chromosome 10 open reading frame 104 (C10orf104), mRNA.				chr10	73665448	73665497	GCAATCACTACCTTTCTCGTTTCATTTGTGTAACCATGCAGCATAGGCAC
LOC646858	7560619	0.0248377	down	-1.5472	0.930273	0.300611	646858	PREDICTED: Homo sapiens hypothetical protein LOC646858 (LOC646858), mRNA.				chr18	31115264	31115313	GGACTGGCCAAAACAAATCTGAGCCAACTATGGTCCATATCAGCTGACAC
EFNB3	2680070	0.025279	down	-1.54624	3.86519	3.23643	1949	Homo sapiens ephrin-B3 (EFNB3), mRNA.	GO:0007267|GO:0007275|GO:0007399|GO:0007628|GO:0016198|GO:0030154|GO:0044419|GO:0048013	GO:0005887|GO:0016020	GO:0005005|GO:0046875	chr17	7555177	7555226	GGTTGGCCACCTCAATCACCAGCCAAGATGGTTGCTTTGTCCACCAGAGG
AKNAD1	3130605	0.0201965	down	-1.54407	1.20297	0.576227	254268	Homo sapiens AKNA domain containing 1 (AKNAD1), mRNA.				chr1	109358775	109358824	GCACAGAGGTGGAGGAATCGACTGAAATACTAGTTCAACGCTAGGCTACC
KIAA1274	2100201	0.0402052	down	-1.54386	0.400695	-0.225848	27143	Homo sapiens KIAA1274 (KIAA1274), mRNA.				chr10	71997954	71998003	TGCAGACAAGGTCTAGATGCGGAGTCAGAGATGGGACTGAATGGGGAGGG
LOC654053	780079	0.0280634	down	-1.54245	1.08707	0.461845	654053	PREDICTED: Homo sapiens similar to hypothetical LOC389634 (LOC654053), mRNA.							TGGGATTCGGCCTCTGGAAAGTGGTGGTAGTTCCAGATTTATGTGAATGT
CAV2	620360	0.0224334	down	-1.54198	-2.72729	-3.35207	858	Homo sapiens caveolin 2 (CAV2), transcript variant 1, mRNA.	GO:0006906|GO:0016050|GO:0048278	GO:0000139|GO:0005794|GO:0016020|GO:0016021|GO:0000139|GO:0005794|GO:0005886|GO:0005887|GO:0005901|GO:0030133|GO:0048471	GO:0005515|GO:0042803	chr7	115935309	115935358	CTGCCCTAGGCCATTGCAGCATCCTTAGATGGGACGCATAATCATTACCT
B4GALT4	2000646	0.0100785	down	-1.54191	-0.807927	-1.43265	8702	Homo sapiens UDP-Gal:betaGlcNAc beta 1,4- galactosyltransferase, polypeptide 4 (B4GALT4), transcript variant 2, mRNA.	GO:0005975|GO:0006643	GO:0005794|GO:0016020|GO:0016021	GO:0003945|GO:0008378|GO:0016757|GO:0030145|GO:0046872	chr3	120413578	120413627	CTGTGAAGTGGTGGTGTCAGGTGAGAAGGCGTCCACAAAAGAGGGGAGAA
INHBB	50446	0.0195739	down	-1.54117	1.40602	0.782001	3625	Homo sapiens inhibin, beta B (activin AB beta polypeptide) (INHBB), mRNA.	GO:0001541|GO:0006952|GO:0009605|GO:0030154|GO:0040007|GO:0046881|GO:0046882|GO:0048178	GO:0005576	GO:0005125|GO:0005179|GO:0008083|GO:0042803|GO:0046789	chr2	120825124	120825173	CCGCCCGCATAGCACTTGCAGACCTGCCTGAACGCACATGACATAGCACT
ZFP36L1	830164	0.0498355	down	-1.53879	-1.37454	-1.99634	677	Homo sapiens zinc finger protein 36, C3H type-like 1 (ZFP36L1), mRNA.	GO:0000288|GO:0001570|GO:0006417|GO:0043488	GO:0005634|GO:0005737	GO:0003700|GO:0003729|GO:0005515|GO:0008270|GO:0046872	chr14	69254536	69254585	TGGATTCCAGGTCTGGAGTTTTCCAATGTTAATGTAAACAGAACTGGCAC
C1orf158	6100754	0.0153913	down	-1.53841	1.57581	0.954366	93190	Homo sapiens chromosome 1 open reading frame 158 (C1orf158), mRNA.				chr1	12743506	12743555	AGCTGGAGACCACAGCATCACTGGACTTGCCAGACAACAAGTGGCGCAGA
BOC	7510113	0.00949059	down	-1.53797	1.0758	0.454776	91653	Homo sapiens Boc homolog (mouse) (BOC), mRNA.	GO:0007155|GO:0045663	GO:0005886|GO:0016021	GO:0005515	chr3	113005990	113006039	TCTGCAGTGGCAGGCGAGGCTGCAGGAGGCCCACAGATAAGCTGGCAAGA
BCHE	2030414	0.0270745	down	-1.53675	3.89455	3.27467	590	Homo sapiens butyrylcholinesterase (BCHE), mRNA.	GO:0050783	GO:0005576|GO:0005641|GO:0005783|GO:0016020|GO:0005641|GO:0005783|GO:0016020	GO:0001540|GO:0004104|GO:0016787|GO:0019899|GO:0004091	chr3	166973519	166973568	CCCCCCAAAATTATCAGTGCTCTGCTTTTAGTCACGTGTATTTTCATTAC
WDR16	6040500	0.0327464	down	-1.53666	2.53013	1.91033	146845	Homo sapiens WD repeat domain 16 (WDR16), transcript variant 2, mRNA.		GO:0005737	GO:0005515	chr17	9485798	9485847	GGGGTGGGACACAGTGGCAACATCACACGCATCCGCATAAGTCCAGGAAA
REC8	70541	0.00443975	down	-1.53568	0.879926	0.261044	9985	Homo sapiens REC8 homolog (yeast) (REC8), transcript variant 1, mRNA.	GO:0007062|GO:0007126|GO:0007131|GO:0007283	GO:0000228|GO:0000800|GO:0005634	GO:0005515	chr14	23719110	23719159	GCCTCCTGATCCAGCCGGGGCCCAGATTCCACTGAGGTTAGAGTCCATTT
CLEC2D	5490341	0.048731	down	-1.53485	-0.519069	-1.13717	29121	Homo sapiens C-type lectin domain family 2, member D (CLEC2D), transcript variant 1, mRNA.	GO:0007166	GO:0005624|GO:0005886|GO:0005887	GO:0004888|GO:0005488|GO:0005529	chr12	9739126	9739175	CTTGAGACAAGAACAGTATGGGGCTCCCTGGTGTGATTCCGTCCTGCGCG
CLPX	6760050	0.00238896	down	-1.52756	-0.431915	-1.04314	10845	Homo sapiens ClpX caseinolytic peptidase X homolog (E. coli) (CLPX), mRNA.	GO:0006457|GO:0015031	GO:0005739|GO:0005743	GO:0000166|GO:0005515|GO:0005524|GO:0008270|GO:0042623|GO:0046872	chr15	65443145	65443194	GATGGCCCCGCCAAGCAGATGCTGCAAACAGCTAAACTGTCATATTGCTG
LRTOMT	1300437	0.0263414	down	-1.52563	1.79091	1.18151	220074	Homo sapiens leucine rich transmembrane and 0-methyltransferase domain containing (LRTOMT), mRNA.				chr11	71485280	71485329	TGCTGGCCTGGGACACTGGAGACGTGGGTTTACCACACAGCCTTGGGAAA
UNCX	3830609	0.0184049	down	-1.52516	0.975405	0.366442	340260	Homo sapiens UNC homeobox (UNCX), mRNA.	GO:0006350|GO:0006355|GO:0007275|GO:0007399|GO:0030154	GO:0005634	GO:0003700|GO:0043565	chr7	1239768	1239817	GAGAAGGCGTTCAACGAGAGCCACTATCCCGACGTGTTCATGCGCGAGGC
ALDH6A1	5820373	0.0474857	down	-1.52457	1.1549	0.546497	4329	Homo sapiens aldehyde dehydrogenase 6 family, member A1 (ALDH6A1), nuclear gene encoding mitochondrial protein, mRNA.	GO:0006573|GO:0019859|GO:0055114	GO:0005739	GO:0000062|GO:0004491|GO:0016491|GO:0018478	chr14	74527348	74527397	GAAGATGCTACTCTTTCCTCACCTGCTGTTGTCATGCCTACCATGGGCCG
ACSF2	2810253	0.008218	down	-1.52268	-0.357111	-0.963722	80221	Homo sapiens acyl-CoA synthetase family member 2 (ACSF2), mRNA.	GO:0006629|GO:0006631|GO:0008152	GO:0005739	GO:0016874	chr17	45907028	45907077	GTCAAGGAATTGACTGAACGAACTAAGAGCTCCTGGATGGGTCCGGGAAC
TMLHE	5890168	0.0114832	down	-1.51948	1.24475	0.641169	55217	PREDICTED: Homo sapiens trimethyllysine hydroxylase, epsilon (TMLHE), mRNA.	GO:0045329|GO:0055114	GO:0005739|GO:0005759|GO:0005759	GO:0005506|GO:0009055|GO:0016491|GO:0016702|GO:0031418|GO:0050353				TGGTGGAATGGGATCTGTAGGGTCAGGAACACAGCACCTAACACAGTGCC
COL24A1	6840639	0.0284447	down	-1.51719	1.99044	1.38904	255631	Homo sapiens collagen, type XXIV, alpha 1 (COL24A1), mRNA.	GO:0007155	GO:0005581	GO:0005201	chr1	85968304	85968353	GCCGGTGATACACTACCTCTTACGTGTTGCCTCTTTGTGTTGCTTGGTGC
ADORA2A	7560440	0.0492723	down	-1.51715	1.57694	0.975574	135	Homo sapiens adenosine A2a receptor (ADORA2A), mRNA.	GO:0006171|GO:0006909|GO:0006915|GO:0006954|GO:0006968|GO:0007165|GO:0007169|GO:0007186|GO:0007188|GO:0007190|GO:0007267|GO:0007417|GO:0007596|GO:0007600|GO:0008015	GO:0005624|GO:0005886|GO:0005886|GO:0005887	GO:0001609|GO:0004872	chr22	23167955	23168004	TTACCTTTCACTCTCTGGCTGCTGGGTCTGCCGTCGGTCCTGCTGCTAAC
TSR2	6250390	0.0451451	down	-1.51544	1.123	0.523262	90121	Homo sapiens TSR2, 20S rRNA accumulation, homolog (S. cerevisiae) (TSR2), mRNA.	GO:0006364			chrX	54471581	54471630	GGAATTCGAAGACCTTGGCTAGGTGGTGAGCTTGGAAGAGCTGGGCTTTG
BMF	110280	0.0325848	down	-1.51414	0.702134	0.103635	90427	Homo sapiens Bcl2 modifying factor (BMF), transcript variant 2, mRNA.	GO:0042981	GO:0005737|GO:0005829|GO:0005886|GO:0016459|GO:0016459	GO:0005515|GO:0005515|GO:0005515	chr15	40380330	40380379	TCCCTGCTCTGGGAGCATTGCTAGCCTTCTACCCCATCCCTGGATCCACA
RIN2	6590445	0.0381179	down	-1.51338	-1.9938	-2.59158	54453	Homo sapiens Ras and Rab interactor 2 (RIN2), mRNA.	GO:0006897|GO:0007165|GO:0007264|GO:0007165	GO:0005575|GO:0005737	GO:0005083|GO:0005096|GO:0005515|GO:0017112|GO:0005515	chr20	19930636	19930685	CCAGTTTGCAGGTGCACAAACTATGAGGGTCTTGTATCCACGTAACACAG
PECR	6200255	0.0314821	down	-1.51252	0.402936	-0.194017	55825	Homo sapiens peroxisomal trans-2-enoyl-CoA reductase (PECR), mRNA.	GO:0006633|GO:0042981|GO:0055114	GO:0005739|GO:0005777	GO:0005488|GO:0016491|GO:0019166	chr2	216612179	216612228	GGTGTCCTCCATCCCCCAGTGCCTTCACATCTTGAGGATATGCTTCTGTA
MEIS2	20358	0.0121768	down	-1.50754	-2.26283	-2.85503	4212	Homo sapiens Meis homeobox 2 (MEIS2), transcript variant g, mRNA.	GO:0000122|GO:0001654|GO:0006355|GO:0006355|GO:0006355|GO:0006355	GO:0005634|GO:0005634|GO:0005730|GO:0005737|GO:0005634|GO:0005634|GO:0005634|GO:0005730|GO:0005737	GO:0003700|GO:0003704|GO:0003714|GO:0043565|GO:0003700|GO:0043565|GO:0003700|GO:0043565|GO:0003700|GO:0043565	chr15	37183813	37183862	TCGAACTCCAGCTTCAAGAATGTGTTTTCATGCCCGGCCTTTGTTCCTCC
CRB1	50603	0.0130208	down	-1.50663	1.43794	0.846611	23418	Homo sapiens crumbs homolog 1 (Drosophila) (CRB1), mRNA.	GO:0007163|GO:0007267|GO:0007601|GO:0050896	GO:0005576|GO:0005886|GO:0016021|GO:0016324	GO:0005509|GO:0005509	chr1	195713516	195713565	ACCTCCAACAAAAGGGCAACTCAGGGAACCTACAGCCCCAGCCGTCAGGA
FAH	4060471	0.0167497	down	-1.50397	-0.871775	-1.46055	2184	Homo sapiens fumarylacetoacetate hydrolase (fumarylacetoacetase) (FAH), mRNA.	GO:0006527|GO:0006559|GO:0006572|GO:0008152|GO:0009072	GO:0005829	GO:0000287|GO:0004334|GO:0004334|GO:0005509|GO:0016787	chr15	78260453	78260502	CGGCTCCATGTTGGAACTGTCGTGGAAGGGAACGAAGCCCATAGACCTGG
LOC100130291	2760100	0.0179086	down	-1.50261	-0.511538	-1.09901	100130291	PREDICTED: Homo sapiens misc_RNA (LOC100130291), miscRNA.				chr12	6865100	6865149	GGATGCCCTGTGTAGATCATCATTCAGTGCCACAAATTGAAAGCTTCCAC
FAM171B	6060026	0.0164316	down	-1.50215	1.04568	0.45866	165215	Homo sapiens family with sequence similarity 171, member B (FAM171B), mRNA.		GO:0016020|GO:0016021		chr2	187336378	187336427	GGCAAGAAGCTACTTGGTCATTAGAGAGGGAGACACCAGCTCTTTGGTTG
UBXN1	6290068	0.0460767	down	-1.50174	0.175995	-0.410641	51035	Homo sapiens UBX domain protein 1 (UBXN1), mRNA.				chr11	62444064	62444113	CAGGACTCGTGCCTTCTGCTGTTCTCATTGTGGCCAAGAAATGTCCCAGC
ADK	1030241	0.00768846	down	-1.5017	0.089558	-0.497043	132	Homo sapiens adenosine kinase (ADK), transcript variant ADK-short, mRNA.	GO:0006166|GO:0009156		GO:0000287|GO:0004001|GO:0016301|GO:0016740	chr10	76019072	76030182	CCACTGATGGAAGAGCTGAAAACACAAGCCCAGGAGTGCAGACACTGCCC
COBLL1	5080601	0.0258692	down	-1.50116	0.429681	-0.156399	22837	Homo sapiens COBL-like 1 (COBLL1), mRNA.				chr2	165541412	165541461	TGTCGGCTTACAGCTCTTCCGGAGTCTAGAGCCTGTTGGTGTTCTGTCCC
PPP1R1A	2750563	0.0271931	down	-1.50025	0.917376	0.332169	5502	Homo sapiens protein phosphatase 1, regulatory (inhibitor) subunit 1A (PPP1R1A), mRNA.	GO:0005975|GO:0005977|GO:0007165		GO:0004865|GO:0005515	chr12	53262029	53262078	GATCCCAGACACAGAAGTGGAGTCAAGGCTGGGCACCTCTGGGACAGCAA
LOC100129268	1500092	0.0267093	down	-1.49776	4.29309	3.71029	100129268	PREDICTED: Homo sapiens hypothetical protein LOC100129268 (LOC100129268), mRNA.							CCAGCTGAGCCTTGGATCAACTCTGCTAGATACCACATCTCTAGGGCCCC
SEMA4B	5080280	0.0351523	down	-1.49772	1.56522	0.982455	10509	Homo sapiens sema domain, immunoglobulin domain (Ig), transmembrane domain (TM) and short cytoplasmic domain, (semaphorin) 4B (SEMA4B), transcript variant 2, mRNA.	GO:0007275|GO:0007399|GO:0030154|GO:0007275	GO:0016020|GO:0016021|GO:0016020|GO:0016021	GO:0004872|GO:0004872	chr15	88573628	88573677	TGCCTTCCTCCGTTGTTGCGTGAGAACCCGTGTGCCCCTTCCCACCATAT
ENPP2	840678	0.0467822	down	-1.49234	0.0655699	-0.512003	5168	Homo sapiens ectonucleotide pyrophosphatase/phosphodiesterase 2 (ENPP2), transcript variant 2, mRNA.	GO:0008152|GO:0006796|GO:0006928|GO:0006935|GO:0007186|GO:0008152|GO:0016042	GO:0005576|GO:0005886|GO:0005887	GO:0003676|GO:0003824|GO:0004519|GO:0003676|GO:0004519|GO:0004528|GO:0004551|GO:0008134|GO:0016787|GO:0046872|GO:0047391	chr8	120644354	120644403	CCGAAAGACCAGCCGCAGCTACCCAGAAATCCTGACACTCAAGACATACC
WDR16	1570487	0.027005	down	-1.49178	2.26664	1.68961	146845	Homo sapiens WD repeat domain 16 (WDR16), transcript variant 2, mRNA.		GO:0005737	GO:0005515	chr17	9485792	9485841	CACGTTGGGGTGGGACACAGTGGCAACATCACACGCATCCGCATAAGTCC
OLFM1	3800204	0.00851102	down	-1.49016	-1.57512	-2.15059	10439	Homo sapiens olfactomedin 1 (OLFM1), transcript variant 2, mRNA.	GO:0007275|GO:0007399	GO:0005783|GO:0005788|GO:0016020|GO:0016020	GO:0005515	chr9	137129482	137129531	GACTGAAGAAGCAGTCCACTCCCATGTAACCATGAAAGAGAGCCAGAGAG
ZNF626	1820082	0.0260886	down	-1.48844	1.387	0.813198	199777	Homo sapiens zinc finger protein 626 (ZNF626), transcript variant 1, mRNA.	GO:0006355|GO:0006350|GO:0006355	GO:0005622|GO:0005622|GO:0005634	GO:0003676|GO:0003677|GO:0008270|GO:0046872	chr19	20802988	20803037	ATGGCTTATGGCTCGGATTCTCCCCAGAATCCGTGTATTAAAGCACAGGC
ABAT	1230592	0.0162414	down	-1.4876	4.57068	3.99769	18	Homo sapiens 4-aminobutyrate aminotransferase (ABAT), nuclear gene encoding mitochondrial protein, transcript variant 2, mRNA.	GO:0007610|GO:0009450|GO:0042135|GO:0048148	GO:0005739|GO:0005759|GO:0032144	GO:0003867|GO:0016740|GO:0030170|GO:0032145|GO:0042803|GO:0047298	chr16	8785405	8785454	AACTCAGCAGAAGCTGGTAAAAACATGGGGAGCCCGGAGGACAGGCTGCT
C14orf93	4610484	0.018995	down	-1.48667	-0.14319	-0.715279	60686	Homo sapiens chromosome 14 open reading frame 93 (C14orf93), mRNA.		GO:0005576|GO:0005634|GO:0005886		chr14	22526305	22526354	CACCTGGCTCCCCATCTTTTGACCAACCCCACAAAACCTGCTGTCCTGAC
SLC2A12	1660161	0.0178276	down	-1.48495	2.70362	2.1332	154091	Homo sapiens solute carrier family 2 (facilitated glucose transporter), member 12 (SLC2A12), mRNA.	GO:0008643|GO:0055085	GO:0005737|GO:0012505|GO:0016020|GO:0016021	GO:0005215|GO:0005351|GO:0022891	chr6	134353831	134353880	ACACACAAGTGGTCTGGACATGAGGGTACAGTTTCTGCCTACCAAGACAC
NOVA1	2630717	0.0381179	down	-1.48334	3.59361	3.02476	4857	Homo sapiens neuro-oncological ventral antigen 1 (NOVA1), transcript variant 1, mRNA.	GO:0000398|GO:0007268|GO:0007626|GO:0008380	GO:0005634|GO:0005634|GO:0005730	GO:0003729|GO:0005515	chr14	26949191	26949240	CAGAACCAGTCAGCATTCTACAACCCCAGACCACCGTTAATCCAGATCGC
FOXP1	2760224	0.0236534	down	-1.48212	-0.133116	-0.700774	27086	Homo sapiens forkhead box P1 (FOXP1), transcript variant 1, mRNA.	GO:0000122|GO:0002053|GO:0002329|GO:0002639|GO:0006355|GO:0007507|GO:0007519|GO:0009790|GO:0016481|GO:0030324|GO:0033152|GO:0048745|GO:0050679|GO:0055007|GO:0000122|GO:0002053|GO:0002329|GO:0002639|GO:0006355|GO:0007507|GO:0007519|GO:0009790|GO:0016481|GO:0030324|GO:0033152|GO:0048745|GO:0050679|GO:0055007	GO:0005622|GO:0005634|GO:0005730|GO:0005622|GO:0005634	GO:0003705|GO:0008270|GO:0016566|GO:0042803|GO:0043565|GO:0046872|GO:0046982|GO:0003705|GO:0008270|GO:0016566|GO:0042803|GO:0043565|GO:0046982	chr3	71089415	71089464	CGATGTGTCTGTGTGAATCTTTGTCTTTTTTGGGGGAGGGCAGAGGGCGG
HIBADH	2480136	0.0265439	down	-1.4807	-1.36552	-1.9318	11112	Homo sapiens 3-hydroxyisobutyrate dehydrogenase (HIBADH), mRNA.	GO:0006098|GO:0006573|GO:0055114	GO:0005739	GO:0004616|GO:0005488|GO:0008442|GO:0016491|GO:0051287	chr7	27565919	27565968	TGGACTCCGTCACAATATGGTAGGATATCCCTCACCAACTCCCGACACTC
PARP9	3140707	0.0153913	down	-1.4805	-0.645697	-1.21179	83666	Homo sapiens poly (ADP-ribose) polymerase family, member 9 (PARP9), mRNA.	GO:0016477	GO:0005634	GO:0003674|GO:0003950|GO:0016740	chr3	123729671	123729720	CTTGGGGTTGGGGTAGGTAGATACCAAATGAAACACTTTCAGGACCTTCC
ABAT	1110025	0.031533	down	-1.47884	1.64524	1.08077	18	Homo sapiens 4-aminobutyrate aminotransferase (ABAT), nuclear gene encoding mitochondrial protein, transcript variant 1, mRNA.	GO:0007610|GO:0009450|GO:0042135|GO:0048148	GO:0005739|GO:0005759|GO:0032144	GO:0003867|GO:0016740|GO:0030170|GO:0032145|GO:0042803|GO:0047298	chr16	8675979	8676028	AGACACCCAGCGCTGCCGGAACTCGGGGCGCGCATCCCGCAAGTCGGAAC
EIF2C1	1710102	0.0140669	down	-1.47843	1.14561	0.581538	26523	Homo sapiens eukaryotic translation initiation factor 2C, 1 (EIF2C1), mRNA.	GO:0006412|GO:0006446|GO:0031047	GO:0005850	GO:0003676|GO:0003743|GO:0005515|GO:0003676|GO:0003743	chr1	36162240	36162289	TCCCTCTCAAGTCCAGCATGGATGGGGAAATGTCTCTGGATCCCCACAGC
PRPF38A	4260184	0.030165	down	-1.4779	1.37156	0.808014	84950	Homo sapiens PRP38 pre-mRNA processing factor 38 (yeast) domain containing A (PRPF38A), mRNA.	GO:0006397|GO:0008380	GO:0005634|GO:0005681		chr1	52656274	52656323	GACTTCTGCAACTGTAGTCCCAGCAGGAACTGTGAAGACCAGCTGCCCTG
KLF15	2570577	0.0399582	down	-1.47569	0.571152	0.00976483	28999	Homo sapiens Kruppel-like factor 15 (KLF15), mRNA.	GO:0006350|GO:0015758|GO:0045893	GO:0005622|GO:0005634	GO:0003700|GO:0005515|GO:0008270|GO:0046872	chr3	127544501	127544550	CGTCCCCTCCTCCGGTTTCCCAGACAAATCCAGACACCAGCCTTTAGGGT
TRIB3	1990630	0.0326297	down	-1.47138	-1.83289	-2.39006	57761	Homo sapiens tribbles homolog 3 (Drosophila) (TRIB3), mRNA.	GO:0006350|GO:0006355|GO:0006468|GO:0006469|GO:0006915|GO:0006950|GO:0043405|GO:0006468	GO:0005634|GO:0005634	GO:0003714|GO:0004672|GO:0004860|GO:0005515|GO:0005515|GO:0005524|GO:0019901|GO:0019901|GO:0019901|GO:0019901|GO:0003714|GO:0004672|GO:0005515|GO:0005524	chr20	326009	326058	CATGGGGCTTCTGACCTGAGCACCAAGGTTGAGGGACAGGATTAGGCAGG
GRIN3B	2640168	0.0399454	down	-1.47046	1.82433	1.26806	116444	Homo sapiens glutamate receptor, ionotropic, N-methyl-D-aspartate 3B (GRIN3B), mRNA.	GO:0006811|GO:0051205|GO:0051924|GO:0006811|GO:0051205|GO:0051924	GO:0005886|GO:0016021|GO:0017146|GO:0017146|GO:0030054|GO:0043025|GO:0045202|GO:0045211|GO:0016021|GO:0017146|GO:0030054|GO:0043025|GO:0045202|GO:0045211	GO:0000287|GO:0004872|GO:0004970|GO:0005216|GO:0005234|GO:0005262|GO:0005509|GO:0004872|GO:0004970|GO:0005216|GO:0005234|GO:0005262	chr19	960586	960635	GGGGAGCCAGGAATGAGGCGGCAGCCGGGCCGTTTGGGCTCAAGACACAC
ACAA2	1450093	0.018485	down	-1.46953	-0.37217	-0.927529	10449	Homo sapiens acetyl-Coenzyme A acyltransferase 2 (mitochondrial 3-oxoacyl-Coenzyme A thiolase) (ACAA2), nuclear gene encoding mitochondrial protein, mRNA.	GO:0008152|GO:0006629|GO:0006631|GO:0006695|GO:0008152	GO:0005739|GO:0005743	GO:0003824|GO:0003988|GO:0008415|GO:0016740	chr18	45564119	45564168	AGGCCACAGTAAAACAAGTGACCTTCAGAGCAGCTGCCACAACTGGCCAT
HNMT	7100121	0.0414418	down	-1.46904	0.448063	-0.106809	3176	Homo sapiens histamine N-methyltransferase (HNMT), transcript variant 1, mRNA.	GO:0007585	GO:0005737	GO:0008168|GO:0016740|GO:0008170|GO:0016740|GO:0008168|GO:0016740|GO:0046539	chr2	138490222	138490271	TGTTGTGGATCTCTCAGTGTTTAACATGGTGCCTTGCATATGGTAAATGC
SIRT5	1580224	0.0212962	down	-1.46885	0.0456708	-0.509015	23408	Homo sapiens sirtuin (silent mating type information regulation 2 homolog) 5 (S. cerevisiae) (SIRT5), transcript variant 1, mRNA.	GO:0006342|GO:0006355|GO:0006471|GO:0006476	GO:0005677	GO:0003677|GO:0003950|GO:0008270|GO:0016787|GO:0017136|GO:0046872|GO:0051287	chr6	13720119	13720168	GGCCACACGCAGAGGAGAAATGGTCTTATGGGTGGTGAGCTGAGTACTGA
SLC9A3R1	2450452	0.0100785	down	-1.4662	1.28591	0.733829	9368	Homo sapiens solute carrier family 9 (sodium/hydrogen exchanger), member 3 regulator 1 (SLC9A3R1), mRNA.	GO:0006461|GO:0016055|GO:0030643|GO:0032415	GO:0012505|GO:0015629|GO:0016020|GO:0016324|GO:0042995	GO:0005515|GO:0005515|GO:0030165|GO:0031698	chr17	70276941	70276990	GGCCTCAGCCTTAAACTTTTGTTCCTACTCCCACCCTCAGCGAACTGGGC
LOC100129365	3780070	0.0326297	down	-1.46617	1.24784	0.695794	100129365	PREDICTED: Homo sapiens hypothetical protein LOC100129365 (LOC100129365), mRNA.							GTGTCCCTTAAGCAGAGTTCTGGGAAGACGTCGTGGGGAGAACCTAGGAG
BCL11A	3170440	0.0153465	down	-1.46515	3.56878	3.01773	53335	Homo sapiens B-cell CLL/lymphoma 11A (zinc finger protein) (BCL11A), transcript variant 1, mRNA.	GO:0006350|GO:0006355|GO:0030097	GO:0005622|GO:0005634|GO:0005737	GO:0003676|GO:0008270|GO:0046872	chr2	60537857	60537906	GGCAGTTGTCTGCATTAACCTGTTCATACACCCATTTTGTCCCTTTATTG
C7orf10	2470102	0.0254564	down	-1.46021	-0.605007	-1.15118	79783	Homo sapiens chromosome 7 open reading frame 10 (C7orf10), mRNA.	GO:0008152|GO:0008152		GO:0016740|GO:0003824	chr7	40322934	40356362	CGATCCGAATACACTGGCAAAGGCAACACTTTGCTTGGACCCTTCTCCCC
MID1IP1	6580121	0.0418509	down	-1.46003	-0.775613	-1.32161	58526	Homo sapiens MID1 interacting protein 1 (gastrulation specific G12 homolog (zebrafish)) (MID1IP1), mRNA.	GO:0007026	GO:0005634|GO:0005737|GO:0005874	GO:0008022	chrX	38550401	38550450	CCCCAGTGTGTATAAGCTGGCATTTCGCCAGCTTGTACGTAGCTTGCCAC
RSPH3	2650678	0.0269415	down	-1.45985	-0.0875599	-0.633379	83861	Homo sapiens radial spoke 3 homolog (Chlamydomonas) (RSPH3), mRNA.				chr6	159318478	159318527	CAACAGCCAAGTCAGCAAGCAATCAGGTAATGATGTGCGAGTCCCCTCAG
RAB3IP	1410603	0.0436364	down	-1.45973	1.56041	1.01471	117177	Homo sapiens RAB3A interacting protein (rabin3) (RAB3IP), transcript variant A, mRNA.	GO:0006893|GO:0015031|GO:0033365|GO:0042384	GO:0005634|GO:0005737|GO:0005813|GO:0005829|GO:0005932	GO:0005085|GO:0005515|GO:0005515|GO:0005515	chr12	68459110	68459159	CGAGATTCCGTGGGCGTAGGACCCTCTGAGCCAGGTGTGGGATATAGTCT
CMTM4	2230630	0.0233424	down	-1.45887	1.26581	0.720954	146223	Homo sapiens CKLF-like MARVEL transmembrane domain containing 4 (CMTM4), transcript variant 2, mRNA.	GO:0006935	GO:0005615|GO:0016020|GO:0016021	GO:0005125	chr16	66648943	66648992	TTATGTGTTTGGTTTTTCAGCTGACGTGGAAGCCCTGGGTGGGCGTCCCC
LOC731954	6580019	0.0439724	down	-1.45764	0.539237	-0.00439533	731954	PREDICTED: Homo sapiens similar to supervillin (LOC731954), mRNA.							GAGTAGGGAGACGCCAGAGGAGCCTCACGGTCATGTCCAACACCACCGCA
C11orf54	3360370	0.0355268	down	-1.45689	0.853211	0.31032	28970	Homo sapiens chromosome 11 open reading frame 54 (C11orf54), mRNA.		GO:0005634	GO:0008270|GO:0016787|GO:0046872	chr11	93135218	93135267	GAACAAGGTGGCAGGTGGGGAGCCCTTTACCCTTCTGGTGAAGTTAAACC
LOC729992	2100577	0.0323483	down	-1.4566	0.146643	-0.395962	729992	PREDICTED: Homo sapiens misc_RNA (LOC729992), miscRNA.							TGTTCTGCACACCGAGGAAATGTGCTTCCTGAGGGAGTGGGTGGAGAGCC
ZCRB1	1990639	0.0291683	down	-1.45568	0.665201	0.12351	85437	Homo sapiens zinc finger CCHC-type and RNA binding motif 1 (ZCRB1), mRNA.	GO:0006397|GO:0008380	GO:0005634|GO:0005689	GO:0000166|GO:0003723|GO:0008270|GO:0046872	chr12	42706048	42706097	TCTTCCCATTCTGTCTGCAGGTGGGTATATGGTAATGGGATTAGAGAGCC
FHL1	4640446	0.0323864	down	-1.45415	0.0676524	-0.472528	2273	Homo sapiens four and a half LIM domains 1 (FHL1), mRNA.	GO:0007275|GO:0007517|GO:0009887|GO:0016049|GO:0030154	GO:0005575|GO:0005634|GO:0005737	GO:0008270|GO:0046872|GO:0008270|GO:0046872|GO:0008270|GO:0046872|GO:0008270|GO:0046872|GO:0008270|GO:0046872|GO:0008270|GO:0046872|GO:0003674|GO:0008270|GO:0046872	chrX	135120766	135120815	CTAGAGGGGGAGTTGAGCAGGCGCCAGGGCTGTCATCAACATGGATATGA
VCAM1	2900390	0.0347115	down	-1.4531	4.67268	4.13355	7412	Homo sapiens vascular cell adhesion molecule 1 (VCAM1), transcript variant 1, mRNA.	GO:0007157|GO:0022614|GO:0030183|GO:0042102|GO:0044419|GO:0050901	GO:0005615|GO:0005902|GO:0009897|GO:0016020|GO:0016021|GO:0030175|GO:0045177	GO:0005178|GO:0005515	chr1	100977059	100977108	TTCACGAAGTTTGTTCATCAGACTCCTGTGCAACTTTCCCAATGTGGCCT
EPHX2	6960397	0.0100246	down	-1.45266	1.73098	1.19229	2053	Homo sapiens epoxide hydrolase 2, cytoplasmic (EPHX2), mRNA.	GO:0006800|GO:0006805|GO:0006874|GO:0006954|GO:0008152|GO:0008217|GO:0009636|GO:0017144|GO:0019439|GO:0045909	GO:0005625|GO:0005737|GO:0005777|GO:0005829	GO:0000287|GO:0004301|GO:0016787|GO:0042803	chr8	27402076	27402125	CCTTCCACCTGCTGGGGCACCATTCTTAGTATACAGAGGTGGCCTTACAC
SRR	360463	0.00764478	down	-1.45201	0.742433	0.204384	63826	Homo sapiens serine racemase (SRR), mRNA.	GO:0006563|GO:0008152		GO:0016853|GO:0018114|GO:0030170|GO:0030378	chr17	2174950	2174999	ACCCATGCAAGAGCCTGGTTTGTCATCCCTGCCCTAGCCCAATCTGAGGC
PEX7	4040017	0.0267093	down	-1.45145	-0.387379	-0.924877	5191	Homo sapiens peroxisomal biogenesis factor 7 (PEX7), mRNA.	GO:0001764|GO:0001958|GO:0006635|GO:0016558|GO:0007601|GO:0007605|GO:0008611|GO:0008611|GO:0015031|GO:0016558|GO:0050896	GO:0005829|GO:0005737|GO:0005777	GO:0005053	chr6	137261046	137276311	GACTTCAGTCTTCAGAGCCCCACTCAGGTGGCTGACTGTTCTTGGGATGA
DIS3L	4280300	0.00768846	down	-1.45106	0.11803	-0.419075	115752	Homo sapiens DIS3 mitotic control homolog (S. cerevisiae)-like (DIS3L), mRNA.			GO:0003723|GO:0004527|GO:0004540|GO:0016787	chr15	64413202	64413251	CAGTTTTCAGTAATGAGTGGACAGTAAGTGGTGGCTCTGCAGATGGCCCC
RPS4Y2	6020273	0.0378374	down	-1.4482	1.2686	0.734335	140032	Homo sapiens ribosomal protein S4, Y-linked 2 (RPS4Y2), mRNA.	GO:0006412	GO:0005622|GO:0005840	GO:0003735|GO:0019843	chrY	21340111	21340160	GGGGACAAAGGGAATTCCACACCTGGTGACTCATGATGCTCGAACCATTC
ZBTB16	1240474	0.0257309	down	-1.44759	1.87725	1.3436	7704	Homo sapiens zinc finger and BTB domain containing 16 (ZBTB16), transcript variant 2, mRNA.	GO:0001501|GO:0001823|GO:0001823|GO:0006350|GO:0006511|GO:0006915|GO:0007417|GO:0007417|GO:0008285|GO:0009880|GO:0009952|GO:0030097|GO:0035110|GO:0035116|GO:0035136|GO:0043065|GO:0045449|GO:0045638|GO:0045638|GO:0045892|GO:0048133	GO:0005622|GO:0005634|GO:0005730|GO:0016605|GO:0016607|GO:0017053	GO:0003677|GO:0008270|GO:0016566|GO:0042803|GO:0046872	chr11	113626269	113626318	TTTGAGTGTAAGCTCTGCCACCAGCGCTCCCGGGACTACTCGGCCATGAT
CNPY4	6200743	0.0327973	down	-1.44532	-0.397909	-0.929295	245812	Homo sapiens canopy 4 homolog (zebrafish) (CNPY4), mRNA.		GO:0005576		chr7	99560876	99560925	ATCCAGGAGGCTACACACCAGCAAACCGTGAAGGAGAATGGGACACTGGG
PARP9	5700735	0.0413739	down	-1.44511	-0.603284	-1.13446	83666	Homo sapiens poly (ADP-ribose) polymerase family, member 9 (PARP9), mRNA.	GO:0016477	GO:0005634	GO:0003674|GO:0003950|GO:0016740	chr3	123729903	123729952	CCTTTGCACAGCATCCTTGGAGGGGATTCGCAAGTGGCAGCCCTGTTGAT
LOC729680	2850347	0.0368235	down	-1.44326	2.40875	1.87942	729680	PREDICTED: Homo sapiens misc_RNA (LOC729680), miscRNA.							GACTGGCACTTTCATGGCTGTTCATGGGCATCTCTTGGTCTATGACGACG
MRPS18B	5340138	0.0248377	down	-1.44042	-0.377911	-0.904398	28973	Homo sapiens mitochondrial ribosomal protein S18B (MRPS18B), nuclear gene encoding mitochondrial protein, mRNA.	GO:0006412	GO:0005622|GO:0005739|GO:0005763|GO:0005840|GO:0005840|GO:0005840	GO:0003735	chr6	30701983	30702032	GTTGCTGATAGGGATAAATCTTGAGGCTGAGGGCGGGTGGTACAGATGTG
LOC340260	2480056	0.0380872	down	-1.43999	0.827287	0.301232	340260	PREDICTED: Homo sapiens similar to Unc4.1 homeobox (LOC340260), mRNA.							GCTGGAGAAGGCGTTCAACGAGAGCCACTATTCCGACGTGTTCATGCGCG
EOMES	7320372	0.0216959	down	-1.43943	0.799297	0.273802	8320	Homo sapiens eomesodermin homolog (Xenopus laevis) (EOMES), mRNA.	GO:0001824|GO:0006355|GO:0007275|GO:0009653|GO:0030154	GO:0005634	GO:0003700	chr3	27757929	27757978	GTCCAGGATTGCCTCACTTGAGACTTGCTAGGCCTCTGCTGTGTGCTGGG
TOB1	4390300	0.0276781	down	-1.43683	0.693628	0.170734	10140	Homo sapiens transducer of ERBB2, 1 (TOB1), mRNA.	GO:0007184|GO:0008285|GO:0030514|GO:0045668	GO:0005737	GO:0003714|GO:0005070|GO:0046332	chr17	48940472	48940521	CCAATGGAATGTTCCCAGGTGACAGCCCCCTTAACCTCAGTCCTCTCCAG
METTL2A	1240646	0.0119357	down	-1.43565	1.47425	0.952551	339175	Homo sapiens methyltransferase like 2A (METTL2A), mRNA.			GO:0008168|GO:0016740	chr17	57880828	57880877	CTTAGTTCCATGGAATTTTAAGCATTGTTCCCCCTCTAACCTGTGTCTAA
TMEM218	4050463	0.0369539	down	-1.43533	0.588032	0.0666478	219854	Homo sapiens transmembrane protein 218 (TMEM218), mRNA.		GO:0016020|GO:0016021		chr11	124966945	124966994	GCAGAGCTCTGTGAAGGCAATGAGTGTCACTTCCCTCTGCTCTAATAAAG
FLJ45831	6580681	0.0224601	down	-1.43404	0.899771	0.379688	400576	Homo sapiens FLJ45831 protein (FLJ45831), mRNA.				chr17	14611772	14611821	GGGATGTCCAGTGTGGTGTTATATACAAGTGGTAATTGTAAGTGTCCCTG
MFAP2	5090615	0.0348933	down	-1.4329	-2.29498	-2.81392	4237	Homo sapiens microfibrillar-associated protein 2 (MFAP2), transcript variant 1, mRNA.		GO:0001527|GO:0001527|GO:0005576|GO:0005578		chr1	17173683	17173732	CCCTTCTCAGCCCGTTTTGAGGACAGACAGTCCCCCGAGGTAGGCTACAT
BMF	7650209	0.0237913	down	-1.43261	0.447099	-0.0715497	90427	Homo sapiens Bcl2 modifying factor (BMF), transcript variant 4, mRNA.	GO:0042981	GO:0005737|GO:0005829|GO:0005886|GO:0016459|GO:0016459	GO:0005515|GO:0005515|GO:0005515	chr15	40380561	40380610	AACAGCTCTGTGTGTGAAGGTGAGGACTCTTGGAAGCAGGCCATCCTGGC
AIF1L	4010647	0.0492723	down	-1.43166	4.3698	3.85211	83543	Homo sapiens allograft inflammatory factor 1-like (AIF1L), transcript variant 1, mRNA.				chr9	132988191	132988240	ACCAGTAACGTGAGGACTGCCAAGTATGGCTTTGTCCCTATGACTCAGAG
CMTM4	2120634	0.00768846	down	-1.4315	1.41135	0.89382	146223	Homo sapiens CKLF-like MARVEL transmembrane domain containing 4 (CMTM4), transcript variant 2, mRNA.	GO:0006935	GO:0005615|GO:0016020|GO:0016021	GO:0005125	chr16	66648816	66648865	GTCCCCGACAGCAGGCAAAGCCTCACATTGCCCTCAATTTTCCCCCTTTC
C5	1340241	0.0147912	down	-1.429	1.07844	0.56344	727	Homo sapiens complement component 5 (C5), mRNA.	GO:0000187|GO:0006935|GO:0006950|GO:0006954|GO:0006957|GO:0006958|GO:0007186|GO:0019835	GO:0005576|GO:0005576|GO:0005579|GO:0005615	GO:0004866|GO:0005102|GO:0005102|GO:0008009	chr9	123714714	123714763	GGAACACCTCCTCAAACCTACCACTCAGGAATGTTTGCTGGGGCCGAAAG
CROT	3830274	0.0113701	down	-1.42825	-0.469286	-0.983533	54677	Homo sapiens carnitine O-octanoyltransferase (CROT), mRNA.	GO:0006091|GO:0006629|GO:0006631|GO:0006810|GO:0015908	GO:0005777	GO:0008415|GO:0008458|GO:0016740	chr7	86866662	86866711	TGGCTGCAGTGAGCTGTGATGTGCCCTTATGCTATAGCCTGGGCAAGAGC
THBS2	2600164	0.0413634	down	-1.4269	-1.13825	-1.65113	7058	Homo sapiens thrombospondin 2 (THBS2), mRNA.	GO:0007155	GO:0005576|GO:0005576|GO:0031093	GO:0005198|GO:0005509|GO:0005515|GO:0008201	chr6	169616127	169616176	GACTGTCAACAGCGTGCAGGTTTTCTGTTTCTGTGTTGTGGGGTCAACCG
HSD17B12	3420341	0.0467822	down	-1.42688	-0.512273	-1.02514	51144	Homo sapiens hydroxysteroid (17-beta) dehydrogenase 12 (HSD17B12), mRNA.	GO:0008152|GO:0006694|GO:0055114	GO:0005783|GO:0005789|GO:0016020|GO:0016021	GO:0005488|GO:0016491|GO:0004303|GO:0005488|GO:0016491	chr11	43833484	43833533	GTACCACTGAAACCCTGACCCAGAAAAGTGGCTTGCTTGGACACCCAGCT
ADCK4	4290053	0.0385771	down	-1.42596	0.956545	0.444611	79934	Homo sapiens aarF domain containing kinase 4 (ADCK4), mRNA.		GO:0016020|GO:0016021	GO:0004674|GO:0016301|GO:0016740	chr19	45889500	45889549	GGGAAGCGGTTAACTTATCTTTGCCAACATTTGAGGGAGCCTTGGGCCGC
ALB	4230156	0.0315288	down	-1.42573	0.935189	0.423488	213	Homo sapiens albumin (ALB), mRNA.	GO:0006810|GO:0006810|GO:0009267|GO:0019836|GO:0043066|GO:0043072|GO:0051659	GO:0005576|GO:0005615|GO:0005737|GO:0005576|GO:0005576|GO:0005576|GO:0005576|GO:0005576|GO:0005615|GO:0031093|GO:0043234	GO:0003677|GO:0005504|GO:0005504|GO:0005504|GO:0005507|GO:0005515|GO:0008144|GO:0008144|GO:0008144|GO:0008144|GO:0008144|GO:0015643|GO:0016209|GO:0019825|GO:0030170|GO:0046872	chr4	74504175	74504838	GAAGTGCTGCAAGGCTGACGATAAGGAGACCTGCTTTGCCGAGGAGGGTA
TMEM59L	5890082	0.020559	down	-1.42554	2.67552	2.16401	25789	Homo sapiens transmembrane protein 59-like (TMEM59L), mRNA.		GO:0005624|GO:0016020|GO:0016021		chr19	18592787	18592836	CCCTATAAAGCGTGCCTGGGGCTTGTCTGGGGCTGGGGAGGAATAAACCA
MARCH3	3290332	0.00238896	down	-1.42527	0.828746	0.317513	115123	Homo sapiens membrane-associated ring finger (C3HC4) 3 (MARCH3), mRNA.	GO:0006511|GO:0006897	GO:0005768|GO:0016020|GO:0016021|GO:0030659|GO:0031410|GO:0031901	GO:0008270|GO:0016874|GO:0046872	chr5	126394099	126394148	AGTTGTTGAGCAGGTCCGTGAATTGTCAGCGCGCTGTGGGCGACTGTGTG
LOC441061	450373	0.018485	down	-1.42344	0.74211	0.232732	441061	PREDICTED: Homo sapiens similar to membrane-associated ring finger (C3HC4) 4 (LOC441061), mRNA.				chr5	16120597	16120646	GGCCCCATGAAGACTTATCAGAAGATAACAGCTCGGGGGAGGTTGTGATG
MORN5	4390040	0.0491369	down	-1.42279	1.11113	0.602412	254956	Homo sapiens MORN repeat containing 5 (MORN5), mRNA.				chr9	123971800	123971849	GCGACGGCTATGATCGGAGGTTTTACACAGAGATCCTCAATGGCTTGAAG
RBPJ	2450554	0.0148252	down	-1.42148	-0.382826	-0.890223	3516	Homo sapiens recombination signal binding protein for immunoglobulin kappa J region (RBPJ), transcript variant 4, mRNA.	GO:0001756|GO:0002040|GO:0006310|GO:0007219|GO:0007368|GO:0007507|GO:0022008|GO:0045892	GO:0005634|GO:0005730	GO:0000150|GO:0003700|GO:0005515|GO:0005515	chr4	25973262	25973311	GGCTGAGGTGTTTTGAGGTGCATCGAAGTGTTCCAAGCTGTGACTTACCT
YBX2	4070309	0.0148451	down	-1.42147	1.9669	1.45952	51087	Homo sapiens Y box binding protein 2 (YBX2), mRNA.	GO:0006355|GO:0006366|GO:0007283|GO:0009386	GO:0005634|GO:0005737	GO:0003677|GO:0003723				CCCCCGGCCCCCTACCTCTGAAGCCATTTTATGATCTGTCATGTGCCACC
NCAM2	5080292	0.029248	down	-1.4214	1.46893	0.961612	4685	Homo sapiens neural cell adhesion molecule 2 (NCAM2), mRNA.	GO:0007155|GO:0007158|GO:0007166|GO:0034109|GO:0050850	GO:0005886|GO:0009897|GO:0016021|GO:0030424	GO:0005515	chr21	21832517	21832566	GAGCTACATGTGTAAGAAGGCCCTGCATGTGTATGAGTCCTATTCTGGGC
LRTOMT	4230482	0.0153913	down	-1.41672	2.2224	1.71985	220074	Homo sapiens leucine rich transmembrane and 0-methyltransferase domain containing (LRTOMT), mRNA.				chr11	71485446	71485495	GGCCTCCATGACAGGCCAAGAAGATGGCCTATGATCTCTGAAACCAGCCC
FRZB	3370113	0.0250878	down	-1.41586	2.13781	1.63613	2487	Homo sapiens frizzled-related protein (FRZB), mRNA.	GO:0001501|GO:0007275|GO:0030154|GO:0030178	GO:0005576|GO:0016020	GO:0017147	chr2	183698882	183698931	GCCTGATTGAGAAGCACAACTGAAACCAGTAGCCGCTGGGGTGTTAATGG
BDNFOS	4760064	0.00851102	down	-1.41579	0.986203	0.4846	497258	Homo sapiens BDNF opposite strand (non-protein coding) (BDNFOS), non-coding RNA.				chr11	27654191	27654240	CAGTGTTCCCACTGCAAACTACGGATGGGGTAAAAGACTGCTCACCTCCT
IRF9	2000022	0.0365533	down	-1.41519	-1.06889	-1.56989	10379	Homo sapiens interferon regulatory factor 9 (IRF9), mRNA.	GO:0006350|GO:0006355|GO:0006366|GO:0007166|GO:0009615|GO:0045351	GO:0005634|GO:0005737	GO:0003700|GO:0042802	chr14	23705357	23705406	GTCCGTGATAATCGTGTCCTGAAAATCCTCGCACACACTGGCTGGTGGAG
HNMT	3870102	0.0177809	down	-1.41516	-0.421266	-0.922235	3176	Homo sapiens histamine N-methyltransferase (HNMT), transcript variant 2, mRNA.	GO:0007585	GO:0005737	GO:0008168|GO:0016740|GO:0008170|GO:0016740|GO:0008168|GO:0016740|GO:0046539	chr2	138438609	138438658	CACGGAACACCAGTGCATGCAGGAATTCATGGACAAGAAGCTGCCAGGCA
FADS3	1230132	0.0160891	down	-1.41514	-0.343578	-0.844518	3995	Homo sapiens fatty acid desaturase 3 (FADS3), mRNA.	GO:0006629|GO:0006636|GO:0006810|GO:0022900	GO:0005624|GO:0005783|GO:0005789|GO:0016020|GO:0016021	GO:0003674|GO:0005506|GO:0016491|GO:0016717|GO:0020037	chr11	61641244	61641293	CATCAGTGAAGGCAACACCCAGGCGGGCAGAGAAGGGCTCAGGGCACCAG
RAB38	2600070	0.0499589	down	-1.41464	0.472897	-0.0275389	23682	Homo sapiens RAB38, member RAS oncogene family (RAB38), mRNA.	GO:0007264|GO:0015031	GO:0005575|GO:0005886|GO:0042470	GO:0000166|GO:0003924|GO:0005525	chr11	87846655	87846704	CCAAGATGACCTCCATTCTCGGCAGACCTAAGAGTTGCCTCTGAGTTAGC
MATN2	5810746	0.0411264	down	-1.41372	0.0758317	-0.423667	4147	Homo sapiens matrilin 2 (MATN2), transcript variant 1, mRNA.	GO:0008150	GO:0005576|GO:0005578|GO:0005578	GO:0003674|GO:0005509	chr8	99039771	99039820	CTGTGGACACAACTTGCTTCTGCCTCATCCTGCCTTAGTGTGCAATCTCA
ABHD1	620113	0.0236805	down	-1.41308	0.807244	0.308396	84696	Homo sapiens abhydrolase domain containing 1 (ABHD1), mRNA.	GO:0008150	GO:0016020|GO:0016021	GO:0003674|GO:0004091|GO:0016787|GO:0004091|GO:0016787	chr2	27207025	27207074	TCTTGCATCAGTACGCCAAAGCCATCTTCCAGGACCCAGAGGGGCTGCCT
FBXO15	770044	0.0345342	down	-1.41262	1.58658	1.08821	201456	Homo sapiens F-box protein 15 (FBXO15), mRNA.	GO:0006511	GO:0019005	GO:0005515	chr18	69891752	69891801	TGATGCGGAAGGAAGAGTGCACGTGGAGCTGGTGTGGATCAGAGAGACCG
CNGA3	3400433	0.0245029	down	-1.41104	1.73293	1.23617	1261	Homo sapiens cyclic nucleotide gated channel alpha 3 (CNGA3), transcript variant 1, mRNA.	GO:0006811|GO:0006813|GO:0006811|GO:0006813|GO:0007165|GO:0007601|GO:0050896	GO:0016020|GO:0016021|GO:0001750|GO:0016020|GO:0016021	GO:0005216|GO:0005249|GO:0000166|GO:0005221|GO:0005249|GO:0005515|GO:0015276|GO:0030553	chr2	98381071	98381120	CCCATTCACCCATGAAGAGGAAGCCTCAAGATCCCTTGGAATTGCATCCC
EBF4	3710551	0.0359274	down	-1.41096	1.27	0.773321	57593	Homo sapiens early B-cell factor 4 (EBF4), mRNA.	GO:0006350|GO:0006355|GO:0007275	GO:0005634	GO:0003677|GO:0008270|GO:0046872	chr20	2740268	2740317	TGGGGACCGTGGGAAAGAGGACAGCTCAGGGAGAAGTGACCTGGAAAGGT
AXL	6480703	0.0228429	down	-1.41005	-2.73779	-3.23354	558	Homo sapiens AXL receptor tyrosine kinase (AXL), transcript variant 1, mRNA.	GO:0006468|GO:0007165	GO:0005887|GO:0016020	GO:0000166|GO:0004714|GO:0004872|GO:0005524|GO:0016740	chr19	46459226	46459275	TTTCAAGGTTCTAACCCTATACTGTAGTATTCTTTGGGGTGCCCCTCTCC
ACAD11	3370136	0.0197167	down	-1.4077	0.258227	-0.23511	84129	Homo sapiens acyl-Coenzyme A dehydrogenase family, member 11 (ACAD11), mRNA.	GO:0008152	GO:0005777	GO:0003995|GO:0009055|GO:0050660	chr3	133759827	133759876	AGAAGACCCTGACCCACTGAGGGTTTGTTGTGAGAATTGCTGAAGCCACG
PAQR8	2070451	0.0182696	down	-1.40747	2.4919	1.99879	85315	Homo sapiens progestin and adipoQ receptor family member VIII (PAQR8), mRNA.				chr6	52380336	52380385	CCTCCAGATGGCATTCATGTCTTACTCAGAAAGGGCACTGCCATTGTCCC
RSPH1	6020451	0.0157729	down	-1.40726	2.65673	2.16385	89765	Homo sapiens radial spoke head 1 homolog (Chlamydomonas) (RSPH1), mRNA.	GO:0007126	GO:0005634|GO:0005737		chr21	43892978	43896054	AGAGCCGGGAGTATGACCAGGAGGAGTTCCGCTATGACATGGATGAGGGA
RIMKLB	1940056	0.043157	down	-1.40692	2.22628	1.73373	57494	Homo sapiens ribosomal modification protein rimK-like family member B (RIMKLB), mRNA.				chr12	8820892	8820941	GGCTGGTGAGACACGATCCCCTCCTAAGAAAATGTAGGTGCTCAGACAGG
KCNS1	6620259	0.0314994	down	-1.40583	0.409535	-0.0818836	3787	Homo sapiens potassium voltage-gated channel, delayed-rectifier, subfamily S, member 1 (KCNS1), mRNA.	GO:0006811|GO:0006813	GO:0005886|GO:0008076|GO:0016021	GO:0005244|GO:0005251|GO:0005515|GO:0015459|GO:0030955	chr20	43720993	43721042	TGAGGCTGTTTGTGGTCCTGGCAGAAAAGCAACAACTCGCTCCCCTTCCC
GPKOW	7200475	0.0361897	down	-1.40521	0.249189	-0.241595	27238	Homo sapiens G patch domain and KOW motifs (GPKOW), mRNA.	GO:0008150	GO:0005575|GO:0005622|GO:0005634|GO:0005730	GO:0003674|GO:0003676	chrX	48970398	48970447	CCTGGGACAAGGACAAGGGAAAGGGATGGGTGAACCAGTAGGGAAGCTAG
LARP1	4040376	0.00768846	down	-1.40497	0.153455	-0.337083	23367	Homo sapiens La ribonucleoprotein domain family, member 1 (LARP1), transcript variant 2, mRNA.			GO:0003723|GO:0005515	chr5	154175275	154175324	TCTGGCACCCTCCTGAATGGAACCCCAGAGTACCTCCTGTGTGGAAGGGT
LOC100130623	7150392	0.039339	down	-1.4042	0.0859574	-0.403791	100130623	PREDICTED: Homo sapiens hypothetical protein LOC100130623 (LOC100130623), mRNA.				chr20	28135635	28135684	GACCCTCCTTGGGGGGAAAAATACCAGTACCCAGACACCTTTGCACCCTG
KCNJ16	3370544	0.0339074	down	-1.39854	0.831365	0.347444	3773	Homo sapiens potassium inwardly-rectifying channel, subfamily J, member 16 (KCNJ16), transcript variant 1, mRNA.	GO:0006811|GO:0006813	GO:0016020|GO:0016021	GO:0005242|GO:0005244|GO:0030955	chr17	65643151	65643200	AGGGGCATCAGTGTCCCGTGAAATACATTTTGTTGTGCTATGAGCCTCTG
LOC728732	1990328	0.0258511	down	-1.39848	0.000577	-0.483284	728732	PREDICTED: Homo sapiens misc_RNA (LOC728732), miscRNA.				chr11	5549352	5549401	GGTATGGAGGTGGTTTCGGTGGGAATGACAACTTTGGTCATGGAGGAAAC
LOC400145	6200056	0.00347396	down	-1.39807	0.640058	0.156621	400145	Homo sapiens hypothetical gene supported by AK093158 (LOC400145), mRNA.				chr13	73885456	73885505	ACCTCCCCAACTTCAGCCCATGTCTTCACAGCAGCCACTCCCAACGGGCT
KDM1B	4220112	0.0148252	down	-1.39731	0.848579	0.365929	221656	Homo sapiens lysine (K)-specific demethylase 1B (KDM1B), mRNA.				chr6	18223514	18223563	AACACACCAAGAATGTGCAGTGAACCTCAGGCATTTAAGACACCTCCCCC
CALCOCO2	5820646	0.0336154	down	-1.39721	-1.09671	-1.57926	10241	Homo sapiens calcium binding and coiled-coil domain 2 (CALCOCO2), mRNA.	GO:0016032	GO:0005634|GO:0005737|GO:0005794|GO:0005856	GO:0005515	chr17	44296873	44296922	CCCCTCAGGGACTGAACAAATGGAAATAACTCCCAGGCAGTATCAGGTGG
FAM164C	1030133	0.0107609	down	-1.3967	0.494898	0.012877	79696	Homo sapiens family with sequence similarity 164, member C (FAM164C), transcript variant 2, mRNA.				chr14	74614476	74614525	TGCCCTCAGAATTGATGGGTGAAGACACTGAAGAGTCATGAGCAGGCTCC
CTNND2	4610075	0.029248	down	-1.39633	5.2813	4.79965	1501	Homo sapiens catenin (cadherin-associated protein), delta 2 (neural plakophilin-related arm-repeat protein) (CTNND2), mRNA.	GO:0006350|GO:0006355|GO:0007155|GO:0007158|GO:0007165|GO:0007275|GO:0007612|GO:0048167	GO:0005634|GO:0005737|GO:0030054	GO:0005198|GO:0005515	chr5	11135812	11135861	GCTCGCCTTATTCCCCCAAACTTTTTGTTCATGTGGCAGGGAGCAGTACA
TFPI	4280674	0.0374798	down	-1.39594	0.284105	-0.197129	7035	Homo sapiens tissue factor pathway inhibitor (lipoprotein-associated coagulation inhibitor) (TFPI), transcript variant 2, mRNA.	GO:0007598	GO:0005576|GO:0005576|GO:0005634|GO:0005737|GO:0005886	GO:0004867	chr2	188343457	188343506	GGTTGGAAGAATGCGGCTCATATTTACCAAGTCTTTCTGAACGCCTTCTG
LOC100134011	2190279	0.0153913	down	-1.39576	1.01388	0.532827	100134011	PREDICTED: Homo sapiens similar to PR domain containing 15 (LOC100134011), mRNA.							GGTCATCATGTGCAAGGGGTCACGTGAGGTCACTGACTCCAGCTCAAAAG
ALDH5A1	2640274	0.0355268	down	-1.39524	1.40372	0.923202	7915	Homo sapiens aldehyde dehydrogenase 5 family, member A1 (ALDH5A1), nuclear gene encoding mitochondrial protein, transcript variant 2, mRNA.	GO:0006650|GO:0006678|GO:0006681|GO:0042135|GO:0046459|GO:0055114|GO:0006006|GO:0006083|GO:0006105|GO:0006536|GO:0006541|GO:0006650|GO:0006681|GO:0006749|GO:0007417|GO:0009450|GO:0009450|GO:0022904|GO:0042135|GO:0046459|GO:0051289|GO:0055114	GO:0005739|GO:0005625|GO:0005739	GO:0004777|GO:0016491|GO:0004777|GO:0004777|GO:0016491|GO:0042803	chr6	24537360	24537409	GTGTGTTTTAGTGTCTAGTCTGCAGAGAGCTGTGTGATTAATAAACGTGG
ZNF626	5690440	0.045903	down	-1.39355	0.547142	0.068377	199777	Homo sapiens zinc finger protein 626 (ZNF626), transcript variant 2, mRNA.	GO:0006355|GO:0006350|GO:0006355	GO:0005622|GO:0005622|GO:0005634	GO:0003676|GO:0003677|GO:0008270|GO:0046872	chr19	20844349	20844398	TTCCGGGTTTGGTGCGGCCTTTGTCTCTCGCTGCAGTCAGAGCTCCAGGT
C16orf86	3140653	0.0290122	down	-1.39338	-0.411802	-0.890389	388284	Homo sapiens chromosome 16 open reading frame 86 (C16orf86), mRNA.				chr16	66259945	66259994	AAGATGCTGAGTGTCTGCACTGCTCCACTTGTCCCCCCGCTCTCTCCTCA
EN2	5490377	0.030243	down	-1.39318	1.38234	0.903953	2020	Homo sapiens engrailed homeobox 2 (EN2), mRNA.	GO:0006355|GO:0007275|GO:0030901|GO:0030902|GO:0048666	GO:0005634	GO:0003700|GO:0043565	chr7	154949752	154949801	AGTGTATGGGGAAAGACCAATCCAACTGTCCATCTGTGGCTGGGACAGCC
ABCA8	2710392	0.0439724	down	-1.3925	2.05913	1.58145	10351	Homo sapiens ATP-binding cassette, sub-family A (ABC1), member 8 (ABCA8), mRNA.	GO:0006810	GO:0005886|GO:0016021	GO:0000166|GO:0005524|GO:0016887|GO:0042626	chr17	66863990	66864039	GCCAACCTCCTCTCACAGCCTCTGTATCTCTGCAGGCCATACTGGTTCCA
STK39	3370092	0.044827	down	-1.39238	1.95871	1.48116	27347	Homo sapiens serine threonine kinase 39 (STE20/SPS1 homolog, yeast) (STK39), mRNA.				chr2	168811112	168811161	CAAGGAGGTGGGCTCCCAGGATGGTACCATTGCTCTTTCCTAGCTAACCC
OCA2	4250463	0.0423296	down	-1.39156	0.992055	0.51535	4948	Homo sapiens oculocutaneous albinism II (pink-eye dilution homolog, mouse) (OCA2), mRNA.	GO:0006726|GO:0006810|GO:0007286|GO:0008283|GO:0015746|GO:0030318|GO:0042438|GO:0048066	GO:0005737|GO:0016020|GO:0016021|GO:0033162	GO:0005215|GO:0005215|GO:0005302|GO:0015105|GO:0015137	chr15	25673919	25673968	TTCAAGCGAATGTTGGAACACCATGACCTCCTCTGTGTGTCCTTTCTCCC
F3	3120138	0.0371997	down	-1.39155	-2.38875	-2.86545	2152	Homo sapiens coagulation factor III (thromboplastin, tissue factor) (F3), mRNA.	GO:0007598	GO:0005886|GO:0005886|GO:0005886|GO:0005886|GO:0005886|GO:0016021		chr1	94767913	94767962	TGGGCGTGAACCACCATGCCCAGCCGAAAAGCTTTTGAGGGGCTGACTTC
PEA15	3610228	0.0258692	down	-1.39061	0.90808	0.432357	8682	Homo sapiens phosphoprotein enriched in astrocytes 15 (PEA15), mRNA.	GO:0042981|GO:0042981|GO:0006916|GO:0008643|GO:0042981|GO:0046325	GO:0005737|GO:0005875	GO:0005515|GO:0005515|GO:0005351|GO:0005515	chr1	158451675	158451724	ACCTGCCCACCCACTCCTTATATTGCTGTGAGATTGCCCCTATCTTGTGC
KIAA0182	4390382	0.0153913	down	-1.38984	0.648211	0.173294	23199	Homo sapiens KIAA0182 (KIAA0182), mRNA.				chr16	84267131	84267180	CCGGTGCCTCGGTCACTCTGGGGGCAGTTTAGATGCTGTGAAATTAAACC
TMEM107	6290612	0.0296975	down	-1.38827	0.0397172	-0.43357	84314	Homo sapiens transmembrane protein 107 (TMEM107), transcript variant 1, mRNA.		GO:0016020|GO:0016021		chr17	8017481	8017530	CAGGACTTGCAACACCCTGATTGCTCCTGTCTGATTCTTTCTGACGATCA
CNGA3	5090091	0.0327845	down	-1.38776	1.9743	1.50154	1261	Homo sapiens cyclic nucleotide gated channel alpha 3 (CNGA3), transcript variant 2, mRNA.	GO:0006811|GO:0006813|GO:0006811|GO:0006813|GO:0007165|GO:0007601|GO:0050896	GO:0016020|GO:0016021|GO:0001750|GO:0016020|GO:0016021	GO:0005216|GO:0005249|GO:0000166|GO:0005221|GO:0005249|GO:0005515|GO:0015276|GO:0030553	chr2	98381070	98381119	GCCCATTCACCCATGAAGAGGAAGCCTCAAGATCCCTTGGAATTGCATCC
ABHD12	2710615	0.0158977	down	-1.38753	0.350206	-0.122317	26090	Homo sapiens abhydrolase domain containing 12 (ABHD12), transcript variant 2, mRNA.			GO:0016787	chr20	25287490	25287539	TGGTGTGACTGAAGCCAACAGGTGACACGGTCATCGAAGAGCAGCAGACA
LOC100131578	5570377	0.0379059	down	-1.38723	0.724405	0.252194	100131578	PREDICTED: Homo sapiens hypothetical protein LOC100131578 (LOC100131578), mRNA.							CCCCATGCAGGTGTTTCAGGGCTTTACGTCATTCAAGGATGTGGCTGTGA
LOC727935	6060192	0.0424074	down	-1.3859	0.880618	0.409796	727935	PREDICTED: Homo sapiens similar to CHRNA7 (cholinergic receptor, nicotinic, alpha 7, exons 5-10) and FAM7A (family with sequence similarity 7A, exons A-E) fusion (LOC727935), mRNA.				chr15	28676220	28679632	CACCTGTTGTTGAGGCCTTCCCTAACAGTCCCAGAACTCCTACATTGCCT
KIAA0391	6560427	0.0153898	down	-1.38563	0.287699	-0.182846	9692	Homo sapiens KIAA0391 (KIAA0391), mRNA.				chr14	34812848	34812897	CTGACCTTGCCTTCCAGGCCTACCAATAGCAGAATCAATCCATCTGTCCC
GPR37L1	2690731	0.0399424	down	-1.38528	1.72531	1.25513	9283	Homo sapiens G protein-coupled receptor 37 like 1 (GPR37L1), mRNA.	GO:0007165|GO:0007186|GO:0008150	GO:0005886|GO:0016021	GO:0004872	chr1	200365170	200365219	GATCCCTGGGTTGCCCTGTCCCAACCTCCTTGTTAGGTGCTTTCCCATAG
B3GNT6	2260220	0.0316125	down	-1.38233	2.7079	2.2408	11041	Homo sapiens UDP-GlcNAc:betaGal beta-1,3-N-acetylglucosaminyltransferase 6 (B3GNT6), mRNA.	GO:0006486|GO:0016269	GO:0000139|GO:0005794|GO:0016020|GO:0016021	GO:0008378|GO:0016757|GO:0047223	chr11	65869876	65869925	GCTGTGTGGCCTTGAGTAAATCCCGTTACCTCTCTGAGCCTCGGTTACCC
ASMTL	1010349	0.0361897	down	-1.38233	-0.444927	-0.912025	8623	PREDICTED: Homo sapiens acetylserotonin O-methyltransferase-like (ASMTL), mRNA.	GO:0030187	GO:0005575|GO:0005737|GO:0005737	GO:0017096				GAGTATCAGTGCTTGCTGGAGCTGCACGGCTTCCACCAGGTGCAGGTGGT
KCTD21	7100743	0.0284447	down	-1.37983	-0.00192086	-0.466414	283219	Homo sapiens potassium channel tetramerisation domain containing 21 (KCTD21), mRNA.	GO:0006813	GO:0008076|GO:0016020	GO:0005249|GO:0005515	chr11	77882620	77882669	CAGGCCAAGGGTACTTGGGAGAGCCCCTCATGGAGAACCTAGTTTAGACC
ADK	7550161	0.0180772	down	-1.37981	-0.377855	-0.842329	132	Homo sapiens adenosine kinase (ADK), transcript variant ADK-short, mRNA.	GO:0006166|GO:0009156		GO:0000287|GO:0004001|GO:0016301|GO:0016740	chr10	75606521	75606570	GCTCCCAGTCGCTGAGTGCCTGAGCCGGGAAGCAGTTGCTGTGGTACCTG
PC	5890435	0.0430574	down	-1.37912	0.623074	0.159328	5091	Homo sapiens pyruvate carboxylase (PC), nuclear gene encoding mitochondrial protein, transcript variant A, mRNA.	GO:0006094|GO:0008152|GO:0008610	GO:0005737|GO:0005739|GO:0005743|GO:0005759|GO:0005759	GO:0000166|GO:0004736|GO:0004736|GO:0005524|GO:0009374|GO:0016874|GO:0030145	chr11	66372712	66372761	CCGGCGGACAGCTGCTTACATGTTCATCTCTTGCCAAATAAGGGTCCCCT
MFAP4	3060377	0.0433416	down	-1.37676	-5.04612	-5.5074	4239	Homo sapiens microfibrillar-associated protein 4 (MFAP4), mRNA.	GO:0007165|GO:0007155|GO:0007165	GO:0001527|GO:0005576|GO:0005578	GO:0005102|GO:0003674|GO:0005102|GO:0005509	chr17	19286870	19286919	TGGCTCCTCCTTGCTCCCCTGCTGATGGTGTCCTACCCCGAACTCCAAAA
KCTD20	7000086	0.0397584	down	-1.37673	0.0218655	-0.439379	222658	Homo sapiens potassium channel tetramerisation domain containing 20 (KCTD20), mRNA.	GO:0006813	GO:0008076|GO:0016020	GO:0005249|GO:0042802	chr6	36457871	36457920	GCCCAGGAAGGTTAGATGTGTTTGCAAATAAGTTGCCCAAAGGGTCCCCC
C14orf37	2690717	0.0324314	down	-1.37528	0.103202	-0.356522	145407	Homo sapiens chromosome 14 open reading frame 37 (C14orf37), mRNA.		GO:0016020|GO:0016021		chr14	58470956	58471005	CCACAGGGTTGTGGGCCATGGTACATACTGCATTTGCATCAAACTAGCAG
MLC1	450358	0.0371108	down	-1.37118	1.1421	0.686683	23209	Homo sapiens megalencephalic leukoencephalopathy with subcortical cysts 1 (MLC1), transcript variant 1, mRNA.	GO:0006412|GO:0006811|GO:0008150	GO:0000299|GO:0005622|GO:0005634|GO:0005737|GO:0005840|GO:0016020|GO:0016021	GO:0003674|GO:0003735|GO:0005216	chr22	50523796	50523845	TACTTCTTGCTGGAAGTCCCTCACCCAGAGACCAGTGCTCCCAACGGCAG
NADK	6980753	0.0376928	down	-1.36674	0.255716	-0.195025	65220	Homo sapiens NAD kinase (NADK), mRNA.	GO:0008152|GO:0008152|GO:0016310|GO:0019674|GO:0046034|GO:0008152|GO:0008152	GO:0005829|GO:0005829	GO:0003951|GO:0003951|GO:0003951|GO:0005515|GO:0016740|GO:0046872|GO:0003951|GO:0003951	chr1	1683584	1683633	ATAAGGAAGGCACAAGACGTTCTCCTCTGCCCGTGAGGAGCTTCCCGCAG
MATN2	670215	0.0162414	down	-1.36619	-0.0608416	-0.511004	4147	Homo sapiens matrilin 2 (MATN2), transcript variant 1, mRNA.	GO:0008150	GO:0005576|GO:0005578|GO:0005578	GO:0003674|GO:0005509	chr8	99023246	99023295	AATCTGAGCCAGTCACCATAAATATCCAAGACCTACTTTCCTGTTCTAAT
LPAR4	6550070	0.0353244	down	-1.36457	3.70702	3.25857	2846	Homo sapiens lysophosphatidic acid receptor 4 (LPAR4), mRNA.	GO:0007165|GO:0007186	GO:0005886|GO:0005887	GO:0004872|GO:0008289|GO:0045028	chrX	77898994	77899043	CAGCACAGCCAGAAAGGGGCTGCATTTGTGCCCAGGTCAGGAGCAAATTG
WDR38	2070441	0.0267093	down	-1.36438	1.10557	0.657328	401551	Homo sapiens WD repeat domain 38 (WDR38), mRNA.				chr9	126659890	126659939	AGGACGCTTGCTGGAACCCATCAGACACCTGGTCCCCAAAACCAGACCCA
AGA	130064	0.0161878	down	-1.36349	-0.295867	-0.743173	175	Homo sapiens aspartylglucosaminidase (AGA), mRNA.	GO:0006517	GO:0005764	GO:0003948|GO:0016787	chr4	178588987	178589036	CTCTCTGTATGACAACTCTACAGAAGTTGTGCGCGTGCTTTCTCAGCAGC
ST8SIA1	5360025	0.0106309	down	-1.36166	3.86403	3.41867	6489	Homo sapiens ST8 alpha-N-acetyl-neuraminide alpha-2,8-sialyltransferase 1 (ST8SIA1), mRNA.	GO:0005975|GO:0006486|GO:0006688|GO:0008284	GO:0000139|GO:0005794|GO:0016020|GO:0016021|GO:0030173	GO:0003828|GO:0016757	chr12	22245649	22245698	GTGACTCCAAGAGGGAATGGTCAAGTTGTTTCATGAGTTTGCATGGGCCC
DIRC2	2370128	0.027721	down	-1.36088	0.697786	0.253242	84925	Homo sapiens disrupted in renal carcinoma 2 (DIRC2), mRNA.	GO:0006810	GO:0016020|GO:0016021		chr3	124081121	124081170	AACTCTACAGATGGCATACCTGTGCCTGCTTCTGGGGTTGGAAGTGTGAC
LOC653479	1710280	0.00874808	down	-1.36065	-0.436971	-0.881269	653479	PREDICTED: Homo sapiens similar to mitochondrial ribosomal protein L45 (LOC653479), mRNA.				chr17	42922594	42922643	CTATGTTCCTCCTGAGGGTGATGCACGCATATCATCTCTTTCAAAGGAGA
DHTKD1	6250075	0.0276781	down	-1.36013	0.899859	0.456118	55526	Homo sapiens dehydrogenase E1 and transketolase domain containing 1 (DHTKD1), mRNA.	GO:0006096|GO:0055114	GO:0005739	GO:0004591|GO:0016491|GO:0030976	chr10	12164599	12164648	TTTCTCTGAAGTGGTGTGGGAAGTACCAGGGGACTGGCAGAAGCCCAGGC
MAP1B	1690068	0.0179086	down	-1.35994	1.82344	1.3799	4131	Homo sapiens microtubule-associated protein 1B (MAP1B), transcript variant 2, mRNA.	GO:0001578|GO:0016358	GO:0005829|GO:0005874|GO:0005875	GO:0005198|GO:0005515	chr5	71515274	71515323	TATCTGGAAAAGCTAAAGGTCTCCTCTTTTGTTTGTGTTTTTGTGCCTGC
RGMB	840553	0.0399454	down	-1.35938	0.426017	-0.0169299	285704	Homo sapiens RGM domain family, member B (RGMB), transcript variant 1, mRNA.	GO:0007155|GO:0007155|GO:0007165|GO:0030509|GO:0030509|GO:0045941	GO:0005793|GO:0005793|GO:0005886|GO:0046658|GO:0046658	GO:0042802|GO:0042802	chr5	98159946	98159995	CCCCCCAACAGTGTGTCGAGTCTTTGCAAAGAAACCTTTAGATGTGGTTC
DLL3	4210382	0.0438868	down	-1.35893	3.38971	2.94723	10683	Homo sapiens delta-like 3 (Drosophila) (DLL3), transcript variant 1, mRNA.	GO:0001501|GO:0007219|GO:0007275|GO:0030154	GO:0016020|GO:0016021	GO:0005112	chr19	44690751	44690800	TCCGCACCTGGAGTCAGAGCGTGGATTTTTGTATTTGCTCGGTGGTGCCC
FAM38B	2510753	0.0326837	down	-1.35765	1.09736	0.65625	63895	Homo sapiens family with sequence similarity 38, member B (FAM38B), mRNA.		GO:0016020|GO:0016021		chr18	10661147	10661196	GAAAGATGCCTGTGTTTTCCTCTGTGGGGCCCGTGCACTTCCTGGAGAGA
MED6	7200598	0.0388025	down	-1.35709	-0.256495	-0.697006	10001	Homo sapiens mediator complex subunit 6 (MED6), mRNA.	GO:0045944	GO:0000119|GO:0000119|GO:0005634	GO:0003702|GO:0003713|GO:0005515	chr14	71051001	71051050	CTTCTGTAACCTTTCCTCTCCCGGACTTGAGCAACCTACACACTCACATG
LOC653566	7040068	0.0157108	down	-1.35675	0.00213496	-0.43802	653566	Homo sapiens similar to Signal peptidase complex subunit 2 (Microsomal signal peptidase 25 kDa subunit) (SPase 25 kDa subunit) (LOC653566), mRNA.							AGTGGCCGTAGCGGCTTGTTGGATAAGTGGAAGATAGATGATAAGCCTGT
RND1	7570053	0.018485	down	-1.35636	2.15192	1.71218	27289	Homo sapiens Rho family GTPase 1 (RND1), mRNA.	GO:0007015|GO:0007015|GO:0007162|GO:0007264|GO:0016322	GO:0005622|GO:0005737|GO:0005856|GO:0005886|GO:0005912	GO:0000166|GO:0003924|GO:0003924|GO:0005525	chr12	49251137	49251186	TCACCTAAGTCCCCAGGGTCCAAGGGAGAAGCCCCAGACCCCCTTCTCTT
CPS1	6110044	0.0197851	down	-1.35621	1.81025	1.37068	1373	Homo sapiens carbamoyl-phosphate synthetase 1, mitochondrial (CPS1), mRNA.	GO:0006541|GO:0006807|GO:0000050|GO:0006541|GO:0006807	GO:0005739	GO:0003824|GO:0004086|GO:0005524|GO:0000166|GO:0004087|GO:0005515|GO:0005524|GO:0016874	chr2	211251797	211251846	CTTGGCCCGAGTGAAATAATCAGATTTTTGTCATTCACACTCTCCCCCAG
NFX1	4060494	0.043157	down	-1.35561	-0.884668	-1.32361	4799	Homo sapiens nuclear transcription factor, X-box binding 1 (NFX1), transcript variant 3, mRNA.	GO:0000122|GO:0006350|GO:0006355|GO:0006511|GO:0006954|GO:0044419|GO:0045347	GO:0005634	GO:0003700|GO:0005515|GO:0008270|GO:0016874|GO:0046872	chr9	33311134	33313659	TGTGCTGTTGGAAAAGTGGAACAGATAGACTTGCTGGAGACAGGGTTGCC
GALM	2480450	0.0423097	down	-1.35435	-0.537491	-0.97509	130589	Homo sapiens galactose mutarotase (aldose 1-epimerase) (GALM), mRNA.	GO:0005975|GO:0005975	GO:0005737	GO:0004034|GO:0016853|GO:0030246|GO:0016853|GO:0030246	chr2	38814645	38814694	GCCTCACCCTGCATGCTAGGAGATGGACCTGTCTCTATACAGCAGTAGAT
ACY1	1400341	0.0358911	down	-1.35323	-0.827893	-1.2643	95	Homo sapiens aminoacylase 1 (ACY1), mRNA.	GO:0006508|GO:0006520	GO:0005737|GO:0005829	GO:0004046|GO:0008237|GO:0008270|GO:0016787|GO:0046872|GO:0046983	chr3	51997630	51997841	GGCAGCTTTTAGCCGGGTCTGCAAGGATATGAACCTCACTCTGGAGCCTG
HCRTR2	7000646	0.0306527	down	-1.35123	0.680479	0.246201	3062	Homo sapiens hypocretin (orexin) receptor 2 (HCRTR2), mRNA.	GO:0007165|GO:0007200|GO:0007218|GO:0007268|GO:0007631	GO:0005886|GO:0005887	GO:0004872|GO:0008188|GO:0016499	chr6	55255063	55255112	CTCACCAGGGGACGAACTAGCACAGAGAGCCGGAAGTCCTTGACCACTCA
ZNF467	2490333	0.0445458	down	-1.35092	3.47007	3.03613	168544	Homo sapiens zinc finger protein 467 (ZNF467), mRNA.	GO:0006350|GO:0006355|GO:0008152	GO:0005622|GO:0005634	GO:0003677|GO:0008270|GO:0016491|GO:0046872	chr7	149461497	149461546	AAAGCAGATATTTCCCGGACCCAGCGCGGCCTCAACCAGGGCAGGAAAGA
SAMD13	3390523	0.0167965	down	-1.34959	0.688173	0.255653	148418	Homo sapiens sterile alpha motif domain containing 13 (SAMD13), mRNA.				chr1	84588609	84588658	GCATCATGGCCCCTTCAGGAGCAGAATCATAGCTCTGAAAAGAGAAGCTC
MYH7	6900360	0.0147912	down	-1.34953	0.805517	0.373065	4625	Homo sapiens myosin, heavy chain 7, cardiac muscle, beta (MYH7), mRNA.	GO:0002027|GO:0006200|GO:0006941|GO:0007512|GO:0030049|GO:0030049|GO:0055010	GO:0005634|GO:0005730|GO:0005737|GO:0005863|GO:0005925|GO:0016459	GO:0000146|GO:0000166|GO:0003779|GO:0005516|GO:0005524|GO:0008307|GO:0008307|GO:0016887|GO:0030898	chr14	23882008	23882057	GCCACATCTTGATCTGCTCAGCCCTGGAGGTGCCAGCAAAGCCCCATGCT
H2BFM	4610093	0.0194512	down	-1.34811	0.609757	0.178822	286436	PREDICTED: Homo sapiens H2B histone family, member M (H2BFM), mRNA.	GO:0006334	GO:0000786|GO:0005634|GO:0005694	GO:0003677	chrX	103183165	103183214	TTGGTCAAGAGGGAAACAGGGTCAGGGCAAGATGGTAGCCAGAGCTTCCC
SLC25A20	1430286	0.0399379	down	-1.34651	-0.179499	-0.608729	788	Homo sapiens solute carrier family 25 (carnitine/acylcarnitine translocase), member 20 (SLC25A20), nuclear gene encoding mitochondrial protein, mRNA.	GO:0006810|GO:0006853|GO:0046320	GO:0005739|GO:0005743|GO:0005743|GO:0016020|GO:0016021	GO:0005215|GO:0005488|GO:0015227	chr3	48875045	48875094	TTCAGGCTTCTTCAGGAGAAAGCAAGTACACTGGTACCTTGGACTGTGCA
ACER3	2360228	0.0233424	down	-1.34557	0.429106	0.000891	55331	Homo sapiens alkaline ceramidase 3 (ACER3), mRNA.				chr11	76734692	76734741	CCACCTGTGTGGCTGTTTGCAGACCTACCTCTGTCTTCCATTTTGCATCC
SH3KBP1	3450059	0.0306527	down	-1.34545	-1.01254	-1.44063	30011	Homo sapiens SH3-domain kinase binding protein 1 (SH3KBP1), transcript variant 1, mRNA.	GO:0006897|GO:0006915|GO:0007267	GO:0005634|GO:0005730|GO:0005737|GO:0005829|GO:0005829|GO:0005829|GO:0005829|GO:0005856|GO:0005886|GO:0019717|GO:0030054|GO:0030659|GO:0031410|GO:0045202|GO:0005634|GO:0005730|GO:0005737|GO:0005737|GO:0005737	GO:0003674|GO:0005515|GO:0017124|GO:0016301|GO:0016301|GO:0016301	chrX	19463663	19463712	CCACTAGAGGCCACTGTCTTCAAAGCTTCTCTCACCCTAGCCAAAGGTCC
REEP6	2320273	0.045903	down	-1.34478	0.260408	-0.166966	92840	Homo sapiens receptor accessory protein 6 (REEP6), mRNA.		GO:0016020|GO:0016021	GO:0004872	chr19	1448755	1448804	AGTGCCCGAGCTGGTCCCCTGCCATTCCGGGACCTCTCTGGAGTACACTT
NSUN4	3120653	0.0147912	down	-1.34474	0.178187	-0.249143	387338	Homo sapiens NOP2/Sun domain family, member 4 (NSUN4), mRNA.			GO:0008168|GO:0016740	chr1	46603147	46603196	GTGCAGTCCACATGTGCATAAGGACCATGGGGAGCTTGTATTTGGGAATT
MLLT10	5550403	0.0309562	down	-1.34457	0.988453	0.561308	8028	Homo sapiens myeloid/lymphoid or mixed-lineage leukemia (trithorax homolog, Drosophila); translocated to, 10 (MLLT10), transcript variant 1, mRNA.		GO:0005634|GO:0005737|GO:0005634|GO:0005737	GO:0005515|GO:0008270|GO:0046872|GO:0005515|GO:0008270|GO:0046872|GO:0005515|GO:0008270|GO:0046872|GO:0003700|GO:0005515|GO:0008270|GO:0046872	chr10	21823103	21823152	GCGCACGCAGGGCTAGCCTCGCCCAGGCCTCCTCCCTCACGCCGGCCGCA
LOC653566	4210315	0.0353244	down	-1.34394	0.00113869	-0.425334	653566	PREDICTED: Homo sapiens similar to Signal peptidase complex subunit 2 (Microsomal signal peptidase 25 kDa subunit) (SPase 25 kDa subunit), transcript variant 3 (LOC653566), mRNA.				chr1	28295405	28295454	TGCTTCCAACTGCGGGACAGGGAGTGGCCGTAGCGGCTTGTTGGATAAGT
MXI1	2490463	0.0371207	down	-1.34389	1.67094	1.24453	4601	Homo sapiens MAX interactor 1 (MXI1), transcript variant 2, mRNA.	GO:0045449|GO:0045449|GO:0045449|GO:0045449|GO:0006355|GO:0008285|GO:0042994	GO:0005634|GO:0005634|GO:0005634|GO:0005634|GO:0005634	GO:0030528|GO:0030528|GO:0030528|GO:0030528|GO:0003677|GO:0003714|GO:0030528	chr10	112036209	112036258	GGCCTTCGCTTGCATTATTTGGGCCTTCATTCAGATGAACTTGAGGTGCC
MRPL45	3710719	0.0263414	down	-1.34247	-0.162965	-0.587856	84311	Homo sapiens mitochondrial ribosomal protein L45 (MRPL45), nuclear gene encoding mitochondrial protein, mRNA.	GO:0006412|GO:0006886	GO:0005739|GO:0005744|GO:0005840	GO:0003735|GO:0015450	chr17	33732424	33732473	CTGGGCATGGACCAGCCTTCAGATGGCAGAAGTGGAAGATGAGCCTACTT
ZNF626	630767	0.0263414	down	-1.34236	0.0625286	-0.362245	199777	Homo sapiens zinc finger protein 626 (ZNF626), transcript variant 2, mRNA.	GO:0006355|GO:0006350|GO:0006355	GO:0005622|GO:0005622|GO:0005634	GO:0003676|GO:0003677|GO:0008270|GO:0046872	chr19	20828217	20828501	GCCAAACCCTCAGTGAGCTTCCTTCAAGTTCACAGTGAGAGCCAAAGTCC
BTN3A1	3130600	0.017798	down	-1.34218	-0.231164	-0.655738	11119	Homo sapiens butyrophilin, subfamily 3, member A1 (BTN3A1), mRNA.	GO:0006629	GO:0016020|GO:0016021		chr6	26523207	26523256	TAATCCCGTTATGGACTCTGTCTCCAGGAGAGGGGTCTATCCACCCCTGC
CNTFR	6560487	0.0284629	down	-1.34135	6.07796	5.65428	1271	Homo sapiens ciliary neurotrophic factor receptor (CNTFR), transcript variant 2, mRNA.	GO:0008284|GO:0007165|GO:0007399|GO:0008284	GO:0016020|GO:0005886|GO:0019898|GO:0031225	GO:0004872|GO:0004896|GO:0005515|GO:0004872|GO:0004897|GO:0019955	chr9	34552022	34552160	TCCCCTGACCCTGCTCCTATCCCACAGTATTTAATGCCCTGTCAGTCCCT
TncRNA	6200193	0.0269345	down	-1.3403	0.387965	-0.0345875	283131	PREDICTED: Homo sapiens trophoblast-derived noncoding RNA (TncRNA), misc RNA.				chr11	64968034	64968083	AGGCCAGAGCTTTGTTGCTTCATCGGCAGGTTGGGACTTAGATGGCCGTG
ZAK	4670059	0.018703	down	-1.33833	-2.26344	-2.68388	51776	Homo sapiens sterile alpha motif and leucine zipper containing kinase AZK (ZAK), transcript variant 2, mRNA.				chr2	173799586	173799635	CTCCACCTTTGTTTGCACTCTGTTGCCTGTGAGGAGCTTTCTGGCATGTG
DRD4	7050709	0.02354	down	-1.33743	1.80264	1.38318	1815	Homo sapiens dopamine receptor D4 (DRD4), mRNA.	GO:0007186|GO:0007186|GO:0007186|GO:0007186|GO:0007186|GO:0006874|GO:0007194|GO:0007195|GO:0007268|GO:0014075|GO:0050709|GO:0051927	GO:0016021|GO:0016021|GO:0016021|GO:0016021|GO:0016021|GO:0005886|GO:0005887	GO:0004872|GO:0004872|GO:0004952|GO:0004872|GO:0004952|GO:0004872|GO:0004952|GO:0004872|GO:0004952|GO:0004872|GO:0004952|GO:0001591|GO:0004872|GO:0008144	chr11	630535	630584	GTCATCTACACTGTCTTCAACGCCGAGTTCCGCAACGTCTTCCGCAAGGC
PTGFRN	5550332	0.0383427	down	-1.3374	0.0794902	-0.339944	5738	Homo sapiens prostaglandin F2 receptor negative regulator (PTGFRN), mRNA.		GO:0005783|GO:0005789|GO:0005794|GO:0016020|GO:0016021	GO:0005515|GO:0005515	chr1	117334202	117334251	CACCGATGACAACAGAGGAAGAAGGGAACTGGGATTTGGGTAAGTTCTCC
ORAI3	6840576	0.0345576	down	-1.33723	-0.255321	-0.674564	93129	Homo sapiens ORAI calcium release-activated calcium modulator 3 (ORAI3), mRNA.		GO:0016020|GO:0016021		chr16	30873522	30873571	GGTGCCTGACCCACTGCCCTAGCCCCACGCTATGCACCAAACTTGTTCTC
TMEM107	1300576	0.0375496	down	-1.33587	0.582421	0.16464	84314	Homo sapiens transmembrane protein 107 (TMEM107), transcript variant 1, mRNA.		GO:0016020|GO:0016021		chr17	8017611	8017660	CTGAGTGCAGAATGTCGGCTGTTTGTCTGTATCGTCAGGTGGGATAATCC
BCHE	7400433	0.0296975	down	-1.33568	2.78859	2.37102	590	Homo sapiens butyrylcholinesterase (BCHE), mRNA.	GO:0050783	GO:0005576|GO:0005641|GO:0005783|GO:0016020|GO:0005641|GO:0005783|GO:0016020	GO:0001540|GO:0004104|GO:0016787|GO:0019899|GO:0004091	chr3	166973917	166973966	GGGAGTGGAAAGCAGGATTCCATCGCTGGAACAATTACATGATGGACTGG
MOSC2	2140167	0.0497846	down	-1.33549	-0.400508	-0.817882	54996	Homo sapiens MOCO sulphurase C-terminal domain containing 2 (MOSC2), mRNA.	GO:0055114	GO:0005739|GO:0005741|GO:0016020	GO:0016491|GO:0030151|GO:0030170	chr1	219021878	219023913	GGATCCACTAGGGTGATATGGCTTCAGCAACCAGGAGGGATTGACTGAGA
FLJ40852	3130619	0.0341297	down	-1.33529	0.471136	0.0539797	285962	Homo sapiens hypothetical protein FLJ40852 (FLJ40852), mRNA.				chr7	141050871	141050920	AGGGGTCTCCAGTGCTCCTGACTCCTCACAGCTCTGTTCCTATGACAAGG
ELP2	4280129	0.0197851	down	-1.33451	-0.873267	-1.28958	55250	Homo sapiens elongation protein 2 homolog (S. cerevisiae) (ELP2), mRNA.	GO:0006350|GO:0006357	GO:0005634|GO:0005634|GO:0005634|GO:0005737|GO:0008023	GO:0003677|GO:0016944	chr18	32004121	32005020	CTGTCAGCGTCTGCCCAGTGCTCCACCCTTCTCAACGATACGTGGTTGCA
RBPJL	6550292	0.00949059	down	-1.33373	0.643898	0.228436	11317	Homo sapiens recombination signal binding protein for immunoglobulin kappa J region-like (RBPJL), mRNA.	GO:0006355|GO:0007165	GO:0005634	GO:0003700|GO:0005515	chr20	43379801	43379850	ACTTCTCCCACAGGCCCAGCAGGACGCAGTCCTGAGGATCAGGGATTCTA
GLIS3	6560017	0.0394986	down	-1.3333	2.22026	1.80525	169792	Homo sapiens GLIS family zinc finger 3 (GLIS3), transcript variant 2, mRNA.	GO:0000122|GO:0006350|GO:0006355|GO:0045944	GO:0005622|GO:0005634|GO:0005622	GO:0003677|GO:0003704|GO:0008270|GO:0046872|GO:0003676|GO:0008270	chr9	3826463	3826512	AAGTCCAGCTTTAAAATGCTGCATTGCTTTGGGCCAGAGCTGTAGCCTGG
LOC643384	4850494	0.0100785	down	-1.33278	-2.17453	-2.58897	643384	PREDICTED: Homo sapiens hypothetical LOC643384 (LOC643384), mRNA.				chr4	4195706	4195755	TCTCGGCCGCGGACCCGGGCCGCGTGTGAGCGCGCTTTGCACCTCCTATC
EFHB	2470113	0.0233424	down	-1.33141	1.07993	0.666977	151651	Homo sapiens EF-hand domain family, member B (EFHB), mRNA.			GO:0005509|GO:0005509	chr3	19949798	19949847	CCCCATTTGTGGTGTTCCAACCATTCGATCTGACATTCCTGCTCCCCGAA
NMT2	3930382	0.0365533	down	-1.32942	-1.17188	-1.58268	9397	Homo sapiens N-myristoyltransferase 2 (NMT2), mRNA.	GO:0006499|GO:0009249|GO:0006499|GO:0006499	GO:0005737|GO:0005794|GO:0005737|GO:0005794	GO:0004379|GO:0008415|GO:0016740|GO:0004379|GO:0008415|GO:0016740|GO:0004379	chr10	15190137	15190186	GCCTGTACCCGCGACTAACTAGACTTTTCTTGCTGTTGTGCAAAGTTCAG
C11orf31	50360	0.0376432	down	-1.32934	0.632674	0.221963	280636	Homo sapiens chromosome 11 open reading frame 31 (C11orf31), mRNA.				chr11	57267122	57267171	GGACAAAGCCAGCCTTGTGGAGTTGGTAGTCCTTGTGTTTTTCATAGCCC
LOC390183	4730368	0.0489844	down	-1.32919	-1.33381	-1.74436	390183	PREDICTED: Homo sapiens misc_RNA (LOC390183), miscRNA.							GACGTGGTTCATGTGAAAGATGCCAGTGGCAACAGATTTGCCACTCGACC
FEZ1	2350019	0.0272968	down	-1.32862	1.52946	1.11953	9638	Homo sapiens fasciculation and elongation protein zeta 1 (zygin I) (FEZ1), transcript variant 2, mRNA.	GO:0007155|GO:0007399|GO:0007411	GO:0005737|GO:0005813|GO:0005886	GO:0005515|GO:0005515|GO:0005515|GO:0005515|GO:0005515|GO:0043015	chr11	125358241	125358290	GGTGGGGGATATGTTTTAAGACCCCCAGTTAATGCCTGAAACCGCTGCTA
TMEM132B	6370093	0.0176487	down	-1.32858	0.234238	-0.175645	114795	Homo sapiens transmembrane protein 132B (TMEM132B), mRNA.		GO:0016020|GO:0016021		chr12	124709331	124709380	CTGGCCTAGAAAGGCTGTGGCTTATGTTGGGATTGATGATGGAATCTGCC
LOC645863	4890072	0.0114063	down	-1.32724	0.634573	0.226144	645863	PREDICTED: Homo sapiens hypothetical protein LOC645863 (LOC645863), mRNA.				chr8	7913869	7913918	CCCTGTGGCGGGAGGTGAGACATGTTGGCAGTAATGCTGCCTTGCTTTGT
BRE	1400450	0.031533	down	-1.32717	-0.173007	-0.581362	9577	Homo sapiens brain and reproductive organ-expressed (TNFRSF1A modulator) (BRE), transcript variant 3, mRNA.	GO:0006511|GO:0006915|GO:0006974|GO:0007165|GO:0045768	GO:0000152|GO:0005634|GO:0005737	GO:0000268|GO:0005164|GO:0005515|GO:0005515	chr2	28152762	28205677	CCTGCCTCTGTTTTTCCCTCGAGACCAGCCAACTCTCACATTTCAGTCCG
ADAM17	5260546	0.0302327	down	-1.32708	1.31073	0.902466	6868	Homo sapiens ADAM metallopeptidase domain 17 (ADAM17), mRNA.	GO:0006508|GO:0007219|GO:0007267	GO:0005737|GO:0005887|GO:0016020	GO:0004222|GO:0005515|GO:0008233|GO:0008270|GO:0017124|GO:0046872	chr2	9629440	9629489	CCTGTAATCCCAGCACTTGGAGAGGCTGAGGTTGCGCCACTACACTCCAG
SPIC	3360722	0.0224334	down	-1.327	0.509671	0.101502	121599	Homo sapiens Spi-C transcription factor (Spi-1/PU.1 related) (SPIC), mRNA.	GO:0006350|GO:0006355	GO:0005634	GO:0003700|GO:0043565	chr12	100404489	100404538	CGGAGGAAGCTGACTTACCAGTTCAGTGAGGCCATTCTCCAAAGACTCTC
GRINL1A	6980154	0.0377176	down	-1.326	0.118908	-0.288174	81488	Homo sapiens glutamate receptor, ionotropic, N-methyl D-aspartate-like 1A (GRINL1A), transcript variant 2, mRNA.				chr15	55786398	55788676	GGAGCTGCGGGAAATGTTGAAGCGCCAGGAGAGACTTTTGCGCAACGAGT
TPP1	670113	0.0379827	down	-1.32556	0.485069	0.0784664	1200	Homo sapiens tripeptidyl peptidase I (TPP1), mRNA.	GO:0006508|GO:0006508|GO:0006629|GO:0007040|GO:0007399|GO:0030163|GO:0043171|GO:0043171|GO:0045453|GO:0050885	GO:0005625|GO:0005739|GO:0005764|GO:0005764|GO:0042470	GO:0004252|GO:0005515|GO:0008233|GO:0008233|GO:0008240|GO:0008240|GO:0008240|GO:0008240|GO:0008240|GO:0008240	chr11	6634194	6634243	CAGTGCTTGGCACCTGGAAGTAGGTGGCAGATGTTAACGCCCTTCCTCCC
PQLC3	7000382	0.0314994	down	-1.32529	-2.49961	-2.90592	130814	Homo sapiens PQ loop repeat containing 3 (PQLC3), mRNA.		GO:0016020|GO:0016021		chr2	11235970	11236019	GCTGGCTTGAGTTTGTACCAAAACAGTCCTTCAACTTTGCACTGTGCCTT
TSPAN31	5670577	0.0147912	down	-1.32489	0.302419	-0.103454	6302	Homo sapiens tetraspanin 31 (TSPAN31), mRNA.	GO:0008284	GO:0005624|GO:0005887|GO:0016020		chr12	56428139	56428188	TCAGTCAAGGGGCTCCACTGACTTCCTAGGCCCTGTAATTTAACCAGTCT
NRP1	5720424	0.0468489	down	-1.32488	-1.46127	-1.86713	8829	Homo sapiens neuropilin 1 (NRP1), transcript variant 1, mRNA.	GO:0001569|GO:0007155|GO:0007165|GO:0007267|GO:0007275|GO:0007399|GO:0007411|GO:0007413|GO:0007507|GO:0008284|GO:0009887|GO:0016358|GO:0030154|GO:0030517|GO:0048010|GO:0007155|GO:0007155|GO:0007155|GO:0001569|GO:0007155|GO:0007411|GO:0007413|GO:0007507|GO:0016358|GO:0030517|GO:0048010|GO:0007155|GO:0001569|GO:0007411|GO:0007413|GO:0007507|GO:0016358|GO:0030517|GO:0048010	GO:0005576|GO:0005886|GO:0016021|GO:0016020|GO:0005783|GO:0016020	GO:0004872|GO:0005021|GO:0017154|GO:0042802|GO:0017154|GO:0042802|GO:0017154|GO:0042802	chr10	33507128	33507177	CCTTCCCACATTGCTAGACGTCTCACTCAAAGACATTTGTTGGGAGTCAC
DKK3	4070133	0.0404255	down	-1.32405	-0.119621	-0.524578	27122	Homo sapiens dickkopf homolog 3 (Xenopus laevis) (DKK3), transcript variant 1, mRNA.	GO:0007275|GO:0009653|GO:0030178	GO:0005576|GO:0005615		chr11	11985252	11985301	GCGACTGCGAACACTGAACTCTACGCCACTCCACAAATGATGTTTTCAGG
PDE1A	5900189	0.0302327	down	-1.32381	0.804169	0.399477	5136	Homo sapiens phosphodiesterase 1A, calmodulin-dependent (PDE1A), transcript variant 2, mRNA.	GO:0007165	GO:0005575	GO:0004117|GO:0005516|GO:0016787	chr2	183032928	183032977	CCGGGCTCAACTGCTACCGAACAGATTCATCTAGTGGCTACATCAGCACC
LGR5	7150403	0.0224601	down	-1.32348	0.407973	0.00363874	8549	Homo sapiens leucine-rich repeat-containing G protein-coupled receptor 5 (LGR5), mRNA.	GO:0007165|GO:0007186|GO:0007186	GO:0005886|GO:0005887|GO:0016021	GO:0004872|GO:0005515|GO:0016500|GO:0004872|GO:0005515|GO:0016500	chr12	70264671	70264720	ACCAGCTCCAGCATCACTTATGACCTGCCTCCCAGTTCCGTGCCATCACC
SAP18	2900435	0.0207908	down	-1.32339	1.35369	0.949451	10284	Homo sapiens Sin3A-associated protein, 18kDa (SAP18), mRNA.	GO:0006350|GO:0006357	GO:0000118	GO:0003714|GO:0005515|GO:0005515|GO:0005515	chr13	20620710	20620759	TCTGTGGAATTGGTGTCCCTGTTAGCAATGGCAGAGACCAGCCTGGAGCC
PDE8B	580187	0.00949059	down	-1.32136	1.72077	1.31874	8622	Homo sapiens phosphodiesterase 8B (PDE8B), transcript variant 3, mRNA.	GO:0000160|GO:0006198|GO:0006355|GO:0009187	GO:0005575	GO:0000156|GO:0000287|GO:0004114|GO:0016787|GO:0030145	chr5	76717752	76717801	GCTGGTGGGTGCCCTCTCTAGACTGGTATCAGCAGCCTGTGTAACCCCTT
NDRG2	4210411	0.0355848	down	-1.32032	1.70404	1.30315	57447	Homo sapiens NDRG family member 2 (NDRG2), transcript variant 6, mRNA.	GO:0007275|GO:0007399|GO:0030154	GO:0005634|GO:0005737|GO:0005737|GO:0005737|GO:0005813|GO:0005829	GO:0003674	chr14	21485403	21485452	GCTGAGGGGTAAGAGGTTGTTGTAGTTGTCCTGGTGCCTCCATCAGACTC
C11orf54	2470463	0.0401862	down	-1.31989	0.863735	0.463312	28970	Homo sapiens chromosome 11 open reading frame 54 (C11orf54), mRNA.		GO:0005634	GO:0008270|GO:0016787|GO:0046872	chr11	93135466	93135515	CTAGTTGGCTAGCCATAATTCCTCCCTTGTTTCGATTGCCAGTTAGAAGC
CBX4	3830170	0.0358045	down	-1.31976	1.48439	1.08412	8535	Homo sapiens chromobox homolog 4 (Pc class homolog, Drosophila) (CBX4), mRNA.	GO:0000122|GO:0006333|GO:0006350|GO:0006355|GO:0006511|GO:0006916|GO:0016568	GO:0000785|GO:0005634	GO:0003682|GO:0003714|GO:0051219	chr17	77807340	77807389	GAAATGTATTGTTTGAGCTCAAAAGGCCCGACCACCCCCCTTCGGGCTGC
SPATA7	3130687	0.0327973	down	-1.31973	1.17682	0.776575	55812	Homo sapiens spermatogenesis associated 7 (SPATA7), transcript variant 1, mRNA.				chr14	87929511	87929560	CTCTCAGACTAAGCACTCTCCAGCTGGTCAAGAATCACATGGCTGTTCAC
NCKAP5	7400270	0.0238977	down	-1.31786	2.66728	2.26909	344148	Homo sapiens NCK-associated protein 5 (NCKAP5), transcript variant 1, mRNA.				chr2	133437910	133468241	CAACAGGGCCTGCCAAAAAATCGGAGGGTTCCTCCTCATCTCCATCTCAC
NCRNA00092	2360468	0.0278566	down	-1.31768	0.695946	0.297946	100188953	Homo sapiens non-protein coding RNA 92 (NCRNA00092), non-coding RNA.				chr9	98782052	98782101	TCACGTGAACTGCCTCCATGATTGTAAGCTTCCTGAGGCCTCCCCAGCTA
LGALS9B	610682	0.0126478	down	-1.31644	0.429285	0.0326427	284194	Homo sapiens lectin, galactoside-binding, soluble, 9B (LGALS9B), mRNA.				chr17	20358632	20358681	CTTCTCCACGGTGCCGTTCTCCCAGCCTGTCTGTTTCCCACCCAGGCCCA
UFSP2	4250288	0.0118623	down	-1.31415	0.137989	-0.256136	55325	Homo sapiens UFM1-specific peptidase 2 (UFSP2), mRNA.	GO:0006511		GO:0008233|GO:0008234|GO:0016790	chr4	186558611	186561675	CCGGTGCTGAAGACCTGCAAGTTATTTTGGAAAAGGGCTGGTGCGGATGG
NUP43	70593	0.0265439	down	-1.31354	0.0892269	-0.304228	348995	Homo sapiens nucleoporin 43kDa (NUP43), transcript variant 1, mRNA.	GO:0015031|GO:0051028|GO:0065002	GO:0005634|GO:0005635|GO:0005643|GO:0016020		chr6	150087787	150087836	GGGTTGCAGGATCTTAGAGATAGAAAGTACCTTGGTGATCATCTCCAGCC
C2CD2	6770209	0.0405849	down	-1.31302	-0.664004	-1.05689	25966	Homo sapiens C2 calcium-dependent domain containing 2 (C2CD2), transcript variant 1, mRNA.		GO:0005576|GO:0005634|GO:0005737		chr21	43305264	43305313	AGCCTGCACACGGGCTTGGGTGGGTTCCTTTGGAGAAGATGTGGCTGGAA
OXSR1	4920669	0.0306527	down	-1.31273	0.170766	-0.221799	9943	Homo sapiens oxidative-stress responsive 1 (OXSR1), mRNA.	GO:0006468|GO:0006979|GO:0007243	GO:0005737	GO:0000166|GO:0000287|GO:0004674|GO:0005524|GO:0016740|GO:0042802	chr3	38270454	38270503	GAGTGCACCTCTTTGACTAGGTCCCAGGATCCCCTTGTCCCTGGAGTAGG
FAM116A	1740685	0.0464699	down	-1.31244	-0.158755	-0.551007	201627	PREDICTED: Homo sapiens family with sequence similarity 116, member A (FAM116A), mRNA.							AATTTGCACTGGGAACCTGGGAAAGAGTGACTGATAATTTTTGGTGCGTG
PACRG	6580600	0.0158977	down	-1.31187	2.02613	1.63451	135138	Homo sapiens PARK2 co-regulated (PACRG), mRNA.				chr6	163656436	163656485	GAAGCATGGGTTCAGCAGTGCCTCTCTAGCAGCTGTGCGGAATAATGTGC
DENND5A	2070373	0.0172267	down	-1.31151	0.323014	-0.0682138	23258	Homo sapiens DENN/MADD domain containing 5A (DENND5A), mRNA.				chr11	9167249	9167298	CTGCGCGGGAAGCCCCATGCTCCAATCAAAGGGATTTTTAGTAGTGCCTC
SIRT2	4860411	0.0250632	down	-1.31038	0.493035	0.103049	22933	Homo sapiens sirtuin (silent mating type information regulation 2 homolog) 2 (S. cerevisiae) (SIRT2), transcript variant 1, mRNA.	GO:0000183|GO:0006348|GO:0006355|GO:0006471|GO:0006980|GO:0007049|GO:0007067|GO:0007096|GO:0016481|GO:0016481|GO:0016575|GO:0042325|GO:0045843|GO:0045843|GO:0051301	GO:0005677|GO:0005737|GO:0005737|GO:0005856|GO:0005874|GO:0005874	GO:0003677|GO:0008134|GO:0008134|GO:0008134|GO:0008270|GO:0016787|GO:0017136|GO:0017136|GO:0035035|GO:0035035|GO:0042826|GO:0042826|GO:0042903|GO:0042903|GO:0043130|GO:0043130|GO:0046872|GO:0051287	chr19	44061299	44061348	ACGGGGCCAGGGCTACCCCAGAACTTTTAACTCTTCCAGGACAGGGAGCT
FLJ35220	160408	0.032742	down	-1.31028	0.839168	0.44929	284131	Homo sapiens hypothetical protein FLJ35220 (FLJ35220), mRNA.				chr17	76026349	76026398	GTAACCAAGCAGTGGGCCGAGACACTGAGCCGGGCAGTCAAACAGGAGCT
ZNF589	50327	0.0126478	down	-1.30991	0.48735	0.0978812	51385	Homo sapiens zinc finger protein 589 (ZNF589), mRNA.	GO:0006355	GO:0005622|GO:0005634|GO:0005634|GO:0005737	GO:0003677|GO:0008270|GO:0046872	chr3	48287141	48287190	AGAAGGAATGGCTGGTCCAGAGGCTTTTGTCCACTCCCTCTCACTGGAAG
ANKRD13A	2120224	0.00764478	down	-1.30928	-1.37855	-1.76732	88455	Homo sapiens ankyrin repeat domain 13A (ANKRD13A), mRNA.				chr12	108961374	108961423	CCGTGAGCAAAGATACTTCTTGGAATGGCTGCAGTGAGGCCGTGTCATTG
CXorf39	7380768	0.0435349	down	-1.30891	0.391128	0.00276645	139231	Homo sapiens chromosome X open reading frame 39 (CXorf39), mRNA.		GO:0005634|GO:0005737|GO:0005794		chrX	103322413	103322462	GTGGATAGCATTTTGAAGGTGACCGTGATTCTGTAGGAAGAGCTGTAATC
FCF1	60307	0.0480533	down	-1.30848	-0.542209	-0.930096	51077	Homo sapiens FCF1 small subunit (SSU) processome component homolog (S. cerevisiae) (FCF1), mRNA.	GO:0006364	GO:0005634		chr14	74272502	74272551	TGCGTGCCACCACGTCCAGCCACTGATGCTGTTTTGCCACTGATGCTGTT
C1orf19	3870112	0.0495193	down	-1.30845	0.306019	-0.0818415	116461	Homo sapiens chromosome 1 open reading frame 19 (C1orf19), mRNA.				chr1	182309649	182309698	GTGGTGCCATAGTTTGTCATCCCTGGGTCTAGGAAATAGTCAATAAACAG
B3GNT1	3400215	0.0388331	down	-1.30758	2.86434	2.47744	11041	Homo sapiens UDP-GlcNAc:betaGal beta-1,3-N-acetylglucosaminyltransferase 1 (B3GNT1), mRNA.	GO:0030311	GO:0000139|GO:0005794|GO:0016020|GO:0016021|GO:0030173	GO:0008532|GO:0016757	chr11	66112926	66112975	CTTCAAGGGTTCTGGAGGAGGGAAGGGTCTGCAGGTTCCATGGGTGACAG
TEAD2	4670398	0.0179086	down	-1.30745	1.08574	0.698986	8463	Homo sapiens TEA domain family member 2 (TEAD2), mRNA.	GO:0006355|GO:0045944|GO:0006350|GO:0006355|GO:0045944	GO:0005634|GO:0005667|GO:0005634|GO:0005667	GO:0003700|GO:0016563|GO:0003700|GO:0016563	chr19	54535779	54535828	AGTGGGTGCTAGGGTCTTGACTTTATCTCCGCTGCACAAGCAGTGTGTTG
CCDC103	6770463	0.0361897	down	-1.30723	1.2255	0.83899	388389	Homo sapiens coiled-coil domain containing 103 (CCDC103), mRNA.				chr17	40335983	40336032	GCCCACTGGCCTTGAGAGATGAGTGTGTGCCCAACCAAATGCTGGCTATA
CCDC19	6040709	0.0275789	down	-1.30662	1.24336	0.857526	25790	Homo sapiens coiled-coil domain containing 19 (CCDC19), mRNA.		GO:0005625		chr1	159842808	159842857	AACCAGCAGAAGGAAGTGCAGAACCGGATTGCCACCTTTGAGGAGGGCCG
GCAT	7560164	0.0236534	down	-1.30442	-0.5684	-0.951808	23464	Homo sapiens glycine C-acetyltransferase (2-amino-3-ketobutyrate coenzyme A ligase) (GCAT), nuclear gene encoding mitochondrial protein, mRNA.	GO:0006520|GO:0009058	GO:0005739|GO:0005743	GO:0008415|GO:0008890|GO:0016769|GO:0030170	chr22	36542575	36542624	CCGGGTACAGATCTCAGCAGTGCATAGCGAGGAAGACATTGACCGCTGCG
CREBBP	6840148	0.0248377	down	-1.30245	0.768322	0.387096	1387	Homo sapiens CREB binding protein (CREBBP), transcript variant 2, mRNA.	GO:0001666|GO:0006355|GO:0006461|GO:0007165|GO:0016573|GO:0018076|GO:0042592|GO:0044419|GO:0045941|GO:0045941	GO:0000123|GO:0005634|GO:0005737	GO:0003700|GO:0003713|GO:0003713|GO:0003713|GO:0004402|GO:0004871|GO:0004871|GO:0005524|GO:0008270|GO:0016407|GO:0016740|GO:0016887|GO:0046872|GO:0051577	chr16	3778581	3778630	GGGCGTCTCCCAGTATTACCCTGGATGATAGGAATTGACTCCGGCGTGCA
ATPBD1B	3420195	0.0323483	down	-1.30212	0.669305	0.288441	54707	Homo sapiens ATP binding domain 1 family, member B (ATPBD1B), mRNA.			GO:0000166|GO:0000166	chr1	27075239	27075288	TGAGTCACCCAGAATCCCATAACGGAAACTTTCTATGGGGTCATCTGTTT
CTSF	3930020	0.0263414	down	-1.30157	-0.267693	-0.647949	8722	Homo sapiens cathepsin F (CTSF), mRNA.	GO:0006508	GO:0005764	GO:0004197|GO:0008233	chr11	66087774	66087823	CTGCTTCCCTGCACCCCATTCCCACCCTGAAGTTCTGCACCTGCACCTTT
NDUFB4	6660451	0.0177164	down	-1.30011	0.192922	-0.185716	4710	Homo sapiens NADH dehydrogenase (ubiquinone) 1 beta subcomplex, 4, 15kDa (NDUFB4), nuclear gene encoding mitochondrial protein, mRNA.	GO:0006120|GO:0006810|GO:0006979|GO:0022900	GO:0005739|GO:0005747|GO:0016020|GO:0016021	GO:0008137	chr3	120315128	120315177	GCACTTCCTGAAGCTGAAGGTCAGCATAGACAAAGGGCCTCAGAATCGCG
LMCD1	3830093	0.0306527	up	1.30145	-3.28015	-2.90003	29995	Homo sapiens LIM and cysteine-rich domains 1 (LMCD1), mRNA.	GO:0000122|GO:0008150	GO:0005575|GO:0005634	GO:0003674|GO:0003714|GO:0005515|GO:0008270|GO:0046872	chr3	8582291	8584132	CTGCAAGGGGACTCTGGGAGGAGTTTTCCAGAATGCAATTCCGAGTGAGC
PRDM2	2690358	0.0221193	up	1.30191	0.255141	0.635767	7799	Homo sapiens PR domain containing 2, with ZNF domain (PRDM2), transcript variant 1, mRNA.	GO:0045449|GO:0045449|GO:0045449|GO:0006355|GO:0006355	GO:0005622|GO:0005634|GO:0005794|GO:0005622|GO:0005634|GO:0005794|GO:0005634|GO:0005622|GO:0005634|GO:0005794|GO:0005622|GO:0005634|GO:0005634|GO:0005794	GO:0003677|GO:0008270|GO:0030528|GO:0046872|GO:0003677|GO:0008270|GO:0030528|GO:0046872|GO:0003677|GO:0008270|GO:0030528|GO:0046872|GO:0003700|GO:0003700|GO:0008270|GO:0046872	chr1	14023863	14023912	CACCGCAGCAGCAAGGAAAGCTCACGAACCCCAAACCTGGCAAGTCACCT
EFEMP1	6900408	0.0247826	up	1.3021	-7.63019	-7.24935	2202	Homo sapiens EGF-containing fibulin-like extracellular matrix protein 1 (EFEMP1), transcript variant 2, mRNA.	GO:0007601	GO:0005576|GO:0005578	GO:0005509|GO:0005509|GO:0005515	chr2	56098001	56098050	ACCGATGTGTTTGCCCAGTCTCAAATGCCATGTGCCGAGAACTGCCCCAG
WDR46	6980554	0.0145045	up	1.30221	-1.06326	-0.682299	9277	Homo sapiens WD repeat domain 46 (WDR46), mRNA.	GO:0006418|GO:0008150|GO:0009058	GO:0005575|GO:0005737	GO:0000166|GO:0003824|GO:0004812|GO:0005524|GO:0030170	chr6	33355001	33355050	CTGGACAGATTTGTGCGCTGAGCCAGACTCCAGGGTTGCCTGGGAACAGT
GMPPA	830242	0.0162215	up	1.30287	-1.84814	-1.46644	29926	Homo sapiens GDP-mannose pyrophosphorylase A (GMPPA), transcript variant 2, mRNA.	GO:0009058		GO:0004475|GO:0008415|GO:0016740|GO:0016779	chr2	220079680	220079729	CCCTGCCGAGGTGCTCATCCTGAACTCGATTGTTCTGCCACACAAGGAGC
KISS1R	4120131	0.0250254	up	1.30319	2.45933	2.84138	84634	Homo sapiens KISS1 receptor (KISS1R), mRNA.	GO:0007165|GO:0007186|GO:0007610|GO:0008285|GO:0030336	GO:0005886|GO:0009986|GO:0016021	GO:0004872|GO:0005515|GO:0008188	chr19	871774	871823	CTCCCTCGGGAGCGGGGACTGCTGGAACAGCGGCTATTCTTCTGTTATTA
OVGP1	1820196	0.031533	up	1.30446	-0.0302982	0.353158	5016	Homo sapiens oviductal glycoprotein 1, 120kDa (OVGP1), mRNA.	GO:0005975|GO:0006032|GO:0007338|GO:0007565		GO:0003824|GO:0004568|GO:0043169	chr1	111956971	111957020	CTTCTCATCCCGGGGCAAAGCAGGCATCAAAACCAGAATAGGCCAATCTC
LOC728779	3870332	0.0295572	up	1.30464	0.340991	0.724647	728779	PREDICTED: Homo sapiens hypothetical LOC728779 (LOC728779), mRNA.				chr5	75502750	75502799	TCCTCACATCCCAGACGATGGGCGGCCAGGCAGAGACACTCCTCACTTCC
MCM10	7570181	0.0454362	up	1.30555	0.828327	1.21299	55388	Homo sapiens minichromosome maintenance complex component 10 (MCM10), transcript variant 2, mRNA.				chr10	13252902	13252951	AGTTGTATAATATGCTTGTAAAGGCTGAGGGTGAGCTGTATCTGGATGCC
UBE2Z	650372	0.0147912	up	1.30615	-1.06096	-0.675642	65264	PREDICTED: Homo sapiens ubiquitin-conjugating enzyme E2Z (putative), transcript variant 3 (UBE2Z), mRNA.	GO:0006511|GO:0006915|GO:0043687|GO:0051246|GO:0043687|GO:0051246	GO:0005634|GO:0005634|GO:0005730|GO:0005737|GO:0005737|GO:0005634|GO:0005730|GO:0005737	GO:0004842|GO:0016874|GO:0019787				CCTTGTGTATTTTCACCCCAGCCTGTAGTCCTCCTCACTTCAACCCCAGG
FBLN5	5690639	0.0153913	up	1.30726	-4.67923	-4.29268	10516	Homo sapiens fibulin 5 (FBLN5), mRNA.	GO:0007155|GO:0007160	GO:0005576|GO:0005578|GO:0005625|GO:0005737	GO:0005178|GO:0005509|GO:0005515	chr14	91406198	91406247	AGAATGAGAGCGACACAGACGTTAGGCATTTCCTGCTGAACGTTTCCCCG
KLHL4	1510767	0.0371574	up	1.30807	0.53905	0.926487	56062	Homo sapiens kelch-like 4 (Drosophila) (KLHL4), transcript variant 1, mRNA.		GO:0005737|GO:0005856	GO:0003779|GO:0005515	chrX	86811419	86811468	AGTCCCAACCTAAATGATGGAAGGAGCATCTCCCCTCTTGTCTGTGGAAG
MAPK4	4860403	0.0397584	up	1.30858	2.03555	2.42355	5596	Homo sapiens mitogen-activated protein kinase 4 (MAPK4), mRNA.	GO:0006468|GO:0007049		GO:0000166|GO:0004674|GO:0004707|GO:0005524|GO:0016740	chr18	46511729	46511778	CCCCCAACACTCCCAAAGATACCCACAGGAAGTCCAGCCAGTTTCCAGGT
PRR5	5570445	0.0121768	up	1.30896	-1.83132	-1.4429	55615	Homo sapiens proline rich 5 (renal) (PRR5), transcript variant 5, mRNA.				chr22	43511838	43511887	GGGGGTGTCCATGTGGCGTGTGTGTGAGTGAGACTTTTTTACTGCGTCCC
TLN2	1770026	0.0211038	up	1.30907	-0.938304	-0.549758	83660	Homo sapiens talin 2 (TLN2), mRNA.	GO:0007016|GO:0007043|GO:0007155|GO:0009168	GO:0001726|GO:0005737|GO:0005886|GO:0005911|GO:0005925|GO:0015629|GO:0045202	GO:0003779|GO:0005200|GO:0005515|GO:0019239	chr15	60920414	60920463	CCCGCCCCTGTTTGCACGCTTTCTTGCCTCCGTGTGTAAGCTCCTTGTAC
LOC728888	1990553	0.0471032	up	1.30967	0.108269	0.497472	728888	PREDICTED: Homo sapiens similar to Protein KIAA0220 (LOC728888), mRNA.				chr16	29301000	29301049	AAACGTCAGCTCACTCCCCTTCCACCCTCAGCTCCACCCTCAGCAGATGA
IKBKG	520358	0.0445356	up	1.31033	-0.767679	-0.377744	8517	Homo sapiens inhibitor of kappa light polypeptide gene enhancer in B-cells, kinase gamma (IKBKG), transcript variant 2, mRNA.	GO:0001782|GO:0006350|GO:0006355|GO:0006917|GO:0006955|GO:0007250|GO:0044419|GO:0050852|GO:0050852|GO:0001782|GO:0007250	GO:0005634|GO:0005829|GO:0005829|GO:0008385|GO:0005622|GO:0005737	GO:0004871|GO:0005515|GO:0008270|GO:0046872|GO:0016301	chrX	153446310	153446359	CGGGTGCTCTCCTTTTGGGCTGCATGCTATTCCATTTTGCAGCCAGACCG
FOXD3	3850139	0.0315288	up	1.31105	0.393459	0.784177	27022	Homo sapiens forkhead box D3 (FOXD3), mRNA.	GO:0000122|GO:0001829|GO:0001892|GO:0006350|GO:0006355|GO:0007275|GO:0045944	GO:0005634	GO:0003700|GO:0005515|GO:0043565	chr1	63562621	63562670	TGTCGCTGAGCCGGACGACTGCCACCATCGCGCCCATTCTTAGCGTGCCA
KCNK1	4810703	0.0287179	up	1.31115	-1.16168	-0.770857	3775	Homo sapiens potassium channel, subfamily K, member 1 (KCNK1), mRNA.	GO:0006811|GO:0006813|GO:0006813|GO:0006811|GO:0006813	GO:0005768|GO:0016020|GO:0016021|GO:0016020|GO:0016021|GO:0008076|GO:0016020|GO:0016021	GO:0005216|GO:0005267|GO:0005515|GO:0005216|GO:0005267|GO:0005242|GO:0005244|GO:0005267|GO:0030955	chr1	231874087	231874136	GCTGTGACCCCAGCAGGATGTCTAATATGTGAGGAAATGAGATGTCCACC
SNRPN	1740273	0.0498902	up	1.31172	1.6782	2.06966	6638	Homo sapiens small nuclear ribonucleoprotein polypeptide N (SNRPN), transcript variant 2, mRNA.	GO:0008380	GO:0005634|GO:0005681|GO:0030532	GO:0003723|GO:0042802	chr15	22774558	22774695	GGTCCACCTCCCCCAGGAATGCGTCCACCAAGACCTTAGCATACTGTTGA
ARFGAP3	5090056	0.0284447	up	1.31391	-0.488497	-0.0946258	26286	Homo sapiens ADP-ribosylation factor GTPase activating protein 3 (ARFGAP3), mRNA.	GO:0006886|GO:0009306|GO:0016192|GO:0032312|GO:0032312|GO:0032312	GO:0000139|GO:0005634|GO:0005737|GO:0005794|GO:0005829|GO:0016020	GO:0008060|GO:0008270|GO:0008565|GO:0046872|GO:0008060|GO:0008270|GO:0008060|GO:0008270	chr22	41523100	41523149	GCGGATGCTGGATGGGCCTGCAGAAACAACACTCACCACACACACTTCCT
PLSCR3	6940255	0.0247376	up	1.3149	-1.51329	-1.11834	57048	Homo sapiens phospholipid scramblase 3 (PLSCR3), mRNA.	GO:0017121|GO:0042593|GO:0042632	GO:0005886|GO:0016021	GO:0005509|GO:0017124|GO:0017128	chr17	7293131	7293180	GGGCCCTGCCTTCAGCTGGTGCTTGCTGCGATTCCTGTGCCTTATGTAAC
SDHAP2	5130379	0.0385098	up	1.31779	0.247201	0.645326	727956	Homo sapiens succinate dehydrogenase complex, subunit A, flavoprotein pseudogene 2 (SDHAP2), non-coding RNA.				chr3	195415570	195415619	GAGGGTGTCGAGAATGCCTCCTACGTGACGGAAAGCAGATCCGTGGTTCC
ZBED4	5490014	0.0361914	up	1.31805	1.31765	1.71605	9889	Homo sapiens zinc finger, BED-type containing 4 (ZBED4), mRNA.			GO:0003677|GO:0008270|GO:0046872|GO:0046983	chr22	48667634	48667683	GCATCTCCACGCTCTGAAGCTGTCTTTCAAAATGTGTGCACTGACCCCCT
DOK5	5860386	0.024615	up	1.31903	1.06492	1.46439	55816	Homo sapiens docking protein 5 (DOK5), mRNA.	GO:0000165|GO:0007169|GO:0007399		GO:0005066|GO:0005158	chr20	52525907	52525956	TAATGACATAGTGAAGCAAGGGTACGTGAGGATCCGGAGCAGACGCCTCG
TMEM158	3130220	0.0153898	up	1.31921	0.915059	1.31473	25907	Homo sapiens transmembrane protein 158 (TMEM158), mRNA.		GO:0016020|GO:0016021		chr3	45266007	45266056	GAACCTTTTCCAAGTTGATCTATCCAGTGACGTGGCCTGGTGGGCGTTTC
EXTL3	10184	0.0485583	up	1.32013	0.99416	1.39484	2137	Homo sapiens exostoses (multiple)-like 3 (EXTL3), mRNA.		GO:0005783|GO:0005789|GO:0016020|GO:0016021	GO:0001888|GO:0016757|GO:0030145|GO:0046872	chr8	28610872	28610921	GTTCTCTGGGTGGCCGGCTTGCTGCTCCGGTTTGGGCTGTCTTACCATAA
DBNL	2140671	0.0355268	up	1.32142	-0.160923	0.241169	28988	Homo sapiens drebrin-like (DBNL), transcript variant 2, mRNA.	GO:0006897|GO:0006955|GO:0007257|GO:0016601	GO:0005622|GO:0005737|GO:0005856|GO:0005938|GO:0030027	GO:0003779|GO:0008047|GO:0042802	chr7	44067760	44067809	GCCTTGGCCTGTTGTCTTCCCCTATTTTCTGTCCCAGCTCATCCGTGTCT
GPC3	1340593	0.0250632	up	1.32146	0.6586	1.06073	2719	Homo sapiens glypican 3 (GPC3), mRNA.	GO:0001658|GO:0008285|GO:0009887|GO:0030513|GO:0045926|GO:0009653	GO:0005578|GO:0005737|GO:0005794|GO:0005886|GO:0031225|GO:0005578|GO:0005737|GO:0005794|GO:0005886|GO:0031225|GO:0005576|GO:0005578|GO:0005737|GO:0005794|GO:0005886|GO:0005887|GO:0031225		chrX	132497888	132497937	GGCAACTCCGAAGGACAACGAGATAAGCACCTTTCACAACCTCGGGAACG
SOCS3	4230102	0.0250632	up	1.32194	-0.348672	0.0539888	9021	Homo sapiens suppressor of cytokine signaling 3 (SOCS3), mRNA.	GO:0001558|GO:0001932|GO:0006511|GO:0006916|GO:0007242|GO:0007259|GO:0046627		GO:0004860|GO:0005515	chr17	76353553	76353602	CCATGGAGAGGGACCCAGCATAGGAAAGCCACATACTCAGCCTGGATGGG
RACGAP1	3990121	0.0376432	up	1.32248	-0.199727	0.203514	29127	Homo sapiens Rac GTPase activating protein 1 (RACGAP1), mRNA.	GO:0000910|GO:0000915|GO:0006811|GO:0007049|GO:0007108|GO:0007242|GO:0007283|GO:0007405|GO:0008272|GO:0009790|GO:0030154	GO:0001669|GO:0005622|GO:0005634|GO:0005737|GO:0005819|GO:0005874	GO:0005096|GO:0008022|GO:0008270|GO:0019992|GO:0043014|GO:0043015|GO:0046872|GO:0048487	chr12	48669877	48669926	CCCTACCTATCTGATAAGATTAGCTTGTCTCAGGGTGGGAAGTGGGAGGG
TMEM43	2510392	0.0269026	up	1.32327	-1.11321	-0.709096	79188	Homo sapiens transmembrane protein 43 (TMEM43), mRNA.		GO:0005794|GO:0016020|GO:0016021		chr3	14159787	14159836	CTGAAACCAGAGATCTGTAATCATCTCTATTGGCCTGGGGTGCCTGTGCT
C1orf162	7050719	0.0271931	up	1.32349	0.0948852	0.499237	128346	Homo sapiens chromosome 1 open reading frame 162 (C1orf162), mRNA.		GO:0016020|GO:0016021		chr1	111822501	111822550	CCCTTGGGGGCATAGACTGCCTTCCTTGGACCCTTCCAAAGTGTGTGGTA
SFRS14	5090253	0.0250632	up	1.3236	0.127634	0.532104	10147	Homo sapiens splicing factor, arginine/serine-rich 14 (SFRS14), transcript variant 1, mRNA.	GO:0006397|GO:0008380	GO:0005622|GO:0005634	GO:0003723	chr19	18964481	18964530	GGCTAGGGCATCAGCCACAGAACTGAGCGGGAAATGCCACTTGTATTGGC
HMHA1	6380022	0.0342206	up	1.32376	-0.50735	-0.102706	23526	Homo sapiens histocompatibility (minor) HA-1 (HMHA1), mRNA.	GO:0007242	GO:0005622	GO:0005096|GO:0008270|GO:0019992|GO:0046872	chr19	1037414	1037463	ATTCTGGGAGCCGTGGATGGGGGCGGAGCTGGGGTTTGGTGCAGTTTCCA
MCM3	6650053	0.0257869	up	1.32394	0.491005	0.895841	4172	Homo sapiens minichromosome maintenance complex component 3 (MCM3), mRNA.	GO:0006260|GO:0006260|GO:0006270|GO:0006350|GO:0006355|GO:0007049	GO:0005634|GO:0005730|GO:0005634|GO:0005654|GO:0005654|GO:0005654|GO:0005654|GO:0005654|GO:0005654|GO:0005654|GO:0005658|GO:0005730|GO:0005737	GO:0000166|GO:0003677|GO:0005524|GO:0000166|GO:0003677|GO:0005515|GO:0005515|GO:0005515|GO:0005515|GO:0005515|GO:0005515|GO:0005515|GO:0005524|GO:0017111	chr6	52236896	52236945	GGCTTTGGGTGGTTCCAATTGGTGGAGAGAAGCTCTGAGGCACGTCATGC
NTN4	3190021	0.0265439	up	1.32444	-1.1999	-0.794515	59277	Homo sapiens netrin 4 (NTN4), mRNA.	GO:0016322	GO:0005576|GO:0005604	GO:0005515	chr12	96052096	96052145	GCGTGAAGTCTCAGCTTTGAGCTGGAGGCTAGATTCCAAGATGACAGCCA
KIAA1641	4570075	0.0385403	up	1.32467	0.632977	1.03861	57730	PREDICTED: Homo sapiens KIAA1641, transcript variant 7 (KIAA1641), mRNA.							GGCACCCAAGCGATCCTTTTGCCTGGAATCCCAAAGTGTCAGATTTACTG
MKI67	20364	0.0267093	up	1.32479	-0.0155489	0.390218	4288	Homo sapiens antigen identified by monoclonal antibody Ki-67 (MKI67), mRNA.	GO:0007049|GO:0008283	GO:0005634|GO:0005730	GO:0000166|GO:0005515|GO:0005524	chr10	129785235	129785284	CCTTAGGCAGGCACCTCCAACCACCACACACTCCCTGCTGTTTTCCCTGC
SEPT4	4670458	0.0137402	up	1.32483	-0.452839	-0.0470293	5414	Homo sapiens septin 4 (SEPT4), transcript variant 2, mRNA.	GO:0000910|GO:0007049|GO:0007049	GO:0005634|GO:0005737	GO:0000166|GO:0003924|GO:0005198|GO:0005525|GO:0005525	chr17	56597664	56597713	TCTGCTCAGGCCCCTTCAGCTACTGCCACTTCGCCTTACATCCCTGCTGA
ADAMTS1	6900086	0.0203986	up	1.32494	-4.45045	-4.04452	9510	Homo sapiens ADAM metallopeptidase with thrombospondin type 1 motif, 1 (ADAMTS1), mRNA.	GO:0006508|GO:0007229|GO:0008285	GO:0005576|GO:0005578	GO:0004222|GO:0004497|GO:0005506|GO:0008201|GO:0008233|GO:0008270|GO:0009055|GO:0020037|GO:0046872	chr21	28208968	28209017	GCCGGAACAAAAATGAGGTGTGTAGAACAGGGTCCCACAGGTTTGGGGAC
SHMT1	2690528	0.0488273	up	1.32528	0.0424166	0.448713	6470	Homo sapiens serine hydroxymethyltransferase 1 (soluble) (SHMT1), transcript variant 1, mRNA.	GO:0006544|GO:0006563|GO:0006544|GO:0006563|GO:0006730|GO:0006544|GO:0006565|GO:0006730|GO:0009113|GO:0046655|GO:0051262	GO:0005737|GO:0005739|GO:0005829|GO:0005829|GO:0005829	GO:0003824|GO:0004372|GO:0030170|GO:0004372|GO:0016740|GO:0030170|GO:0004372|GO:0004372|GO:0004372|GO:0004372|GO:0016740|GO:0030170|GO:0042803	chr17	18231380	18231429	CCAGGCTTTCCTGCTCCACCTGAGATAACCAACTCCCTCCCGTAATCAGG
LOC647000	3310288	0.0147912	up	1.32619	-0.445682	-0.0383933	647000	PREDICTED: Homo sapiens similar to tubulin, beta 5 (LOC647000), mRNA.				chr13	40856171	40856220	TCCTTTCCAACTCTACCTCCCTCACTCGAGCTCCTTTCCCCTGATCAGAG
KLHL29	4590327	0.039061	up	1.32632	-0.6193	-0.211872	114818	PREDICTED: Homo sapiens kelch-like 29 (Drosophila) (KLHL29), mRNA.			GO:0005515				AGCATTGGTGTGCGTCTGCCTCCAAAGGAGGTTCTAGTTGTCAGCGAGAC
DUSP5	5390161	0.0250632	up	1.32734	-1.88695	-1.47841	1847	Homo sapiens dual specificity phosphatase 5 (DUSP5), mRNA.	GO:0006470	GO:0005634	GO:0004725|GO:0016787|GO:0017017	chr10	112260431	112260480	CTCCCTGCCCCTGGAGGTTGTCTTCAAGCTGTGGACTTCTGGGATTTGCA
SPARCL1	1030021	0.0460767	up	1.32738	5.66727	6.07585	8404	Homo sapiens SPARC-like 1 (mast9, hevin) (SPARCL1), mRNA.		GO:0005576|GO:0005578	GO:0005509	chr4	88619687	88619736	ACTTGCTCCTCTGCGAGCATCTCTGGTGCCCATGGAACACTGCATAACCC
CENPI	6250451	0.0207603	up	1.32808	-0.201216	0.208131	2491	Homo sapiens centromere protein I (CENPI), mRNA.	GO:0007548	GO:0000775|GO:0005634|GO:0005694		chrX	100287847	100287896	CTCCTGGGATCTTCTATTCTGCACTCCTCAGCCTGGATACCAGCATCCTG
HPCAL1	520184	0.039372	up	1.32825	-0.0440362	0.365487	3241	Homo sapiens hippocalcin-like 1 (HPCAL1), transcript variant 2, mRNA.			GO:0005509	chr2	10484818	10484867	TGCATGTGTGCCCTGAGCCGTGATGATCCTCCCATCCGTGTTGTGAGCAC
NRG1	240093	0.0300842	up	1.32873	1.05668	1.46673	3084	Homo sapiens neuregulin 1 (NRG1), transcript variant SMDF, mRNA.	GO:0009790|GO:0009790|GO:0006916|GO:0007154|GO:0007169|GO:0007171|GO:0007219|GO:0007399|GO:0008283|GO:0009790|GO:0014032|GO:0016481|GO:0030307|GO:0030879|GO:0042060|GO:0042060|GO:0043496|GO:0043497|GO:0043624|GO:0045785|GO:0051048|GO:0051155|GO:0055007|GO:0055012|GO:0060045|GO:0007399|GO:0030307	GO:0005576|GO:0005576|GO:0005576|GO:0005615|GO:0005615|GO:0005634|GO:0005886|GO:0016021|GO:0016324|GO:0016020|GO:0016021	GO:0005102|GO:0005102|GO:0003712|GO:0008083|GO:0008083|GO:0030296|GO:0030297|GO:0030297|GO:0030297|GO:0030971|GO:0030971|GO:0043125|GO:0043125|GO:0003674|GO:0005125|GO:0008083	chr8	32625352	32625401	CCTTCACCCACCCGGAACCCTGAGGTGAGAACGCCCAAGTCAGCAACTCA
MIAT	430438	0.0303439	up	1.32951	4.96859	5.37948	440823	Homo sapiens myocardial infarction associated transcript (non-protein coding) (MIAT), non-coding RNA.				chr22	25401941	25401990	CTGAGCCCAAGCAGGCACATTCTCTTCGACCCCTCCCTCATTCAGTCTGC
ZDHHC16	5700296	0.0119357	up	1.32987	-0.108444	0.302842	84287	Homo sapiens zinc finger, DHHC-type containing 16 (ZDHHC16), transcript variant 4, mRNA.	GO:0006915	GO:0005783|GO:0005789|GO:0016020|GO:0016021	GO:0008270|GO:0008415|GO:0016740|GO:0046872|GO:0008270|GO:0046872|GO:0008270|GO:0046872|GO:0008270|GO:0046872|GO:0008270|GO:0046872	chr10	99206857	99206906	AGGCCTGCTGCTGAGGTCACTGCCACTTCTCACATGCTGCTTAAGGGAGC
BUB1B	1090047	0.0176147	up	1.3299	-0.0287094	0.38261	701	Homo sapiens BUB1 budding uninhibited by benzimidazoles 1 homolog beta (yeast) (BUB1B), mRNA.	GO:0006915|GO:0007051|GO:0007067|GO:0007093|GO:0008283|GO:0031145|GO:0045786|GO:0048015|GO:0051301|GO:0051436	GO:0000940|GO:0005634|GO:0005680|GO:0005737|GO:0005829|GO:0005829|GO:0005829|GO:0051233	GO:0000166|GO:0004674|GO:0005515|GO:0005524|GO:0016740	chr15	38300136	38300185	GGGGAGCTTGCAGCAGAAATGAATGGGGTTTTTGACACTACATTCCAAAG
NOMO1	3310056	0.035443	up	1.33093	-1.36603	-0.953594	23420	Homo sapiens NODAL modulator 1 (NOMO1), mRNA.	GO:0008150	GO:0005575|GO:0016020|GO:0016021	GO:0003674|GO:0005515|GO:0030246	chr16	14888194	14890476	TTCCCCCCACTGCTCAGAGACGGCGAGAACTATGTTGTGCTTCTGGACTC
PLK1	6130215	0.0495193	up	1.3318	-0.223763	0.189616	5347	Homo sapiens polo-like kinase 1 (Drosophila) (PLK1), mRNA.	GO:0006468|GO:0007049|GO:0007067|GO:0008283|GO:0051301|GO:0051437	GO:0005634|GO:0005654|GO:0005654|GO:0005654|GO:0005654|GO:0005654|GO:0005654|GO:0005813|GO:0005829	GO:0000166|GO:0004674|GO:0005515|GO:0005515|GO:0005515|GO:0005515|GO:0005515|GO:0005515|GO:0005515|GO:0005524|GO:0016740	chr16	23609074	23609123	TACAGCCTTGTCCCCCTCCCCCTCAACCCCACCATATGAATTGTACAGAA
PKMYT1	2510678	0.0272313	up	1.33219	-0.34028	0.0735205	9088	Homo sapiens protein kinase, membrane associated tyrosine/threonine 1 (PKMYT1), transcript variant 2, mRNA.	GO:0000079|GO:0006468|GO:0007049|GO:0007088|GO:0006468	GO:0000139|GO:0005624|GO:0005654|GO:0005783|GO:0005789|GO:0005794|GO:0016020	GO:0000166|GO:0004674|GO:0005515|GO:0005524|GO:0016740|GO:0000166|GO:0004674|GO:0005524|GO:0016740	chr16	3024383	3024564	CTGAGTTCACTGCCGGTCTGTCTTCCGAGCTGCGTTCTGTCCTTGTCATG
SDHALP1	7160128	0.0348884	up	1.33267	0.196593	0.610911	255812	Homo sapiens succinate dehydrogenase complex, subunit A, flavoprotein pseudogene 1 (SDHALP1) on chromosome 3.							CCGATCTGCCGTCATTTACAGTCCCCTGTTGCGCATGTAGATCATTTTTG
RIPK1	5560086	0.0374693	up	1.33311	-1.33158	-0.916783	8737	Homo sapiens receptor (TNFRSF)-interacting serine-threonine kinase 1 (RIPK1), mRNA.	GO:0006468|GO:0006915|GO:0007165|GO:0008633|GO:0043123	GO:0005737|GO:0005829|GO:0005829|GO:0005829|GO:0005829	GO:0000166|GO:0004674|GO:0004713|GO:0005515|GO:0005524|GO:0016740	chr6	3060184	3060233	TGTCCGGTTACTACTTGGCCACCACGCAGCCTTGGCTCCTACAGCCCAAA
TMEM194	1110494	0.0143461	up	1.33328	0.853436	1.26841	23306	Homo sapiens transmembrane protein 194 (TMEM194), mRNA.				chr12	55736162	55736211	GCCAACACCAACTCGTAGCTTTAGTGGCAGATGGGAGTGGTCACAGACTC
KIF11	1110022	0.0347326	up	1.33372	-0.337949	0.0775051	3832	Homo sapiens kinesin family member 11 (KIF11), mRNA.	GO:0007018|GO:0007049|GO:0007052|GO:0007067|GO:0007100|GO:0051300|GO:0051301	GO:0000922|GO:0005634|GO:0005737|GO:0005871|GO:0005876	GO:0000166|GO:0003777|GO:0005524	chr10	94404779	94404828	CCCTTAGGACTCTGGTATTTTTGATCTGGCAACCATATTTCTGGAAGTTG
STIM2	3840386	0.0359274	up	1.33497	1.2382	1.65501	57620	Homo sapiens stromal interaction molecule 2 (STIM2), mRNA.	GO:0006811|GO:0006816|GO:0032235	GO:0005783|GO:0005789|GO:0016020|GO:0016021|GO:0030176	GO:0005509|GO:0005515	chr4	26635758	26635807	GAGTGGAGGAGGCTGGCCAAAGAGACTGTGGGCTGTTTTCAGTCAGGGAG
SYNJ2	4200593	0.0158977	up	1.33513	-2.19378	-1.7768	8871	Homo sapiens synaptojanin 2 (SYNJ2), mRNA.		GO:0016020	GO:0003723|GO:0004437|GO:0004439|GO:0016787	chr6	158438833	158438882	GAGTTTGGGGGAGAGAGCAAGATGGGTTCCTTGGAGAAGCTGATTTGCCA
PRPS2	130619	0.0224601	up	1.33518	-1.26951	-0.852479	5634	Homo sapiens phosphoribosyl pyrophosphate synthetase 2 (PRPS2), transcript variant 1, mRNA.	GO:0009116|GO:0009156|GO:0009165|GO:0044249|GO:0006139|GO:0009116|GO:0009156|GO:0009165|GO:0044249		GO:0000287|GO:0004749|GO:0016301|GO:0000287|GO:0004749|GO:0016301|GO:0016740	chrX	12751996	12752045	CTGAATGGGGGTGGACCTGGCATTTATCTGGCCAAAAACAGGAGCCAGAG
ENDOD1	2510039	0.0316536	up	1.33544	-1.0459	-0.62859	23052	Homo sapiens endonuclease domain containing 1 (ENDOD1), mRNA.		GO:0005576	GO:0003676|GO:0004519|GO:0016787	chr11	94504928	94504977	CTTGCTGTGGCTCTGTTATGTTCTGAGGCCTTGGGATTAGCCTCTTCCTC
BNC2	7050010	0.00768846	up	1.33561	-3.02597	-2.60848	54796	Homo sapiens basonuclin 2 (BNC2), mRNA.	GO:0006350|GO:0006355	GO:0005622|GO:0005634|GO:0005622|GO:0005622|GO:0005622|GO:0005622|GO:0005634|GO:0005622	GO:0003677|GO:0008270|GO:0046872|GO:0008270|GO:0008270|GO:0008270|GO:0003677|GO:0008270|GO:0008270	chr9	16419475	16419524	TGTCTAGGAGCTTTATCTTTTCACCTCCTTCAGAGGATGCTATGGGGTCC
ARMC6	2060128	0.0489844	up	1.3369	-0.254305	0.164591	93436	Homo sapiens armadillo repeat containing 6 (ARMC6), mRNA.			GO:0005515	chr19	19029665	19029714	GCACGGATGTTACTGTCCTGCTCCTTCCCCCAGCCCCACGCCCTACCAGA
CDK10	5810220	0.0386366	up	1.33749	0.444371	0.863897	8558	Homo sapiens cyclin-dependent kinase (CDC2-like) 10 (CDK10), transcript variant 3, mRNA.	GO:0006468|GO:0006468|GO:0051301|GO:0006468|GO:0007089|GO:0008285		GO:0000166|GO:0004674|GO:0005524|GO:0016740|GO:0004672|GO:0004693|GO:0005524|GO:0016301|GO:0000166|GO:0004693|GO:0005515|GO:0005524|GO:0016740	chr16	88287254	88287303	AGGCCCTGTCCCTAGATGGCACTTGGTGACACACACTCCCCTCTCTGCTG
ANXA5	1070451	0.0304724	up	1.33769	-1.56772	-1.14798	308	Homo sapiens annexin A5 (ANXA5), mRNA.	GO:0050819|GO:0006916|GO:0007165|GO:0007596|GO:0050819	GO:0005622|GO:0005737	GO:0005509|GO:0005544|GO:0004859|GO:0005509|GO:0005515|GO:0005544	chr4	122808996	122809045	GTGCCTGCACCACCCCACTGCCTTCCTTCAGCACCTTTAGCTGCATTTGT
ZDHHC13	650324	0.0340977	up	1.33827	-0.0805332	0.339831	54503	Homo sapiens zinc finger, DHHC-type containing 13 (ZDHHC13), transcript variant 2, mRNA.	GO:0043123	GO:0016020|GO:0016021	GO:0004871|GO:0008270|GO:0008415|GO:0016740|GO:0046872	chr11	19150847	19150896	GTGTGGCTGCTTTGGCTTGGTGAAGCCCTGTGTGGTAGATTGGACATCAC
C20orf55	4070201	0.0368197	up	1.33835	-0.324282	0.0961782	83541	Homo sapiens chromosome 20 open reading frame 55 (C20orf55), transcript variant 1, mRNA.				chr20	774757	774806	CCTTTGCTGACTTCCTCTTCCTTACCCAGCAGAACTCACCCTGGGGTCGG
GINS3	3060192	0.0188671	up	1.33876	0.376796	0.797694	64785	Homo sapiens GINS complex subunit 3 (Psf3 homolog) (GINS3), mRNA.	GO:0006260	GO:0005634		chr16	56997199	56997248	GGCCCATTAGACTGTTTGCAGGGCATCACTGCTTCCCCCTGACACCTCAC
PCOLCE2	4810445	0.0247826	up	1.33932	-4.44709	-4.02559	26577	Homo sapiens procollagen C-endopeptidase enhancer 2 (PCOLCE2), mRNA.		GO:0005576	GO:0005515|GO:0005524|GO:0008201|GO:0016887	chr3	144019624	144019673	CAGAGGAGCAGCTATCTGATTGGAAACCTGCCGACTTAGTGCGGTGATAG
NEBL	380561	0.0350814	up	1.34022	2.84427	3.26674	10529	Homo sapiens nebulette (NEBL), transcript variant 1, mRNA.	GO:0030832		GO:0003779|GO:0008307	chr10	21110350	21110399	GAATTGCTGAGCATTTAGGAAGCAGCACCAAGTCTATTACAGGCATGGTG
LOC100132247	6060014	0.0236534	up	1.34068	0.203623	0.626589	100132247	Homo sapiens similar to Uncharacterized protein KIAA0220 (LOC100132247), mRNA.				chr16	22545845	22545894	CTTCCGAGCGTCAGCTCACTGCCCTTCCACCCTCAGCAGATGATAATATC
USP32	5290369	0.0427119	up	1.34075	-0.226641	0.196395	84669	Homo sapiens ubiquitin specific peptidase 32 (USP32), mRNA.	GO:0006511|GO:0006511	GO:0016020	GO:0004221|GO:0005509|GO:0008233|GO:0008234|GO:0004221|GO:0005509	chr17	58300910	58303411	ACTGCTGGCAGCGGCTTTCTGTATTCTGCCACACCAGGGGCAGATGTTTG
WTIP	1230270	0.0224334	up	1.34248	-1.01593	-0.591027	126374	PREDICTED: Homo sapiens Wilms tumor 1 interacting protein (WTIP), mRNA.	GO:0006350|GO:0006355	GO:0005634|GO:0030054	GO:0008270|GO:0046872	chr19	39683802	39683851	TGTGTCTGCGCGCGGGGCAAGGGGCTCCACGACAAAAGGACAAGATTTGA
MCM5	7330253	0.0212962	up	1.34279	-0.156313	0.268926	4174	Homo sapiens minichromosome maintenance complex component 5 (MCM5), mRNA.	GO:0006270|GO:0006270|GO:0051301|GO:0006260|GO:0006260|GO:0006270|GO:0006350|GO:0006355	GO:0005634|GO:0005634|GO:0005634|GO:0005654|GO:0005654|GO:0005654|GO:0005654|GO:0005654|GO:0005654|GO:0005654	GO:0003677|GO:0005524|GO:0000166|GO:0003677|GO:0005524|GO:0000166|GO:0003677|GO:0005524|GO:0000166|GO:0003677|GO:0005515|GO:0005515|GO:0005515|GO:0005524	chr22	34149319	34150180	GGACTTCACCAAGCAGAAATACCCGGAGCACGCCATCCACAAGGTGCTGC
C11orf87	7510619	0.0296975	up	1.34316	-2.18057	-1.75493	399947	Homo sapiens chromosome 11 open reading frame 87 (C11orf87), mRNA.				chr11	108801432	108801481	CTGGATGAGAAATTCAGTGGTGCAGACCTGGCTTCTGCTGTTTCCAGAAG
CCDC18	6770541	0.0290122	up	1.34337	-0.17225	0.253606	343099	Homo sapiens coiled-coil domain containing 18 (CCDC18), mRNA.				chr1	93494530	93494579	AGATTTGGGGCAAGAATTGAGGCTGACCCGGGAGCAGGTGCAGAACTCTC
LOC100133923	3060187	0.0485184	up	1.34373	0.572937	0.999178	100133923	PREDICTED: Homo sapiens hypothetical protein LOC100133923 (LOC100133923), mRNA.							AAAGGATGGACAAATACGTGGGACAGTGTCTCCTCAGAAACAATCGGCCC
ELOVL6	7380181	0.0153898	up	1.34427	0.462457	0.88928	79071	Homo sapiens ELOVL family member 6, elongation of long chain fatty acids (FEN1/Elo2, SUR4/Elo3-like, yeast) (ELOVL6), mRNA.	GO:0030497	GO:0005739|GO:0005783|GO:0005789|GO:0016020|GO:0016021|GO:0030176	GO:0016747	chr4	111190720	111190769	CCCCAAGCAATGTAGAGGTGTTTAAAGGGCCCTCTGCTGGCTGAGTGGCA
RACGAP1	2190010	0.0131217	up	1.34603	-0.263464	0.165245	29127	Homo sapiens Rac GTPase activating protein 1 (RACGAP1), mRNA.	GO:0000910|GO:0000915|GO:0006811|GO:0007049|GO:0007108|GO:0007242|GO:0007283|GO:0007405|GO:0008272|GO:0009790|GO:0030154	GO:0001669|GO:0005622|GO:0005634|GO:0005737|GO:0005819|GO:0005874	GO:0005096|GO:0008022|GO:0008270|GO:0019992|GO:0043014|GO:0043015|GO:0046872|GO:0048487	chr12	48669516	48669565	CTTGGCCCCCATACCCCCAACCTTGTCCAGTGGAGCCCAACTTCTAAAGG
DEPDC1B	7330338	0.0489297	up	1.34667	0.777379	1.20677	55789	Homo sapiens DEP domain containing 1B (DEPDC1B), mRNA.	GO:0007242	GO:0005622	GO:0005096	chr5	59935142	59937313	AGATGCCACCCCTGTGTGATGGCTTTGGTACCCGAACACTGATGGTTCAG
COL27A1	2120181	0.0100092	up	1.34685	0.56452	0.994108	85301	Homo sapiens collagen, type XXVII, alpha 1 (COL27A1), mRNA.	GO:0007155|GO:0007155|GO:0007155	GO:0005576|GO:0005581|GO:0005581|GO:0005581	GO:0005201|GO:0005201|GO:0005198|GO:0005201	chr9	116111410	116111459	GCTCCGAGGTGACCCAGCACATCACCATCCACTGCCTTAACATGACCGTG
SRPX	4900133	0.0278124	up	1.34794	-5.72502	-5.29426	8406	Homo sapiens sushi-repeat-containing protein, X-linked (SRPX), mRNA.	GO:0007155	GO:0009986|GO:0016020	GO:0005515	chrX	38008942	38008991	CCGAAATGAGCCAGACCTGTAACACCTGACATGATGGTTCCTCTCTTGGC
CENPO	4560682	0.0104814	up	1.34908	0.0356998	0.467677	79172	Homo sapiens centromere protein O (CENPO), mRNA.		GO:0000775|GO:0005634|GO:0005694		chr2	24893146	24894047	CTGTATAAGGACCTCACAGCAACTCTTCCCACTGACGTCACCGTGACATG
LOC389332	6370008	0.0106309	up	1.34988	0.251847	0.684676	389332	Homo sapiens hypothetical LOC389332 (LOC389332), non-coding RNA.				chr5	135527231	135527280	TAAGGACCCAGTTTCTTCTGTGAGCACGGGCAGTGGGAGGCCGGTGGAAA
CAMK2A	4850170	0.0323483	up	1.35097	0.875303	1.3093	815	Homo sapiens calcium/calmodulin-dependent protein kinase (CaM kinase) II alpha (CAMK2A), transcript variant 2, mRNA.	GO:0006468|GO:0051092|GO:0006468	GO:0005886|GO:0030054|GO:0045202|GO:0005954	GO:0000166|GO:0004683|GO:0005516|GO:0005524|GO:0016740|GO:0000166|GO:0004683|GO:0005524|GO:0016740	chr5	149579515	149579564	CAGGAAAGTGTTCTCCTGGGTTTGTGCCCACCATGGTGCGAATCCTGACC
SLCO3A1	1440348	0.0424346	up	1.35196	1.81424	2.2493	28232	PREDICTED: Homo sapiens solute carrier organic anion transporter family, member 3A1, transcript variant 2 (SLCO3A1), mRNA.	GO:0006811	GO:0016020|GO:0016021	GO:0005215				GAGTAGGCATCTTTCCTGGGTCTCTAAAGAGTCATGCTGACCTGGTGTGC
LOC100128100	7040364	0.0407686	up	1.35209	0.945685	1.38088	100128100	PREDICTED: Homo sapiens hypothetical protein LOC100128100 (LOC100128100), mRNA.				chr16	31943375	31943424	GAGCGCCAGAGACTTGTGTGTGGGCCACGTACATGTGGACAGAGACGCAT
NCAPD2	2680497	0.0147912	up	1.35276	-0.450975	-0.0150674	9918	Homo sapiens non-SMC condensin I complex, subunit D2 (NCAPD2), mRNA.	GO:0007049|GO:0007067|GO:0007076|GO:0051301	GO:0000793|GO:0000797|GO:0005634|GO:0005737	GO:0005488|GO:0042393	chr12	6510846	6510895	GATCCTAGGAAGTCTGTTCCTGTCCTCCCTGTGCAGGGTATCCTGTAGGG
ARHGAP8	60551	0.039061	up	1.35331	0.366974	0.803468	23779	Homo sapiens Rho GTPase activating protein 8 (ARHGAP8), transcript variant 2, mRNA.	GO:0007165|GO:0007165|GO:0007165|GO:0007165|GO:0007165|GO:0007165|GO:0007165	GO:0005622|GO:0005622|GO:0005622|GO:0005622|GO:0005622|GO:0005622|GO:0005622	GO:0005096	chr22	43561033	43561082	GTGCTGGGTGCAGTGAGGAAGAGGCCCTCGGTGGTGCCCATGGCTGGCCA
PHACTR3	4060259	0.0121768	up	1.35399	-0.080328	0.356886	116154	Homo sapiens phosphatase and actin regulator 3 (PHACTR3), transcript variant 3, mRNA.		GO:0005634|GO:0016363	GO:0003779|GO:0004864	chr20	57814637	57844996	CTTTCCAAACGGCTGAGCCAAAGACCTGCCGTGGAAGAGCTGGAGAGAAG
RBM20	6020671	0.00872836	up	1.35435	2.25753	2.69513	282996	PREDICTED: Homo sapiens RNA binding motif protein 20 (RBM20), mRNA.		GO:0005622	GO:0003723|GO:0008270				CTGATGGTGTGAGCAGCAGCCGTTAGTATCAGGGTTTCCCATTCTTGGAC
FGFR1	6450471	0.0192748	up	1.35654	0.13369	0.573618	2260	Homo sapiens fibroblast growth factor receptor 1 (FGFR1), transcript variant 5, mRNA.	GO:0000165|GO:0001501|GO:0006468|GO:0006468|GO:0008543|GO:0008543|GO:0016049	GO:0005624|GO:0005886|GO:0005886|GO:0005886|GO:0005887	GO:0000166|GO:0004872|GO:0005007|GO:0005007|GO:0005007|GO:0005515|GO:0005515|GO:0005524|GO:0008201|GO:0016740	chr8	38401239	38401288	TAAGGTGTACAGTGACCCGCAGCCGCACATCCAGTGGCTAAAGCACATCG
MYLIP	4830424	0.0153913	up	1.35769	-0.545727	-0.104575	29116	Homo sapiens myosin regulatory light chain interacting protein (MYLIP), mRNA.	GO:0006511|GO:0006928|GO:0007399|GO:0016567	GO:0005622|GO:0005737|GO:0005856|GO:0019898	GO:0004842|GO:0008092|GO:0008270|GO:0016874|GO:0046872	chr6	16148112	16148161	GCATTTTGGAAGCTGGTCAGCTAGCAGGTTTTCTGGGATGTCGGGAGACC
TNFRSF10B	2600463	0.0462961	up	1.3588	-0.171391	0.27094	8795	Homo sapiens tumor necrosis factor receptor superfamily, member 10b (TNFRSF10B), transcript variant 1, mRNA.	GO:0006919|GO:0007166|GO:0007250|GO:0007250|GO:0008625|GO:0008633|GO:0042981|GO:0043123	GO:0005886|GO:0005886|GO:0016021	GO:0004872|GO:0008656|GO:0045569	chr8	22933755	22933804	TTAGGCTTTGCTATATCCCCAGGCCAAATAGCATGTGACACAGGACAGCC
STARD13	3440184	0.0230889	up	1.35934	-0.509219	-0.0663085	90627	Homo sapiens START domain containing 13 (STARD13), transcript variant delta, mRNA.	GO:0007165|GO:0045786	GO:0005622|GO:0005737|GO:0005739|GO:0005811|GO:0016020|GO:0031966|GO:0034430	GO:0005096|GO:0005515	chr13	32610677	32610726	GGATGCGTTGCCTTTTGCAGCTGTGGATTCGTGTGGGTTCCTGTTTCCAG
NUF2	2000458	0.0267093	up	1.35944	0.0222424	0.465256	83540	Homo sapiens NUF2, NDC80 kinetochore complex component, homolog (S. cerevisiae) (NUF2), transcript variant 2, mRNA.	GO:0007049|GO:0007059|GO:0007067|GO:0051301|GO:0007067|GO:0007067	GO:0000775|GO:0000777|GO:0005634|GO:0000775|GO:0000775	GO:0003674|GO:0005515|GO:0005515|GO:0005515	chr1	161591771	161591820	CTGCTTTGGAGAAATACCACGACGGTATTGAAAAGGCAGCAGAGGACTCC
TUBA1C	6100673	0.0211462	up	1.36033	-2.59338	-2.14943	84790	Homo sapiens tubulin, alpha 1c (TUBA1C), mRNA.	GO:0007018|GO:0051258|GO:0007018|GO:0051258	GO:0005874|GO:0043234|GO:0005874|GO:0043234	GO:0000166|GO:0003924|GO:0005198|GO:0005515|GO:0005525|GO:0000166|GO:0003924|GO:0005198|GO:0005525	chr12	47953213	47953262	AGAAGGATTATGAGGAGGTTGGAGCAGATAGTGCTGACGGAGAGGATGAG
WNT5B	4850370	0.0160547	up	1.36038	-3.78691	-3.34289	81029	Homo sapiens wingless-type MMTV integration site family, member 5B (WNT5B), transcript variant 1, mRNA.	GO:0007223|GO:0007275	GO:0005576|GO:0005578	GO:0004871|GO:0005515	chr12	1626322	1626371	TCTTCATCCTCCACGGTTCACTAGCTCCTACCTGAAGAGGAAAGGGGGCC
DLK2	1070279	0.030362	up	1.36071	1.91508	2.35945	65989	Homo sapiens delta-like 2 homolog (Drosophila) (DLK2), transcript variant 2, mRNA.		GO:0016020|GO:0016021	GO:0005509	chr6	43526154	43526203	CTGGAGTGGTCCGTTCTCACCACCCTTCAGCTTGGGTACACACACAGAGG
TARDBP	2570139	0.0368235	up	1.36103	0.739451	1.18415	23435	Homo sapiens TAR DNA binding protein (TARDBP), mRNA.	GO:0006350|GO:0006355|GO:0006366|GO:0006397|GO:0007067|GO:0008380	GO:0005634	GO:0000166|GO:0003676|GO:0000166|GO:0003700|GO:0003700|GO:0003723|GO:0005515|GO:0008017	chr1	11007805	11007854	TCGGGGACCTCCAAAGACTAAACTGACAAGCCTTCAAGGAGCCCAGGGGT
LOC646347	7510209	0.0153913	up	1.36108	0.172964	0.617715	646347	PREDICTED: Homo sapiens misc_RNA (LOC646347), miscRNA.				chr1	159132353	159132402	CTGAAAGAAGCACTGTCGCTCTATGAAGAACAGCTGGGGCGCCTGTATTG
SLC12A5	270301	0.0326803	up	1.36294	0.72009	1.16681	57468	Homo sapiens solute carrier family 12, (potassium-chloride transporter) member 5 (SLC12A5), mRNA.	GO:0006811|GO:0006813|GO:0006814|GO:0006821|GO:0006873	GO:0016020|GO:0016021	GO:0005215|GO:0015293|GO:0015379|GO:0030955	chr20	44121592	44121641	GGGGGCTGTATCAACATCAATTAGGGAACCAAAGTTGCACTATCTGGGCC
CDCA7	2070520	0.00794934	up	1.36311	1.95164	2.39854	83879	Homo sapiens cell division cycle associated 7 (CDCA7), transcript variant 1, mRNA.	GO:0006350|GO:0006355|GO:0042127	GO:0005634		chr2	173941629	173941678	CTCTGCCAGTCTAGTTTCTGGGCAGGTTTCCTGTGTCAGTATTCCCCCTC
TOMM40	1740494	0.0296975	up	1.36367	0.747117	1.19461	10452	Homo sapiens translocase of outer mitochondrial membrane 40 homolog (yeast) (TOMM40), nuclear gene encoding mitochondrial protein, mRNA.	GO:0006820|GO:0015031|GO:0043681	GO:0005739|GO:0005741|GO:0016020|GO:0016021|GO:0042719	GO:0003674|GO:0008308	chr19	50098656	50098705	GTCAGTCCACCCTGCCCCGTCCACTTTCCCATCTCCTCGGTATAAATCAT
ARCN1	2750653	0.0139183	up	1.36369	-0.898323	-0.450812	372	Homo sapiens archain 1 (ARCN1), mRNA.	GO:0006810|GO:0006886|GO:0006890|GO:0016044|GO:0016192|GO:0048205	GO:0000139|GO:0005737|GO:0005794|GO:0005829|GO:0005829|GO:0016020|GO:0030126|GO:0030131|GO:0031410	GO:0005515	chr11	117978384	117978433	GCTGGTTGAAAAGTACCACTCCCACTCTGAACATCTGGCCGTCCCTGCAA
SPNS2	5910201	0.045903	up	1.36371	0.188353	0.635891	124976	PREDICTED: Homo sapiens spinster homolog 2 (Drosophila) (SPNS2), mRNA.	GO:0006810	GO:0016020|GO:0016021	GO:0005215				CAGTGGTGTGTAAGCAGGTGGAATACTCACCCACCAAGCTCTGGGGTACC
LOC151162	1440437	0.0492723	up	1.36402	1.94827	2.39614	151162	Homo sapiens hypothetical LOC151162 (LOC151162), non-coding RNA.				chr2	135212071	135212120	TCTGCAAACAAGGTGTCGCCGTCCAAATGTACTGTCCTGGCATAGAGAGC
MED8	7330546	0.0107609	up	1.36472	-0.793835	-0.345231	112950	Homo sapiens mediator of RNA polymerase II transcription, subunit 8 homolog (S. cerevisiae) (MED8), transcript variant 1, mRNA.	GO:0006350|GO:0006355|GO:0006511	GO:0000119|GO:0005634		chr1	43622817	43622866	TGTGCTGCCAGAAACTGTAGCAACCTCTGTGTTCTTAGAGGCACACTGTT
MLF1IP	2120678	0.0458318	up	1.36487	-0.116938	0.331822	79682	Homo sapiens MLF1 interacting protein (MLF1IP), mRNA.	GO:0006350|GO:0006355|GO:0044419	GO:0000775|GO:0000777|GO:0005634|GO:0005694|GO:0005737		chr4	185852388	185852437	CAGTTCTGTGCACATACTTTTCAATACTCCCCGACGGAAGAGCAAGGGTG
LAMB1	2630746	0.0233424	up	1.36506	-4.06669	-3.61773	3912	Homo sapiens laminin, beta 1 (LAMB1), mRNA.	GO:0007155|GO:0030335|GO:0031175|GO:0042476|GO:0050679	GO:0005578|GO:0005576|GO:0005604|GO:0005604|GO:0005606|GO:0005607|GO:0005607|GO:0005737|GO:0005856|GO:0043257|GO:0043257|GO:0043259|GO:0048471	GO:0005201|GO:0005515	chr7	107353919	107353968	GAATGTGGAAGAACTTAAGCGGAAAGCTGCCCAAAACTCCGGGGAGGCAG
SNTG1	5360370	0.0104668	up	1.36549	0.463776	0.913191	54212	Homo sapiens syntrophin, gamma 1 (SNTG1), mRNA.	GO:0007154	GO:0005634|GO:0005737|GO:0005856|GO:0016013	GO:0003779|GO:0005515	chr8	51525816	51569491	TTAGGCAATCAAGCTACTGCTTCTACTGCTGCCAGCTCTGCTACCACGAG
ARF1	3310139	0.0284447	up	1.36606	-0.495139	-0.0451164	375	Homo sapiens ADP-ribosylation factor 1 (ARF1), transcript variant 1, mRNA.	GO:0006890|GO:0007264|GO:0015031|GO:0016044|GO:0016192|GO:0048205	GO:0000139|GO:0000139|GO:0000139|GO:0005622|GO:0005794|GO:0005829|GO:0005829|GO:0005886|GO:0030017	GO:0000166|GO:0003924|GO:0005057|GO:0005515|GO:0005515|GO:0005515|GO:0005515|GO:0005525	chr1	226353219	226353268	TAGACCCACAGCCCCTCGGGAGCACCCCACCTCTGTGTGTGATGTAGCTT
CLCN6	3850136	0.049025	up	1.36654	1.30306	1.75359	1185	Homo sapiens chloride channel 6 (CLCN6), transcript variant ClC-6a, mRNA.	GO:0006821|GO:0006811|GO:0006821|GO:0006821|GO:0006884|GO:0006884|GO:0007165|GO:0007165	GO:0016020|GO:0016020|GO:0016021|GO:0016021	GO:0005247|GO:0005244|GO:0005247|GO:0005247|GO:0031404	chr1	11825352	11825401	GCCCTGGCTTTGGGACCTTGTGCTGAGGGATGATTTGCTCCTGACCTTGA
CDCA2	2940398	0.0170447	up	1.3666	-0.352562	0.0980269	157313	Homo sapiens cell division cycle associated 2 (CDCA2), mRNA.	GO:0007049|GO:0007067|GO:0051301	GO:0005634		chr8	25365022	25365071	AAAACCGCAGATGGCACCTCCCGTCTCAGATCCAGAAAACAGCCAGGGCC
PKP4	5890440	0.0388025	up	1.36677	-0.462996	-0.0122232	8502	Homo sapiens plakophilin 4 (PKP4), transcript variant 1, mRNA.	GO:0007155	GO:0005911	GO:0005198|GO:0005515|GO:0005488	chr2	159246044	159246093	CCACACATAGTGTACTTTGGAAGCACAACGTCCAGGCTGGTACCGCAGCG
SLC37A1	2140463	0.0213076	up	1.36724	0.881996	1.33326	54020	Homo sapiens solute carrier family 37 (glycerol-3-phosphate transporter), member 1 (SLC37A1), mRNA.	GO:0008643	GO:0016020|GO:0016021	GO:0005215|GO:0005351	chr21	42874291	42874340	CTGTTCAGCTCAGGCACAGGGGCACAGCAGAGGTTTGGGAAGCGGTCTCC
ENTPD6	7200215	0.0390421	up	1.36784	0.315191	0.767087	955	Homo sapiens ectonucleoside triphosphate diphosphohydrolase 6 (putative function) (ENTPD6), mRNA.		GO:0000139|GO:0005576|GO:0005794|GO:0016020|GO:0016021	GO:0000287|GO:0005509|GO:0016787|GO:0017110|GO:0016787|GO:0016787	chr20	25154923	25154972	CCGGGCATGAGCTGCTGTAAACTATTTGTGGCTGTGCTGCTTGAGTGACG
ANK1	3180209	0.0494429	up	1.36787	-0.0092152	0.442717	286	Homo sapiens ankyrin 1, erythrocytic (ANK1), transcript variant 5, mRNA.	GO:0006887|GO:0007010|GO:0007165|GO:0045199	GO:0005737|GO:0005856|GO:0005886|GO:0016323|GO:0016529	GO:0005200|GO:0008093|GO:0019899|GO:0030507	chr8	41630109	41630158	TGCTAGTAGGAGCCGTTAGGGGAGGAGTTTGGGGTCTCCACACGATGCCT
LOC730092	4200719	0.0343101	up	1.36922	0.973057	1.42641	730092	Homo sapiens RRN3 RNA polymerase I transcription factor homolog (S. cerevisiae) pseudogene (LOC730092) on chromosome 16.							CCAGCAGCTAGCCTACACCCACAGCTATTTTGCTTGTGTTCCACTCGTCC
TNFAIP1	1690681	0.0121768	up	1.37208	0.179211	0.635571	7126	Homo sapiens tumor necrosis factor, alpha-induced protein 1 (endothelial) (TNFAIP1), mRNA.	GO:0006813|GO:0006955|GO:0009790	GO:0005575|GO:0008076|GO:0016020	GO:0003674|GO:0005249|GO:0005515	chr17	23697670	23697719	CAGTGTCTCAGTCTTTTTTGCCGAGAAAGCACAGTAGTCTGGGACTGGGC
MYO19	5910020	0.00768846	up	1.37228	-0.820756	-0.36418	80179	Homo sapiens myosin XIX (MYO19), transcript variant 3, mRNA.		GO:0005737|GO:0016459	GO:0000166|GO:0003774|GO:0003779|GO:0005524	chr17	31943223	31943272	GGCCCCTCTGTGCTACCTCCAAGGAATCAGTCACCTCTGTTCTGCTGAGT
PRKX	1470367	0.0162215	up	1.37234	0.806859	1.2635	5613	Homo sapiens protein kinase, X-linked (PRKX), mRNA.	GO:0006468		GO:0000166|GO:0004674|GO:0004691|GO:0004713|GO:0005524|GO:0016740	chrX	3532679	3532728	ATGTTGCCAACGTGCTTCTGGGGCCCCTGTCACTGCCGCTGGATGCCGCG
SPRY4	4390414	0.0131217	up	1.37574	-0.0329878	0.427219	81848	Homo sapiens sprouty homolog 4 (Drosophila) (SPRY4), mRNA.	GO:0007275|GO:0009966|GO:0043407|GO:0007275|GO:0009966|GO:0043407	GO:0005737|GO:0005886|GO:0042995|GO:0016020	GO:0005515|GO:0005515	chr5	141671786	141671835	CCCAGGGCCCCTCCCTCAAATTGTCTCCATGGGAAACTTGACCCAGTGGC
C15orf23	6270452	0.00794934	up	1.37666	0.297568	0.758742	90417	Homo sapiens chromosome 15 open reading frame 23 (C15orf23), mRNA.				chr15	38470992	38471041	GCGGTGAGACCCTGGCATCACGACAAGAATCCACTACTGATCACATGGAC
TRIP13	5700373	0.0206886	up	1.37699	-0.716971	-0.255457	9319	Homo sapiens thyroid hormone receptor interactor 13 (TRIP13), mRNA.	GO:0006366	GO:0005634	GO:0000166|GO:0003712|GO:0005524|GO:0017111|GO:0042802	chr5	970891	970940	CGGTATGGGCGCCCCTGCATTGCTGGGATGTTTCTGCCCACGGTTTTGTT
C5orf34	770102	0.0272007	up	1.37854	-0.169848	0.293292	375444	Homo sapiens chromosome 5 open reading frame 34 (C5orf34), mRNA.				chr5	43526511	43526560	GCAGGAGACTGACCCAGACTAGTCCCAGAGAGATGCCCACTCATTCGTCA
NDC80	1050470	0.0359274	up	1.37867	-0.538162	-0.074886	10403	Homo sapiens NDC80 homolog, kinetochore complex component (S. cerevisiae) (NDC80), mRNA.	GO:0000070|GO:0007049|GO:0007051|GO:0048015|GO:0051301	GO:0000775|GO:0000777|GO:0005634	GO:0005515|GO:0005515|GO:0005515|GO:0005515	chr18	2598715	2598764	GGAAGCAGAGGAAGAGGATGAAAAATGTGCCAGTGAGCTTGAGTCCTTGG
HNRNPAB	1820398	0.0451451	up	1.37875	-0.475095	-0.0117359	3182	Homo sapiens heterogeneous nuclear ribonucleoprotein A/B (HNRNPAB), transcript variant 1, mRNA.	GO:0001837|GO:0043193	GO:0005634|GO:0005737	GO:0000166|GO:0003700|GO:0003729|GO:0005515|GO:0043565	chr5	177569828	177569877	TACGACTACTCGCCCTATGGCTATTACGGCTACGGCCCCGGCTACGACTA
TOM1L2	7380059	0.0224601	up	1.37982	-0.682613	-0.218131	146691	Homo sapiens target of myb1-like 2 (chicken) (TOM1L2), transcript variant 3, mRNA.	GO:0006886	GO:0005622		chr17	17750452	17750501	TGGCACGCTGCTGAGACGACACTACCAATAAACCAAACTGCCACGCACAC
ZNF783	630017	0.0453322	up	1.38114	0.251016	0.716873	155060	Homo sapiens zinc finger family member 783 (ZNF783), mRNA.	GO:0006350|GO:0006355	GO:0005622|GO:0005634	GO:0003677	chr7	148612800	148612849	TGAAACAAGTCAACCGAAGCTTTGTGGTGCAGGAGCTGAGGGTGCCCCAG
C15orf23	2340528	0.0263414	up	1.38156	0.242806	0.709101	90417	Homo sapiens chromosome 15 open reading frame 23 (C15orf23), mRNA.				chr15	38469412	38471024	GCCTTGATCCAGCTTTAGGCAGTGAGACCCTGGCATCACGACAAGAATCC
C12orf4	6420551	0.0314994	up	1.38219	0.285357	0.752317	57102	Homo sapiens chromosome 12 open reading frame 4 (C12orf4), mRNA.				chr12	4597381	4597430	GTTGAATGCTGCTGCCCAACTCTTCCTTTGTCACCTCTAGGCTATTCCAC
GUCY1A2	7000626	0.0265439	up	1.38258	0.454732	0.922091	2977	Homo sapiens guanylate cyclase 1, soluble, alpha 2 (GUCY1A2), mRNA.	GO:0006182|GO:0007242	GO:0005737	GO:0004383|GO:0020037	chr11	106558258	106558307	CGGCACCATGTTCCTCCGGGAGACAAGCCTCTGAGACCTGCTACAGATCA
PELI2	3840491	0.0498347	up	1.38344	0.242416	0.710678	57161	Homo sapiens pellino homolog 2 (Drosophila) (PELI2), mRNA.			GO:0005515	chr14	55837274	55837323	TGGCTTAGGTTATGATGCGCCTCCTTCTGTGCGACCAATGAGACGACTTC
CD83	5050162	0.0373242	up	1.38354	0.369333	0.837696	9308	Homo sapiens CD83 molecule (CD83), transcript variant 2, mRNA.	GO:0006952|GO:0006959|GO:0007165	GO:0005886|GO:0005887		chr6	14136583	14136632	GCCTTCTGTAGGAATTCTTTTGGGGAAGTGAGGAAGCCAGGTCCACGGTC
WTIP	1170180	0.0154828	up	1.38397	-0.931505	-0.462691	126374	Homo sapiens Wilms tumor 1 interacting protein (WTIP), mRNA.	GO:0006350|GO:0006355	GO:0005634|GO:0030054	GO:0008270|GO:0046872	chr19	34991325	34991374	CTATTTATTCACCGTCTGTGCCTGCTCAAGTCACTTCCCTGCGGGCCCTG
RPL32P3	5960551	0.0376961	up	1.38439	0.472703	0.941953	132241	Homo sapiens ribosomal protein L32 pseudogene 3 (RPL32P3), non-coding RNA.	GO:0006412|GO:0006412	GO:0005622|GO:0005840|GO:0005622|GO:0005840	GO:0003735|GO:0003735	chr3	130585123	130585172	CCCACTGAGAAATCTGTTTCCAAGTTCCTTCAACCTGATGCATCCTGCAG
TSPYL4	610521	0.0397039	up	1.38442	2.06203	2.53131	23270	Homo sapiens TSPY-like 4 (TSPYL4), mRNA.	GO:0006334	GO:0005634		chr6	116678671	116678720	GACCATCCACCATCACCCTTTTCCCCTTTGGTTTTGAAGGCCTTGCCCTA
MRAS	6940215	0.048596	up	1.3848	-1.25072	-0.781036	22808	Homo sapiens muscle RAS oncogene homolog (MRAS), transcript variant 1, mRNA.	GO:0007265|GO:0007275|GO:0007517|GO:0030036	GO:0005622|GO:0005886	GO:0000166|GO:0003924|GO:0005525|GO:0030742	chr3	138123588	138123637	GTGTAGAGTGTGCCCCGTGACATCCCTCCATCTTCTCCTCCATTATCATC
SMS	6020402	0.00949059	up	1.38629	0.257588	0.728822	6611	Homo sapiens spermine synthase (SMS), mRNA.	GO:0006555|GO:0008215		GO:0004766|GO:0016740|GO:0016768	chrX	21920660	21920709	GCACTGTCGCTCTATGAAGAACAGCTGGGGCGCCTGTATTGTCCTGTGGA
SNURF	1050408	0.0414773	up	1.38716	1.21716	1.6893	8926	Homo sapiens SNRPN upstream reading frame (SNURF), transcript variant 1, mRNA.	GO:0008150	GO:0005634	GO:0003674	chr15	22751231	22751280	AGTGGAGCGGCCGCCGGAGATGCCTGACGCATCTGTCTGAGGAGCGGTCA
VCP	2450093	0.045903	up	1.38774	0.43109	0.903832	7415	Homo sapiens valosin-containing protein (VCP), mRNA.	GO:0006919|GO:0006302|GO:0006810|GO:0006919|GO:0016567|GO:0030433|GO:0030968|GO:0030970|GO:0042981|GO:0045184	GO:0005792|GO:0005634|GO:0005634|GO:0005737|GO:0005783|GO:0005792|GO:0005829|GO:0005829	GO:0000166|GO:0005515|GO:0005524|GO:0017111|GO:0000166|GO:0005515|GO:0005515|GO:0005515|GO:0005515|GO:0005515|GO:0005524|GO:0008289|GO:0016787|GO:0016887	chr9	35046719	35046768	ACTTGACTCAATGCTGCCCGAGCCCTCCCTTCCCCCTATCCAACCTGGGT
GGT7	7150537	0.0306527	up	1.38831	1.16222	1.63555	2686	Homo sapiens gamma-glutamyltransferase 7 (GGT7), mRNA.	GO:0006750	GO:0016020|GO:0016021	GO:0003840|GO:0008415|GO:0016740	chr20	33449285	33449334	ACGAAATGAGAGCCACCTAATTGATTTCCGGGAGTCCGCACCAGGGGCCC
LOC158301	780717	0.0458318	up	1.38899	0.669369	1.14341	158301	PREDICTED: Homo sapiens hypothetical protein LOC158301 (LOC158301), mRNA.				chr9	132447529	132447578	CCACCCCTGCAGTCTCAGCTGTTTGGGAGGCTGAAGCAAGAGGCTAGCTT
C13orf37	3170187	0.0212558	up	1.38974	-0.138195	0.336621	440145	Homo sapiens chromosome 13 open reading frame 37 (C13orf37), mRNA.				chr13	73284093	73284142	GTGCACATCTGCTGTGCCAGGTTGAAGTATAGTGGAACCCATCAGTAGTA
CHGA	6200348	0.0284447	up	1.3911	1.69464	2.17087	1113	Homo sapiens chromogranin A (parathyroid secretory protein 1) (CHGA), mRNA.	GO:0008217	GO:0005576	GO:0005509	chr14	92471190	92471239	GCCCCACAACTTTAAACATTGACGATTCCTTCTCTGAACACAGGCAGCTT
SLC29A1	5910424	0.0467822	up	1.39156	-0.304055	0.17265	2030	Homo sapiens solute carrier family 29 (nucleoside transporters), member 1 (SLC29A1), nuclear gene encoding mitochondrial protein, transcript variant 4, mRNA.	GO:0006139|GO:0006810|GO:0015858	GO:0005624|GO:0005887|GO:0016020	GO:0005337|GO:0005515	chr6	44201528	44201577	ACTGATCCCTGCTTGTGCAGGCCAGTGGAGGCTCTTGGGCTTGGAGAACA
HMGN2	3930577	0.00851102	up	1.3918	1.12174	1.59869	3151	Homo sapiens high-mobility group nucleosomal binding domain 2 (HMGN2), mRNA.	GO:0006325|GO:0006355	GO:0000785|GO:0005634|GO:0005737	GO:0003677	chr1	26675352	26675401	TGGTAGATCTGCGGTTTTGGCTGGGTAGCTGACAGGAGCCTCTCTACTTC
C9orf61	2000390	0.0423699	up	1.39288	2.7095	3.18758	9413	Homo sapiens chromosome 9 open reading frame 61 (C9orf61), mRNA.	GO:0008150	GO:0005575	GO:0003674	chr9	71196936	71196985	TAGTTGCCTTTGGCCTTTCACTGCTCTGCGATTTGGCAGGAAATAAGGCG
EPB41L1	3400563	0.0131002	up	1.3929	1.21872	1.69681	2036	Homo sapiens erythrocyte membrane protein band 4.1-like 1 (EPB41L1), transcript variant 1, mRNA.	GO:0030866	GO:0005737|GO:0005856|GO:0019898|GO:0005856|GO:0005737|GO:0005856|GO:0019898|GO:0005856	GO:0003779|GO:0005198|GO:0005488|GO:0003779|GO:0005198|GO:0005488|GO:0008092	chr20	34283711	34283760	CCCCATTCCCCCTCTTGGGCCTCAGTTTCCCGACTTGCAAAATAAGCAGA
TMEM16D	1240609	0.030486	up	1.39307	-0.116599	0.361666	121601	Homo sapiens transmembrane protein 16D (TMEM16D), mRNA.		GO:0016020|GO:0016021		chr12	100045913	100045962	GAGGACTGGCGTTGGAGTCACACTGCTGTGAAATCACGTTGCAGTCCAGC
FBLN1	6040494	0.039061	up	1.39322	-1.03072	-0.552295	2192	Homo sapiens fibulin 1 (FBLN1), transcript variant A, mRNA.	GO:0044419	GO:0005576|GO:0005576|GO:0005737|GO:0005576|GO:0005737|GO:0005576|GO:0005576|GO:0005576|GO:0005576|GO:0005578|GO:0005615|GO:0005625|GO:0005737	GO:0005509|GO:0005509|GO:0005509|GO:0005201|GO:0005509|GO:0005515	chr22	44318029	44321636	CCGTGGGCTTCCGGCTCTCTGTGGATGGCAGGTCATGTGAAGACATCAAT
PGP	4230301	0.0179322	up	1.39352	0.1573	0.636032	283871	Homo sapiens phosphoglycolate phosphatase (PGP), mRNA.	GO:0001501|GO:0005975|GO:0008152|GO:0016331|GO:0030155|GO:0042475|GO:0042981		GO:0008967|GO:0016787	chr16	2262329	2262378	CCTTTCCCTGTACCTGGCAGCTTCTCTCTTGGCCCCACAGTCACAGCACT
CERK	3060692	0.044802	up	1.39367	0.19047	0.669354	64781	Homo sapiens ceramide kinase (CERK), transcript variant 2, mRNA.	GO:0006672|GO:0007205	GO:0000299|GO:0005737|GO:0016020	GO:0000287|GO:0001729|GO:0004143|GO:0005509|GO:0016740|GO:0016301	chr22	45459042	45459091	GGGAAAGTCTGAGTGAAAGGATGGCCTCATTCTCTTTCTAATCTTGCTGG
HBEGF	1820594	0.00764478	up	1.39411	0.680573	1.15992	1839	Homo sapiens heparin-binding EGF-like growth factor (HBEGF), mRNA.	GO:0007165|GO:0007173|GO:0007517|GO:0008016|GO:0035313|GO:0048661|GO:0051549	GO:0005576|GO:0005615|GO:0005886|GO:0005887|GO:0009986	GO:0004872|GO:0005154|GO:0008083|GO:0008201	chr5	139692882	139692931	CTGGTGCTACTCCATGCAGGGGTCAGTGCAGCAGAGGACAGTCTGGAGAA
RNASEH1	1510661	0.0486381	up	1.39415	-0.850095	-0.370713	246243	Homo sapiens ribonuclease H1 (RNASEH1), mRNA.	GO:0006401	GO:0005737|GO:0005739	GO:0000287|GO:0003723|GO:0004519|GO:0004523|GO:0004540|GO:0016787	chr2	3592934	3592983	CCGTCCAGTTGACAGGTTTGAGTCTCCTGCTTGTATAGGTGACTTGTGCC
RERE	10008	0.0278566	up	1.39447	1.11402	1.59374	473	Homo sapiens arginine-glutamic acid dipeptide (RE) repeats (RERE), transcript variant 3, mRNA.	GO:0006338|GO:0006350|GO:0006355|GO:0006607|GO:0007275	GO:0000118|GO:0005634	GO:0003700|GO:0005515|GO:0008267|GO:0008270|GO:0043565|GO:0046872	chr1	8412757	8412806	GCCCTGACCTTCATGGTGTCTTTGAAGCCCAACCACTCGGTTTCCTTCGG
MTHFD2	1300706	0.0370804	up	1.39455	-2.44575	-1.96595	10797	Homo sapiens methylenetetrahydrofolate dehydrogenase (NADP+ dependent) 2, methenyltetrahydrofolate cyclohydrolase (MTHFD2), nuclear gene encoding mitochondrial protein, transcript variant 1, mRNA.	GO:0008152|GO:0009396|GO:0006730|GO:0009396|GO:0046653|GO:0055114	GO:0005739|GO:0005739	GO:0005488|GO:0016787|GO:0000287|GO:0004477|GO:0004487|GO:0004488|GO:0016491|GO:0016787|GO:0042301	chr2	74295734	74295783	GGGTAAGTACGCAACTTACTTTTCCACCAAAGAACTGTCAGCAGCTGCCT
DNAJC9	50114	0.00768846	up	1.39661	0.825168	1.30709	23234	Homo sapiens DnaJ (Hsp40) homolog, subfamily C, member 9 (DNAJC9), mRNA.			GO:0031072	chr10	75002746	75002795	GGCTCTCTACCCAGCTAGAACACCTTCCAGACACTTGCTGGACAGCTATC
LOC100128163	6040576	0.0224458	up	1.39701	-0.053233	0.429114	100128163	PREDICTED: Homo sapiens hypothetical protein LOC100128163 (LOC100128163), mRNA.				chr18	54488312	54488361	ACTCAGTTTGACTTGGCAAGCCTTTCCCAACCGCTTCAGGTGCCTTCCTG
FBLN1	580739	0.0277948	up	1.39706	-1.30031	-0.817921	2192	Homo sapiens fibulin 1 (FBLN1), transcript variant C, mRNA.	GO:0044419	GO:0005576|GO:0005576|GO:0005737|GO:0005576|GO:0005737|GO:0005576|GO:0005576|GO:0005576|GO:0005576|GO:0005578|GO:0005615|GO:0005625|GO:0005737	GO:0005509|GO:0005509|GO:0005509|GO:0005201|GO:0005509|GO:0005515	chr22	44337731	44337780	TCAAGATGGATCTCTCTCGCCACGGCACCGTCAGCTCCTTTGTGGCCAAG
SEMA6A	7050682	0.0212962	up	1.39751	6.60292	7.08578	57556	Homo sapiens sema domain, transmembrane domain (TM), and cytoplasmic domain, (semaphorin) 6A (SEMA6A), mRNA.	GO:0006915|GO:0007010|GO:0007166|GO:0007275|GO:0007399|GO:0007411|GO:0009887|GO:0030154	GO:0016020|GO:0016021|GO:0030424	GO:0004872|GO:0005515	chr5	115809803	115809852	GGTCCATAAACCCGAGTGTGCCTTTGCTTTCCACCCTTGCTAGACACTGG
RNF144	3450136	0.0399424	up	1.39759	2.30023	2.78317	9781	Homo sapiens ring finger protein 144 (RNF144), mRNA.				chr2	7101357	7101406	CCTTCAGTGAGGGGTAGCTACATGCCCCATGCCTGCCCTTTCTTTCCTTC
SULF1	2570240	0.0388524	up	1.39812	-5.7906	-5.30711	23213	Homo sapiens sulfatase 1 (SULF1), mRNA.	GO:0006915|GO:0008152|GO:0030201	GO:0005615|GO:0005783|GO:0005794|GO:0009986	GO:0004065|GO:0005509|GO:0016787	chr8	70735259	70735308	CCTCACTGAGTCATCAGTACCCTCCTATTCAGCTCCCCAAGATGATGTGT
MCM3	6290494	0.0162414	up	1.39813	0.251419	0.734918	4172	Homo sapiens minichromosome maintenance complex component 3 (MCM3), mRNA.	GO:0006260|GO:0006260|GO:0006270|GO:0006350|GO:0006355|GO:0007049	GO:0005634|GO:0005730|GO:0005634|GO:0005654|GO:0005654|GO:0005654|GO:0005654|GO:0005654|GO:0005654|GO:0005654|GO:0005658|GO:0005730|GO:0005737	GO:0000166|GO:0003677|GO:0005524|GO:0000166|GO:0003677|GO:0005515|GO:0005515|GO:0005515|GO:0005515|GO:0005515|GO:0005515|GO:0005515|GO:0005524|GO:0017111	chr6	52237345	52237394	CAGGATGACAATCAGGTCATGGTGTCTGAGGGCATCATCTTCCTCATCTG
TMED9	5390202	0.01037	up	1.3983	-0.402386	0.081288	54732	Homo sapiens transmembrane emp24 protein transport domain containing 9 (TMED9), mRNA.	GO:0006810	GO:0005783|GO:0005789|GO:0005793|GO:0016020|GO:0016021		chr5	176955426	176955475	ACCCACCTGCCACCCTGGGAACCTCACTGTTCTCTCTTTCAGCCTAGACC
ABCA13	1780537	0.0265439	up	1.3993	0.562744	1.04745	154664	Homo sapiens ATP-binding cassette, sub-family A (ABC1), member 13 (ABCA13), mRNA.	GO:0006810	GO:0016020|GO:0016021	GO:0000166|GO:0005524|GO:0016887	chr7	48657433	48657482	GGCCTTTTTCAACACTAACGTTGAGTACCGGTAGCTTGTGATCAAAGGCA
ADCY9	3060100	0.0449459	up	1.39996	-2.17699	-1.6916	115	Homo sapiens adenylate cyclase 9 (ADCY9), mRNA.				chr16	4015212	4015261	TAGCTTGAGAGCCCCACAGGCTCTGCCACACCCGTGACTTCATCCACACT
SMS	4490341	0.0153913	up	1.40001	0.22027	0.705706	6611	Homo sapiens spermine synthase (SMS), mRNA.	GO:0006555|GO:0008215		GO:0004766|GO:0016740|GO:0016768	chrX	21920651	21920700	CTGACAGAAGCACTGTCGCTCTATGAAGAACAGCTGGGGCGCCTGTATTG
JPH1	5490025	0.0153913	up	1.40056	0.729244	1.21524	56704	Homo sapiens junctophilin 1 (JPH1), mRNA.	GO:0007517|GO:0008150	GO:0005792|GO:0005886|GO:0016021|GO:0030018|GO:0030314|GO:0033017	GO:0003674|GO:0008307	chr8	75309933	75309982	CTCACTGCCCCTCCCAAACCCTATAGCTCCTTACGCTGGGAAAGCTGGTT
MCM7	730274	0.0178276	up	1.40069	0.590727	1.07686	4176	Homo sapiens minichromosome maintenance complex component 7 (MCM7), transcript variant 1, mRNA.	GO:0006270|GO:0006260|GO:0006260|GO:0006270|GO:0006350|GO:0006355|GO:0006974|GO:0007049|GO:0042325	GO:0005634|GO:0005737|GO:0000785|GO:0005634|GO:0005634|GO:0005654|GO:0005654|GO:0005654|GO:0005654|GO:0005654|GO:0005654|GO:0005654|GO:0005737|GO:0042555	GO:0000166|GO:0003677|GO:0005524|GO:0017111|GO:0000166|GO:0003677|GO:0005515|GO:0005515|GO:0005515|GO:0005524|GO:0017111	chr7	99698936	99698985	AGATTCTCAGCTTCCCCAGGAGCAAGACCTCTGAGCCCGCCAAGCGCGGC
AP1S2	940706	0.0424346	up	1.40075	0.844989	1.33119	8905	Homo sapiens adaptor-related protein complex 1, sigma 2 subunit (AP1S2), mRNA.	GO:0006886|GO:0016192|GO:0006886|GO:0006897	GO:0030117|GO:0030130|GO:0030131|GO:0005794|GO:0005829|GO:0005905|GO:0016020|GO:0030130|GO:0030131|GO:0030659|GO:0031410	GO:0005515|GO:0008565|GO:0005515|GO:0008565	chrX	15844476	15844525	GTGCTGCACACTTTACAGCAGCTTCCTTTCTTTCCATGGCACTGCCTAGT
SOX18	6100433	0.0435617	up	1.40129	0.121338	0.608099	54345	Homo sapiens SRY (sex determining region Y)-box 18 (SOX18), mRNA.	GO:0001525|GO:0001570|GO:0006350|GO:0006357	GO:0005634	GO:0003700|GO:0003702	chr20	62679220	62679269	TTTTCCAGGAAGCCCGAGCCCAGGACCTGTTGGCAGAGTTGCCAGGGTTA
GPR83	110398	0.0441832	up	1.40161	0.394929	0.882018	10888	Homo sapiens G protein-coupled receptor 83 (GPR83), mRNA.	GO:0007165|GO:0007186|GO:0007186	GO:0005886|GO:0016021|GO:0016021	GO:0004872|GO:0004983|GO:0004872|GO:0004983	chr11	93750259	93750308	GGAGAACCCACTGATGGCTCATTAGATCTGTCCCTTCCCCGAGGTCCGTG
LOC643446	130440	0.0267093	up	1.40361	-0.00592136	0.483218	643446	PREDICTED: Homo sapiens similar to ribonucleic acid binding protein S1 (LOC643446), mRNA.				chr4	10982082	10982131	GAGCCTCCGGACGTGGAGATACAACTCTTGCTCCTAACATTTATCGAGTC
GRIK2	1030240	0.0289281	up	1.40397	0.00865618	0.49817	2898	Homo sapiens glutamate receptor, ionotropic, kainate 2 (GRIK2), transcript variant 1, mRNA.	GO:0006811|GO:0007268|GO:0006811|GO:0007215|GO:0031557|GO:0048172|GO:0050806|GO:0051402	GO:0016020|GO:0016021|GO:0005886|GO:0005887|GO:0030054|GO:0045202|GO:0045211	GO:0004872|GO:0005216|GO:0005234|GO:0015277|GO:0004872|GO:0005216|GO:0005234|GO:0015277	chr6	102623069	102623118	CCATGGCATAAAGCTGGGAGGCCAAACACCCAAGCACAAACTGTCGTCTT
KCNJ2	60719	0.0484716	up	1.40407	-0.190442	0.299168	3759	Homo sapiens potassium inwardly-rectifying channel, subfamily J, member 2 (KCNJ2), mRNA.	GO:0006811|GO:0006813	GO:0005887|GO:0016020	GO:0005242|GO:0005244|GO:0005515|GO:0005515|GO:0030955	chr17	65687523	65687572	GTGTGGCATAGCTACCTGCCCATCCCCAACCCTCAGCAAAGTAGAATCTC
FAM120B	7610121	0.0323483	up	1.40419	0.063089	0.552828	84498	Homo sapiens family with sequence similarity 120B (FAM120B), mRNA.	GO:0006350|GO:0006355|GO:0030154	GO:0005634		chr6	170555940	170555989	AGAGCTTTTGTTGGCTTCTCTCCCGAGCTTGTGCCTGATTCTGTGGCCCA
TMEM178	6520064	0.0143461	up	1.40446	3.21809	3.70811	130733	Homo sapiens transmembrane protein 178 (TMEM178), mRNA.		GO:0005923|GO:0016020|GO:0016021	GO:0005198	chr2	39798310	39798359	ATGCAGCATCTTCAGAACTTGTCCTGATGGTGTCTTATTGTGTCAGCACC
PODXL2	3360669	0.0464699	up	1.40468	3.98914	4.47937	50512	Homo sapiens podocalyxin-like 2 (PODXL2), mRNA.	GO:0007155	GO:0005887|GO:0016020	GO:0005515|GO:0005539	chr3	128874153	128874202	TTCCCGCTTCCCCCGACTTCACACGGCGGCTTCGGACCAACTCCCTCACT
NEK2	1570309	0.0359274	up	1.4051	0.399282	0.889956	4751	Homo sapiens NIMA (never in mitosis gene a)-related kinase 2 (NEK2), mRNA.	GO:0000070|GO:0006468|GO:0007049|GO:0007088|GO:0007126|GO:0051301	GO:0000794|GO:0000922|GO:0005634|GO:0005737|GO:0005813|GO:0005829|GO:0030496	GO:0000166|GO:0000287|GO:0004674|GO:0005515|GO:0005515|GO:0005524|GO:0016740	chr1	211836836	211836885	AGTCCAAGTGCAAGGACCTGAAGAAAAGGCTTCACGCTGCCCAGCTGCGG
C13orf3	4180133	0.0399454	up	1.40519	-0.136375	0.354391	221150	Homo sapiens chromosome 13 open reading frame 3 (C13orf3), mRNA.				chr13	20625849	20625898	CCAAGGACCAAATCCTGGAGTTCTCCCAACTTTAGAGGATGGAAAGGGGC
EXO1	1770646	0.0100785	up	1.40565	-0.0774945	0.413747	9156	Homo sapiens exonuclease 1 (EXO1), transcript variant 1, mRNA.	GO:0006298|GO:0006298|GO:0006298|GO:0006298|GO:0006310|GO:0006955|GO:0007126|GO:0002455|GO:0006281|GO:0016446|GO:0045190|GO:0002455|GO:0006281|GO:0016446|GO:0045190	GO:0005634|GO:0005634	GO:0003677|GO:0004519|GO:0004523|GO:0005515|GO:0005515|GO:0005515|GO:0005515|GO:0005515|GO:0005515|GO:0005515|GO:0005515|GO:0005515|GO:0005515|GO:0005515|GO:0016787|GO:0045145|GO:0048256|GO:0048256|GO:0051908|GO:0051908|GO:0004527|GO:0043566|GO:0004527|GO:0043566	chr1	240119417	240119466	GAAACCCCTGTCCCCAGTCAGAGATAACATCCAACTAACTCCAGAAGCGG
LOC644128	360615	0.043157	up	1.40575	0.0640608	0.555397	644128	PREDICTED: Homo sapiens hypothetical protein LOC644128 (LOC644128), mRNA.				chr8	148694	148743	GGGGTGGCATATTTTGGTCTTATACACTGTGTTCCACCGGCAATGAAAAG
KCTD2	2630521	0.0157729	up	1.40598	0.593942	1.08552	23510	Homo sapiens potassium channel tetramerisation domain containing 2 (KCTD2), mRNA.	GO:0006813|GO:0006813	GO:0008076|GO:0016020|GO:0008076|GO:0016020	GO:0005249|GO:0005515|GO:0005249|GO:0005515	chr17	70573070	70573119	TGGCTGATCACATCAGAGAGGTCTGCGTGGCAGTTTGGGGCTGTCACGTG
LBH	6940164	0.0398455	up	1.40617	-2.29993	-1.80816	81606	PREDICTED: Homo sapiens hypothetical protein DKFZp566J091 (LBH), mRNA.	GO:0006350|GO:0006355|GO:0007275	GO:0005634|GO:0005737					AGCCGCAATTGTTCTGAAAATGTCAAACGAGGCTTCTGTTTTGCACCTGC
GLB1L2	3940014	0.0188671	up	1.40628	0.965838	1.45772	89944	Homo sapiens galactosidase, beta 1-like 2 (GLB1L2), mRNA.	GO:0005975|GO:0008152	GO:0005576|GO:0009341	GO:0004565|GO:0016798|GO:0043169	chr11	133750797	133750846	CCTGCGTCTTCCCAAGTTAGCAGGTGTCTCTGGTGTTCAGTGAGGAGGAC
SSH2	2810468	0.0323483	up	1.40648	0.784738	1.27683	85464	Homo sapiens slingshot homolog 2 (Drosophila) (SSH2), mRNA.	GO:0006470|GO:0030036	GO:0005737|GO:0005856	GO:0003779|GO:0004725|GO:0008138|GO:0016787	chr17	27953206	27953255	GTCCAGAAGACTCTCCTCTGACTGTTACCTTTGCCCCAAGCCACCCCAAA
LOC645431	5080725	0.0302327	up	1.4069	0.275931	0.768452	645431	Homo sapiens hypothetical LOC645431 (LOC645431), non-coding RNA.				chr14	65877530	65877579	CTGCAGTGCCACATCGTGCCTGTCAGTAGCCACTTCAGCCTGGGCAACAT
TACC3	4390484	0.0218674	up	1.40703	-0.203617	0.289034	10460	Homo sapiens transforming, acidic coiled-coil containing protein 3 (TACC3), mRNA.	GO:0006950|GO:0030097|GO:0042994|GO:0051726	GO:0005737|GO:0005813		chr4	1716348	1716512	GGAGCAGAAGACTAAAGAGAACGAGGAGCTGACCAGGATCTGCGACGACC
POLE2	1170326	0.0164316	up	1.4073	-0.126191	0.366736	5427	Homo sapiens polymerase (DNA directed), epsilon 2 (p59 subunit) (POLE2), mRNA.	GO:0006260|GO:0006281|GO:0006297	GO:0005634|GO:0005654|GO:0005654	GO:0003677|GO:0003887|GO:0016740|GO:0016779	chr14	50117090	50117139	CCCAAGGACATCTGACTCCCCTACCTCTTTATGTCTGCCCAGTGTATTGG
CDR2	2140228	0.0347326	up	1.40785	-1.7958	-1.30231	1039	Homo sapiens cerebellar degeneration-related protein 2, 62kDa (CDR2), mRNA.		GO:0005634|GO:0005737	GO:0003674|GO:0005515	chr16	22357429	22357478	GCTGACTTGCCAGCCACAAGCTGCTCTTGCAGAGTTCTTACCATTCCTGT
TUBB6	520255	0.0291551	up	1.40828	-1.56681	-1.07287	84617	Homo sapiens tubulin, beta 6 (TUBB6), mRNA.	GO:0007018|GO:0051258	GO:0005737|GO:0005874|GO:0043234	GO:0000166|GO:0003924|GO:0005198|GO:0005525	chr18	12298740	12298789	AGGCTACGTGGGAGACTCGGCGCTGCAGCTGGAGAGAATCAACGTCTACT
EGLN2	7650653	0.0340977	up	1.4093	0.543812	1.03879	112398	Homo sapiens egl nine homolog 2 (C. elegans) (EGLN2), transcript variant 3, mRNA.	GO:0001558|GO:0001666|GO:0019538|GO:0030520|GO:0045454|GO:0045732|GO:0055114	GO:0005634|GO:0005737	GO:0008198|GO:0016491|GO:0016702|GO:0016706|GO:0019826|GO:0031418|GO:0046872	chr19	46006086	46006135	TGCCACTGCTTGGGCAGAGTAAAAGGTGCCAGGAGGAGCATGGGTGTGGA
SFRS2	3940414	0.048064	up	1.40952	0.128691	0.623895	6427	Homo sapiens splicing factor, arginine/serine-rich 2 (SFRS2), mRNA.	GO:0000398|GO:0008380	GO:0005634|GO:0016605	GO:0000166|GO:0003714|GO:0003723|GO:0005515	chr17	74730507	74730556	CCCGATTGCTCCTGTGTAAAGATGCCTTGTCGTGCAGAAACAAATGGCTG
GSN	2370482	0.0338708	up	1.40983	-3.32768	-2.83216	2934	Homo sapiens gelsolin (amyloidosis, Finnish type) (GSN), transcript variant 2, mRNA.	GO:0016192|GO:0016192|GO:0030041|GO:0051014|GO:0051016	GO:0030027|GO:0005576|GO:0005576|GO:0005737|GO:0005829|GO:0015629|GO:0030027	GO:0003779|GO:0005515|GO:0003779|GO:0003779|GO:0003779|GO:0005509|GO:0005515|GO:0005515|GO:0005515|GO:0005515|GO:0005515|GO:0005515	chr9	123131020	123131069	CTGCCTACCGCACATCCCCACGGCTGAAGGACAAGAAGATGGATGCCCAT
PGP	6200243	0.022924	up	1.4101	0.580494	1.07629	283871	Homo sapiens phosphoglycolate phosphatase (PGP), mRNA.	GO:0001501|GO:0005975|GO:0008152|GO:0016331|GO:0030155|GO:0042475|GO:0042981		GO:0008967|GO:0016787	chr16	2262131	2262180	TAAGTTGGCTCAAGCCGGGTCTGGCCTGACAGGGTGCAGTCACACCAGGA
PHLDA1	5670367	0.0160891	up	1.41112	0.191565	0.688407	22822	Homo sapiens pleckstrin homology-like domain, family A, member 1 (PHLDA1), mRNA.	GO:0006915|GO:0045210	GO:0005634|GO:0005737|GO:0016020|GO:0030659|GO:0031410	GO:0005515	chr12	76419517	76419566	AGCTGGATGGCTGATGGCAGGCTGAGCAGTGGGGAAGCAGGTTTTAACAA
SLC26A6	150692	0.0393789	up	1.41116	0.0767914	0.573669	65010	Homo sapiens solute carrier family 26, member 6 (SLC26A6), transcript variant 3, mRNA.	GO:0006810|GO:0007413|GO:0008272|GO:0006810|GO:0008272|GO:0006810|GO:0008272	GO:0016020|GO:0016021|GO:0016020|GO:0016021|GO:0016020|GO:0016021	GO:0005215|GO:0008271|GO:0005215|GO:0008271|GO:0005215|GO:0008271	chr3	48663185	48663234	CAGTCAGGCTGGCAGTGGCGCGGTACAGGGAGGGAACTGGTGCATATTTT
DPP10	2120619	0.0297246	up	1.41153	1.31767	1.81493	57628	Homo sapiens dipeptidyl-peptidase 10 (DPP10), transcript variant 2, mRNA.	GO:0006508|GO:0006508|GO:0006508	GO:0005624|GO:0016020|GO:0016021|GO:0016020|GO:0016020	GO:0008236|GO:0008239|GO:0008236|GO:0008236	chr2	116317551	116317600	GGTATTCAACTTTTTCCCTGGATGCTTTGGAATCGTGTCTTCCATGCTCC
PRKY	1850687	0.0499643	up	1.41162	1.19517	1.69252	5616	Homo sapiens protein kinase, Y-linked (PRKY), mRNA.	GO:0006468		GO:0000166|GO:0004674|GO:0004713|GO:0005524|GO:0016740	chrY	7309013	7309062	ATCTGGCCTTGCCCCCAGCAGTACAGTCCTTCCTAATAACGGGGATGCTC
HMMR	4050400	0.0449012	up	1.41235	-0.359313	0.138786	3161	Homo sapiens hyaluronan-mediated motility receptor (RHAMM) (HMMR), transcript variant 1, mRNA.		GO:0005737|GO:0009986	GO:0005540|GO:0004872	chr5	162851419	162851468	TTTCTTCAGAGTTTGTCATATACTGCTTGTCATCTGCATGTCTACTCAGC
NEIL3	1980039	0.0164316	up	1.41249	0.0483192	0.54656	55247	Homo sapiens nei endonuclease VIII-like 3 (E. coli) (NEIL3), mRNA.	GO:0006284|GO:0006289	GO:0005622|GO:0005634	GO:0003684|GO:0003906|GO:0008270|GO:0016799|GO:0046872	chr4	178520437	178520486	TGGGCAGATTTGTCCTTCCCATTCTGCAACCATGGCAAGCGTTCCACCAT
LOC643320	7200750	0.0116437	up	1.41278	0.360046	0.858586	643320	PREDICTED: Homo sapiens hypothetical protein LOC643320 (LOC643320), mRNA.				chr10	3284161	3284210	GCAGGAACAGTGCAGATTCCCACATCTACAGCTCAGCACCCACTGCAGGA
CDH12	5090204	0.0337418	up	1.41424	0.646257	1.14628	1010	Homo sapiens cadherin 12, type 2 (N-cadherin 2) (CDH12), mRNA.	GO:0007156	GO:0005886|GO:0016021	GO:0005509|GO:0005515	chr5	21787075	21787124	AGACACCGTCTTTATGTCAAGAAGCAATAGCGACACTCTGACTCTCCTCA
TMEM194A	4610066	0.0119357	up	1.41441	0.909251	1.40945	23306	Homo sapiens transmembrane protein 194A (TMEM194A), transcript variant 2, mRNA.	GO:0008150	GO:0016020|GO:0016021	GO:0003674	chr12	57449506	57449555	CAGGGATGGCTCTTTGCCATGGGTCTTATTTTCACCCTCTTTTCTGTAAG
CCNE2	4760154	0.0327973	up	1.41539	-0.255387	0.245813	9134	Homo sapiens cyclin E2 (CCNE2), transcript variant 2, mRNA.	GO:0000075|GO:0000079|GO:0007049|GO:0051301|GO:0007049|GO:0051301|GO:0006270|GO:0051301|GO:0051726	GO:0005634|GO:0005654|GO:0005654|GO:0005654|GO:0005829|GO:0005829|GO:0005829|GO:0005634|GO:0005634	GO:0005515|GO:0005515|GO:0016538	chr8	95962279	95962328	GCTGTGGCTCCTTCCTAACTGGGGCTTTCTTGACATGTAGGTTGCTTGGT
DGCR5	60491	0.0179086	up	1.4162	1.58215	2.08418	26220	Homo sapiens DiGeorge syndrome critical region gene 5 (non-protein coding) (DGCR5), non-coding RNA.				chr22	17361966	17362015	AGCCACACGGCCAGCTTCGAGGTGCTCATGGACGTCTCCAGGTGTGAGAT
COL4A2	5890279	0.0126478	up	1.41732	-0.688546	-0.185378	1284	Homo sapiens collagen, type IV, alpha 2 (COL4A2), mRNA.	GO:0016525|GO:0030198	GO:0005587|GO:0005576|GO:0005581|GO:0005587|GO:0005587	GO:0005201|GO:0005488	chr13	109962873	109962922	TTCAACTCCCTTCTCGGGGTGGGACAGACGAGACAACAGCACACAGGCAG
DDX56	7380653	0.0365533	up	1.41794	-0.172767	0.33103	54606	Homo sapiens DEAD (Asp-Glu-Ala-Asp) box polypeptide 56 (DDX56), mRNA.	GO:0006364	GO:0005634|GO:0005730	GO:0000166|GO:0003723|GO:0004004|GO:0005515|GO:0005524|GO:0016787	chr7	44605581	44605630	GAAATTCAGACCCACAGCCAAGCCCTCCTGAGGTTGTTGGGCCTCTCTGG
FAM111A	2680278	0.0153913	up	1.41829	-1.64039	-1.13624	63901	Homo sapiens family with sequence similarity 111, member A (FAM111A), transcript variant 1, mRNA.			GO:0003824	chr11	58678868	58678917	GTGCCGGTAGTACAGATAACCCCTCATAAAGATGCTTATCTAACCTCCCC
MMP10	150180	0.0131891	up	1.41887	0.103668	0.608409	4319	Homo sapiens matrix metallopeptidase 10 (stromelysin 2) (MMP10), mRNA.	GO:0006508|GO:0008152|GO:0030574	GO:0005576|GO:0005578|GO:0005615	GO:0004222|GO:0005509|GO:0008233|GO:0008270	chr11	102641558	102641607	CAGTGGATCATCACAGTTTGAGTTTGACCCCAATGCCAGGATGGTGACAC
ANXA2P1	270609	0.0214426	up	1.41893	-4.25368	-3.74889	303	Homo sapiens annexin A2 pseudogene 1 (ANXA2P1) on chromosome 4.				chr4	154448360	154448409	CCAGCAAGACACTAAGGGTGCTGTACCTGTGTGGTGGAGATGGCTGAAGT
PCDH9	160427	0.0278124	up	1.41906	0.542889	1.04783	5101	Homo sapiens protocadherin 9 (PCDH9), transcript variant 1, mRNA.	GO:0007155|GO:0007156|GO:0007155|GO:0007156|GO:0007155|GO:0007156	GO:0005886|GO:0016021|GO:0016020|GO:0016021|GO:0016020|GO:0016021	GO:0005509|GO:0005515|GO:0005509|GO:0005515|GO:0005509|GO:0005515	chr13	66375658	66375707	CCTGTCACTCCTCAGAAATGTCCCAGCTCCACGGGTTTCCACATTCAGGA
TEK	1300326	0.0147912	up	1.41915	-1.44239	-0.937358	7010	Homo sapiens TEK tyrosine kinase, endothelial (venous malformations, multiple cutaneous and mucosal) (TEK), mRNA.	GO:0006468|GO:0007160|GO:0016337|GO:0030334|GO:0045765|GO:0006468|GO:0007160|GO:0007165|GO:0007169|GO:0007267|GO:0016337|GO:0030334|GO:0045765	GO:0016020|GO:0016021|GO:0005886|GO:0005886|GO:0005887	GO:0000166|GO:0004713|GO:0004872|GO:0005524|GO:0016740|GO:0000166|GO:0004714|GO:0004872|GO:0005524|GO:0016740	chr9	27219803	27219852	GACCACTCTGTCTTGTGTTTCCACAGCCTGCAAGTTCAGTCCAGGATGCT
BMP4	990075	0.018703	up	1.42149	-0.030599	0.476802	652	Homo sapiens bone morphogenetic protein 4 (BMP4), transcript variant 3, mRNA.	GO:0001525|GO:0001658|GO:0001934|GO:0007275|GO:0007281|GO:0007500|GO:0007507|GO:0021904|GO:0021978|GO:0030218|GO:0030324|GO:0030501|GO:0030509|GO:0030900|GO:0032331|GO:0040007|GO:0042475|GO:0043010|GO:0045165|GO:0045662|GO:0045669|GO:0045786|GO:0045843|GO:0051145|GO:0051216	GO:0005576|GO:0005578|GO:0005615	GO:0004871|GO:0005125|GO:0005515|GO:0008083|GO:0008201	chr14	53486474	53486523	AGTAGAGGGATGTGGGTGCCGCTGAGATCAGGCAGTCCTTGAGGATAGAC
FOXD4	290377	0.0206669	up	1.42296	0.711873	1.22077	2298	Homo sapiens forkhead box D4 (FOXD4), mRNA.	GO:0006355|GO:0006350|GO:0006355|GO:0007275	GO:0005634|GO:0005634	GO:0003700|GO:0043565|GO:0003700|GO:0008301|GO:0043565	chr9	106546	106595	CCTTCGGTTGTGGCTTCTGTGGCTTTCCCGATTTGCACATGTCCTGGGGT
MAGI1	7210091	0.0373242	up	1.42326	0.887901	1.3971	9223	Homo sapiens membrane associated guanylate kinase, WW and PDZ domain containing 1 (MAGI1), transcript variant 2, mRNA.	GO:0006461|GO:0007155|GO:0007166|GO:0009966	GO:0005886|GO:0005923|GO:0005737|GO:0016020	GO:0000166|GO:0005515|GO:0005524|GO:0008022|GO:0005515|GO:0016301	chr3	65367602	65367651	AACTGCCGCGGTCTTTGGTGGGGGTGGGAAGGGATTTTGTTCTTTTGTTG
STX1A	4860068	0.0212962	up	1.4243	0.205803	0.716057	6804	Homo sapiens syntaxin 1A (brain) (STX1A), mRNA.	GO:0007268|GO:0016192|GO:0006836|GO:0006886|GO:0007268|GO:0016192|GO:0017156|GO:0050796	GO:0016020|GO:0005576|GO:0005886|GO:0005886|GO:0016021	GO:0005515|GO:0000149|GO:0005484|GO:0019855	chr7	72751878	72751927	CGTTGCATGTTTGGGATGGTGGCTCCTGTTGTCTTGCGCTCTGGGAAGTC
TMEM194A	870767	0.0347326	up	1.42557	0.955384	1.46693	23306	Homo sapiens transmembrane protein 194A (TMEM194A), transcript variant 1, mRNA.	GO:0008150	GO:0016020|GO:0016021	GO:0003674	chr12	57449965	57450014	CTTGAAAAGGATGTTGGTGCCTTATGTGACACGAGCCAGAGCCTGCTGGG
KLF6	4040097	0.0349729	up	1.42611	-0.647638	-0.135556	1316	Homo sapiens Kruppel-like factor 6 (KLF6), transcript variant 2, mRNA.	GO:0006350|GO:0006355|GO:0019221|GO:0030183	GO:0005622|GO:0005634|GO:0005737	GO:0003677|GO:0008270|GO:0016563|GO:0016563|GO:0046872	chr10	3811452	3811501	CCCTTCCGAGCGGCGCCTAAGCCTTTGCCGTGAGCATGCACACTGAGAAT
LOC648718	7330181	0.0473097	up	1.42727	0.439083	0.952337	648718	PREDICTED: Homo sapiens hypothetical protein LOC648718 (LOC648718), mRNA.							CACCTCAAATACTGTGGCAGTGACGAAAGAAGAGACTCTCCCGGCCGAGG
SLCO3A1	2470092	0.0166145	up	1.42757	0.963138	1.4767	28232	Homo sapiens solute carrier organic anion transporter family, member 3A1 (SLCO3A1), mRNA.	GO:0006811	GO:0016020|GO:0016021	GO:0005215	chr15	90507108	90507157	CCTGTATGTCAGCATCGCCATCGCGCTCAAATCCTTCGCCTTCATCCTGT
METTL7B	5310142	0.0284447	up	1.42846	-0.229781	0.284681	196410	Homo sapiens methyltransferase like 7B (METTL7B), mRNA.	GO:0008152		GO:0008168|GO:0016740	chr12	54364456	54364505	CCCATGCGTCTCTAGGAACTGGTCACAAAAGTCATGGTGCCTGCATCCCT
TK1	4730196	0.0386934	up	1.4286	-1.53294	-1.01834	7083	Homo sapiens thymidine kinase 1, soluble (TK1), mRNA.	GO:0006139|GO:0006260	GO:0005737|GO:0005829	GO:0000166|GO:0004797|GO:0005524|GO:0016301|GO:0016740|GO:0019206				TGACATCAGCCTGCTTCTTCCCCTCTGCGGCTTTCACTGCTGAGTTTCTG
C16orf59	6560725	0.0263414	up	1.42925	1.18016	1.69542	80178	Homo sapiens chromosome 16 open reading frame 59 (C16orf59), mRNA.				chr16	2454788	2454837	AGGTGGCCTCACTGGCTCTTCTCAGGACAACTAAGCCTGCTGGTCAGGGC
VSTM2B	5700092	0.0177164	up	1.42925	0.303765	0.819026	342865	PREDICTED: Homo sapiens V-set and transmembrane domain containing 2B (VSTM2B), mRNA.		GO:0016020|GO:0016021					ATGACCTGCCCGGGGCCCTCGGTGAGGACCATGTCGCTGGATGGACACAG
FAM111A	3060458	0.0302327	up	1.43093	-1.38826	-0.871304	63901	Homo sapiens family with sequence similarity 111, member A (FAM111A), transcript variant 1, mRNA.			GO:0003824	chr11	58678669	58678718	CAAGCACCCTCCCTCTAGGTCCAGGGACTATCACAGAAGAAGCAGGCATG
SNAI2	50255	0.0265439	up	1.43218	-4.83997	-4.32175	6591	Homo sapiens snail homolog 2 (Drosophila) (SNAI2), mRNA.	GO:0000122|GO:0006350|GO:0006355|GO:0007275|GO:0007499|GO:0007605|GO:0009314	GO:0005622|GO:0005634	GO:0003677|GO:0008270|GO:0046872	chr8	49993911	49993960	CCTGCACAAACATGAGGAATCTGGCTGCTGTGTAGCACACTGAGTGACGC
SEMA6D	870309	0.0235579	up	1.43287	0.143018	0.661924	80031	Homo sapiens sema domain, transmembrane domain (TM), and cytoplasmic domain, (semaphorin) 6D (SEMA6D), transcript variant 5, mRNA.	GO:0007275|GO:0007399|GO:0030154|GO:0007275	GO:0005737|GO:0005886|GO:0016021|GO:0016020|GO:0016021	GO:0004872|GO:0004872	chr15	45844195	45844244	CTCTGTCATTCATCAAATCTCATCCCCTGATGGACTCTGCCGTTCCACCC
E2F7	4560450	0.0306527	up	1.43357	-0.331808	0.187807	144455	Homo sapiens E2F transcription factor 7 (E2F7), mRNA.	GO:0006350|GO:0006355|GO:0007049|GO:0006355	GO:0005634|GO:0005667|GO:0005667	GO:0003700|GO:0042802|GO:0003700	chr12	77415397	77415446	GTTGTCACAGAGGCTGTGTGTGCCCTACACTGACCAGGGTTTGTAAAACC
CCND1	5820601	0.031533	up	1.43476	-0.0541166	0.466698	595	Homo sapiens cyclin D1 (CCND1), mRNA.	GO:0000082|GO:0000320|GO:0001934|GO:0030968|GO:0045444|GO:0045737|GO:0051301|GO:0051726	GO:0000307|GO:0005575|GO:0005622|GO:0005634|GO:0005654|GO:0005654|GO:0005829|GO:0005829	GO:0004672|GO:0005515|GO:0005515|GO:0005515|GO:0005515|GO:0005515|GO:0016538|GO:0019901	chr11	69178329	69178378	CGGCGCTTCCCAGCACCAACATGTAACCGGCATGTTTCCAGCAGAAGACA
GDPD5	1010176	0.0306527	up	1.43659	-1.26239	-0.739734	81544	Homo sapiens glycerophosphodiester phosphodiesterase domain containing 5 (GDPD5), mRNA.	GO:0006071|GO:0006629	GO:0005737|GO:0016020|GO:0016021	GO:0008889|GO:0016787	chr11	74823488	74823537	GTGTCCAGCAGACCTCAAGGCAGAAGGGTCACCTAACCCAGGAGTCCACA
LOC651729	4220403	0.00949059	up	1.43686	0.190891	0.713808	651729	PREDICTED: Homo sapiens hypothetical protein LOC651729 (LOC651729), mRNA.							TTCCCCCAGAATGTGTTGAGTTCTTTGCTGGGCACGAGGGATGCGAAGAG
ACSL1	1030431	0.0309194	up	1.43749	-1.47449	-0.950947	2180	Homo sapiens acyl-CoA synthetase long-chain family member 1 (ACSL1), mRNA.	GO:0008152|GO:0006629|GO:0006631|GO:0007586|GO:0008152|GO:0046320	GO:0005739|GO:0005741|GO:0005777|GO:0005778|GO:0005783|GO:0005789|GO:0005792|GO:0005829|GO:0016020|GO:0016021	GO:0003824|GO:0000287|GO:0004467|GO:0004467|GO:0016874	chr4	185913945	185913994	GGGGTCTGTGAGAGTACATGTATTATATACAAGCACAACAGGGCTTGCAC
SYDE1	2370348	0.0306527	up	1.43809	-2.72665	-2.20249	85360	Homo sapiens synapse defective 1, Rho GTPase, homolog 1 (C. elegans) (SYDE1), mRNA.	GO:0007165|GO:0032862	GO:0005622	GO:0005096|GO:0005100	chr19	15086624	15086673	CACAGAGGAGGGAGCAGTTTGCAGTGCCCAGCCACCCTGAAATCCCCAAT
HK1	2350678	0.0157729	up	1.43863	-0.507562	0.0171386	3098	Homo sapiens hexokinase 1 (HK1), nuclear gene encoding mitochondrial protein, transcript variant 1, mRNA.	GO:0006096	GO:0005739|GO:0005741|GO:0005829|GO:0005829|GO:0016020	GO:0000166|GO:0004396|GO:0004396|GO:0004396|GO:0005524|GO:0016301|GO:0016740	chr10	70748695	70748744	ACCCCGACCGCCAGCATGATCGCCGCGCAGCTCCTGGCCTATTACTTCAC
SLCO3A1	5690491	0.0106309	up	1.43905	0.691246	1.21636	28232	Homo sapiens solute carrier organic anion transporter family, member 3A1 (SLCO3A1), mRNA.	GO:0006811	GO:0016020|GO:0016021	GO:0005215	chr15	90491358	90495197	CATGGCACAGACACCCTCAGTCATCATCCTCATCAGGACAGTCAGCCCTG
GTSE1	6980382	0.0216265	up	1.44171	-0.28232	0.245457	51512	Homo sapiens G-2 and S-phase expressed 1 (GTSE1), mRNA.	GO:0000085|GO:0006977|GO:0007017	GO:0005737|GO:0005881	GO:0003674	chr22	45108031	45108080	CTCTTATCTACCTATGACCTGCGAGCTGCCCACCACCCCCAGTTGTTGCG
FOXM1	540053	0.0397744	up	1.44232	-1.06772	-0.539324	2305	Homo sapiens forkhead box M1 (FOXM1), transcript variant 2, mRNA.	GO:0001558|GO:0001570|GO:0001889|GO:0006350|GO:0006355|GO:0006366|GO:0007049|GO:0008284|GO:0045944	GO:0005634	GO:0003700|GO:0003700|GO:0003700|GO:0003700|GO:0003702|GO:0005515|GO:0005515|GO:0005515|GO:0043565	chr12	2967158	2967207	GCCACCTCCCCGTGTTTCCAAGTCAGCTTTCCTGCAAGAAGAAATCCTGG
PHLDA1	5900725	0.0376928	up	1.44255	-0.0919943	0.436626	22822	Homo sapiens pleckstrin homology-like domain, family A, member 1 (PHLDA1), mRNA.	GO:0006915|GO:0045210	GO:0005634|GO:0005737|GO:0016020|GO:0030659|GO:0031410	GO:0005515	chr12	76423758	76423807	AACAGTCTCTCCGCCCCGCACCAGATCAAGTAGTTTGGACATCACCCTAC
USP46	6060152	0.0114832	up	1.4427	0.94868	1.47745	64854	Homo sapiens ubiquitin specific peptidase 46 (USP46), transcript variant 2, mRNA.	GO:0006511		GO:0004221|GO:0008233|GO:0008234	chr4	53457158	53457207	GGGTTATAAAACTTGTGTGAAGAAGATTGGCCTTCTCCACCTCTCCTGTG
TRMT1	7650278	0.0470453	up	1.4429	0.349572	0.87854	55621	Homo sapiens TRM1 tRNA methyltransferase 1 homolog (S. cerevisiae) (TRMT1), mRNA.	GO:0008033		GO:0003723|GO:0004809|GO:0008168|GO:0008270|GO:0016740|GO:0046872	chr19	13076788	13076837	GTTTCTGCTGATGCTGCCCCTGACTGTCCAGAGACCTCCAACCAGACCCC
LOC649970	630196	0.0296975	up	1.44458	2.2077	2.73835	649970	PREDICTED: Homo sapiens similar to creatine kinase, mitochondrial 1B precursor (LOC649970), mRNA.							CGCATCCCCTGCCTCCATCCTAGTAAAGACTCCTTGCTATGCTGCAGCTG
SH2D5	3450458	0.047235	up	1.44535	-0.325331	0.206086	400745	PREDICTED: Homo sapiens SH2 domain containing 5 (SH2D5), mRNA.			GO:0005515	chr1	20918973	20919022	GAAGGGACCAGTCTCCACCAAGCACTTTAACATCCCTCCAGCCAGCATAG
SH2B3	6560301	0.00768846	up	1.44596	-2.67976	-2.14772	10019	Homo sapiens SH2B adaptor protein 3 (SH2B3), mRNA.	GO:0007242|GO:0030154|GO:0035162	GO:0005634|GO:0005737	GO:0004871|GO:0005515	chr12	110373463	110373512	AAGGCCTTGGACTCTTCCCTGAGGGTTGCCTGAAATTCCTTCATGCTTTC
LOC440353	270747	0.0344164	up	1.44636	0.180153	0.712582	440353	Homo sapiens nuclear pore complex interacting protein pseudogene (LOC440353), non-coding RNA.				chr16	29403002	29403051	TGCGGGGGCCGCTTCCACCCTCAGCGGATGATAATCTCAAGACACCTTCT
VSX2	6370408	0.0114063	up	1.44642	0.16187	0.69436	338917	Homo sapiens visual system homeobox 2 (VSX2), mRNA.	GO:0006355|GO:0007275|GO:0007601|GO:0008284|GO:0008285|GO:0043010|GO:0045165|GO:0050896|GO:0060040	GO:0005634|GO:0005730	GO:0003700|GO:0043565	chr14	73798860	73798909	CCCACCCACCTTTGCAGGGAATACCTCGTTAGAGAATGGCCTGAGACAGT
DCBLD2	830661	0.0335027	up	1.44758	-0.543952	-0.0103134	131566	Homo sapiens discoidin, CUB and LCCL domain containing 2 (DCBLD2), mRNA.	GO:0007155|GO:0030308|GO:0030308|GO:0030522|GO:0042060|GO:0042060|GO:0042060	GO:0005887|GO:0005887|GO:0005887|GO:0009986|GO:0009986|GO:0009986|GO:0016020	GO:0005515	chr3	99997665	99997714	GGTTTGAGCGTCAGTGATATTCTCCCAGAATGTACTTATCTTACCTCGGC
LBH	840369	0.0128007	up	1.44799	-1.84206	-1.30801	81606	Homo sapiens limb bud and heart development homolog (mouse) (LBH), mRNA.	GO:0006350|GO:0006355|GO:0007275	GO:0005634|GO:0005737		chr2	30308056	30308105	ACGCAGGGACCGTTTTTAAATCACAGGGGCGTGTGTCAGCCTGCCCTAGG
LOC554208	4590431	0.0031005	up	1.44915	0.415407	0.950619	554208	PREDICTED: Homo sapiens hypothetical LOC554208, transcript variant 2 (LOC554208), misc RNA.							GACTCCAGACTAGTCTCCTAGGCCATCTAGTAGCTTCTAGGTCTCGGCTC
NAP1L2	5700382	0.0489916	up	1.45059	0.287565	0.824206	4674	Homo sapiens nucleosome assembly protein 1-like 2 (NAP1L2), mRNA.	GO:0006334|GO:0006334	GO:0005634|GO:0005678|GO:0005634		chrX	72433055	72433104	CTCAGGTGATGCACTGGAATCTCAGCAGGAGGGGGTAGTTAGAGAAGTTA
KIAA1772	3390348	0.0376288	up	1.45072	2.09323	2.63	80000	Homo sapiens KIAA1772 (KIAA1772), mRNA.		GO:0016020|GO:0016021		chr18	17342377	17342426	CTCCTTCCAGTGGTCGACATGAGCACGGACTCCTAAACCTTTTCCACGCC
NTRK3	3850402	0.0212962	up	1.45102	1.58047	2.11753	4916	Homo sapiens neurotrophic tyrosine kinase, receptor, type 3 (NTRK3), transcript variant 2, mRNA.	GO:0006468|GO:0007169|GO:0007275|GO:0007399|GO:0030154	GO:0005887|GO:0016020	GO:0000166|GO:0004714|GO:0004872|GO:0005515|GO:0005524|GO:0016740|GO:0043121	chr15	88576108	88576157	GACTCGCATCCCTGTCATTGAGAACCCCCAGTACTTCCGTCAGGGACACA
NRCAM	6980301	0.0265439	up	1.45118	5.19966	5.73689	4897	Homo sapiens neuronal cell adhesion molecule (NRCAM), transcript variant 2, mRNA.	GO:0001764|GO:0007413|GO:0007416|GO:0007417|GO:0016337|GO:0030516|GO:0045162|GO:0045666	GO:0005886|GO:0005887|GO:0009897|GO:0043005	GO:0005515|GO:0030506	chr7	107788832	107788881	CAGAGCTTTGCCTATGGGGCACAGTAGGCCTAGTAACCTGGCATGTTTGA
KIF11	4060176	0.0343101	up	1.4515	0.0282941	0.565837	3832	Homo sapiens kinesin family member 11 (KIF11), mRNA.	GO:0007018|GO:0007049|GO:0007052|GO:0007067|GO:0007100|GO:0051300|GO:0051301	GO:0000922|GO:0005634|GO:0005737|GO:0005871|GO:0005876	GO:0000166|GO:0003777|GO:0005524	chr10	94404566	94404615	TGGGAGACCACCCAGACATCTGACTAATGGCTCTGTGCCACACTCCAAGA
DUSP4	2650041	0.0419254	up	1.45298	0.567593	1.10661	1846	Homo sapiens dual specificity phosphatase 4 (DUSP4), transcript variant 1, mRNA.	GO:0000165|GO:0006470	GO:0005634|GO:0005654	GO:0004725|GO:0004725|GO:0008330|GO:0016787|GO:0017017	chr8	29263496	29263545	AGCGCGGGCTACATCCTAGGTTCGGTCAACGTGCGCTGTAACACCATCGT
EZH2	4180524	0.0414682	up	1.45314	1.00224	1.54141	2146	Homo sapiens enhancer of zeste homolog 2 (Drosophila) (EZH2), transcript variant 2, mRNA.	GO:0006350|GO:0006355|GO:0016568	GO:0005634|GO:0005634|GO:0035098	GO:0003677|GO:0003677|GO:0005515|GO:0005515|GO:0005515|GO:0008168|GO:0016740|GO:0018024	chr7	148511101	148511150	AGTGTGACCCTGACCTCTGTCTTACTTGTGGAGCCGCTGACCATTGGGAC
OAT	7610561	0.0162215	up	1.45414	-0.714421	-0.174253	4942	Homo sapiens ornithine aminotransferase (gyrate atrophy) (OAT), nuclear gene encoding mitochondrial protein, mRNA.	GO:0007601	GO:0005739|GO:0005759	GO:0004587|GO:0005515|GO:0016740|GO:0030170	chr10	126076414	126076463	GGTCCCTGGGAGCCAGCTGGAGACAGGTGGTCCTGTAAAAGCTTTATTCC
OPCML	2970070	0.0199089	up	1.45623	0.301565	0.843804	4978	Homo sapiens opioid binding protein/cell adhesion molecule-like (OPCML), transcript variant 2, mRNA.	GO:0007155|GO:0008038	GO:0005886|GO:0005887|GO:0031225	GO:0004985|GO:0005515	chr11	132285502	132285551	ATGACTTATCAATGGTGCCGTTATAGCTGTGTCAGACAATGGGTGTGCCC
TRIM22	5960747	0.0151963	up	1.45751	-1.12479	-0.581287	10346	Homo sapiens tripartite motif-containing 22 (TRIM22), mRNA.	GO:0006355|GO:0006955|GO:0009615	GO:0005622|GO:0005634	GO:0003700|GO:0003714|GO:0005515|GO:0008270|GO:0046872	chr11	5687830	5687879	GACACCAGTCATACTGGCTCAGGGCCCACCGCTAATGCCTTAATGAAATC
GRB10	5960725	0.0218674	up	1.45887	0.196911	0.741761	2887	Homo sapiens growth factor receptor-bound protein 10 (GRB10), transcript variant 1, mRNA.	GO:0007165|GO:0048009|GO:0007165|GO:0007267|GO:0008286|GO:0048009	GO:0005737|GO:0005886	GO:0004872|GO:0005515|GO:0005070|GO:0005515|GO:0005070|GO:0005070|GO:0005515	chr7	50625870	50625919	GGCCTCGCGCTGGGCGGCTGGGAATTCCACCTGAGAACAAGTCCCGCAAA
PMM2	1260315	0.0354095	up	1.45896	-2.16835	-1.62341	5373	Homo sapiens phosphomannomutase 2 (PMM2), mRNA.	GO:0006486|GO:0008152|GO:0009298	GO:0005737	GO:0004615|GO:0016853	chr16	8850487	8850536	ACCTGGTTCCCTCCAAACCTCCCAGCCACTCGGGCTTGTAACTGTCTGAG
SCN9A	2350168	0.00764478	up	1.45897	0.00991313	0.554866	6335	Homo sapiens sodium channel, voltage-gated, type IX, alpha subunit (SCN9A), mRNA.	GO:0006811|GO:0006814|GO:0006954|GO:0009791|GO:0048266	GO:0001518|GO:0016020|GO:0016021	GO:0005244|GO:0005248|GO:0031402	chr2	166763523	166763572	CAAGTCCAGAAAAAACAGATGCCACTTCATCCACCACCTCTCCACCTTCA
TROAP	4760646	0.0456737	up	1.46192	0.300355	0.848224	10024	Homo sapiens trophinin associated protein (tastin) (TROAP), mRNA.	GO:0007155	GO:0005737	GO:0005515	chr12	48011638	48011687	CGAATGGCAGGATGCCCTGTGTTTCATTCCAGTTGGTTCTGCTGCCCCCC
MCM6	5690274	0.0164316	up	1.46228	-0.057601	0.490619	4175	Homo sapiens minichromosome maintenance complex component 6 (MCM6), mRNA.	GO:0006260|GO:0006260|GO:0006268|GO:0006270|GO:0006350|GO:0006355|GO:0007049	GO:0005634|GO:0005654|GO:0005654|GO:0005654|GO:0005654|GO:0005654|GO:0005654|GO:0005654	GO:0000166|GO:0003677|GO:0003678|GO:0003697|GO:0005524|GO:0042802	chr2	136598167	136598216	GGCTTCAGCACTTCCTTTGGTGTGTTTCCTGTCCCAGTGAAGTTGGAACC
CKAP2	1050672	0.0455991	up	1.46254	0.61084	1.15932	26586	Homo sapiens cytoskeleton associated protein 2 (CKAP2), transcript variant 2, mRNA.	GO:0006915|GO:0007049	GO:0005737|GO:0005874		chr13	51947829	51947878	CTTGCGTCCCTTGGACTGCCTGTTGATTGATGGAAAGTGTCTGCACTGAC
RAI14	6370187	0.0106309	up	1.4652	-0.175973	0.375127	26064	Homo sapiens retinoic acid induced 14 (RAI14), mRNA.		GO:0005737|GO:0005739|GO:0005856	GO:0005515	chr5	34868227	34868276	TGTCACAGCACTTCAGAAAATACACAACAGCCCCTTCTGCCCCCGCACAG
IRS1	1710091	0.0162215	up	1.46663	-0.344614	0.207892	3667	Homo sapiens insulin receptor substrate 1 (IRS1), mRNA.	GO:0007165|GO:0008286|GO:0008286|GO:0043491|GO:0048009	GO:0005634|GO:0005737|GO:0005792|GO:0005886|GO:0005901	GO:0004871|GO:0004871|GO:0005069|GO:0005158|GO:0005158|GO:0005159|GO:0005515|GO:0005515|GO:0005515|GO:0019901|GO:0042169|GO:0043548|GO:0043548	chr2	227308884	227308933	AGTGAGCTGATGTGCCCACCACCGTGTCATGAGAGAATGGGTTTACTCTC
FOXD4L1	3390563	0.0332294	up	1.4667	0.959269	1.51184	200350	Homo sapiens forkhead box D4-like 1 (FOXD4L1), mRNA.	GO:0006350|GO:0006355	GO:0005634	GO:0003700|GO:0043565	chr2	113974803	113974852	AACCTTCGCAGGGCGTCAAGTCATCTTTTCTTGCCTTCGGCTGTGGCTTC
C9orf129	3310196	0.0106309	up	1.46695	0.291663	0.844486	445577	Homo sapiens chromosome 9 open reading frame 129 (C9orf129), mRNA.				chr9	96080628	96080677	CCCAGGGAACCGGCACTCTACTGAGGACAAAGCAGGGCTCACCTAGCAAT
GRIK2	3840246	0.0386675	up	1.46697	0.00903003	0.56187	2898	Homo sapiens glutamate receptor, ionotropic, kainate 2 (GRIK2), transcript variant 1, mRNA.	GO:0006811|GO:0007268|GO:0006811|GO:0007215|GO:0031557|GO:0048172|GO:0050806|GO:0051402	GO:0016020|GO:0016021|GO:0005886|GO:0005887|GO:0030054|GO:0045202|GO:0045211	GO:0004872|GO:0005216|GO:0005234|GO:0015277|GO:0004872|GO:0005216|GO:0005234|GO:0015277	chr6	102610058	102610107	CATTGTTCTGGCAGCCGGCTTGGTGCTTTCAGTTTTTGTGGCAGTGGGAG
CENPE	2510639	0.0205212	up	1.46791	-0.154651	0.399111	1062	Homo sapiens centromere protein E, 312kDa (CENPE), mRNA.	GO:0000089|GO:0007018|GO:0007049|GO:0007079|GO:0007080|GO:0051301|GO:0051382	GO:0000775|GO:0000940|GO:0005634|GO:0005819|GO:0005874|GO:0005875	GO:0000166|GO:0003777|GO:0005515|GO:0005524|GO:0043515	chr4	104246812	104246861	CAGGCAAGGATGTGCCTGAGTGCAAAACTCAGTAGACTCCTCTTTGTCAC
LMNB1	3420593	0.0147912	up	1.46983	2.90437	3.46002	4001	Homo sapiens lamin B1 (LMNB1), mRNA.		GO:0005634|GO:0005638|GO:0005634|GO:0005637|GO:0005638|GO:0016020	GO:0005198|GO:0005198	chr5	126154649	126154698	GAACTTTTCCACCAGCAGGGAACCCCAAGAGCATCCAATAGAAGCTGTGC
LEPRE1	1240739	0.0140281	up	1.47089	-2.34297	-1.78627	64175	Homo sapiens leucine proline-enriched proteoglycan (leprecan) 1 (LEPRE1), mRNA.	GO:0008285|GO:0019538|GO:0055114	GO:0005576|GO:0005578|GO:0005783	GO:0003674|GO:0005506|GO:0016491|GO:0016702|GO:0016706|GO:0019797|GO:0031418|GO:0046872	chr1	42984806	42984855	TACATCTGCCACTCAGCCGAGGGGACCCTGCTCACAGCCTTCTACATGGT
PCDH9	1340709	0.0428076	up	1.47183	0.728667	1.28628	5101	Homo sapiens protocadherin 9 (PCDH9), transcript variant 2, mRNA.	GO:0007155|GO:0007156|GO:0007155|GO:0007156|GO:0007155|GO:0007156	GO:0005886|GO:0016021|GO:0016020|GO:0016021|GO:0016020|GO:0016021	GO:0005509|GO:0005515|GO:0005509|GO:0005515|GO:0005509|GO:0005515	chr13	66103497	66697539	CAGTCGCAGCGCCGTGTTACGTTTCATCTCCCTGATGGCTCCCAGGAAAG
BCAT2	6560497	0.0145029	up	1.47356	-1.11056	-0.551261	587	Homo sapiens branched chain aminotransferase 2, mitochondrial (BCAT2), nuclear gene encoding mitochondrial protein, mRNA.	GO:0008152|GO:0009082|GO:0009083	GO:0005737|GO:0005739|GO:0005739	GO:0004084|GO:0004084|GO:0016740	chr19	53990412	53990461	GTAGCATCTCGTCACGCCAGCACTCGCCTCCCTACCAATGACTCACCTGA
FGF9	6420746	0.0340977	up	1.47376	-0.0741913	0.485307	2254	Homo sapiens fibroblast growth factor 9 (glia-activating factor) (FGF9), mRNA.	GO:0001525|GO:0001649|GO:0002053|GO:0002062|GO:0006606|GO:0007165|GO:0007267|GO:0008584|GO:0030178|GO:0030238|GO:0030324|GO:0030326|GO:0030949|GO:0042472|GO:0045743|GO:0045880|GO:0048505|GO:0048566|GO:0048706|GO:0050679|GO:0060045	GO:0005576|GO:0005576|GO:0005576|GO:0005576|GO:0005576|GO:0005615	GO:0008083|GO:0008201	chr13	21173998	21174047	AGCTGCCATACTTCGACTTATCAGGATTCTGGCTGGTGGCCTGCGCGAGG
KIF14	2810201	0.0131217	up	1.47471	-0.0129609	0.54747	9928	Homo sapiens kinesin family member 14 (KIF14), mRNA.	GO:0007018	GO:0005634|GO:0005737|GO:0005819|GO:0005874|GO:0005875	GO:0000166|GO:0003777|GO:0005524	chr1	198788286	198788335	GCTTGCTGGCACAGTAGTTTACCCTGTTATCTGTGTTTCATAATGGGGGC
MVK	6620768	0.00949059	up	1.47471	0.0190544	0.579486	4598	Homo sapiens mevalonate kinase (mevalonic aciduria) (MVK), mRNA.	GO:0006695|GO:0008152|GO:0008299|GO:0016310	GO:0005737|GO:0005777	GO:0000166|GO:0004496|GO:0005524|GO:0016740|GO:0042802	chr12	108519101	108519150	TGGGTCCAATGCTCAGGTGCTGGGGCCTGGTTCCCGGAGAAGTGTGCCTT
METRNL	10224	0.0306527	up	1.47474	-1.25638	-0.695919	284207	PREDICTED: Homo sapiens meteorin, glial cell differentiation regulator-like (METRNL), mRNA.		GO:0005576					CCGTGTGCATCAGGTCCTTCACGGACTCCTCGGGGGCCAATATTTATTTG
MEGF11	3170180	0.0162414	up	1.47503	0.232666	0.793406	84465	Homo sapiens multiple EGF-like-domains 11 (MEGF11), mRNA.		GO:0005886|GO:0016021|GO:0016323		chr15	63975021	63975070	GGCAGAGGGTGTGATTATGGTGACAATAGCTGCCTTCCCCTATCGAACAG
MAF	3610440	0.0218674	up	1.47528	1.0315	1.59249	4094	Homo sapiens v-maf musculoaponeurotic fibrosarcoma oncogene homolog (avian) (MAF), transcript variant 1, mRNA.	GO:0001816|GO:0006355|GO:0045944	GO:0000785|GO:0005634|GO:0005737	GO:0003700|GO:0003702|GO:0043565|GO:0046983	chr16	78185938	78190218	GCAGCGACAACCCGTCCTCTCCCGAGTTTTTCATAACTGAGCCCACTCGC
GMDS	6840156	0.0119357	up	1.47727	-0.77446	-0.211525	2762	Homo sapiens GDP-mannose 4,6-dehydratase (GMDS), mRNA.	GO:0005975|GO:0007159|GO:0019673|GO:0042351|GO:0044237|GO:0008152|GO:0019673	GO:0005622|GO:0005737|GO:0005622	GO:0005488|GO:0008446|GO:0016491|GO:0016829|GO:0050662|GO:0003824|GO:0005488|GO:0008446	chr6	1906150	1906199	CCTCCAGGGTTTGGGTCGCTTTGCGTTTGTCGAAGCCTCCTCTGAATGGC
C11orf41	6200025	0.0425606	up	1.47958	0.920949	1.48613	25758	Homo sapiens chromosome 11 open reading frame 41 (C11orf41), mRNA.		GO:0005634|GO:0005737|GO:0016020|GO:0016021		chr11	33647464	33647513	GAACTTTGTACGTCCTTAGCCTCTGCCGGGAACAGAGTGTTCATATGCTG
PQLC1	4640131	0.0460956	up	1.48099	-0.165206	0.401357	80148	Homo sapiens PQ loop repeat containing 1 (PQLC1), mRNA.		GO:0016020|GO:0016021		chr18	75763552	75763601	CTTGAATGTCTGAGTGAGGGTCCTGCTTAGCTCTTTGGCCTGTGAGATGC
AFAP1	2690187	0.0478735	up	1.48162	-0.353296	0.213877	60312	Homo sapiens actin filament associated protein 1 (AFAP1), transcript variant 2, mRNA.		GO:0005737|GO:0005856	GO:0003779	chr4	7812689	7812738	TTTCACGTGGTGTAACCCTAGACTGGCGCCCTTGGCGTGCCCCTTTGTGT
TEK	7570176	0.018485	up	1.48315	-1.57918	-1.01051	7010	Homo sapiens TEK tyrosine kinase, endothelial (venous malformations, multiple cutaneous and mucosal) (TEK), mRNA.	GO:0006468|GO:0007160|GO:0016337|GO:0030334|GO:0045765|GO:0006468|GO:0007160|GO:0007165|GO:0007169|GO:0007267|GO:0016337|GO:0030334|GO:0045765	GO:0016020|GO:0016021|GO:0005886|GO:0005886|GO:0005887	GO:0000166|GO:0004713|GO:0004872|GO:0005524|GO:0016740|GO:0000166|GO:0004714|GO:0004872|GO:0005524|GO:0016740	chr9	27219801	27219850	GTGACCACTCTGTCTTGTGTTTCCACAGCCTGCAAGTCAGTCCAGGATGC
VSTM2A	5870091	0.0327988	up	1.48339	0.726585	1.29548	222008	Homo sapiens V-set and transmembrane domain containing 2A (VSTM2A), mRNA.		GO:0005576		chr7	54585277	54585326	ATGGCTCTGCCAACCAACGAACGCACTCCACCTCCAGCCCTCAAGTGGTA
RAB31	6590341	0.0300842	up	1.48389	0.860971	1.43036	11031	Homo sapiens RAB31, member RAS oncogene family (RAB31), mRNA.	GO:0007264|GO:0015031	GO:0005886	GO:0000166|GO:0003924|GO:0005525	chr18	9852301	9852350	CCCTGTAGTCCAGTGGTGCTGCCCTGTTGTGCAAACTGCTCCTTTTTCTC
COL8A1	2510091	0.0339074	up	1.48618	-3.25651	-2.68489	1295	Homo sapiens collagen, type VIII, alpha 1 (COL8A1), transcript variant 2, mRNA.	GO:0007155|GO:0048593|GO:0050673	GO:0005576|GO:0005591|GO:0005604	GO:0005198|GO:0005515	chr3	99514877	99514926	GAGACCGGGTGTTCCTCCAGATGCCCTCAGAACAGGCTGCAGGACTGTAT
RAD54L	1980291	0.0267585	up	1.48658	0.183973	0.755968	8438	Homo sapiens RAD54-like (S. cerevisiae) (RAD54L), mRNA.	GO:0000724|GO:0006310|GO:0007126|GO:0010212|GO:0042493|GO:0051276	GO:0005634	GO:0000166|GO:0003677|GO:0004386|GO:0005524|GO:0016787	chr1	46516548	46516597	GCTGGTCTGGGTGTAGCTCTTAGAGGAAGGAGATAGGGAAAAGGGGCTCC
KIF18A	2470035	0.0201965	up	1.48666	-0.265088	0.306983	81930	Homo sapiens kinesin family member 18A (KIF18A), mRNA.	GO:0007018|GO:0015031	GO:0005634|GO:0005737|GO:0005874|GO:0005875|GO:0042995	GO:0000166|GO:0003777|GO:0005524	chr11	27999027	27999076	CCCTGAGTGTAAGTTACCATGGTGGCAGCTTAGTTTTACTATGCCACAAC
SRGAP1	2470220	0.0362929	up	1.48673	1.21069	1.78283	57522	Homo sapiens SLIT-ROBO Rho GTPase activating protein 1 (SRGAP1), mRNA.	GO:0007165|GO:0007266|GO:0016477	GO:0005622	GO:0005096|GO:0005100|GO:0005515|GO:0017048	chr12	62823596	62823645	CCCTGTGTTCTCCTCTGTGGAAATGAAGGCAGCAAGAAGCACCTGAGGCC
C22orf42	5290064	0.0471648	up	1.488	0.908346	1.48172	150297	Homo sapiens chromosome 22 open reading frame 42 (C22orf42), mRNA.				chr22	32545758	32546345	GCCTATCTGTCTCTCTTGAAGACCTCATGACACCGGAGATGGCAAAGGAG
CACNA1C	7510670	0.0323483	up	1.48838	-1.42294	-0.849199	775	Homo sapiens calcium channel, voltage-dependent, L type, alpha 1C subunit (CACNA1C), mRNA.	GO:0006811|GO:0006816|GO:0006811|GO:0006816|GO:0006811|GO:0006816|GO:0006811|GO:0006816|GO:0007204	GO:0005891|GO:0016020|GO:0016021|GO:0016020|GO:0016021|GO:0016020|GO:0016021|GO:0005737|GO:0005886|GO:0005891|GO:0014069|GO:0016021	GO:0005216|GO:0005245|GO:0005216|GO:0005245|GO:0005216|GO:0005245|GO:0005244|GO:0005509|GO:0005516|GO:0015270	chr12	2671892	2671941	CAGTCCCCCCTTTCTGGTTTAGCTGTGGGAAGATCTGAATCTGGGGCCGT
MVD	1440020	0.00874808	up	1.48981	0.636753	1.21188	4597	Homo sapiens mevalonate (diphospho) decarboxylase (MVD), mRNA.	GO:0006695|GO:0008299|GO:0016310	GO:0005829	GO:0004163|GO:0004163|GO:0005524|GO:0016301|GO:0016829	chr16	88718605	88718654	AGGGCTGAAGGGCTTTCTCACCCCAGCTCTGGCTATGCCCAGTTCTCTGA
FAM83D	150543	0.0323483	up	1.49065	-0.253215	0.322725	81610	Homo sapiens family with sequence similarity 83, member D (FAM83D), mRNA.				chr20	37014583	37014632	CCGTGTTCAGACTCCTGGTTTCTTCCAGGCTTACAGTGGACATCATCAGC
HPRT1	7610286	0.0439724	up	1.49229	-2.5411	-1.96357	3251	Homo sapiens hypoxanthine phosphoribosyltransferase 1 (Lesch-Nyhan syndrome) (HPRT1), mRNA.	GO:0001975|GO:0006164|GO:0006166|GO:0006168|GO:0006178|GO:0007625|GO:0009116|GO:0019835|GO:0021756|GO:0021895|GO:0021954|GO:0045964|GO:0046651|GO:0048813|GO:0006164|GO:0006166|GO:0007610|GO:0009116|GO:0045964|GO:0046100|GO:0051289	GO:0005737|GO:0005737|GO:0005829	GO:0004422|GO:0016740|GO:0042802|GO:0000287|GO:0004422|GO:0004422|GO:0004422|GO:0005515|GO:0016757|GO:0042803	chrX	133455271	133460119	TGGTCAAGGTCGCAAGCTTGCTGGTGAAAAGGACCCCACGAAGTGTTGGA
ETV5	770746	0.01795	up	1.49307	-0.346037	0.232243	2119	Homo sapiens ets variant gene 5 (ets-related molecule) (ETV5), mRNA.	GO:0006355	GO:0005634	GO:0003700|GO:0043565	chr3	187247011	187247060	GGGCATAGGACAGCGGCATCACGGTTGCATTCCCATTGGACTCATGCACC
LCTL	4780347	0.018485	up	1.49496	0.44274	1.02285	197021	Homo sapiens lactase-like (LCTL), mRNA.	GO:0005975	GO:0005783|GO:0005789|GO:0016020|GO:0016021	GO:0003824|GO:0004553|GO:0043169	chr15	66845335	66845384	TCTGGGGTCTAAATGGCTATATTCTGTGCCATGGGGATTTAGGAGGCTCC
KIF20B	5900433	0.0460767	up	1.49621	-0.39565	0.185664	9585	Homo sapiens kinesin family member 20B (KIF20B), mRNA.				chr10	91492662	91492711	CCAGCCACTGGTAACCATTCTTCTACTCTGTATGCCCATGAGGTCAATTG
ATOH8	3840376	0.00461388	up	1.49755	-2.79107	-2.20846	84913	Homo sapiens atonal homolog 8 (Drosophila) (ATOH8), mRNA.	GO:0006355|GO:0007275|GO:0007399|GO:0030154	GO:0005634	GO:0003677|GO:0030528	chr2	85868438	85868487	TGAGGAAGGAGTAGAGGCTGGGTTGGCTGGAGCCGTCCTACTGGGCAAGA
EPB41L4B	6250221	0.0265439	up	1.49822	1.19765	1.7809	54566	Homo sapiens erythrocyte membrane protein band 4.1 like 4B (EPB41L4B), transcript variant 2, mRNA.		GO:0005737|GO:0005856|GO:0019898|GO:0005737|GO:0005856|GO:0019898|GO:0005737|GO:0005856|GO:0019898	GO:0005200|GO:0005488|GO:0008092|GO:0005488|GO:0008092|GO:0005488|GO:0008092	chr9	111934535	111934584	GGCTTCTGCTCTTCACCTCCTGCTCGCTGATGGAAACCTCCAGGGCAAAG
TTF2	2190220	0.0342556	up	1.49897	-1.86372	-1.27974	8458	Homo sapiens transcription termination factor, RNA polymerase II (TTF2), mRNA.	GO:0006350|GO:0006353|GO:0006355|GO:0006397|GO:0008380	GO:0005634|GO:0005681|GO:0005737|GO:0008023	GO:0000166|GO:0003677|GO:0003717|GO:0005524|GO:0008026|GO:0008094|GO:0008270|GO:0016787	chr1	117446481	117446530	CAGCCATCTCTGCAGTTCTCTCAGTGCAGGCAGTTCTTCCTCTCAGGCTG
POLE	2000010	0.0174535	up	1.49909	-0.0548549	0.529231	5426	Homo sapiens polymerase (DNA directed), epsilon (POLE), mRNA.	GO:0000082|GO:0000731|GO:0006139|GO:0006297	GO:0005634|GO:0005654|GO:0005654	GO:0000166|GO:0003677|GO:0003682|GO:0003887|GO:0005515|GO:0008270|GO:0016740|GO:0016779|GO:0046872	chr12	133200609	133200658	GCCTCAGGAAAACAAGACCTCTGTGCACCTCACTTTTGGCTCACTGCAGC
CACNB3	1980328	0.0421559	up	1.50129	1.27106	1.85726	784	Homo sapiens calcium channel, voltage-dependent, beta 3 subunit (CACNB3), mRNA.	GO:0006811|GO:0006816|GO:0050852	GO:0005829|GO:0005891|GO:0005891|GO:0016020	GO:0005244|GO:0005509|GO:0005515|GO:0015270	chr12	47508870	47508919	GCACAGAGGACCTGTCTCCCCGGCTACTCTTGCCTTATGGCTCTAGTGTG
PITRM1	1510072	0.0250632	up	1.50166	-1.43832	-0.851761	10531	Homo sapiens pitrilysin metallopeptidase 1 (PITRM1), mRNA.	GO:0006508|GO:0006508|GO:0006508|GO:0006508	GO:0005634|GO:0005739|GO:0005759	GO:0003824|GO:0004222|GO:0008270|GO:0046872|GO:0008237|GO:0008270|GO:0004222|GO:0008270|GO:0004222|GO:0008047|GO:0008233|GO:0008270|GO:0046872	chr10	3190421	3190470	TCCTCGGACCCGAGAACCCGAAAATTGCCAAGGACCCATCCTGGATCATC
METRNL	1510168	0.0147912	up	1.5025	-0.995476	-0.408112	284207	Homo sapiens meteorin, glial cell differentiation regulator-like (METRNL), mRNA.		GO:0005576		chr17	78631095	78631144	CTGCTGGGCGGCGCGGGCGCGCAGTACTCCAGCGACCGGTGCAGCTGGAA
UBE2Q1	6330754	0.0492723	up	1.50256	0.935109	1.52253	55585	Homo sapiens ubiquitin-conjugating enzyme E2Q (putative) 1 (UBE2Q1), mRNA.	GO:0006511|GO:0043687|GO:0051246		GO:0000166|GO:0004842|GO:0005524|GO:0016874	chr1	152787792	152787841	GGTTTTCAAGGCCTCTGTGGCTTTCTTCTGAACTTACCACCAGCCCTGGC
PPP4R1	5560020	0.0443629	up	1.50396	0.0898886	0.678651	9989	Homo sapiens protein phosphatase 4, regulatory subunit 1 (PPP4R1), transcript variant 2, mRNA.	GO:0007165	GO:0005625	GO:0005515|GO:0030362	chr18	9560237	9560286	CAGCCCTGTGTGTGAATCGTTTGTGACGTGTGCAAATGGGAAAGGAGGGG
GALE	6980162	0.0407686	up	1.50444	-0.139236	0.449989	2582	Homo sapiens UDP-galactose-4-epimerase (GALE), transcript variant 1, mRNA.	GO:0006012|GO:0044237|GO:0006012|GO:0044237|GO:0006012|GO:0044237|GO:0006012|GO:0044237|GO:0006012|GO:0044237|GO:0005975|GO:0006012|GO:0044237	GO:0005634|GO:0005737|GO:0005829	GO:0003824|GO:0003978|GO:0005488|GO:0050662|GO:0003824|GO:0003978|GO:0005488|GO:0050662|GO:0003824|GO:0003978|GO:0005488|GO:0050662|GO:0003824|GO:0003978|GO:0005488|GO:0050662|GO:0003824|GO:0003978|GO:0005488|GO:0050662|GO:0003978|GO:0003978|GO:0005488|GO:0016853|GO:0050662	chr1	24122239	24122288	GGCCAAGGGCTCCACTGACCAGGAGGCCGAGGTCTCTAACTCTTATCTTC
LOC100129034	6590349	0.0100785	up	1.50554	0.401889	0.992169	100129034	PREDICTED: Homo sapiens hypothetical protein LOC100129034 (LOC100129034), mRNA.							CGCGACCCTGCGGGCAGCGCTTAGGACTGCACATTTACATTTCCCAAATG
PITX2	3440671	0.0205212	up	1.50741	-0.642911	-0.0508394	5308	Homo sapiens paired-like homeodomain 2 (PITX2), transcript variant 3, mRNA.	GO:0006355|GO:0007275|GO:0007368|GO:0009887	GO:0005634|GO:0005667	GO:0003700|GO:0008134|GO:0008134|GO:0043565	chr4	111758721	111758770	AACCTGAGTGCTTGCCAGTATGCAGTGGACCGGCCCGTGTGAGCCGCACC
SRGAP2	4860220	0.0171315	up	1.50784	0.0690673	0.661552	23380	Homo sapiens SLIT-ROBO Rho GTPase activating protein 2 (SRGAP2), transcript variant 1, mRNA.	GO:0007165|GO:0007165	GO:0005622|GO:0005743|GO:0005622|GO:0005743	GO:0005096|GO:0005515|GO:0005515	chr1	204704078	204704127	GGAGGAGAGTCCTTCTCGGCAGAGCTCACTGCAAACAACTGGAATTGAGG
MAN2A1	3990608	0.045903	up	1.50833	-1.9713	-1.37834	4124	Homo sapiens mannosidase, alpha, class 2A, member 1 (MAN2A1), mRNA.	GO:0001701|GO:0001889|GO:0005975|GO:0006013|GO:0006491|GO:0007005|GO:0007033|GO:0007585|GO:0008152|GO:0048286	GO:0000139|GO:0005794|GO:0016020|GO:0016021	GO:0004559|GO:0004572|GO:0008270|GO:0016799|GO:0030246|GO:0046872	chr5	109120462	109120511	GAGTCCAATGGAAATCAGCACATTCCGAATCCAGTTGAGGTGAACCTGAC
BLCAP	2690524	0.0247803	up	1.50928	0.685983	1.27984	10904	Homo sapiens bladder cancer associated protein (BLCAP), mRNA.		GO:0016020|GO:0016021		chr20	36146032	36146081	AGTGTTGGCAAACGAGACTTTCTCCTGGCCCCTGCCTGCTGGAGATCAGC
DPF1	6020554	0.048064	up	1.51009	1.20589	1.80052	8193	Homo sapiens D4, zinc and double PHD fingers family 1 (DPF1), mRNA.	GO:0006350|GO:0006355|GO:0006917	GO:0005634|GO:0005737|GO:0005622	GO:0005515|GO:0008270|GO:0046872|GO:0005515|GO:0008270|GO:0046872	chr19	43394475	43394524	CGACTCTGGGGTGGTGCTCGCCTACCTGCCTCTCCGAGCTCCTCAATTCT
CCNB2	5360070	0.0171315	up	1.51075	0.138141	0.733408	9133	Homo sapiens cyclin B2 (CCNB2), mRNA.	GO:0007049|GO:0007067|GO:0051301	GO:0005634|GO:0005829|GO:0015630	GO:0005515	chr15	57204299	57204348	CAGCATGATCCCTCAGCTGAACTCAAAAGCCGTCAAAGACCTTGCCTCCC
C1R	7510491	0.0467274	up	1.51165	0.078485	0.674613	715	PREDICTED: Homo sapiens complement component 1, r subcomponent, transcript variant 2 (C1R), mRNA.	GO:0006508|GO:0006958|GO:0045087	GO:0005576|GO:0005576|GO:0005576	GO:0004252|GO:0005509|GO:0008233	chr12	7132861	7132910	CCATGGGCTGGGTAAGTTCCCACACAACTAGAATTGGGTCATGGGGATCC
FBXO5	4010097	0.0397584	up	1.51184	0.163328	0.75963	26271	Homo sapiens F-box protein 5 (FBXO5), mRNA.	GO:0006511|GO:0007049|GO:0007067|GO:0007346|GO:0051301|GO:0051436|GO:0051436|GO:0051437|GO:0000089|GO:0001556|GO:0007057|GO:0007128|GO:0007346|GO:0016050|GO:0040020|GO:0046785|GO:0051225|GO:0051442	GO:0005634|GO:0005654|GO:0005654|GO:0005654|GO:0005654|GO:0005737|GO:0005819|GO:0005829|GO:0005737	GO:0005515|GO:0005515|GO:0008270|GO:0046872	chr6	153334023	153334072	GATGGCAAGCTCCTCAAAGCCAGTTGTAAAATAGGTCCCCTGCCTGGTAC
SEMA5A	3390575	0.0153913	up	1.51388	-1.07726	-0.479015	9037	Homo sapiens sema domain, seven thrombospondin repeats (type 1 and type 1-like), transmembrane domain (TM) and short cytoplasmic domain, (semaphorin) 5A (SEMA5A), mRNA.	GO:0001569|GO:0007155|GO:0007267|GO:0007275|GO:0007399|GO:0007411|GO:0030154	GO:0016020|GO:0016021|GO:0043231	GO:0004872|GO:0008046	chr5	9092140	9092189	GTGGGAGTCAAAGCCTATTTTGCTGAGTGTTCCCACTGGATCCTCTGTAG
GPX3	5490019	0.0204981	up	1.5148	-0.450203	0.148921	2878	Homo sapiens glutathione peroxidase 3 (plasma) (GPX3), mRNA.	GO:0006979|GO:0006982|GO:0042744|GO:0051289|GO:0055114	GO:0005576|GO:0005615	GO:0004602|GO:0004602|GO:0008134|GO:0008430|GO:0008430|GO:0016491	chr5	150388660	150388709	CTTCGGAGGACGTGCCCTCACCCCTCACTGGTCCACTGGCTTGAGACTCA
DKFZp686O24166	5670187	0.0139183	up	1.51498	0.121822	0.721124	374383	Homo sapiens hypothetical protein DKFZp686O24166 (DKFZp686O24166), mRNA.				chr11	17355122	17355171	CAACACATAGGCCTTCCCAGACATGCACCCTCATGGGATTCCAGACCCCC
SIK3	4230035	0.0291683	up	1.51559	0.127835	0.727718	23387	Homo sapiens SIK family kinase 3 (SIK3), mRNA.				chr11	116714311	116714360	GCACCCTCCAGCAACAACAGATGAAAGCCAGTGAGCCTACTAACCGTGCC
HERC5	5720482	0.0256295	up	1.51671	2.08363	2.68457	51191	Homo sapiens hect domain and RLD 5 (HERC5), mRNA.	GO:0000079|GO:0006464|GO:0006511|GO:0006464|GO:0006511	GO:0005622|GO:0005737|GO:0005622	GO:0016874|GO:0016881|GO:0016874|GO:0016881	chr4	89427202	89427251	GGCCGGTTAGAACCCGTGACTGTATTCTCTCCCTTGGATACCCCTATGCC
ABCG4	3360390	0.0361897	up	1.51793	0.79428	1.39638	64137	Homo sapiens ATP-binding cassette, sub-family G (WHITE), member 4 (ABCG4), mRNA.	GO:0006810	GO:0016020|GO:0016021	GO:0000166|GO:0005524|GO:0016887|GO:0042803|GO:0046982|GO:0005524	chr11	118538464	118538513	TCCCTGTCTACCTCCTCTCACCCTGCCACAGATTCTTCCTATCACACAGG
ORC6L	4830343	0.0332294	up	1.51881	0.604431	1.20737	23594	Homo sapiens origin recognition complex, subunit 6 like (yeast) (ORC6L), mRNA.	GO:0006260|GO:0006260	GO:0005634|GO:0005654|GO:0005654|GO:0005654|GO:0005654|GO:0005654|GO:0005654|GO:0005654|GO:0005654|GO:0005664	GO:0003677|GO:0005515	chr16	45287477	45288898	GTGGTTGAAGCCCCAGCAAAGGAAATGGAGAAGGTAGAGGAGATGCCACA
RAB20	1240358	0.0147912	up	1.51972	0.191687	0.795491	55647	Homo sapiens RAB20, member RAS oncogene family (RAB20), mRNA.	GO:0007264|GO:0015031	GO:0005794	GO:0000166|GO:0005525	chr13	111175920	111175969	GGGGTCTGACCAGGCAAGCTGTGATCTGAAAGGAGCAAGGAACAGCAAGG
PLEKHA1	3930541	0.0449459	up	1.51998	-0.382653	0.221396	59338	Homo sapiens pleckstrin homology domain containing, family A (phosphoinositide binding specific) member 1 (PLEKHA1), transcript variant 1, mRNA.	GO:0008150	GO:0005575|GO:0005634|GO:0005737|GO:0005886	GO:0005543	chr10	124172520	124173712	GTAGACTTGGACGATGCGAGCCTTCCGGTCAGTGACGTGTGAGGCAGAAG
OKL38	4010086	0.0175699	up	1.52048	-1.541	-0.936471	29948	Homo sapiens pregnancy-induced growth inhibitor (OKL38), transcript variant 1, mRNA.				chr16	82557392	82557437	CTGCGCCTTCCAGAAGCAGGTCCCAAATAAAGCCAGTGCCCACCTGAAAA
TMEM178	6980689	0.0176314	up	1.52135	2.49642	3.10177	130733	Homo sapiens transmembrane protein 178 (TMEM178), mRNA.		GO:0005923|GO:0016020|GO:0016021	GO:0005198	chr2	39797960	39798009	GTCCAAGCACAAAGCGGTCTTTTACATTCCAACCTGTTGCCTGCCAGCCC
CDCA5	1400673	0.0238033	up	1.52143	0.262435	0.867861	113130	Homo sapiens cell division cycle associated 5 (CDCA5), mRNA.	GO:0000082|GO:0007049|GO:0007067|GO:0007076|GO:0007080|GO:0051301	GO:0005634|GO:0005737|GO:0008278	GO:0003682|GO:0005515	chr11	64601683	64601732	GCCTAGGTGTCCTTGAGCTGAACCGCACTGAAGAACTCTTGTCCTCACTG
ADCY1	580561	0.0456647	up	1.52236	2.4227	3.02902	107	Homo sapiens adenylate cyclase 1 (brain) (ADCY1), mRNA.	GO:0006171|GO:0009755	GO:0016020|GO:0016021	GO:0000287|GO:0005516|GO:0008294	chr7	45728797	45728846	GCGCCTGCGTTCTTCTGGGTTTGGCTAGATAGGGTTGTGTCCCTCTATGG
SLC16A10	7550192	0.0342127	up	1.52263	0.787886	1.39445	117247	Homo sapiens solute carrier family 16, member 10 (aromatic amino acid transporter) (SLC16A10), mRNA.	GO:0006810|GO:0015801|GO:0006810	GO:0005886|GO:0016021|GO:0016323|GO:0016021	GO:0005215|GO:0005215	chr6	111650814	111650863	CCCTTTGCGTTTGCAGTGCGTTTTACTCAAGTAGCCAGAAACACCCCACG
LOC400120	3440519	0.0258692	up	1.52309	1.91031	2.51731	400120	Homo sapiens hypothetical LOC400120 (LOC400120), mRNA.				chr13	36169230	36169279	ACGTCCCCAAACACCATAAGACCAGCACAGAGTTGCTGCCCTAAAATGTA
MTSS1	3170300	0.0492723	up	1.52331	4.32941	4.93662	9788	Homo sapiens metastasis suppressor 1 (MTSS1), mRNA.	GO:0006928|GO:0007155|GO:0007165|GO:0007169|GO:0007399|GO:0030036|GO:0045786|GO:0046847	GO:0001726|GO:0005737|GO:0015629|GO:0030139	GO:0003785|GO:0005102	chr8	125632315	125632364	TTGTGCTTTAGTTGCTAGTTTGTACTGAGAGTTGACCTCTCCCTGTGCAG
ANGPTL4	4610433	0.00768846	up	1.52334	-1.1845	-0.577263	51129	Homo sapiens angiopoietin-like 4 (ANGPTL4), transcript variant 1, mRNA.	GO:0001666|GO:0007165|GO:0007275|GO:0030154|GO:0043066|GO:0045766|GO:0051005|GO:0007165	GO:0005576|GO:0005578|GO:0005615|GO:0005634|GO:0005730|GO:0005737|GO:0005634|GO:0005730|GO:0005737	GO:0004857|GO:0005102|GO:0005102	chr19	8345182	8345231	GGGACACAAGCAGGCGCCAATGGTATCTGGGCGGAGCTCACAGAGTTCTT
KDELR3	3360053	0.00874808	up	1.52353	-4.69234	-4.08492	11015	Homo sapiens KDEL (Lys-Asp-Glu-Leu) endoplasmic reticulum protein retention receptor 3 (KDELR3), transcript variant 1, mRNA.	GO:0006621|GO:0015031|GO:0016192	GO:0005783|GO:0005789|GO:0016020|GO:0016021	GO:0004872|GO:0046923	chr22	37208995	37209044	CTGCCTTCAGGCCAGAAGCAAACCAAATTTACCAGGTTTGGCTGGAGGAG
CAPRIN2	6200682	0.00794934	up	1.5242	0.100363	0.708415	65981	Homo sapiens caprin family member 2 (CAPRIN2), transcript variant 2, mRNA.	GO:0030308	GO:0005737|GO:0005739		chr12	30863283	30863332	GGACAAGGAGACTCCCGTAGCATGACCCCTGTGGATGTGCCAGTGACAAA
COL12A1	3060095	0.0148252	up	1.5244	-6.50844	-5.90019	1303	Homo sapiens collagen, type XII, alpha 1 (COL12A1), transcript variant short, mRNA.	GO:0001501|GO:0007155|GO:0030199	GO:0005576|GO:0005578|GO:0005595	GO:0005198|GO:0005515|GO:0030020	chr6	75852960	75851774	GAGAGAACATGCCGTGTGCCTTTAGTTAGCACAGCGGGCAGCCTCAGTGA
CENPA	2600392	0.0419708	up	1.52482	0.0498179	0.658455	1058	Homo sapiens centromere protein A (CENPA), transcript variant 2, mRNA.	GO:0006334|GO:0006334|GO:0044419	GO:0000786|GO:0005634|GO:0005694|GO:0000775|GO:0000786|GO:0000939|GO:0005634|GO:0005694	GO:0003677|GO:0003677|GO:0003682	chr2	26870611	26870660	GGCTGGGCATTTCCATCATATAGACCTCTGCCCTTCAGAGTAGCCTCACC
LOC652377	4180091	0.0329786	up	1.52493	2.24027	2.84901	652377	PREDICTED: Homo sapiens similar to C1q and tumor necrosis factor related protein 4 (LOC652377), mRNA.							TACGGCGCCTACAGCAACCACGGCAAGTACATCACCTTCTCCGGCTTCCT
FEN1	1010719	0.0131002	up	1.52575	0.260248	0.869768	2237	Homo sapiens flap structure-specific endonuclease 1 (FEN1), mRNA.	GO:0006260|GO:0006302|GO:0009650|GO:0048015	GO:0005634	GO:0000287|GO:0003684|GO:0003690|GO:0004519|GO:0004523|GO:0005515|GO:0005515|GO:0008309|GO:0008409|GO:0016787|GO:0017108|GO:0017108|GO:0030145	chr11	61320359	61320408	CTGAGGAGCGAATCCGCAGTGGGGTCAAGAGGCTGAGTAAGAGCCGCCAA
DHCR7	6550048	0.0468072	up	1.52716	0.887239	1.49809	1717	Homo sapiens 7-dehydrocholesterol reductase (DHCR7), mRNA.	GO:0001568|GO:0006695|GO:0009791|GO:0030154|GO:0030324|GO:0035264|GO:0042127|GO:0055114	GO:0005640|GO:0005783|GO:0005789|GO:0005789|GO:0016020|GO:0016021	GO:0005515|GO:0016491|GO:0047598|GO:0047598	chr11	70823473	70823522	AAAGGGGCTTTCATGTCGTTTCCTTCCTGCTCCTGCTGCACAGCTGCCAG
H1F0	630278	0.0284447	up	1.5274	-3.69562	-3.08454	3005	Homo sapiens H1 histone family, member 0 (H1F0), mRNA.	GO:0006334	GO:0000786|GO:0005634|GO:0005694|GO:0005794|GO:0005856	GO:0003677	chr22	36533168	36533217	TCTAGGGCTAGTACTTAGTTTCACACCCGGGAGCTGGGAGAAAAAACCTG
PRRT2	6350112	0.027416	up	1.52789	1.97343	2.58498	112476	Homo sapiens proline-rich transmembrane protein 2 (PRRT2), mRNA.	GO:0009607	GO:0016020|GO:0016021		chr16	29734492	29734541	AGGAGGCGGGGACCGAGCTACAACGCGGTTCGGATTTGGCGGGGGTTTTT
DYNC1I1	3520762	0.0158294	up	1.52794	-0.12561	0.485977	1780	Homo sapiens dynein, cytoplasmic 1, intermediate chain 1 (DYNC1I1), mRNA.	GO:0047496	GO:0005868|GO:0005874|GO:0048471	GO:0003777|GO:0005515|GO:0008017	chr7	95565236	95565285	GGTACAGGGCCAAAGACTTGAGACGTGGTGTTTTACATGGTGACTCACAT
TRIO	5340576	0.0240681	up	1.52812	-0.739156	-0.127398	7204	Homo sapiens triple functional domain (PTPRF interacting) (TRIO), mRNA.	GO:0006468|GO:0007185|GO:0035023	GO:0005622|GO:0005737	GO:0000166|GO:0004674|GO:0005085|GO:0005089|GO:0005524|GO:0016740	chr5	14459059	14459690	CCTCCCCCTGTTCCTGCCCCAAGCCGTCAATCAGATTGTGGAGCAGTACA
AURKA	4730605	0.00874808	up	1.52835	-0.311246	0.300733	6790	Homo sapiens aurora kinase A (AURKA), transcript variant 5, mRNA.	GO:0000278|GO:0006468|GO:0007051|GO:0007067|GO:0031647|GO:0048015|GO:0006468|GO:0000278|GO:0006468|GO:0000278|GO:0000278|GO:0000278|GO:0006468|GO:0000278|GO:0006468	GO:0005634|GO:0005813|GO:0005819	GO:0000166|GO:0004674|GO:0005515|GO:0005515|GO:0005515|GO:0005524|GO:0016740|GO:0031625|GO:0000166|GO:0004674|GO:0005524|GO:0016740|GO:0000166|GO:0004672|GO:0005524|GO:0031625|GO:0016301|GO:0031625|GO:0016301|GO:0031625|GO:0004672|GO:0005524|GO:0031625|GO:0000166|GO:0004674|GO:0005524|GO:0016740|GO:0031625	chr20	54944638	54944687	GAATGCTGTGTGTCTGTCCGGCACCCCGGTAGGCCTGATTGGGTTTCTAG
HELLS	7040161	0.0349532	up	1.52971	0.247133	0.860392	3070	Homo sapiens helicase, lymphoid-specific (HELLS), mRNA.	GO:0006346|GO:0006350|GO:0006355|GO:0007049|GO:0007067|GO:0007275|GO:0010216|GO:0031508|GO:0046651|GO:0051301	GO:0005634|GO:0005721	GO:0000166|GO:0003677|GO:0004386|GO:0005524|GO:0016787|GO:0003677|GO:0004386|GO:0005524	chr10	96340288	96340422	CAGGCTGATGTGTACTTAACCACTTCCAGATTTATACAGTCTTCCTGTGG
WDR51A	6660446	0.0164316	up	1.52992	-0.130764	0.48269	25886	Homo sapiens WD repeat domain 51A (WDR51A), mRNA.				chr3	52084332	52084381	CACTGGAGCCAGGTGACTTCCTCCTTGCGTGAGTGAGGGCACAGGAATCT
DSCC1	3890372	0.0323483	up	1.53005	-0.112332	0.501243	79075	Homo sapiens defective in sister chromatid cohesion 1 homolog (S. cerevisiae) (DSCC1), mRNA.	GO:0006260|GO:0007049	GO:0005634	GO:0003677	chr8	120915532	120915581	CTCATCACCAGGACAGTTGGAGGGGGTAGGCCGAGGTTAAATGGTCCACG
EPHA2	6510332	0.0153913	up	1.53086	-0.281073	0.333269	1969	Homo sapiens EPH receptor A2 (EPHA2), mRNA.	GO:0006468|GO:0030182|GO:0048013|GO:0006468|GO:0007165|GO:0007275|GO:0030182|GO:0048013	GO:0016020|GO:0016021|GO:0005887|GO:0016020	GO:0000166|GO:0004872|GO:0005003|GO:0005524|GO:0016740|GO:0000166|GO:0004872|GO:0005003|GO:0005524|GO:0016740	chr1	16451294	16451343	GGCCCAGCGCCAAGTAAACAGGGTACCTCAAGCCCCATTTCCTCACACTA
CLPTM1L	1050750	0.0310588	up	1.53116	-0.64321	-0.0285867	81037	Homo sapiens CLPTM1-like (CLPTM1L), mRNA.	GO:0006915	GO:0016020|GO:0016021		chr5	1371250	1371299	CACGTGTGAACATCTGTCTTGGTCACAGAGCTGGGTGCTGCCGGTCACCT
PSD2	3360386	0.0147912	up	1.53179	2.49833	3.11355	84249	Homo sapiens pleckstrin and Sec7 domain containing 2 (PSD2), mRNA.	GO:0032012	GO:0005622|GO:0016020|GO:0016021|GO:0030425|GO:0043025	GO:0005086	chr5	139202510	139202559	ACTTTCCCCATGCTGCCTCAAAAGTTCTGTGAGTTTCGGGGTCAGTGTCC
NRG1	1940128	0.0225908	up	1.53232	-0.207733	0.407984	3084	Homo sapiens neuregulin 1 (NRG1), transcript variant GGF2, mRNA.	GO:0009790|GO:0009790|GO:0006916|GO:0007154|GO:0007169|GO:0007171|GO:0007219|GO:0007399|GO:0008283|GO:0009790|GO:0014032|GO:0016481|GO:0030307|GO:0030879|GO:0042060|GO:0042060|GO:0043496|GO:0043497|GO:0043624|GO:0045785|GO:0051048|GO:0051155|GO:0055007|GO:0055012|GO:0060045|GO:0007399|GO:0030307	GO:0005576|GO:0005576|GO:0005576|GO:0005615|GO:0005615|GO:0005634|GO:0005886|GO:0016021|GO:0016324|GO:0016020|GO:0016021	GO:0005102|GO:0005102|GO:0003712|GO:0008083|GO:0008083|GO:0030296|GO:0030297|GO:0030297|GO:0030297|GO:0030971|GO:0030971|GO:0043125|GO:0043125|GO:0003674|GO:0005125|GO:0008083	chr8	31617116	31617165	CTACATCCACCACTGGGACAAGCCATCTTGTAAAATGTGCGGAGAAGGAG
STMN1	3460707	0.0379059	up	1.53247	1.97076	2.58661	3925	Homo sapiens stathmin 1 (STMN1), transcript variant 1, mRNA.	GO:0007242|GO:0007242|GO:0007409|GO:0031115|GO:0051272|GO:0007019|GO:0007052|GO:0007242|GO:0007275|GO:0007399|GO:0030154	GO:0005737|GO:0005622|GO:0005737|GO:0005874	GO:0005515|GO:0004871|GO:0004871|GO:0005515|GO:0015631	chr1	26226891	26226940	CCGCACGTTCTCTGCCCCGTTTCTTGCCCCAGTGTGGTTTGCATTGTCTC
MSRB3	4290088	0.0248599	up	1.53396	-3.37824	-2.76098	253827	Homo sapiens methionine sulfoxide reductase B3 (MSRB3), transcript variant 1, mRNA.				chr12	64146501	64146550	GGAAGTGCATGGGACTTTCCCTCTCTGCACTCCAGCTCTTACTGTACCAT
CA10	3840687	0.0256201	up	1.53478	0.341479	0.959508	56934	Homo sapiens carbonic anhydrase X (CA10), mRNA.	GO:0006730|GO:0007420|GO:0006730	GO:0005575	GO:0003674|GO:0004089|GO:0008270|GO:0004089|GO:0008270	chr17	47062851	47062900	GCAGGCGACAGACTTCTTGCGTTTCAAGACTGCCATGCCCCCCTGTGATG
COL5A2	4490292	0.0336154	up	1.53585	-1.49082	-0.871782	1290	Homo sapiens collagen, type V, alpha 2 (COL5A2), mRNA.	GO:0030199|GO:0043588	GO:0005581|GO:0005576|GO:0005581|GO:0005588	GO:0005201|GO:0005201	chr2	189897455	189897504	GAGCATCGTTCCAATGCTTGTTCACTGTTCCTCTGTCATACTGTATCTGG
PODXL	6330576	0.0282029	up	1.53653	0.439804	1.05948	5420	Homo sapiens podocalyxin-like (PODXL), transcript variant 1, mRNA.	GO:0050900	GO:0005886|GO:0005887|GO:0016020		chr7	131185324	131185373	GGACTGAGGGACCAAGGAAACATGATGGGGGAGGCAGAGAGGGCAAGAGT
BMP7	3170100	0.018995	up	1.53663	4.33252	4.95229	655	Homo sapiens bone morphogenetic protein 7 (osteogenic protein 1) (BMP7), mRNA.	GO:0040007|GO:0040007|GO:0040007|GO:0001503|GO:0001707|GO:0001822|GO:0001837|GO:0007389|GO:0007411|GO:0007435|GO:0009887|GO:0030501|GO:0030509|GO:0040007|GO:0042475|GO:0045669|GO:0045786|GO:0045941|GO:0048468|GO:0048593|GO:0048754|GO:0051216	GO:0005576|GO:0005576|GO:0005576|GO:0005576|GO:0005615	GO:0008083|GO:0008083|GO:0008083|GO:0005125|GO:0005515|GO:0005515|GO:0008083	chr20	55179001	55179050	TGGCAAGGGGTGGGCACATTGGTGTCTGTGCGAAAGGAAAATTGACCCGG
MAD2L1	870546	0.0449012	up	1.53741	-0.0400267	0.580479	4085	Homo sapiens MAD2 mitotic arrest deficient-like 1 (yeast) (MAD2L1), mRNA.	GO:0007067|GO:0000070|GO:0007049|GO:0007094|GO:0031145|GO:0051301|GO:0051436	GO:0000776|GO:0005634|GO:0005816|GO:0005829|GO:0005829|GO:0005829|GO:0005829|GO:0005829|GO:0005829	GO:0005515|GO:0005515|GO:0005515|GO:0005515	chr4	121200789	121200838	GGGAAGAGTCGGGACCACAGTTTATTACCAATTCTGAGGAAGTCCGCCTT
FLJ44342	4180554	0.0449315	up	1.53904	0.107224	0.729252	645460	PREDICTED: Homo sapiens hypothetical LOC645460 (FLJ44342), miscRNA.				chr17	53421600	53421649	GCTTGTCTCTGATATTCCCAGTAGCTTCCCTCTGTGTGAGGAAAGGATAG
SORBS2	2000630	0.0358045	up	1.54013	5.59376	6.21681	8470	Homo sapiens sorbin and SH3 domain containing 2 (SORBS2), transcript variant 1, mRNA.	GO:0008150	GO:0005622|GO:0005634|GO:0005737|GO:0015629|GO:0030018	GO:0005200|GO:0005515|GO:0008093|GO:0008270|GO:0008307	chr4	186744115	186744164	GCAGACTAGCCTCTCCTTATCTCACAGATCACAAGCACCCCTAGATAGTG
NEXN	2750187	0.0179904	up	1.54393	-3.244	-2.61739	91624	Homo sapiens nexilin (F actin binding protein) (NEXN), mRNA.	GO:0030334|GO:0051493	GO:0005737|GO:0005856|GO:0005924|GO:0030054	GO:0051015	chr1	78181249	78181298	TCTGTGGCGGGGCCAAAAAAGGAAACCAGGAGTGCCACTATGCTGACTTC
NOL12	2060064	0.0160891	up	1.54508	-0.785242	-0.157563	79159	Homo sapiens nucleolar protein 12 (NOL12), mRNA.		GO:0005634|GO:0005730	GO:0019843	chr22	36419258	36419307	CTTACCAAAGTGCCTGTTGCTCTCCAGGTGTGCCTACCGCATGTTGCCGC
SVOP	4290176	0.0153913	up	1.54638	1.46915	2.09805	55530	Homo sapiens SV2 related protein homolog (rat) (SVOP), mRNA.	GO:0006811	GO:0008021|GO:0016020|GO:0016021|GO:0030054|GO:0031410|GO:0045202	GO:0005215|GO:0015075	chr12	107855211	107856749	TCAAAGGAAGCAGTGGGAGGCCAGTTGGTTTTGAGTTGGTCTCCGCAGGC
C13orf36	1170402	0.0326297	up	1.54704	1.97287	2.60237	400120	Homo sapiens chromosome 13 open reading frame 36 (C13orf36), mRNA.		GO:0016020|GO:0016021		chr13	36169231	36169280	CGTCCCCAAACACCATAAGACCAGCACAGAGTTGCTGCCCTAAAATGTAT
MTSS1	1510121	0.0399454	up	1.54927	3.42268	4.05427	9788	Homo sapiens metastasis suppressor 1 (MTSS1), mRNA.	GO:0006928|GO:0007155|GO:0007165|GO:0007169|GO:0007399|GO:0030036|GO:0045786|GO:0046847	GO:0001726|GO:0005737|GO:0015629|GO:0030139	GO:0003785|GO:0005102	chr8	125633709	125633758	TAACAGGGCACATTTCTGACCGAACCCTCTCAAGGCAGAGGAGGAGTTTG
ACTA2	6480059	0.0096955	up	1.54959	-2.01088	-1.37899	59	Homo sapiens actin, alpha 2, smooth muscle, aorta (ACTA2), mRNA.		GO:0005856|GO:0005737|GO:0005856	GO:0005515|GO:0000166|GO:0005198|GO:0005515|GO:0005524|GO:0000166|GO:0005198|GO:0005515|GO:0005524	chr10	90684907	90684956	CACTTTCCTGCTCCTCTCTGTCTCTAGCACACAACTGTGAATGTCCTGTG
PLK4	3190470	0.0224601	up	1.55091	0.485641	1.11876	10733	Homo sapiens polo-like kinase 4 (Drosophila) (PLK4), mRNA.	GO:0006468		GO:0000166|GO:0004674|GO:0004713|GO:0005515|GO:0005524|GO:0016740	chr4	128817992	128818041	GGGTCCCAGTTGGTTGTGCAGGCAGGAGTGTCTTCTATCAGTTATACCTC
PI4K2A	4180376	0.0451451	up	1.55138	-1.08886	-0.455302	55361	Homo sapiens phosphatidylinositol 4-kinase type 2 alpha (PI4K2A), mRNA.	GO:0006661	GO:0005737|GO:0005887|GO:0016020|GO:0045121	GO:0000287|GO:0004430|GO:0005515|GO:0016301|GO:0016740	chr10	99424852	99424901	AGACGTGGCTCCTGGGGCTATTTCTCCCTAATAAAGGATGATCCAGGTCC
SLC12A8	3710075	0.0131217	up	1.55198	-0.390636	0.243478	84561	Homo sapiens solute carrier family 12 (potassium/chloride transporters), member 8 (SLC12A8), mRNA.	GO:0006811|GO:0006813|GO:0007276	GO:0005634|GO:0016020|GO:0016021	GO:0015293|GO:0030955|GO:0031404	chr3	126284780	126284829	CAGGTACTAAGACTAGCAGGGGACACCAAGACTCTGCACAACCAGATTGC
DTL	5570296	0.0263414	up	1.5526	0.142659	0.777342	51514	Homo sapiens denticleless homolog (Drosophila) (DTL), mRNA.	GO:0006260|GO:0006511|GO:0006974	GO:0005634|GO:0005737|GO:0016020|GO:0031965	GO:0005515	chr1	210344381	210344430	GGAAGCCATAGAATTGCTCTGGTCAAAACCAAGCACACCATAGCCTTAAC
AURKA	5420309	0.0222776	up	1.55318	-0.340616	0.294609	6790	Homo sapiens aurora kinase A (AURKA), transcript variant 3, mRNA.	GO:0000278|GO:0006468|GO:0007051|GO:0007067|GO:0031647|GO:0048015|GO:0006468|GO:0000278|GO:0006468|GO:0000278|GO:0000278|GO:0000278|GO:0006468|GO:0000278|GO:0006468	GO:0005634|GO:0005813|GO:0005819	GO:0000166|GO:0004674|GO:0005515|GO:0005515|GO:0005515|GO:0005524|GO:0016740|GO:0031625|GO:0000166|GO:0004674|GO:0005524|GO:0016740|GO:0000166|GO:0004672|GO:0005524|GO:0031625|GO:0016301|GO:0031625|GO:0016301|GO:0031625|GO:0004672|GO:0005524|GO:0031625|GO:0000166|GO:0004674|GO:0005524|GO:0016740|GO:0031625	chr20	54944646	54944695	TCCTTTAGGAATGCTGTGTGTCTGTCCGGCACCCCGGTAGGCCTGATTGG
CPNE4	2120064	0.0498347	up	1.55446	2.30862	2.94504	131034	Homo sapiens copine IV (CPNE4), mRNA.				chr3	132736522	132736571	GCATGTGTAGCCCTGAGGCCTGGATCTGTTAAGCCCTTGTATTGTTAACT
PFKFB3	4120053	0.0288371	up	1.55548	-0.552365	0.0849988	5209	Homo sapiens 6-phosphofructo-2-kinase/fructose-2,6-biphosphatase 3 (PFKFB3), mRNA.	GO:0006003|GO:0008152|GO:0006003|GO:0006003|GO:0008152|GO:0006003|GO:0008152|GO:0006003|GO:0006003|GO:0006003|GO:0008152	GO:0005575|GO:0005829	GO:0003824|GO:0003873|GO:0005524|GO:0016301|GO:0003824|GO:0005524|GO:0016301|GO:0003824|GO:0003873|GO:0005524|GO:0016301|GO:0003824|GO:0003873|GO:0005524|GO:0016301|GO:0003873|GO:0005524|GO:0016301|GO:0016740|GO:0003873|GO:0016301|GO:0016740|GO:0003873|GO:0005524|GO:0016301|GO:0016740|GO:0000166|GO:0003873|GO:0003873|GO:0004331|GO:0005524|GO:0016301|GO:0016740|GO:0016787|GO:0042802	chr10	6317109	6317158	TGGGTGAGTTTCCCCCCTCCTTATTCTGTCCTGAGACCACGGGCAAAGCT
RFC3	3890309	0.00768846	up	1.55618	0.384984	1.02299	5983	Homo sapiens replication factor C (activator 1) 3, 38kDa (RFC3), transcript variant 1, mRNA.	GO:0006260|GO:0000731|GO:0006271|GO:0006297	GO:0005634|GO:0005634|GO:0005654|GO:0005663|GO:0005663	GO:0000166|GO:0003677|GO:0005524|GO:0017111|GO:0000166|GO:0003689|GO:0005515|GO:0016887	chr13	33309319	33309368	GCCGTCACCCCAAAAAGTTCCCTCCATATCCCTTTGCAGTCAGTTCATCC
SLIT2	4560592	0.0407686	up	1.55646	-0.502707	0.13556	9353	Homo sapiens slit homolog 2 (Drosophila) (SLIT2), mRNA.	GO:0001657|GO:0006935|GO:0007186|GO:0007275|GO:0007399|GO:0007509|GO:0007608|GO:0008038|GO:0008045|GO:0008347|GO:0030154|GO:0031290|GO:0050772|GO:0050929|GO:0050929	GO:0005576|GO:0005615|GO:0016021	GO:0004963|GO:0005102|GO:0005509	chr4	20229660	20229709	CTGACGGCTCCTCCTTTGTGGACGAGGTTGAGAAAGTGGTGAAGTGCGGC
CCND2	3460520	0.0358629	up	1.5567	5.56397	6.20246	894	Homo sapiens cyclin D2 (CCND2), mRNA.	GO:0001934|GO:0045737|GO:0051301|GO:0051726	GO:0000307|GO:0005634	GO:0005515|GO:0019901	chr12	4284480	4284529	CTCTCACAGTGTACTCTATAAGAGGTGTGGGTGTCTGTTTGGTCAGGATG
B3GAT1	6370014	0.02354	up	1.55822	3.5939	4.2338	27087	Homo sapiens beta-1,3-glucuronyltransferase 1 (glucuronosyltransferase P) (B3GAT1), transcript variant 1, mRNA.	GO:0005975	GO:0000139|GO:0005794|GO:0016020|GO:0016021	GO:0008499|GO:0015018|GO:0016740|GO:0030145|GO:0046872	chr11	134248965	134249014	CCCTGAGCCACCTTGCAGGACGTTTTCCCCAACCTCTTACACCCTGGATG
C17orf91	5290161	0.0145045	up	1.55827	-3.47318	-2.83323	84981	Homo sapiens chromosome 17 open reading frame 91 (C17orf91), transcript variant 2, mRNA.				chr17	1561813	1561862	CTCCATCCAGATGGTGGAGTACCGCGCAGACATTAAAAGTCATGTAAAAG
CCDC21	5310348	0.0236667	up	1.55842	0.401523	1.04161	64793	Homo sapiens coiled-coil domain containing 21 (CCDC21), mRNA.				chr1	26477712	26477761	TGCTTAAAGGCAGAGCCGCCTGGTTGGTCTCCACCCTGTGCATTGGGAGC
SEZ6L2	1090521	0.039061	up	1.55876	0.804491	1.44489	26470	Homo sapiens seizure related 6 homolog (mouse)-like 2 (SEZ6L2), transcript variant 2, mRNA.		GO:0005783|GO:0005789|GO:0005886|GO:0016021		chr16	29790482	29790531	AGTTTCCATCTGAACCCCAAGACTACAGCTGCAGGACCCAGGACGCCCCT
DUT	6330494	0.0178276	up	1.5599	0.431747	1.0732	1854	Homo sapiens deoxyuridine triphosphatase (DUT), nuclear gene encoding mitochondrial protein, transcript variant 3, mRNA.	GO:0046080|GO:0006139|GO:0006260|GO:0009117|GO:0046080	GO:0005739|GO:0005634|GO:0005739|GO:0005739|GO:0005829	GO:0004170|GO:0016787|GO:0000287|GO:0004170|GO:0004170|GO:0016787	chr15	46422615	46422664	GGAGTGCTTCTGGAACTATCAGCCCACTTGACCACCCAGTTTGTGGAAGC
UBC	6020195	0.021388	up	1.56016	0.2633	0.904993	7316	Homo sapiens ubiquitin C (UBC), mRNA.	GO:0006464|GO:0006464		GO:0005515	chr12	123965216	123965265	TCCAGAGAGCGGAACAGGCGAGGAAAAGTAGTCCCTTCTCGGCGATTCTG
KDELR3	540129	0.0100785	up	1.56182	-4.71483	-4.0716	11015	Homo sapiens KDEL (Lys-Asp-Glu-Leu) endoplasmic reticulum protein retention receptor 3 (KDELR3), transcript variant 2, mRNA.	GO:0006621|GO:0015031|GO:0016192	GO:0005783|GO:0005789|GO:0016020|GO:0016021	GO:0004872|GO:0046923	chr22	37207271	37207320	TTTCTGGGTCTGTACCGGGCACTCTACCTGGCTAACTGGATCAGGCGGTA
DAB2	610152	0.0197851	up	1.56251	-6.19875	-5.55488	1601	Homo sapiens disabled homolog 2, mitogen-responsive phosphoprotein (Drosophila) (DAB2), mRNA.	GO:0000904|GO:0001701|GO:0006898|GO:0006907|GO:0007588|GO:0008283	GO:0005905|GO:0016020|GO:0031410	GO:0008022	chr5	39411864	39411913	GAACACCTGCCTTCTACCCTCTGGTTGGGAGATGCAGCCACCACATCCCT
PCDH19	7150397	0.0272007	up	1.56354	3.78376	4.42857	57526	Homo sapiens protocadherin 19 (PCDH19), mRNA.	GO:0007155|GO:0007156	GO:0005886|GO:0016021	GO:0005509|GO:0005515	chrX	99433663	99433712	GGCTTACGCCTTCGCTCCTCTAGTGAGGGGAATGAGCCTGATGACACTAT
NELL1	1990731	0.0379275	up	1.564	3.9338	4.57904	4745	Homo sapiens NEL-like 1 (chicken) (NELL1), mRNA.	GO:0007155|GO:0007399|GO:0007155	GO:0005576	GO:0005198|GO:0005509|GO:0005198|GO:0005509	chr11	21553272	21553321	TCCACCTGAGGACGGTGTTTGGAGGTTGCCTTTTGGACCTACCACTTTGC
SERTAD1	4290072	0.04215	up	1.56404	-1.51711	-0.871839	29950	Homo sapiens SERTA domain containing 1 (SERTAD1), mRNA.	GO:0000079|GO:0006355|GO:0008284|GO:0045941		GO:0005515|GO:0016563	chr19	45620407	45620456	GAATCTAGTCCTGGGCAACTTCACATCCGTCCTCCTGTCTCAGGGCTGGC
NCAPG	1450280	0.0381179	up	1.56435	-0.569379	0.0761827	64151	Homo sapiens non-SMC condensin I complex, subunit G (NCAPG), mRNA.	GO:0007049|GO:0007067|GO:0007076|GO:0051301	GO:0005634|GO:0005737	GO:0005515	chr4	17453041	17453090	AGTGACAGTTTCAGCTAGGACGAACAGGAGGTGTCAGACTGCTGAAGCCG
SPRY1	6760669	0.0153913	up	1.5667	1.73771	2.38544	10252	Homo sapiens sprouty homolog 1, antagonist of FGF signaling (Drosophila) (SPRY1), transcript variant 1, mRNA.	GO:0001657|GO:0001759|GO:0007275|GO:0009966|GO:0043407	GO:0005737|GO:0005829|GO:0005886|GO:0030027	GO:0005515	chr4	124324538	124324587	ACTATGCTGCCTAAAGTGATCTTGGCTCCTTAATGGTCCTTTTGGCCCCT
KIF23	4120278	0.0117786	up	1.56671	-0.992705	-0.344966	9493	Homo sapiens kinesin family member 23 (KIF23), transcript variant 2, mRNA.	GO:0007018|GO:0000022|GO:0007018|GO:0007049|GO:0007067|GO:0051301	GO:0005874|GO:0005875|GO:0005634|GO:0005654|GO:0005819|GO:0005871|GO:0005874	GO:0000166|GO:0003777|GO:0005524|GO:0000166|GO:0003777|GO:0005515|GO:0005515|GO:0005515|GO:0005524	chr15	67526297	67527196	CAGCTGGGACCTGGATATCAGCATCACGCACAACCCAAGCGCAAAAAGCC
POLQ	4060056	0.0109796	up	1.56862	-0.197318	0.452174	10721	Homo sapiens polymerase (DNA directed), theta (POLQ), mRNA.	GO:0006260|GO:0006281|GO:0006260|GO:0006281	GO:0005654	GO:0000166|GO:0003684|GO:0003887|GO:0005524|GO:0016740|GO:0016779|GO:0003677|GO:0003887|GO:0005524|GO:0008026|GO:0016787	chr3	122633049	122633098	CAGTCCCTTAGTGCCTCTTTCTGTTTGTGGCATGGTGAGAAAACCCATGC
ACTN1	5080364	0.0449459	up	1.56962	-2.84548	-2.19507	87	Homo sapiens actinin, alpha 1 (ACTN1), mRNA.	GO:0042981|GO:0048041|GO:0051017|GO:0051271	GO:0005730|GO:0005856|GO:0005730|GO:0005737|GO:0005856|GO:0005925|GO:0030018|GO:0031143	GO:0003779|GO:0005509|GO:0005178|GO:0005509|GO:0005515|GO:0017166|GO:0051015	chr14	68411162	68411211	GGCCCACGTGGCATCGATCCTCCCTGCCCGCGAAGTGACAGTTTACAAAA
C8orf13	4010184	0.0284447	up	1.57005	-0.561107	0.0897025	83648	Homo sapiens chromosome 8 open reading frame 13 (C8orf13), mRNA.				chr8	11316511	11316560	GGCTTGACGATGCCTGACCGAGTTCAAGACCCACACCCTGTAGCAATACC
CALD1	4230328	0.026153	up	1.57212	-3.32164	-2.66894	800	Homo sapiens caldesmon 1 (CALD1), transcript variant 3, mRNA.	GO:0006928|GO:0006936	GO:0005856	GO:0003779|GO:0005516|GO:0005523|GO:0017022	chr7	134300622	134300671	GCAAGCGGAACCTCTGGGAAAAGCAATCTGTGGATAAGGTCACTTCCCCC
CSRNP2	1940326	0.0395648	up	1.5726	1.28366	1.93681	81566	Homo sapiens cysteine-serine-rich nuclear protein 2 (CSRNP2), mRNA.	GO:0006350|GO:0006355|GO:0006915|GO:0045944	GO:0005634	GO:0003700	chr12	51455555	51455604	GGGTGAGGTTTGCCCACTGTCTCTGCAGGAAGGCTCCGGCTTAATCTAGG
ADCY6	2190463	0.0164316	up	1.57294	0.695258	1.34872	112	Homo sapiens adenylate cyclase 6 (ADCY6), transcript variant 2, mRNA.	GO:0006171|GO:0007242	GO:0016020|GO:0016021	GO:0000287|GO:0004016	chr12	49160428	49160477	GTGGAGGCCTGGTTTCTGGGTAATGCCTCCCTTGGGCATCTTCATGCATC
SERPINE1	770408	0.0031005	up	1.57325	-5.64035	-4.9866	5054	Homo sapiens serpin peptidase inhibitor, clade E (nexin, plasminogen activator inhibitor type 1), member 1 (SERPINE1), mRNA.	GO:0007596|GO:0042730|GO:0045765	GO:0005576|GO:0005576|GO:0005576|GO:0005886	GO:0002020|GO:0004252|GO:0004867|GO:0004867|GO:0004867|GO:0005515|GO:0005515	chr7	100568583	100568632	GGAGCAGAAATGCAAGGGGCTGCATGACCTACCAGGACAGAACTTTCCCC
SERPINI1	3440156	0.0443629	up	1.57403	1.19684	1.85131	5274	Homo sapiens serpin peptidase inhibitor, clade I (neuroserpin), member 1 (SERPINI1), mRNA.				chr3	168995187	168995236	GCTGGTGCTGTCCAGACAGGAAGTTCCTCTTGCTACTCTGGAGCCATTAG
CENPE	6100564	0.0107609	up	1.57616	-0.2795	0.376913	1062	Homo sapiens centromere protein E, 312kDa (CENPE), mRNA.	GO:0000089|GO:0007018|GO:0007049|GO:0007079|GO:0007080|GO:0051301|GO:0051382	GO:0000775|GO:0000940|GO:0005634|GO:0005819|GO:0005874|GO:0005875	GO:0000166|GO:0003777|GO:0005515|GO:0005524|GO:0043515	chr4	104246876	104249411	CCAGAGGTGCAAAATGCAGGAGCAGAGAGTGTGGATTCTCAGCCAGGTCC
HMMR	4060064	0.0157108	up	1.58065	-0.876178	-0.215659	3161	Homo sapiens hyaluronan-mediated motility receptor (RHAMM) (HMMR), transcript variant 2, mRNA.		GO:0005737|GO:0009986	GO:0005540|GO:0004872	chr5	162851071	162851120	CCCCAGATTCTTCAGCTTGATCCTGGAGGTCTTTTCTAGTCTGAGCTTCT
LY6G5C	3520647	0.0489844	up	1.58072	1.24238	1.90297	80741	Homo sapiens lymphocyte antigen 6 complex, locus G5C (LY6G5C), mRNA.		GO:0005576		chr6	31752515	31752564	CTTGGTTGACGCCCTTCAGCACACTTACTGCTACTCTGTACCCCCAGCCC
EGFLAM	3800142	0.0114832	up	1.5836	-0.188835	0.474371	133584	Homo sapiens EGF-like, fibronectin type III and laminin G domains (EGFLAM), transcript variant 3, mRNA.		GO:0005576		chr5	38448473	38448417	GAGAGGGCTCGTGGGCTGTATCTCTCACTTCACCCTGTCCACCGATTACC
CDCA8	4830634	0.0349729	up	1.5836	0.0245136	0.687725	55143	Homo sapiens cell division cycle associated 8 (CDCA8), mRNA.	GO:0007049|GO:0007067|GO:0051301	GO:0000775|GO:0005634|GO:0005694|GO:0005737|GO:0043234	GO:0005515|GO:0005515	chr1	37947578	37947627	TGTGACTTGCTTGGTGGCCTCATTCCATGTGTGCCTGTGCCTGGGGCATG
CALM1	1660477	0.0473255	up	1.58474	0.891345	1.5556	801	Homo sapiens calmodulin 1 (phosphorylase kinase, delta) (CALM1), mRNA.	GO:0007049|GO:0007186|GO:0032465|GO:0043388	GO:0000922|GO:0005737|GO:0005813|GO:0005829|GO:0005829|GO:0005829|GO:0005876|GO:0005886	GO:0005509|GO:0005509|GO:0019904|GO:0031997	chr14	89944051	89944100	TGCTGTCTGTATCCCTTGGAGTAAGAAGGTAGTGGCATGGGTGGAGTGTG
TRIB2	2570328	0.0371207	up	1.58695	2.20936	2.87561	28951	Homo sapiens tribbles homolog 2 (Drosophila) (TRIB2), mRNA.	GO:0006468|GO:0043405|GO:0006468	GO:0005634|GO:0005730|GO:0005737|GO:0005856	GO:0000166|GO:0004672|GO:0004860|GO:0005515|GO:0005524|GO:0004672|GO:0005515|GO:0005524	chr2	12800000	12800049	GTCCTCACGTTCCCAGGAGGGCGGCTTCACCCTTCGTAACCAGGAGACAA
NPY5R	6180669	0.0061183	up	1.58765	0.691545	1.35843	4889	Homo sapiens neuropeptide Y receptor Y5 (NPY5R), mRNA.	GO:0007165|GO:0007186|GO:0007268	GO:0005886|GO:0005887	GO:0001601|GO:0001602|GO:0004872	chr4	164272384	164272433	GAAGTCAGCTCTCTTCATCCAGTAAGTTCATACCAGGGGTCCCCACTTGC
SLC20A1	6420731	0.01795	up	1.58767	-0.898119	-0.23121	6574	Homo sapiens solute carrier family 20 (phosphate transporter), member 1 (SLC20A1), mRNA.	GO:0006796|GO:0006810|GO:0006817|GO:0043123	GO:0005887|GO:0016020	GO:0004872|GO:0005315|GO:0005436|GO:0015293	chr2	113137447	113137496	CATGCTCTGCGTTGTTGGTTTCACCAGCTTCTGCCCTCACATGCACAGGG
INPP1	6660315	0.0296975	up	1.58767	-1.53079	-0.863878	3628	Homo sapiens inositol polyphosphate-1-phosphatase (INPP1), mRNA.	GO:0006796|GO:0007165		GO:0000287|GO:0004437|GO:0004441|GO:0016787|GO:0031403	chr2	190944320	190944369	GCCTCCTGGTCCAAAACCTGGCACCTGCAGAGACGCATACCTAGAGGAAC
ALK	6250431	0.0323483	up	1.58811	0.981548	1.64886	238	Homo sapiens anaplastic lymphoma receptor tyrosine kinase (ALK), mRNA.	GO:0006468|GO:0006487|GO:0007169|GO:0007399|GO:0007420	GO:0005887|GO:0016020	GO:0000166|GO:0004714|GO:0004716|GO:0004872|GO:0005515|GO:0005524|GO:0016740	chr2	29448397	29449802	GCCTTGTTGATGTGGACATGAGCCATTTGAGGGGAGAGGGAACGGAAATA
CCNE1	870497	0.0109402	up	1.58862	-0.59873	0.0690483	898	Homo sapiens cyclin E1 (CCNE1), transcript variant 2, mRNA.	GO:0000082|GO:0007049|GO:0030521|GO:0045893|GO:0051301	GO:0005634|GO:0005654|GO:0005654|GO:0005829|GO:0005829	GO:0003713|GO:0005515|GO:0050681	chr19	30313032	30313190	GCAGAGCTGTTGGATCTCTGTGTCCTGGATGTTGACTGCCTTGAATTTCC
CLDN1	5960296	0.0153913	up	1.59058	1.66169	2.33124	9076	Homo sapiens claudin 1 (CLDN1), mRNA.	GO:0007155|GO:0016338|GO:0044419	GO:0005886|GO:0005887|GO:0005923|GO:0030054	GO:0005198|GO:0042802	chr3	191506599	191506648	GTGCTATCTGTTCAGTGATGCCCTCAGAGCTCTTGCTGTTAGCTGGCAGC
RAB3B	6180195	0.016932	up	1.59151	-2.47825	-1.80785	5865	Homo sapiens RAB3B, member RAS oncogene family (RAB3B), mRNA.	GO:0007264|GO:0015031|GO:0017157	GO:0005886|GO:0008021|GO:0030141	GO:0000166|GO:0003924|GO:0005515|GO:0005525	chr1	52385108	52385157	TTCCTATCGGGCTCCCTGCGGGGCTTTCTCTCACTACAAGTCAAGCTTGG
EGR1	870338	0.0297246	up	1.59229	-0.652978	0.0181262	1958	Homo sapiens early growth response 1 (EGR1), mRNA.	GO:0000122|GO:0006355|GO:0030217|GO:0045941	GO:0005622|GO:0005634	GO:0003700|GO:0008270|GO:0046872	chr5	137804532	137804581	CGTCTTGGTGCCTTTTGTGTGATGCGCCTTGCTGATGGCTTGACATGTGC
CGNL1	110100	0.00851102	up	1.59265	-0.972477	-0.301051	84952	Homo sapiens cingulin-like 1 (CGNL1), mRNA.		GO:0005923|GO:0015629|GO:0016459|GO:0030054|GO:0043296	GO:0003774	chr15	55630050	55630099	GCCCGTTGACTTATTCCATTGCGTCTCTGCTTTAGGGTATGGTTTGGTCG
CDC45L	2320170	0.0170447	up	1.5939	0.0775706	0.750131	8318	Homo sapiens CDC45 cell division cycle 45-like (S. cerevisiae) (CDC45L), mRNA.	GO:0000076|GO:0006260|GO:0006260|GO:0006270|GO:0007049	GO:0005634|GO:0005654|GO:0005654|GO:0005737|GO:0005813	GO:0005515	chr22	17886374	17886423	GCTGAAAGCTGAGGATCGGAGCAAGTTTCTGGACGCACTTATTTCCCTCC
SMOC2	2630437	0.0148281	up	1.59423	0.679466	1.35233	64094	Homo sapiens SPARC related modular calcium binding 2 (SMOC2), mRNA.		GO:0005576|GO:0005578	GO:0005509|GO:0005509|GO:0005509	chr6	168810229	168810278	AGGGCACCCAGTGTCTTAAGGAACCATTTGGAGGACAGTCTGAGAGCAGG
KCNK12	1940193	0.0162414	up	1.59572	2.69694	3.37115	56660	Homo sapiens potassium channel, subfamily K, member 12 (KCNK12), mRNA.	GO:0006811|GO:0006813	GO:0016020|GO:0016021	GO:0005244|GO:0005267|GO:0030955	chr2	47747952	47748001	GCCGCCGGGCGTGGTTTGCTTCTCTCAGTCACTGCTGGCGCTTTCTTAAT
KIAA0319	4920112	0.0317324	up	1.59615	1.59306	2.26765	9856	Homo sapiens KIAA0319 (KIAA0319), transcript variant 1, mRNA.		GO:0016020|GO:0016021		chr6	24652403	24652452	CAGCCTGTGTGTGCACGCCCCATGAGCCGAAAAGTGGGTCTTATGTTTTC
SLC6A10P	7610615	0.0140281	up	1.59637	1.27617	1.95097	386757	Homo sapiens solute carrier family 6 (neurotransmitter transporter, creatine), member 10 (pseudogene) (SLC6A10P) on chromosome 16.				chr16	32888901	32888950	GTCCCGAGACGGCTGAGTGACCCCAAGAAAGGCTTCCCTGACACCCGGAC
FAM184A	4490333	0.0238229	up	1.59772	3.13767	3.81369	79632	Homo sapiens family with sequence similarity 184, member A (FAM184A), transcript variant 1, mRNA.				chr6	119345154	119345203	GCTTCTCCAGATCCCCAGCGCCAGGAGTGGTTTGCCCGGTACTTCACATT
GPC4	6330270	0.0153913	up	1.59791	3.64417	4.32035	2239	Homo sapiens glypican 4 (GPC4), mRNA.	GO:0008283|GO:0009653	GO:0005576|GO:0005578|GO:0005886|GO:0005887|GO:0031225		chrX	132435446	132435495	GTCCCAGGCCAAAGACTAACAACTGCCTTGGGAATCCCTTCCTTGTGTCC
SLC2A6	6180465	0.029248	up	1.59976	-0.66899	0.00886504	11182	Homo sapiens solute carrier family 2 (facilitated glucose transporter), member 6 (SLC2A6), mRNA.	GO:0008643|GO:0055085|GO:0008643|GO:0008643|GO:0008643|GO:0055085	GO:0005886|GO:0016021|GO:0016020|GO:0016021|GO:0016021|GO:0016020|GO:0016021	GO:0005215|GO:0005351|GO:0005355|GO:0022891|GO:0005215|GO:0005351|GO:0005215|GO:0005351|GO:0005215|GO:0005351|GO:0005355|GO:0022891	chr9	135326072	135326121	TGCCCCAGCCCAACCTCTGGGAACAGGCAGCTCCTATCTGCAAACTGTGT
TPX2	6290358	0.00851102	up	1.60115	-0.0127563	0.666354	22974	Homo sapiens TPX2, microtubule-associated, homolog (Xenopus laevis) (TPX2), mRNA.	GO:0007067|GO:0008283	GO:0000922|GO:0005634	GO:0005515|GO:0005524|GO:0005525	chr20	29852491	29852540	CAGCCTCTGACTGTGCCTGTATCTCCCAAATTCTCCACTCGATTCCACTG
LOC728661	360731	0.0430574	up	1.60305	1.37023	2.05105	728661	Homo sapiens similar to solute carrier family 35, member E2 (LOC728661), mRNA.				chr1	1593465	1593514	TCCCTGCGGGCCCCTATGTTTGAGTTTGATGGCTGCTGGATCCTCACTCA
TMEM45A	6280520	0.039061	up	1.60391	-3.03096	-2.34937	55076	Homo sapiens transmembrane protein 45A (TMEM45A), mRNA.		GO:0016020|GO:0016021		chr3	100295941	100295990	TTGGAGAACAGCTGGCTAAGGATGACTCTAAGTGTACTGTTTGCATTTCC
CDKN1A	6660382	0.0443629	up	1.60418	-0.416796	0.26504	1026	Homo sapiens cyclin-dependent kinase inhibitor 1A (p21, Cip1) (CDKN1A), transcript variant 1, mRNA.	GO:0000082|GO:0000086|GO:0006974|GO:0007050|GO:0008285|GO:0008629|GO:0009411|GO:0030308|GO:0030890|GO:0031668|GO:0042326|GO:0043066|GO:0043071|GO:0045736|GO:0048146	GO:0000307|GO:0005634|GO:0005654|GO:0005654|GO:0005654|GO:0005654|GO:0005654|GO:0005654|GO:0005654|GO:0005737|GO:0005829|GO:0005829|GO:0005829	GO:0004860|GO:0004861|GO:0004861|GO:0008270|GO:0030332|GO:0046872	chr6	36762947	36762996	GTCCTGGTTCCCGTTTCTCCACCTAGACTGTAAACCTCTCGAGGGCAGGG
C12orf68	70050	0.0100785	up	1.60418	2.61859	3.30043	387856	Homo sapiens chromosome 12 open reading frame 68 (C12orf68), mRNA.				chr12	48579447	48579496	CCTCAGGGGCAGGGCTTGTGGCTCTGGTGTTAGGTTCAGGGGCTTCAGAC
STK38	830424	0.0414603	up	1.60611	-1.03389	-0.350317	11329	Homo sapiens serine/threonine kinase 38 (STK38), mRNA.	GO:0006464|GO:0006468|GO:0007243	GO:0005634|GO:0005737	GO:0000166|GO:0000287|GO:0004674|GO:0005515|GO:0005515|GO:0005515|GO:0005524|GO:0016740	chr6	36570065	36570114	CTGCAGCTGGGAGCCTGCTTTCTGCCAGTCTTGAGGTTCTGAAGATCAGC
RBMS1	4150639	0.0187497	up	1.60633	-2.77108	-2.08731	5937	Homo sapiens RNA binding motif, single stranded interacting protein 1 (RBMS1), transcript variant 3, mRNA.	GO:0006260|GO:0006396	GO:0005575|GO:0005634	GO:0003677|GO:0003690|GO:0003697|GO:0003723|GO:0005515	chr2	160843364	160843413	GTGCCGTGTTAACTCCCTCAATGGAGCACACCATGTCACTACAGCCCGCA
KCTD10	5390754	0.00768846	up	1.60634	-1.51509	-0.831315	83892	Homo sapiens potassium channel tetramerisation domain containing 10 (KCTD10), mRNA.	GO:0006813	GO:0005634|GO:0008076|GO:0016020	GO:0005249|GO:0005515	chr12	109886624	109886673	CAACAGCGATTCAGGACCCAAGTGTGAACAACACTCAGCCCGCCCTCTGG
HIC2	5820672	0.018995	up	1.60724	2.27518	2.95977	23119	Homo sapiens hypermethylated in cancer 2 (HIC2), mRNA.	GO:0006350|GO:0045892	GO:0005622|GO:0005634	GO:0003677|GO:0008022|GO:0008270|GO:0046872	chr22	20135532	20135581	CTCCTGTACTGGCCACCGCCGCTGTCACTTGTCACATTGAGTTCATGTCC
SCN3B	7380348	0.0250254	up	1.6074	2.74996	3.4347	55800	Homo sapiens sodium channel, voltage-gated, type III, beta (SCN3B), transcript variant 1, mRNA.	GO:0006811|GO:0006814	GO:0005886|GO:0016021	GO:0005244|GO:0005248|GO:0031402	chr11	123500206	123500255	CCCACTTCCTCCCCCTTAGTTGAGTTTGCAGCAGGACGCAGGAGATAAGC
LOC387856	5550259	0.0131217	up	1.6085	3.80878	4.49449	387856	Homo sapiens similar to expressed sequence AI836003 (LOC387856), mRNA.				chr12	46865623	46865672	GTCAATATGTCCTTGCCCACTGCCTCTCGGTGTTGCCTTCATAATGTCTT
IMPDH1	3120431	0.0371574	up	1.61012	-2.79252	-2.10535	3614	Homo sapiens IMP (inosine monophosphate) dehydrogenase 1 (IMPDH1), transcript variant 1, mRNA.	GO:0006164|GO:0006177|GO:0008152|GO:0046651|GO:0006164|GO:0006177|GO:0007601|GO:0046651|GO:0050896|GO:0055114	GO:0005829	GO:0003824|GO:0003938|GO:0003938|GO:0003938|GO:0016491|GO:0030955|GO:0046872	chr7	127819687	127819736	GTCATGGCCGCCTGCCTGTCATTCCTGACTCACCACCGTCCCCAGGTGAA
SAMD11	520239	0.00851102	up	1.61285	-0.756824	-0.0672134	148398	Homo sapiens sterile alpha motif domain containing 11 (SAMD11), mRNA.		GO:0005634		chr1	868515	868564	CAAACTTCACCCAAGCAGGAGAATGGGACCTTGGCTCTACTTCCAGGGGC
NEK6	5860463	0.0153913	up	1.61505	-0.602852	0.0887267	10783	Homo sapiens NIMA (never in mitosis gene a)-related kinase 6 (NEK6), mRNA.	GO:0006468|GO:0006915|GO:0007049|GO:0007059|GO:0007067|GO:0030071|GO:0043123|GO:0051301|GO:0006468|GO:0006468|GO:0006468|GO:0006468|GO:0006468|GO:0006468|GO:0006468|GO:0006468	GO:0005634|GO:0005737|GO:0005737|GO:0005737|GO:0005737|GO:0005737|GO:0005737|GO:0005737|GO:0005737	GO:0000166|GO:0000287|GO:0004674|GO:0004871|GO:0005515|GO:0005515|GO:0005515|GO:0005524|GO:0016740|GO:0000166|GO:0004674|GO:0005524|GO:0016740|GO:0000166|GO:0004672|GO:0005524|GO:0000166|GO:0004674|GO:0004713|GO:0005524|GO:0016740|GO:0000166|GO:0004672|GO:0005524|GO:0000166|GO:0004674|GO:0005524|GO:0016740|GO:0004674|GO:0005524|GO:0000166|GO:0004674|GO:0005524|GO:0016740|GO:0000166|GO:0004674|GO:…	chr9	126154389	126154438	GGGCGGCTGCTGTTTCCACACGTGGACTCGGATCTGCTGTGACACCGTCA
SDC1	6590592	0.0490976	up	1.62124	-1.2203	-0.523202	6382	Homo sapiens syndecan 1 (SDC1), transcript variant 1, mRNA.		GO:0005887|GO:0016020	GO:0008092	chr2	20400667	20400716	ACTGCGACTTTCTGCCTGGAGTGTATGACTGCACATGACTCGGGGGTGGG
CENPF	4780129	0.0276781	up	1.62177	1.23908	1.93664	1063	Homo sapiens centromere protein F, 350/400ka (mitosin) (CENPF), mRNA.	GO:0000085|GO:0000085|GO:0007067|GO:0007094|GO:0008283|GO:0008283|GO:0016202|GO:0016481|GO:0042493|GO:0051301|GO:0051310|GO:0051382	GO:0000785|GO:0000922|GO:0000940|GO:0000940|GO:0000940|GO:0005634|GO:0005634|GO:0005635|GO:0005694|GO:0005737|GO:0016363	GO:0003682|GO:0008022|GO:0008134|GO:0042803|GO:0045502|GO:0046982	chr1	212904364	212904413	CCAGTGAGGGCTGCAGGCTTCCTAGAGGTGTGCTATACCATGCGTCTGTC
CKAP2L	6380324	0.0148451	up	1.62181	0.0242847	0.721887	150468	Homo sapiens cytoskeleton associated protein 2-like (CKAP2L), mRNA.				chr2	113212054	113212103	AGTGCAAGCCCCAGAGACTGTTGTAGGTTGCTTTTTCTTCCTCCTGGGCA
SLITRK3	20037	0.0284661	up	1.62337	2.65045	3.34943	22865	Homo sapiens SLIT and NTRK-like family, member 3 (SLITRK3), mRNA.	GO:0007409	GO:0016020|GO:0016021	GO:0005515	chr3	166387465	166387514	GCCGAAGACACACGCCTAGGGATGAGCACCCTCTTTGTGACACTTCATCC
SOSTDC1	4810273	0.0184049	up	1.62484	0.699246	1.39955	25928	Homo sapiens sclerostin domain containing 1 (SOSTDC1), mRNA.	GO:0007389|GO:0016055|GO:0030514|GO:0042475	GO:0005576|GO:0005615	GO:0005515	chr7	16501795	16501844	CTCAGATACCCTCCATCTACTGGCCCATCCCCTCTCCTAAACAAAACTCC
ARMCX1	4230451	0.0454531	up	1.62487	-0.100012	0.60031	51309	Homo sapiens armadillo repeat containing, X-linked 1 (ARMCX1), mRNA.		GO:0016020|GO:0016021	GO:0005488	chrX	100695454	100695503	CATGGTCTGTCGCTTGGACTCAGCTGTGCAGATGGCTGGGCTAAGACTGT
FHDC1	3360349	0.0497846	up	1.62516	1.02578	1.72636	85462	Homo sapiens FH2 domain containing 1 (FHDC1), mRNA.	GO:0016043|GO:0030036		GO:0003779	chr4	153900462	153900511	CCTGGGTCAGCTCCTCAGAACCAACCCCCAGCATCTCTAAAGCAAAAGCC
ESRRG	150136	0.0153898	up	1.62659	0.283897	0.985745	2104	Homo sapiens estrogen-related receptor gamma (ESRRG), transcript variant 1, mRNA.	GO:0006350|GO:0045893	GO:0005634	GO:0003700|GO:0003707|GO:0005496|GO:0005515|GO:0008270|GO:0016563|GO:0043565|GO:0046872|GO:0050682	chr1	216896625	216896674	GCTGGGGTGCACAAATAATGGTTGCCGGTCGCACATGGATTCGGTAGAAC
CGN	1980670	0.00768846	up	1.6295	1.27916	1.98359	57530	Homo sapiens cingulin (CGN), mRNA.	GO:0008150	GO:0005923|GO:0016459|GO:0030054|GO:0043296|GO:0043296	GO:0003774|GO:0003779|GO:0005515	chr1	149777635	149777684	CCTAAGCAGGTTGTATAGGGAGCCGGTGGCAGGAGGAAGGCTGTTTTCAC
C17orf53	4570224	0.0443297	up	1.6312	0.180741	0.886678	78995	Homo sapiens chromosome 17 open reading frame 53 (C17orf53), mRNA.				chr17	39595293	39595342	TCCATGCCCAAGGTTCCCAGGTGCAGGACAGAGGTGTGGCCTATTGTACC
RAD51AP1	4150196	0.0174535	up	1.63172	0.0783873	0.784782	10635	Homo sapiens RAD51 associated protein 1 (RAD51AP1), mRNA.	GO:0000724|GO:0006281	GO:0005634	GO:0003677|GO:0003690|GO:0003697|GO:0003723|GO:0005515	chr12	4539054	4539103	CCCTTTTTCTTGATACCACTCATCCACGTGTTCCTGATTGTCCACATTTC
PIK3R2	2140097	0.0450534	up	1.63173	0.0527728	0.759177	5296	Homo sapiens phosphoinositide-3-kinase, regulatory subunit 2 (beta) (PIK3R2), mRNA.	GO:0007165|GO:0019987|GO:0007165|GO:0019987	GO:0005622|GO:0005942|GO:0005622|GO:0005829|GO:0005942	GO:0005515|GO:0016303|GO:0035014|GO:0005515|GO:0016303|GO:0035014	chr19	18142222	18142271	TTTGGGACAAGAGCCCTGGTTTTCTACGCTGCCCTTGGCCACCACACTGC
HJURP	3180367	0.00768846	up	1.63298	-0.143659	0.563845	55355	Homo sapiens Holliday junction recognition protein (HJURP), mRNA.		GO:0005634	GO:0003677	chr2	234749271	234749320	ATGGGGTGGACAACACCGTCAGACCGGGAGACCAGGGCAGCTCTTCACAG
NOV	4290037	0.0489439	up	1.63458	-1.67705	-0.968134	4856	Homo sapiens nephroblastoma overexpressed gene (NOV), mRNA.	GO:0001558	GO:0005576	GO:0005520|GO:0008083	chr8	120505381	120505430	TGAGGCCCAAAGCACTTGCTTACATCCTCTGATAGCTGTTTCAAATGTGC
PTDSS1	60128	0.0162414	up	1.63726	-0.588023	0.12326	9791	Homo sapiens phosphatidylserine synthase 1 (PTDSS1), mRNA.	GO:0006659|GO:0006659|GO:0008654	GO:0016020|GO:0016021	GO:0016740	chr8	97346157	97346206	GGCGAGTATACACCAATCAGGAGAGGGTAGCTGCCTGCATAGGAGCCTCG
PPM1F	240348	0.0498355	up	1.6398	-0.495179	0.218343	9647	Homo sapiens protein phosphatase 1F (PP2C domain containing) (PPM1F), mRNA.	GO:0006470|GO:0006470|GO:0006915	GO:0008287|GO:0008287	GO:0000287|GO:0004722|GO:0016787|GO:0000287|GO:0004722|GO:0016787|GO:0030145	chr22	22273825	22273874	GACAAGTCCCAAGATGCCAGAAAGGCAGTCTCCCAAGGACCCACCATGCA
TIMP4	1090326	0.0212962	up	1.64081	0.592656	1.30706	7079	Homo sapiens TIMP metallopeptidase inhibitor 4 (TIMP4), mRNA.	GO:0008150	GO:0005576|GO:0005578	GO:0004857|GO:0005515|GO:0008191	chr3	12194911	12194960	CTCCTTCCCTGCAGAGCTTTGGCCATTACCACCTGACCTCTTGCTGCCAG
METRNL	50095	0.0106309	up	1.64242	-1.57058	-0.854765	284207	PREDICTED: Homo sapiens meteorin, glial cell differentiation regulator-like (METRNL), mRNA.		GO:0005576					ACAGGCTTCCAGTACGAGCTGGTTAGGAGGCACAGGGCGTCGGACCTGCA
ADAMTS9	1570382	0.0257309	up	1.64282	-0.0204032	0.695767	56999	Homo sapiens ADAM metallopeptidase with thrombospondin type 1 motif, 9 (ADAMTS9), mRNA.	GO:0006508|GO:0006516|GO:0007275|GO:0006508	GO:0005576|GO:0005578|GO:0005576|GO:0005578	GO:0004222|GO:0008233|GO:0008270|GO:0046872|GO:0004222|GO:0008233|GO:0008270|GO:0046872	chr3	64580059	64580108	AGCCATGGTCTTTCTGCCCCTCCAAGCTGATGAAGGGAAGCCTTTGCCAA
MCM4	6020170	0.0218674	up	1.64283	0.173243	0.889423	4173	Homo sapiens minichromosome maintenance complex component 4 (MCM4), transcript variant 1, mRNA.	GO:0006268|GO:0006260|GO:0006260|GO:0006268|GO:0006270|GO:0006350|GO:0006355	GO:0005634|GO:0005654|GO:0005654|GO:0005654|GO:0005654|GO:0005654|GO:0005654|GO:0005654|GO:0005730	GO:0003678|GO:0003697|GO:0005515|GO:0016787|GO:0017111|GO:0000166|GO:0003677|GO:0003678|GO:0003697|GO:0005515|GO:0005524|GO:0017111	chr8	48889351	48889400	AAGGAAGGCTCCCTGCATGTCCTGCTTGCTGCACGCCACATGGGTGTGGT
ARID3B	5960670	0.0361897	up	1.64354	1.70087	2.41768	10620	Homo sapiens AT rich interactive domain 3B (BRIGHT-like) (ARID3B), mRNA.	GO:0006350|GO:0006355|GO:0008150	GO:0005622|GO:0005634	GO:0003677	chr15	72677313	72677362	AAGGTGCCATCAGCCAGGGCAGCTCTGTCCCCTCCTGCTCTCCATCTTAT
ANLN	6450669	0.0475504	up	1.64693	-1.5144	-0.794618	54443	Homo sapiens anillin, actin binding protein (ANLN), mRNA.	GO:0000910|GO:0000921|GO:0007049|GO:0007067|GO:0007096	GO:0005634|GO:0005737|GO:0005826	GO:0003779	chr7	36446055	36446104	TCAGAAAAGTGATGTGGACATAGGAGGCAATGTGTGAGACTTGGGGGTTC
TEAD4	4040746	0.0162414	up	1.6475	-1.88802	-1.16774	7004	Homo sapiens TEA domain family member 4 (TEAD4), transcript variant 3, mRNA.	GO:0001501|GO:0006350|GO:0006357|GO:0007517	GO:0005634	GO:0003700|GO:0003702	chr12	3019979	3020028	GGCAGCCCCCTGAAGTGCCAAGAGAGCTGAGAGGAGCAGTTGTGACTCTA
CCNB1	4590040	0.0419254	up	1.64892	0.445278	1.1668	891	Homo sapiens cyclin B1 (CCNB1), mRNA.	GO:0000086|GO:0007049|GO:0007067|GO:0031145|GO:0051301|GO:0051437	GO:0005575|GO:0005634|GO:0005654|GO:0005654|GO:0005654|GO:0005654|GO:0005654|GO:0005654|GO:0005737|GO:0005813|GO:0005829|GO:0005829|GO:0005829	GO:0005515|GO:0005515|GO:0005515	chr5	68473790	68473839	ACTTCCATAGGACATACTGCATGTAAGCCAAGTCATGGAGAATCTGCTGC
AEN	5090438	0.0162414	up	1.64944	-0.322055	0.399917	64782	Homo sapiens apoptosis enhancing nuclease (AEN), mRNA.				chr15	89175121	89175170	ACACTGTGCGGGAGGTGACAACAGAGCAAAGCAGCGCAGGGGTCAGGGAG
EPB41L2	7200167	0.0119357	up	1.65514	-0.852043	-0.125092	2037	Homo sapiens erythrocyte membrane protein band 4.1-like 2 (EPB41L2), mRNA.	GO:0030866	GO:0005634|GO:0005730|GO:0005737|GO:0005856|GO:0005886|GO:0008091|GO:0019898|GO:0031012|GO:0005737|GO:0005856|GO:0019898	GO:0003779|GO:0005198|GO:0005488|GO:0008092	chr6	131202611	131202660	CAGACACATGCCCTTCGGCAGCATTCCAGAACAGGAGGGAAGAGAAAGAG
AKR1C2	5340129	0.0342556	up	1.65522	-3.36867	-2.64165	1646	Homo sapiens aldo-keto reductase family 1, member C2 (dihydrodiol dehydrogenase 2; bile acid binding protein; 3-alpha hydroxysteroid dehydrogenase, type III) (AKR1C2), transcript variant 1, mRNA. XM_943424 XM_943425 XM_943427	GO:0006629|GO:0006693|GO:0007586|GO:0008202|GO:0055114	GO:0005737	GO:0016491|GO:0032052|GO:0047026|GO:0047115	chr10	5036139	5036188	CCTGCTTGGCGACTTCAGTAAGCTACAGCTAAGCCCATCGGCCGGAAAAG
MPP3	6650711	0.0248377	up	1.65708	0.285588	1.01423	4356	Homo sapiens membrane protein, palmitoylated 3 (MAGUK p55 subfamily member 3) (MPP3), transcript variant 2, transcribed RNA.	GO:0007165	GO:0005887|GO:0009986	GO:0005515|GO:0004385|GO:0005515	chr17	41878413	41878462	CTGCAGTGGTGCCTTCAGGGACTCGAGGAATGTAAGGTTGCCTTTCCCCT
DLGAP5	5220095	0.0121768	up	1.65723	-0.0876745	0.641102	9787	Homo sapiens discs, large (Drosophila) homolog-associated protein 5 (DLGAP5), mRNA.	GO:0000087|GO:0007049|GO:0007079|GO:0007267|GO:0008283|GO:0045842	GO:0005634|GO:0005737|GO:0031616	GO:0004721|GO:0005515	chr14	54688327	54688376	ATCCAGTGAGAGAATGAGTTTGCCTCTTCTTGCTGGTGGAGTAGCAGATG
CEP55	7510709	0.0153913	up	1.65793	-0.947165	-0.217778	55165	Homo sapiens centrosomal protein 55kDa (CEP55), mRNA.	GO:0007049|GO:0007067|GO:0051301			chr10	95278458	95278507	GCTGTGTTCCCCAACTCTGTTCTGCGCACGAAACAGTATCTGTTTGAGGC
MALT1	1770386	0.0373085	up	1.65859	-1.86582	-1.13587	10892	Homo sapiens mucosa associated lymphoid tissue lymphoma translocation gene 1 (MALT1), transcript variant 1, mRNA.	GO:0002726|GO:0006508|GO:0006511|GO:0006916|GO:0006916|GO:0006952|GO:0007250|GO:0032743|GO:0042981|GO:0043123|GO:0050852|GO:0050870|GO:0051168|GO:0051259	GO:0005634|GO:0005634|GO:0005737|GO:0005737|GO:0005829|GO:0032449	GO:0004197|GO:0004842|GO:0004842|GO:0004871|GO:0008233|GO:0019209|GO:0043621	chr18	54568095	54568144	TCCCCTTAAGATTGGGAAGAAGGACAAGGATGTTCACTCGGCACTACTTC
ZCCHC12	2690279	0.0265439	up	1.66117	5.21751	5.9497	170261	Homo sapiens zinc finger, CCHC domain containing 12 (ZCCHC12), mRNA.	GO:0006350|GO:0006355		GO:0003676|GO:0008270|GO:0046872	chrX	117844643	117844692	CCCTGCAGCCTACGGGTCTGTTTTCTGTGTGTGCCCATTTCCTTGACAGC
ERC2	7150050	0.0489721	up	1.6621	2.65949	3.3925	26059	Homo sapiens ELKS/RAB6-interacting/CAST family member 2 (ERC2), mRNA.		GO:0005737|GO:0005856|GO:0019717|GO:0030054|GO:0030426|GO:0042734|GO:0045202	GO:0005515|GO:0005515|GO:0005515	chr3	55743921	55743970	GTGGCGATTGAATGCTGCCCAGGGTCAGTGTATCTAATTCCCCGAGACCC
STAC	6520435	0.0297246	up	1.66515	-1.60004	-0.864393	6769	Homo sapiens SH3 and cysteine rich domain (STAC), mRNA.	GO:0007242	GO:0005625|GO:0005737	GO:0008270|GO:0019992|GO:0046872	chr3	36563278	36563327	GTTGGGAACTGAGAGGGGATGGCTGCTGGTTTCACAGAAGTTTGGATGCC
TOP2A	3990619	0.0174535	up	1.669	0.369927	1.10891	7153	Homo sapiens topoisomerase (DNA) II alpha 170kDa (TOP2A), mRNA.	GO:0006260|GO:0006265|GO:0006266|GO:0006281|GO:0007059|GO:0007059|GO:0007059|GO:0007059|GO:0030261|GO:0030263|GO:0040016|GO:0043065|GO:0045870|GO:0045944|GO:0048015	GO:0000793|GO:0005634|GO:0005634|GO:0005634|GO:0005634|GO:0005654|GO:0005694|GO:0005730|GO:0005730|GO:0005737|GO:0005814|GO:0009330|GO:0019035	GO:0000166|GO:0003682|GO:0003918|GO:0003918|GO:0005080|GO:0005524|GO:0008022|GO:0008022|GO:0008094|GO:0008144|GO:0042803|GO:0042826|GO:0042826|GO:0043130|GO:0046982	chr17	38545066	38545115	TTTCAGCTCTTGACCTGTCCCCTCTGGCTGCCTCTGAGTCTGAATCTCCC
CERK	2230367	0.0437654	up	1.67063	0.185202	0.925594	64781	Homo sapiens ceramide kinase (CERK), transcript variant 1, mRNA.	GO:0006672|GO:0007205	GO:0000299|GO:0005737|GO:0016020	GO:0000287|GO:0001729|GO:0004143|GO:0005509|GO:0016740|GO:0016301	chr22	45459303	45459352	GCTCTGATTTCCGGGGCAGCCTTTCAGATGCGGCAGACATACAACACCTG
C12orf48	990136	0.0376432	up	1.67066	-1.11101	-0.370591	55010	Homo sapiens chromosome 12 open reading frame 48 (C12orf48), mRNA.		GO:0005634|GO:0005737	GO:0003677	chr12	101115233	101115282	ACACTTTCAGATAAGAGGTGTTTGCTGGGATGGAAGAACTACCTGGCATG
DUSP5P	2100373	0.0248377	up	1.67107	-0.00748332	0.733285	574029	Homo sapiens dual specificity phosphatase 5 pseudogene (DUSP5P), non-coding RNA.				chr1	226854552	226854601	CCAGGTGCCAGGAGGAAAAGGGTACTTGCTGTGTATCCTGGGTCAGTAAT
DUSP6	6250468	0.0166145	up	1.6712	-0.228255	0.51263	1848	Homo sapiens dual specificity phosphatase 6 (DUSP6), transcript variant 1, mRNA.	GO:0000188|GO:0006470	GO:0005625|GO:0005654|GO:0005737	GO:0004722|GO:0004725|GO:0004725|GO:0005515|GO:0016787|GO:0017017	chr12	89744608	89744657	CTGACCTTGACCGAGACCCCAATAGTGCAACAGACTCGGATGGTAGTCCG
FOS	4280017	0.02354	up	1.67299	0.758262	1.50069	2353	Homo sapiens v-fos FBJ murine osteosarcoma viral oncogene homolog (FOS), mRNA.	GO:0006306|GO:0006357|GO:0006954|GO:0007399|GO:0034614	GO:0005634|GO:0005667	GO:0003700|GO:0003704|GO:0043565|GO:0046983	chr14	74818114	74818163	CCCAGTGACACTTCAGAGAGCTGGTAGTTAGTAGCATGTTGAGCCAGGCC
LOC653506	2030132	0.0153913	up	1.67483	-1.32193	-0.577915	653506	PREDICTED: Homo sapiens similar to meteorin, glial cell differentiation regulator-like (LOC653506), mRNA.				chr17	7533	7582	TTTCAGGCCGCCGGTTGTTTCCGTTCCCGAGAATAAAGACGAGGATCCGA
METRNL	4150689	0.0100785	up	1.67495	-1.69492	-0.950798	284207	PREDICTED: Homo sapiens meteorin, glial cell differentiation regulator-like (METRNL), mRNA.		GO:0005576					TCCCGTGTCTTAAAACGCCTTGGTGTGCCGTCTGATACTGTTCTCTAAAG
CCNE1	3990026	0.0096955	up	1.67755	-0.729885	0.0164741	898	Homo sapiens cyclin E1 (CCNE1), transcript variant 1, mRNA.	GO:0000082|GO:0007049|GO:0030521|GO:0045893|GO:0051301	GO:0005634|GO:0005654|GO:0005654|GO:0005829|GO:0005829	GO:0003713|GO:0005515|GO:0050681	chr19	30315041	30315090	TTGTACCAAGTGGAGCAGGTGGTTGCGGGCAAGCGTTGTGCAGAGCCCAT
HEG1	3290347	0.0248377	up	1.67929	-1.31242	-0.564565	57493	Homo sapiens HEG homolog 1 (zebrafish) (HEG1), mRNA.		GO:0005576|GO:0016020|GO:0016021	GO:0005509	chr3	126167785	126167834	CCAAAGGGGGACCATTCAGGTCTAAAAAGCGACAGGTCCGAGACTGGGTC
APBB1IP	1820722	0.0354854	up	1.68124	-2.53863	-1.7891	54518	Homo sapiens amyloid beta (A4) precursor protein-binding, family B, member 1 interacting protein (APBB1IP), mRNA.	GO:0007165|GO:0007165	GO:0005737|GO:0005856|GO:0005886|GO:0030054|GO:0042995		chr10	26840683	26840732	CATGATGAGTGTTCCAGAGGGAGAAGCATCGCTGACCCCGAGCGCAGGTT
MELK	160097	0.00768846	up	1.68245	-0.781685	-0.0311184	9833	Homo sapiens maternal embryonic leucine zipper kinase (MELK), mRNA.	GO:0006468	GO:0005737	GO:0000166|GO:0004674|GO:0005515|GO:0005524|GO:0016740	chr9	36641807	36641856	TGATGGATTCTTCCATCCTGCCGGATGAGTGTGGGTGTGATACAGCCTAC
DCBLD2	60132	0.0414418	up	1.68332	-0.860791	-0.109477	131566	Homo sapiens discoidin, CUB and LCCL domain containing 2 (DCBLD2), mRNA.	GO:0007155|GO:0030308|GO:0030308|GO:0030522|GO:0042060|GO:0042060|GO:0042060	GO:0005887|GO:0005887|GO:0005887|GO:0009986|GO:0009986|GO:0009986|GO:0016020	GO:0005515	chr3	99997956	99998005	CACCTTTGCCCTGGCTCTGCATTGTCACCTAGAGAGCAAGAGGTCTATAG
FEN1	3370703	0.0164316	up	1.68423	0.508111	1.2602	2237	Homo sapiens flap structure-specific endonuclease 1 (FEN1), mRNA.	GO:0006260|GO:0006302|GO:0009650|GO:0048015	GO:0005634	GO:0000287|GO:0003684|GO:0003690|GO:0004519|GO:0004523|GO:0005515|GO:0005515|GO:0008309|GO:0008409|GO:0016787|GO:0017108|GO:0017108|GO:0030145	chr11	61321035	61321084	GAGAAGATGGGCAGAAAGCTGGAGCCCCTGGAGTTGGCTGTGTCTGTGTT
DAB2	3930367	0.00768846	up	1.68605	-5.98408	-5.23043	1601	Homo sapiens disabled homolog 2, mitogen-responsive phosphoprotein (Drosophila) (DAB2), mRNA.	GO:0000904|GO:0001701|GO:0006898|GO:0006907|GO:0007588|GO:0008283	GO:0005905|GO:0016020|GO:0031410	GO:0008022	chr5	39408506	39408555	GCTCCTGGGTTCAAGTAGTATTACCACCCTTTCACAAGCAACAGACTCTC
TMEM132A	1690370	0.0250632	up	1.68784	2.72479	3.47998	54972	Homo sapiens transmembrane protein 132A (TMEM132A), transcript variant 2, mRNA.		GO:0000139|GO:0005783|GO:0005789|GO:0005794|GO:0016020|GO:0016021		chr11	60460878	60460927	TGGGTGTGTGAGGACATGGGGCTGAAGGACCCTGAGGAGCTTCGCAACTA
PRC1	2070494	0.0251428	up	1.68787	-0.205145	0.550061	9055	Homo sapiens protein regulator of cytokinesis 1 (PRC1), transcript variant 2, mRNA.	GO:0000022|GO:0000910|GO:0007049	GO:0005634|GO:0005737|GO:0005876	GO:0005515	chr15	91509500	91509549	CATGTCACTACTGGGGAGGTGTTCCTGCTCTAGCTTCCACGATGAGGCGC
PTGER4	2940438	0.00768846	up	1.68805	-0.305896	0.449458	5734	Homo sapiens prostaglandin E receptor 4 (subtype EP4) (PTGER4), mRNA.	GO:0006955|GO:0007165|GO:0007186|GO:0007188|GO:0030278	GO:0005886|GO:0016021	GO:0004872|GO:0004957	chr5	40693612	40693661	GGGGCACTTAATGGTCACCTTGTAACAGTTTTGTGTAACTCCCAGTGATG
NUSAP1	6350053	0.0166145	up	1.69035	0.536757	1.29408	51203	Homo sapiens nucleolar and spindle associated protein 1 (NUSAP1), transcript variant 2, mRNA.	GO:0000281|GO:0007049|GO:0007076|GO:0040001|GO:0045840|GO:0051301	GO:0005634|GO:0005737|GO:0005874	GO:0003677	chr15	39459619	39459668	GGAGAAGAAAGCAAAGGTTTTGGGAATGCGAAGGGGCCTCATTTTGGCTG
ASF1B	2630673	0.0276781	up	1.69077	-0.346694	0.410986	55723	Homo sapiens ASF1 anti-silencing function 1 homolog B (S. cerevisiae) (ASF1B), mRNA.	GO:0006333|GO:0006334|GO:0006350|GO:0006355|GO:0007275|GO:0007283|GO:0016568|GO:0030154	GO:0000785|GO:0005634	GO:0042393	chr19	14230475	14230524	TCCTCTGCTAGGACCAGGGTGATTTCAAGCCAGGGAAGCAACTGGGACCC
CCNA2	2650608	0.0107609	up	1.69123	-0.23345	0.524623	890	Homo sapiens cyclin A2 (CCNA2), mRNA.	GO:0007049|GO:0007067|GO:0007095|GO:0045941|GO:0051301	GO:0001939|GO:0001940|GO:0005634|GO:0005654|GO:0005737	GO:0005515|GO:0005515	chr4	122958685	122958734	CCTTGTCTCATGGACCTTCACCAGACCTACCTCAAAGCACCACAGCATGC
HPRT1	6400270	0.0153913	up	1.69276	-2.70335	-1.94398	3251	Homo sapiens hypoxanthine phosphoribosyltransferase 1 (Lesch-Nyhan syndrome) (HPRT1), mRNA.	GO:0001975|GO:0006164|GO:0006166|GO:0006168|GO:0006178|GO:0007625|GO:0009116|GO:0019835|GO:0021756|GO:0021895|GO:0021954|GO:0045964|GO:0046651|GO:0048813|GO:0006164|GO:0006166|GO:0007610|GO:0009116|GO:0045964|GO:0046100|GO:0051289	GO:0005737|GO:0005737|GO:0005829	GO:0004422|GO:0016740|GO:0042802|GO:0000287|GO:0004422|GO:0004422|GO:0004422|GO:0005515|GO:0016757|GO:0042803	chrX	133461952	133462001	TTGCACTATGAGCCTATAGACTATCAGTTCCCTTTGGGCGGATTGTTGTT
ADARB2	6110519	0.0153913	up	1.6931	0.355735	1.11541	105	Homo sapiens adenosine deaminase, RNA-specific, B2 (RED2 homolog rat) (ADARB2), mRNA.	GO:0006397|GO:0006396|GO:0006396|GO:0006396|GO:0006396	GO:0005622|GO:0005634	GO:0003725|GO:0003727|GO:0004000|GO:0008270|GO:0016787|GO:0046872|GO:0003723|GO:0004000|GO:0003723|GO:0004000|GO:0003723|GO:0004000|GO:0003723|GO:0004000	chr10	1218169	1218218	GTCCGTCATGGCGTTTGGTTTATGGTGGCCGATACTAAGAGCCACTGAGG
KIAA1737	380379	0.0195739	up	1.69323	1.29783	2.0576	85457	Homo sapiens KIAA1737 (KIAA1737), mRNA.		GO:0005634|GO:0005737		chr14	76652976	76653025	GGCTATGAAGTACTGTGGCAGAGCTGCTGTTTTCTGAAGGTGAGAAGCCA
IGFBP3	6840372	0.0263414	up	1.69453	-7.74347	-6.98259	3486	Homo sapiens insulin-like growth factor binding protein 3 (IGFBP3), transcript variant 1, mRNA.	GO:0001558|GO:0001933|GO:0009968|GO:0014912|GO:0043065|GO:0045663|GO:0048662	GO:0005576|GO:0005634|GO:0016942	GO:0008160|GO:0031994|GO:0046872	chr7	45991471	45991520	CGGAGGCCAAACCCAAGAAGGTCTGGCAAAGTCAGGCTCAGGGAGACTCT
ACOT7	6580639	0.0383335	up	1.6947	1.20715	1.96818	11332	Homo sapiens acyl-CoA thioesterase 7 (ACOT7), transcript variant hBACHa, mRNA.	GO:0006629	GO:0005737|GO:0005739	GO:0000062|GO:0004091|GO:0016290|GO:0016787	chr1	6376196	6376245	ATGGAGATCGAGGTGTTGGTGGACGCCGACCCTGTTGTGGACAGCTCTCA
PLEKHG4B	7320347	0.0359274	up	1.69803	1.52682	2.29068	153478	Homo sapiens pleckstrin homology domain containing, family G (with RhoGef domain) member 4B (PLEKHG4B), mRNA.	GO:0035023	GO:0005622	GO:0005089	chr5	189916	189965	GTTGGGCCACACAGAGCCCGAGTAGGTAAAGGAAGGTTCTGGAAACCACT
ST8SIA3	160202	0.00347396	up	1.70437	0.337119	1.10636	51046	Homo sapiens ST8 alpha-N-acetyl-neuraminide alpha-2,8-sialyltransferase 3 (ST8SIA3), mRNA.	GO:0006486|GO:0006491|GO:0006688|GO:0009311	GO:0000139|GO:0005794|GO:0016020|GO:0016021|GO:0030173	GO:0003828	chr18	53186884	53186933	CAAGCTGCCAGAATGTGAGGGCCACAGAGACCCAAGAGAAGCCAGCACTG
LBH	2810246	0.031533	up	1.7055	-2.67316	-1.90297	81606	Homo sapiens limb bud and heart development homolog (mouse) (LBH), mRNA.	GO:0006350|GO:0006355|GO:0007275	GO:0005634|GO:0005737		chr2	30336048	30336097	GTCCCTAGACCACTTTGTATGACCGTTTGCAGTCTGAGCAGGCCAGGGGC
LGI1	4150068	0.0201965	up	1.70806	0.537855	1.31021	9211	Homo sapiens leucine-rich, glioma inactivated 1 (LGI1), mRNA.	GO:0007399|GO:0008283	GO:0005576	GO:0005515	chr10	95547664	95547713	GAGACTGCTAGAACCAAGCACTACCAGTATCTCCATCCTTAACTGTCCAG
CDH13	5820563	0.0162215	up	1.70898	-3.93658	-3.16344	1012	Homo sapiens cadherin 13, H-cadherin (heart) (CDH13), mRNA.	GO:0001938|GO:0001954|GO:0002040|GO:0007156|GO:0007162|GO:0007266|GO:0008285|GO:0016339|GO:0016601|GO:0030032|GO:0030100|GO:0030335|GO:0042058|GO:0043542|GO:0043616|GO:0045885|GO:0048661|GO:0050850|GO:0050927|GO:0051668|GO:0055096	GO:0016020|GO:0016020|GO:0005615|GO:0005737|GO:0005886|GO:0005901|GO:0009897|GO:0031225|GO:0043005	GO:0005509|GO:0005509|GO:0005509|GO:0030169|GO:0042803|GO:0045296|GO:0055100	chr16	82387382	82387431	AGTGACAGCTTGTGGCTTTTTATTAGAGCTCGCCACGAACTAGGGTAAGG
FLRT2	4610056	0.0109554	up	1.71345	-2.21842	-1.44151	23768	Homo sapiens fibronectin leucine rich transmembrane protein 2 (FLRT2), mRNA.	GO:0006644|GO:0007155|GO:0008150|GO:0016042	GO:0005578|GO:0005887|GO:0016020	GO:0004623|GO:0005057|GO:0030674	chr14	85163590	85163639	CTACCTGCACACCCACCAGAAGAGCACAAAGCAAGGCCATTGCAACAGGC
LOC644278	5360053	0.0355268	up	1.71393	1.65533	2.43264	644278	PREDICTED: Homo sapiens similar to bruno-like 4, RNA binding protein (LOC644278), mRNA.				chr12	103065354	103065403	GTGCAGACCGCCATCCAGGCCATGAACGGCTTCCAGGTCAGCATGAAGAG
CDC20	1500010	0.00949059	up	1.71646	0.657227	1.43666	991	Homo sapiens cell division cycle 20 homolog (S. cerevisiae) (CDC20), mRNA.	GO:0006511|GO:0007049|GO:0007067|GO:0031145|GO:0051301|GO:0051436|GO:0051437	GO:0005654|GO:0005654|GO:0005819|GO:0005829|GO:0005829|GO:0005829|GO:0005829|GO:0005829	GO:0005515|GO:0005515|GO:0005515|GO:0005515|GO:0005515|GO:0005515|GO:0005515|GO:0005515	chr1	43601340	43601389	AAGGCCAGTGCAGCCAAAAGCAGCCTCATCCACCAAGGCATCCGCTGAAG
ARHGAP22	510520	0.0158294	up	1.71689	-3.06971	-2.28992	58504	Homo sapiens Rho GTPase activating protein 22 (ARHGAP22), mRNA.	GO:0001525|GO:0006350|GO:0006355|GO:0007165|GO:0007275|GO:0030154|GO:0007165|GO:0007165	GO:0005622|GO:0005634|GO:0005737|GO:0005622|GO:0005622	GO:0005096	chr10	49654136	49654185	GCCCTTACCCAGGAAATATCCTTCATGGCCACAGAAATGGAGGGCGCCCA
DUT	6280242	0.0153898	up	1.71778	0.225379	1.00592	1854	Homo sapiens deoxyuridine triphosphatase (DUT), nuclear gene encoding mitochondrial protein, transcript variant 1, mRNA.	GO:0046080|GO:0006139|GO:0006260|GO:0009117|GO:0046080	GO:0005739|GO:0005634|GO:0005739|GO:0005739|GO:0005829	GO:0004170|GO:0016787|GO:0000287|GO:0004170|GO:0004170|GO:0016787	chr15	46422761	46422810	GAAATCAACTCAGTGGGACATAGCCAGCATTTTTGCATACCAGGTTGGGC
KIF20A	1050195	0.0121768	up	1.71931	-0.861988	-0.0801592	10112	Homo sapiens kinesin family member 20A (KIF20A), mRNA.	GO:0007018|GO:0015031|GO:0016192	GO:0005654|GO:0005794|GO:0005874|GO:0005875	GO:0000166|GO:0003777|GO:0005215|GO:0005524	chr5	137550940	137550989	GATCCTACGCTCACGGCGTTCCCCTTTACTCAAATCTGGGCCTTTTGGCA
LOC346887	7150491	0.0350085	up	1.71965	0.288277	1.07039	346887	PREDICTED: Homo sapiens similar to solute carrier family 16 (monocarboxylic acid transporters), member 14 (LOC346887), mRNA.							GTCCCGTGGAGGGACACAAGAGCGAGGACAGCATGGTTCTAATGGCCAGG
VSNL1	6100259	0.0495193	up	1.71967	0.906493	1.68863	7447	Homo sapiens visinin-like 1 (VSNL1), mRNA.			GO:0005509|GO:0005509	chr2	17700591	17700640	GAGGGACCCTTGGCTCCTGTGTCTGGTCCACACACCACAGAAGCTTGTAT
NSDHL	4260392	0.0114832	up	1.7208	0.165977	0.949053	50814	Homo sapiens NAD(P) dependent steroid dehydrogenase-like (NSDHL), mRNA.	GO:0001942|GO:0006695|GO:0055114	GO:0005783|GO:0005783|GO:0005789|GO:0016020|GO:0016021	GO:0000252|GO:0003854|GO:0005488|GO:0016491|GO:0047012	chrX	151788331	151788380	TGGGCTCTCTCGACACGTTGCTCAGCCAGTCACTCCTTCCCCTGTGGATT
MDGA1	3800296	0.0197851	up	1.72126	0.146762	0.930223	266727	Homo sapiens MAM domain containing glycosylphosphatidylinositol anchor 1 (MDGA1), mRNA.	GO:0001764|GO:0007275|GO:0007399|GO:0007420|GO:0021527|GO:0030154	GO:0005886|GO:0046658|GO:0016020	GO:0003674	chr6	37708333	37708382	GTCTCCACCCCAGCCTCTGTTCCCCATTTGCCTCTCTTTCACCTCCAAGC
RPS6KA2	5360424	0.032707	up	1.7255	-1.06076	-0.273746	6196	Homo sapiens ribosomal protein S6 kinase, 90kDa, polypeptide 2 (RPS6KA2), transcript variant 2, mRNA.	GO:0006468|GO:0007243|GO:0000089|GO:0001556|GO:0006468|GO:0006468|GO:0007243	GO:0005737|GO:0005819|GO:0005840|GO:0005634|GO:0005654|GO:0005654	GO:0000166|GO:0000287|GO:0004674|GO:0005524|GO:0016740|GO:0004674|GO:0005515|GO:0005524|GO:0000166|GO:0000287|GO:0004674|GO:0004674|GO:0005524|GO:0016740	chr6	166823992	166824041	GCAGCATCTGTGTCGTTCTACTGAGCACGCTTCTCTGCCTCGCTCCTGAC
C10orf39	5960364	0.0158977	up	1.7272	0.5731	1.36154	282973	Homo sapiens chromosome 10 open reading frame 39 (C10orf39), mRNA.				chr10	133848096	133848145	CCCAGGCACTCCCTTCATAGTCACCCTCTAACCACATGACATTCCGTTCC
CDKN2D	7050326	0.0327988	up	1.72784	1.59557	2.38454	1032	Homo sapiens cyclin-dependent kinase inhibitor 2D (p19, inhibits CDK4) (CDKN2D), transcript variant 2, mRNA.	GO:0000079|GO:0000082|GO:0000731|GO:0006916|GO:0007050|GO:0008285|GO:0009411|GO:0030308|GO:0032526|GO:0033280|GO:0042326|GO:0043154|GO:0045786|GO:0048102	GO:0005634|GO:0005634|GO:0005737	GO:0004861|GO:0019901	chr19	10677349	10677398	CTAGAAGCTGGTGGCCTTGGCCGGCTGTGCTCAGAGACCTGAAGTGTGCA
GABRB1	6130692	0.0489636	up	1.72937	1.87917	2.66942	2560	Homo sapiens gamma-aminobutyric acid (GABA) A receptor, beta 1 (GABRB1), mRNA.	GO:0006811|GO:0006811|GO:0007165	GO:0016021|GO:0045211|GO:0005886|GO:0005887|GO:0030054|GO:0045202|GO:0045211	GO:0005230|GO:0004890|GO:0005216|GO:0005230|GO:0005254|GO:0030594|GO:0031404	chr4	47122853	47122902	GGTCCCCAACAGCGATACTGCTGTTTCTCGAGGTAAGAGATTCAGCCATC
PHF19	2570091	0.0463787	up	1.73087	-0.969929	-0.17843	26147	Homo sapiens PHD finger protein 19 (PHF19), transcript variant 1, mRNA.	GO:0006350|GO:0006355	GO:0005634	GO:0003676|GO:0005515|GO:0008270|GO:0003676|GO:0005515|GO:0008270|GO:0046872	chr9	123618110	123618159	GGGGTGTCTGCACCACCTGGGAAGATAGCACAAGGCCTAATGAGGTCACC
TMEM97	3420541	0.029345	up	1.73578	1.39731	2.19289	27346	Homo sapiens transmembrane protein 97 (TMEM97), mRNA.	GO:0001558	GO:0005575|GO:0016020|GO:0016021	GO:0003674	chr17	23679301	23679350	GCTCACAAGCCATATTGGCCCGATTAGTGGTACTGTCTGACTCACGTGTG
RAPGEF5	20148	0.0468951	up	1.7358	2.64679	3.4424	9771	Homo sapiens Rap guanine nucleotide exchange factor (GEF) 5 (RAPGEF5), mRNA.	GO:0007399|GO:0051056	GO:0005622|GO:0005634	GO:0017034|GO:0030742	chr7	22159856	22159905	GAGAACCCGCCATCAGGGTGTCTACCTAACTTCTCAGGGACTACACTTGG
NMNAT2	770070	0.0327464	up	1.73589	2.94449	3.74017	23057	Homo sapiens nicotinamide nucleotide adenylyltransferase 2 (NMNAT2), transcript variant 1, mRNA.	GO:0009058|GO:0009435	GO:0005737	GO:0000309|GO:0016740	chr1	183217576	183217625	GGATCCACATGGTCTTGAGGGTTGGCATGAGGAGGGGGAAGCTTTTTTGA
RGS7	6370386	0.0147912	up	1.73691	1.55505	2.35158	6000	Homo sapiens regulator of G-protein signalling 7 (RGS7), mRNA.	GO:0007186|GO:0007242|GO:0007242|GO:0008277|GO:0009968	GO:0005634|GO:0005730|GO:0005834|GO:0005575|GO:0005634|GO:0005730|GO:0005834	GO:0004871|GO:0004871|GO:0016299				CTCCAATGGACTCTTCCGTCTCAATGCCTCCATTCCAAACTGTTGTCTGC
RHOJ	3440243	0.0297246	up	1.73772	0.298703	1.0959	57381	Homo sapiens ras homolog gene family, member J (RHOJ), mRNA.	GO:0007264|GO:0007266|GO:0008360|GO:0030036|GO:0030036	GO:0005575|GO:0005622|GO:0005886	GO:0000166|GO:0003924|GO:0005515|GO:0005515|GO:0005525	chr14	62827797	62827846	CCCCAGCTCATGAACGTGAAGCTGATAGGAAATCACCCCAGGGAACCCGA
PDGFC	4850327	0.0344858	up	1.73777	-3.10165	-2.30442	56034	Homo sapiens platelet derived growth factor C (PDGFC), mRNA.	GO:0007171|GO:0008284|GO:0009887|GO:0048008|GO:0050730	GO:0005576|GO:0005634|GO:0005737|GO:0016020	GO:0005161|GO:0008083	chr4	157902550	157902599	GATCCAGCCATTACTAACCTATTCCTTTTTTGGGGAAATCTGAGCCTAGC
SHC3	6040689	0.031533	up	1.73789	1.64196	2.4393	53358	Homo sapiens SHC (Src homology 2 domain containing) transforming protein 3 (SHC3), mRNA.	GO:0007173|GO:0007242|GO:0007265|GO:0007417|GO:0007611|GO:0035249	GO:0005575	GO:0004871|GO:0005515|GO:0005515|GO:0005515	chr9	90818099	90818148	AGGTCAGGAGGACCTGGAGTGGACTAGAATCGGGGCTGCTGGAACTGGGA
ZWINT	3800474	0.00768846	up	1.73977	-0.506782	0.292112	11130	Homo sapiens ZW10 interactor (ZWINT), transcript variant 3, mRNA.	GO:0000070|GO:0007049|GO:0007051|GO:0007093|GO:0048015|GO:0051301|GO:0051649	GO:0000777|GO:0005634	GO:0047485	chr10	58118155	58118204	CCTGCTGGAGATGTAAATTTGCCATGACTTCCTGGAGGACAGCAGCATGG
CDKN2B	620487	0.0170447	up	1.74197	-0.813074	-0.0123531	1030	Homo sapiens cyclin-dependent kinase inhibitor 2B (p15, inhibits CDK4) (CDKN2B), transcript variant 2, mRNA.	GO:0000079|GO:0000086|GO:0007050|GO:0030511|GO:0031575|GO:0031668|GO:0031670|GO:0042326|GO:0045786|GO:0050680	GO:0005634|GO:0005737|GO:0005737	GO:0004861|GO:0016301|GO:0004861|GO:0005515|GO:0019901	chr9	22003136	22003185	CCATTTTCGAAGCCACCTGGCAGACAGGTTTAGCTGTTTCATCAGCAGCC
FRMD3	6840767	0.038394	up	1.74622	0.687502	1.49173	257019	Homo sapiens FERM domain containing 3 (FRMD3), mRNA.		GO:0005856|GO:0005737|GO:0005856|GO:0016020|GO:0016021|GO:0019898	GO:0005488|GO:0008092	chr9	85052548	85052597	CAGCAAATGCCTGGTTCTGAAGGGTCACGGGGCTGTCAACAGGTGTTCCT
MAB21L2	2600242	0.0166145	up	1.74654	0.513189	1.31769	10586	Homo sapiens mab-21-like 2 (C. elegans) (MAB21L2), mRNA.	GO:0007275|GO:0007399|GO:0008284|GO:0010172|GO:0043010	GO:0005634		chr4	151724511	151724560	TCGTGCCTGGGCGACCGGCTCAACGGCATCCTGCTGCAGCTCATCTCCTG
SHD	730093	0.0340459	up	1.7467	2.73056	3.53519	56961	Homo sapiens Src homology 2 domain containing transforming protein D (SHD), mRNA.			GO:0005515	chr19	4241648	4241697	CTTTTGAGTCCTCGGGCCCAGAATCGTATCCCAAAGCCCTCCCATGGCCT
TLE2	6560520	0.00874808	up	1.75111	-0.691881	0.116385	7089	Homo sapiens transducin-like enhancer of split 2 (E(sp1) homolog, Drosophila) (TLE2), mRNA.	GO:0045449|GO:0006355|GO:0007165|GO:0009887|GO:0016055	GO:0005634|GO:0005634	GO:0005515	chr19	2948739	2948788	GGACAGACATCCTAGCAGCCGCCTCCCAGCCCTGCCTAGGAACCGTACAT
TYMS	5910364	0.0328188	up	1.75153	-0.102299	0.706313	7298	Homo sapiens thymidylate synthetase (TYMS), mRNA.	GO:0006139|GO:0006231|GO:0006260|GO:0006281|GO:0009157|GO:0009165|GO:0048015|GO:0006231|GO:0006231|GO:0009165	GO:0005829	GO:0004799|GO:0004799|GO:0008168|GO:0016740|GO:0004799|GO:0004799|GO:0008168|GO:0016740	chr18	663033	663082	GGATATTGTCAGTCTTTAGGGGTTGGGCTGGATGCCGAGGTAAAAGTTCT
CDC2	1050706	0.0116437	up	1.75328	0.405924	1.21598	983	Homo sapiens cell division cycle 2, G1 to S and G2 to M (CDC2), transcript variant 1, mRNA.	GO:0006468|GO:0006916|GO:0007049|GO:0007067|GO:0031145|GO:0051301|GO:0051437	GO:0005634|GO:0005634|GO:0005654|GO:0005654|GO:0005654|GO:0005654|GO:0005654|GO:0005654|GO:0005654|GO:0005654|GO:0005737|GO:0005829|GO:0005829|GO:0005829|GO:0005829|GO:0005876|GO:0030496	GO:0000166|GO:0004693|GO:0004693|GO:0005515|GO:0005524|GO:0008353|GO:0016740	chr10	62221918	62221967	GGGCACTCCCAATAATGAAGTGTGGCCAGAAGTGGAATCTTTACAGGACT
STK32B	840670	0.00768846	up	1.75458	-3.47015	-2.65902	55351	Homo sapiens serine/threonine kinase 32B (STK32B), mRNA.	GO:0006468		GO:0000166|GO:0000287|GO:0004674|GO:0005524|GO:0016740	chr4	5501876	5501925	TGGGCTGAGTTCACGAATTAGGGGCAGGAGCTGGAAGTCGCCCTAGGAAC
CDKN2B	7610735	0.0214426	up	1.75686	-0.764924	0.0480722	1030	Homo sapiens cyclin-dependent kinase inhibitor 2B (p15, inhibits CDK4) (CDKN2B), transcript variant 1, mRNA.	GO:0000079|GO:0000086|GO:0007050|GO:0030511|GO:0031575|GO:0031668|GO:0031670|GO:0042326|GO:0045786|GO:0050680	GO:0005634|GO:0005737|GO:0005737	GO:0004861|GO:0016301|GO:0004861|GO:0005515|GO:0019901	chr9	22003923	22003972	GCTGATTATGGTTGTCTTGCTTTTCTTCCCATTGCACCAGCTTGTCCTCC
MGC16384	540484	0.0153898	up	1.75714	0.613622	1.42685	114130	PREDICTED: Homo sapiens hypothetical protein MGC16384 (MGC16384), mRNA.							CATACAGCGGTCAGGTCCATCATACAGCGGTCAGGTCCATCATACGGCGG
MAMDC2	1300470	0.00783209	up	1.75983	1.78924	2.60467	256691	Homo sapiens MAM domain containing 2 (MAMDC2), mRNA.		GO:0005576|GO:0016020		chr9	72031386	72031435	ACAAGGCAATGCTACCTTCTTTATTCCCCCTTTGAACTACCTTTGAAGTC
SEMA4D	4880408	0.00794934	up	1.76108	2.06402	2.88048	10507	Homo sapiens sema domain, immunoglobulin domain (Ig), transmembrane domain (TM) and short cytoplasmic domain, (semaphorin) 4D (SEMA4D), mRNA.	GO:0006916|GO:0006955|GO:0007155|GO:0007275|GO:0007399|GO:0030154|GO:0050772	GO:0016020|GO:0016021	GO:0004872|GO:0005102	chr9	91182226	91182275	GGCGCTGTTCCTGCCACTGTCCTGAAGATGTGAATGGGTGGTACGATTTC
LOC649722	4850341	0.0211268	up	1.76146	0.22298	1.03975	649722	PREDICTED: Homo sapiens similar to dual specificity phosphatase 5 (LOC649722), mRNA.							CAATGGAGGCCTTTTGGTGCTTACCACAGACTGTGCTCTTTCACTGACTG
PDGFB	5390615	0.0423699	up	1.76158	0.43621	1.25308	5155	Homo sapiens platelet-derived growth factor beta polypeptide (simian sarcoma viral (v-sis) oncogene homolog) (PDGFB), transcript variant 2, mRNA.	GO:0001938|GO:0006929|GO:0008283|GO:0030031|GO:0030036|GO:0030336|GO:0050730|GO:0001938|GO:0006929|GO:0009611|GO:0010512|GO:0010544|GO:0014911|GO:0030031|GO:0030036|GO:0030336|GO:0043406|GO:0043536|GO:0045740|GO:0045740|GO:0048008|GO:0048008|GO:0048008|GO:0048146|GO:0050730|GO:0050921	GO:0016020|GO:0005576|GO:0005576|GO:0009986|GO:0009986|GO:0009986|GO:0016020|GO:0031089	GO:0008083|GO:0005161|GO:0005515|GO:0008083|GO:0042803|GO:0043498|GO:0043498|GO:0043498|GO:0046982|GO:0048407	chr22	37950308	37950357	GGGACCTGCTCATCATATTCCAACCCAGCCACGACTGCCATGTAAGGTTG
CSRP1	6370397	0.0100785	up	1.76215	-4.56931	-3.75197	1465	Homo sapiens cysteine and glycine-rich protein 1 (CSRP1), mRNA.		GO:0005634	GO:0005515|GO:0008270|GO:0046872	chr1	199719534	199719583	GCACTGCCTCAGTCTTCATCCAAACACCTTTCCCTTTGCCCTGAGACCTC
CDT1	2630433	0.0107609	up	1.76331	0.861292	1.67958	81620	Homo sapiens chromatin licensing and DNA replication factor 1 (CDT1), mRNA.	GO:0000076|GO:0006260|GO:0007049|GO:0007090|GO:0030174	GO:0005634|GO:0005654|GO:0005654|GO:0005654|GO:0005654|GO:0005654|GO:0005657	GO:0003677|GO:0005515	chr16	87403077	87403126	GAGCCTCCAGAAGGGACTGGCCTCTGCCCACACCTTGACTTCAGTATTTC
MFGE8	5560075	0.0124379	up	1.76333	-1.54784	-0.729538	4240	Homo sapiens milk fat globule-EGF factor 8 protein (MFGE8), mRNA.	GO:0007155|GO:0007155|GO:0007338|GO:0044419	GO:0005737|GO:0016020	GO:0005515	chr15	87242940	87242989	GGGCCCTCATGCTGGCTTTTCACCCCAGAGGACACAGGCAGCTTCCAAAA
IGSF11	5270102	0.00238896	up	1.76405	2.47223	3.29112	152404	Homo sapiens immunoglobulin superfamily, member 11 (IGSF11), transcript variant 2, mRNA.	GO:0001558|GO:0007155	GO:0005886|GO:0016021	GO:0004872|GO:0005515	chr3	120102495	120102544	CTCTTCTCCTGCAAGCGTAGTCTTCACAGGGAGTGGCTTCCTGACATTTT
OSR1	3940500	0.0113701	up	1.76482	-3.65568	-2.83616	130497	Homo sapiens odd-skipped related 1 (Drosophila) (OSR1), mRNA.	GO:0001656|GO:0007507|GO:0008406|GO:0048389	GO:0005622|GO:0005634	GO:0003676|GO:0008270|GO:0046872	chr2	19551312	19551361	GCCAAGAGCCGGGCGTTATATTGCGATTGGCACTTTATGCTGACCATCGG
EGR2	6020255	0.020251	up	1.76723	0.241333	1.06282	1959	Homo sapiens early growth response 2 (Krox-20 homolog, Drosophila) (EGR2), mRNA.	GO:0006350|GO:0006355|GO:0007420|GO:0007422|GO:0007638	GO:0005622|GO:0005634	GO:0003700|GO:0005515|GO:0008270|GO:0046872	chr10	64242090	64242139	GCATGCAATTGTGTTGGAAGTGTCCTTGGTCGCCTTGTGTGATGTAGACA
INA	1230538	0.047728	up	1.76816	6.75581	7.57806	9118	Homo sapiens internexin neuronal intermediate filament protein, alpha (INA), mRNA.	GO:0007275|GO:0007399|GO:0030154|GO:0060052	GO:0005883	GO:0005200	chr10	105039760	105039809	GGACAGTCAGCTCTTCATCTGCCCAACTGTGTAGCATCTGCATTGCCCAG
LZTS1	3520735	0.0359274	up	1.77005	0.44677	1.27056	11178	Homo sapiens leucine zipper, putative tumor suppressor 1 (LZTS1), mRNA.	GO:0006350|GO:0006355|GO:0045786	GO:0005634|GO:0005737|GO:0005794|GO:0005886|GO:0030054|GO:0042995|GO:0045202|GO:0045211	GO:0003700|GO:0005515	chr8	20148170	20148219	GGGCTGCTCACCCACCTCTTGTGCAAGGTGGCCTTTGTGCTGCGCCTGCA
DLGAP5	240221	0.0256201	up	1.77045	-0.425204	0.398911	9787	Homo sapiens discs, large (Drosophila) homolog-associated protein 5 (DLGAP5), mRNA.	GO:0000087|GO:0007049|GO:0007079|GO:0007267|GO:0008283|GO:0045842	GO:0005634|GO:0005737|GO:0031616	GO:0004721|GO:0005515	chr14	54684927	54687301	AGTCTCACTACTGAATGCCACCTTCTTGATTCACCAGGTCTAAACTGCAG
LOC387856	4850189	0.0344164	up	1.77053	4.93819	5.76237	387856	Homo sapiens similar to expressed sequence AI836003 (LOC387856), mRNA.				chr12	46865820	46865869	GGGCATGGAGCATGTGGCTGTCCTGAGGTTCTTTTACTGATGTGCCGCCC
LYSMD4	7210487	0.0376928	up	1.77188	-0.0448202	0.780465	145748	Homo sapiens LysM, putative peptidoglycan-binding, domain containing 4 (LYSMD4), mRNA.	GO:0016998	GO:0016020|GO:0016021		chr15	100267703	100267752	GGGCCACAGGTTCCTCTAACATCTGTCACTGTCACTTCACCAGGCAGGCC
RHOJ	6100450	0.0153913	up	1.77327	0.0469929	0.873401	57381	Homo sapiens ras homolog gene family, member J (RHOJ), mRNA.	GO:0007264|GO:0007266|GO:0008360|GO:0030036|GO:0030036	GO:0005575|GO:0005622|GO:0005886	GO:0000166|GO:0003924|GO:0005515|GO:0005515|GO:0005525	chr14	62828071	62828120	GCATGTTTCTACCAAAGCTATTAGAACCAACACGTACCTCTGAATGCCCG
ELAVL4	5270142	0.0277058	up	1.77431	2.18872	3.01598	1996	Homo sapiens ELAV (embryonic lethal, abnormal vision, Drosophila)-like 4 (Hu antigen D) (ELAVL4), mRNA.	GO:0006397		GO:0000166|GO:0003723|GO:0000166|GO:0003723|GO:0000166|GO:0003723|GO:0000166|GO:0003723|GO:0000166|GO:0003723|GO:0003730	chr1	50439230	50439279	CCTCTGGCAGCTCTTTGGCCCCTTTGGAGCAGTGAACAACGTAAAGGTGA
CAPRIN2	1980202	0.00768846	up	1.77786	-0.0269276	0.803215	65981	Homo sapiens caprin family member 2 (CAPRIN2), transcript variant 1, mRNA.	GO:0030308	GO:0005737|GO:0005739		chr12	30862893	30862942	CAGCTCTTCCAGGGAGACCAGATATGGTTACGTCTGCACAGGGGAGCAAT
IGFBP2	4200674	0.0305613	up	1.7802	4.48202	5.31406	3485	Homo sapiens insulin-like growth factor binding protein 2, 36kDa (IGFBP2), mRNA.	GO:0001558	GO:0005576|GO:0005615	GO:0005520	chr2	217237127	217237176	CAAACACCGGCAGAAAACGGAGAGTGCTTGGGTGGTGGGTGCTGGAGGAT
ACTL6B	5390008	0.0179322	up	1.78219	2.002	2.83565	51412	Homo sapiens actin-like 6B (ACTL6B), mRNA.	GO:0006325|GO:0006508	GO:0005634|GO:0016514	GO:0004190|GO:0005200|GO:0005515|GO:0005524	chr7	100078755	100078804	ATGGCACTCCTCCCCACACACCTGCTCCCAAGCTCAGATGGAAGTCCCTT
SH3PXD2A	3460451	0.0153898	up	1.78361	-3.61832	-2.78352	9644	Homo sapiens SH3 and PX domains 2A (SH3PXD2A), mRNA.	GO:0007154	GO:0005737|GO:0042995	GO:0005515|GO:0035091	chr10	105355400	105355449	CCCTTGGCCTGCCACTTTCCAGGTGTCCTTTATCACTTTGACGGGACTCT
CALD1	620750	0.0381179	up	1.78492	-2.76667	-1.93081	800	Homo sapiens caldesmon 1 (CALD1), transcript variant 5, mRNA.	GO:0006928|GO:0006936	GO:0005856	GO:0003779|GO:0005516|GO:0005523|GO:0017022	chr7	134305484	134305533	GTGTCCCAGGTAGCATTGACTCCCGTCATTGGAGTGAAATGGATCAAAGT
PHLDB1	5130093	0.0355268	up	1.7856	0.0937201	0.930127	23187	Homo sapiens pleckstrin homology-like domain, family B, member 1 (PHLDB1), mRNA.				chr11	118033827	118033876	ACTAAGCCCACCTCCCCTGCTCTCCTTCCCAGCATTGAGCCCTTGGTTGC
TGFBR3	3190379	0.0138558	up	1.78717	-4.00809	-3.17042	7049	Homo sapiens transforming growth factor, beta receptor III (TGFBR3), mRNA.	GO:0001837|GO:0003007|GO:0006955|GO:0007179|GO:0007179|GO:0007243|GO:0016049|GO:0016477|GO:0030509|GO:0032354|GO:0051271	GO:0005576|GO:0005615|GO:0005886|GO:0005887|GO:0009897|GO:0043231	GO:0005024|GO:0005114|GO:0005515|GO:0005515|GO:0005515|GO:0005515|GO:0005515|GO:0005515|GO:0008201|GO:0015026|GO:0050431|GO:0050431	chr1	91920750	91920799	TGCATGGCAAATCCTGTCGGTCTCCAGTTGGTTATCTGAATAGTGTCACC
PPP1R1C	3940561	0.0276781	up	1.78718	0.702044	1.53973	151242	Homo sapiens protein phosphatase 1, regulatory (inhibitor) subunit 1C (PPP1R1C), mRNA.	GO:0007165	GO:0005737	GO:0004864	chr2	182559110	182559159	CAGTTTGCCGTGCCTGTATTCCAGAGTCAGATTGCACCTGAAGCAGCAGA
PHACTR2	6980113	0.0114832	up	1.78735	-3.52384	-2.68602	9749	Homo sapiens phosphatase and actin regulator 2 (PHACTR2), transcript variant 1, mRNA.			GO:0003779|GO:0004864	chr6	144144829	144144878	TGCATGCCCAGGTGTCTGTCTCTGGCTGAGGTTTTGTCTATTTTACAGTG
PRKCA	6560564	0.049128	up	1.7941	-1.525	-0.681746	5578	Homo sapiens protein kinase C, alpha (PRKCA), mRNA.	GO:0007242|GO:0007242|GO:0000188|GO:0001933|GO:0001934|GO:0002026|GO:0002062|GO:0006469|GO:0006874|GO:0006937|GO:0007242|GO:0008624|GO:0008629|GO:0030593|GO:0046325|GO:0046627|GO:0050729|GO:0050730|GO:0050930	GO:0005624|GO:0005634|GO:0005737|GO:0005739|GO:0005829|GO:0005829|GO:0005886|GO:0005886|GO:0005886	GO:0008270|GO:0016301|GO:0046872|GO:0008270|GO:0019992|GO:0046872|GO:0000166|GO:0004698|GO:0005509|GO:0005515|GO:0005524|GO:0008270|GO:0016740|GO:0019992	chr17	62237082	62237131	GGAGGAAGAGACGGAGGTTGAGGTTTTTCCTTCTGTATAAGCACCTACTG
NACC2	630706	0.0108118	up	1.79468	0.413043	1.25677	138151	Homo sapiens NACC family member 2, BEN and BTB (POZ) domain containing (NACC2), mRNA.				chr9	138903302	138903351	GGTGGCTGCGCGAGGGACCGAGTACTAGAGCTGCTTGCATGCGTTACTAA
NPAS1	2900373	0.0107609	up	1.7956	-1.49241	-0.647948	4861	Homo sapiens neuronal PAS domain protein 1 (NPAS1), mRNA.	GO:0000122|GO:0006355|GO:0007165|GO:0007417|GO:0007610	GO:0005634	GO:0003700|GO:0004871	chr19	47548951	47549000	GGTCCCCCAGGACAGTAGGCCCGGCTCTGCCCGTAGCCCTGAGAATTAAA
SV2A	7550167	0.043157	up	1.80089	1.74563	2.59433	9900	Homo sapiens synaptic vesicle glycoprotein 2A (SV2A), mRNA.	GO:0006836|GO:0006874	GO:0005737|GO:0005783|GO:0008021|GO:0016020|GO:0016021|GO:0030054|GO:0031410|GO:0045202	GO:0005215	chr1	148141936	148141985	GGTTAGGCTGCCCCATCCCACCCTACTCTGTGTGGCTGCTTTCTTTGGTG
COL4A1	5910431	0.0214426	up	1.80226	-0.276416	0.573389	1282	Homo sapiens collagen, type IV, alpha 1 (COL4A1), mRNA.		GO:0005581|GO:0005587|GO:0005576|GO:0005581|GO:0005604	GO:0005201|GO:0005488|GO:0005201|GO:0005488	chr13	110801522	110801571	CATCGCATGGACCGCAGGAGGGCAGATTCGGACCACTAGGCCTGAAATGA
TMEM37	6330112	0.0164316	up	1.80453	0.907722	1.75935	140738	Homo sapiens transmembrane protein 37 (TMEM37), mRNA.	GO:0006811|GO:0006816	GO:0016020|GO:0016021	GO:0005244|GO:0005262|GO:0005509	chr2	119911214	119911263	GCCGCCATTTTTGGCCTGGAGTTCCTCATGGTGTCCCAGTTGTGCGAGGA
FBLN5	4670441	0.0184806	up	1.80892	-5.29528	-4.44014	10516	Homo sapiens fibulin 5 (FBLN5), mRNA.	GO:0007155|GO:0007160	GO:0005576|GO:0005578|GO:0005625|GO:0005737	GO:0005178|GO:0005509|GO:0005515	chr14	91405850	91405899	GCTGGCGGGGAACCCTGGGAGTAGCTAGTTTGCTTTTTGCGTACACAGAG
BCAR3	4070053	0.0147912	up	1.81219	-1.89453	-1.0368	8412	Homo sapiens breast cancer anti-estrogen resistance 3 (BCAR3), mRNA.	GO:0007165|GO:0007264|GO:0042493	GO:0005622	GO:0005085|GO:0005515	chr1	94027798	94027847	GCCCTCTCGCGTAAATTGGAACCTCCTCCTGTAAAGCAGGCAGAGCTTTG
SHROOM2	7550324	0.0377176	up	1.81226	3.25546	4.11325	357	Homo sapiens shroom family member 2 (SHROOM2), mRNA.	GO:0000902|GO:0002089|GO:0007275|GO:0007420|GO:0008057|GO:0016477|GO:0032401|GO:0032438|GO:0043482|GO:0043583|GO:0045176|GO:0051017	GO:0005737|GO:0005856|GO:0005874|GO:0005886|GO:0005913|GO:0005923|GO:0016324|GO:0030054|GO:0030864	GO:0008013|GO:0015280|GO:0051015	chrX	9866231	9866280	CCTGTCAGTTCCCCTGTTTGCCTCTGAAACGTCTGGTTAGTGGGGACCCA
KIAA1737	7050204	0.00768846	up	1.81467	1.58229	2.442	85457	Homo sapiens KIAA1737 (KIAA1737), mRNA.		GO:0005634|GO:0005737		chr14	76652899	76652948	CGGAGGTGACCAGAAAGATCTCCATCGGTTGCCCAAGGCTGTAAGTAGTG
SRGAP2	990072	0.0377133	up	1.81524	0.0528994	0.913058	23380	Homo sapiens SLIT-ROBO Rho GTPase activating protein 2 (SRGAP2), transcript variant 1, mRNA.	GO:0007165|GO:0007165	GO:0005622|GO:0005743|GO:0005622|GO:0005743	GO:0005096|GO:0005515|GO:0005515	chr1	204704367	206516205	AGCAGCCTGTAAACTGGAAACACTGGTCTCAGCCAACCTCCTCAGGGCGC
AK5	6270148	0.0260886	up	1.81627	-2.55901	-1.69803	26289	Homo sapiens adenylate kinase 5 (AK5), transcript variant 2, mRNA.	GO:0006139|GO:0006172|GO:0006173|GO:0009220|GO:0046034|GO:0006139	GO:0005737|GO:0005829|GO:0005829	GO:0000166|GO:0004017|GO:0005524|GO:0016740|GO:0019206|GO:0005524|GO:0016740|GO:0019205	chr1	77759638	77760141	GGGCCCTTTCCAGGAGTTTGCAAACCTTGTCATACCCATATGCAAAACTG
NUSAP1	1500553	0.0109796	up	1.81881	0.96054	1.82354	51203	Homo sapiens nucleolar and spindle associated protein 1 (NUSAP1), transcript variant 2, mRNA.	GO:0000281|GO:0007049|GO:0007076|GO:0040001|GO:0045840|GO:0051301	GO:0005634|GO:0005737|GO:0005874	GO:0003677	chr15	39460433	39460482	CTAGGCTTTGCTTAGTATCATGTCCATGTTTCCTTCACCTCAGTGGAGCT
GRIN3A	3400632	0.0140281	up	1.82056	0.760543	1.62492	116443	Homo sapiens glutamate receptor, ionotropic, N-methyl-D-aspartate 3A (GRIN3A), mRNA.	GO:0006811|GO:0006816|GO:0016358|GO:0045471|GO:0045471|GO:0060134|GO:0006811|GO:0006816|GO:0016358|GO:0060134	GO:0005886|GO:0016021|GO:0017146|GO:0030054|GO:0043005|GO:0043025|GO:0045202|GO:0045211|GO:0016021|GO:0030054|GO:0043025|GO:0045202|GO:0045211	GO:0000287|GO:0004872|GO:0004972|GO:0004972|GO:0005216|GO:0005234|GO:0005262|GO:0005509|GO:0016594|GO:0042802|GO:0051721|GO:0004872|GO:0004972|GO:0005216|GO:0005234|GO:0005262|GO:0005515	chr9	103371569	103371618	CCGCTCCAGGAAGAACGGAAATGCTGTCTTGTGAGCATGAAGTGAACGGG
PARM1	1240037	0.0158977	up	1.82268	4.31188	5.17793	25849	Homo sapiens prostate androgen-regulated mucin-like protein 1 (PARM1), mRNA.				chr4	75974952	75975001	GCCCTTCATCTTGCTTGCAAGTGTGCATGGTTCAATCCCTCACATCCAGG
DIDO1	5390707	0.0326403	up	1.82403	0.338813	1.20595	11083	Homo sapiens death inducer-obliterator 1 (DIDO1), transcript variant 3, mRNA.				chr20	61518826	61518875	GGGCAGGAGGAAACACCGCCCTCTGTAGCTGCTCGAATGGAAAGGGCTCT
ACOT7	4290050	0.0271931	up	1.82524	1.04082	1.90891	11332	Homo sapiens acyl-CoA thioesterase 7 (ACOT7), transcript variant hBACHb, mRNA.	GO:0006629	GO:0005737|GO:0005739	GO:0000062|GO:0004091|GO:0016290|GO:0016787	chr1	6332432	6332481	CCGAGCACGCTGTAGGGTATGGGAAGAACCCAGCACCACTAATAAAGCTG
PODXL	1850092	0.0349818	up	1.82586	1.16986	2.03843	5420	Homo sapiens podocalyxin-like (PODXL), transcript variant 1, mRNA.	GO:0050900	GO:0005886|GO:0005887|GO:0016020		chr7	130835794	130835843	GTCACGGTCACTAGCTGATCCCTCAGGTCTGCTGCAAACACAGCATGGAG
SEMA5A	4210215	0.0176294	up	1.82704	-0.996182	-0.12667	9037	Homo sapiens sema domain, seven thrombospondin repeats (type 1 and type 1-like), transmembrane domain (TM) and short cytoplasmic domain, (semaphorin) 5A (SEMA5A), mRNA.	GO:0001569|GO:0007155|GO:0007267|GO:0007275|GO:0007399|GO:0007411|GO:0030154	GO:0016020|GO:0016021|GO:0043231	GO:0004872|GO:0008046	chr5	9091284	9091333	CACCTAACCAATCAATGGAAGGCAACTCACACCTGCTCCAAGCCTCAGCT
CCND2	1570348	0.0153913	up	1.83186	5.07492	5.94823	894	Homo sapiens cyclin D2 (CCND2), mRNA.	GO:0001934|GO:0045737|GO:0051301|GO:0051726	GO:0000307|GO:0005634	GO:0005515|GO:0019901	chr12	4284268	4284317	AACTGCTGGCCAACTCTTACATCCCCAGCAAATCATCGGGCCATTGGATT
TMEM45A	4610341	0.0164316	up	1.83294	-2.65581	-1.78165	55076	Homo sapiens transmembrane protein 45A (TMEM45A), mRNA.		GO:0016020|GO:0016021		chr3	100277415	100287696	GGGGAGCTGGTTCTTTCAGATTGGATTTGTCCTGTATCCCCCCAGTGGAG
LAMC1	4120086	0.0212558	up	1.83481	-2.81068	-1.93505	3915	Homo sapiens laminin, gamma 1 (formerly LAMB2) (LAMC1), mRNA.	GO:0006461|GO:0007155|GO:0007492|GO:0016477|GO:0022617|GO:0031581|GO:0050679	GO:0005576|GO:0005605|GO:0005606|GO:0005737|GO:0005783|GO:0005886|GO:0043259	GO:0005201|GO:0005515	chr1	181381199	181381248	TATGTGCCTTCACTTTAGCTGTTTGCCTTACTCTACAGCCTTGCTCTCCG
KIFC1	7330674	0.00949059	up	1.83554	0.96583	1.84204	3833	Homo sapiens kinesin family member C1 (KIFC1), mRNA.	GO:0000070|GO:0007018|GO:0007049|GO:0051301	GO:0005634|GO:0005769|GO:0005813|GO:0005819|GO:0005874|GO:0005875	GO:0000166|GO:0003777|GO:0005524	chr6	33482588	33485407	GAACGTCTCCGAGTCCCTCAACTCTCTACGCTTTGCCTCCAAGGTGAACC
VWC2	7550059	0.00764478	up	1.83584	1.41942	2.29587	375567	Homo sapiens von Willebrand factor C domain containing 2 (VWC2), mRNA.	GO:0030514|GO:0045666	GO:0005576|GO:0005615		chr7	49922248	49922297	GCCACTGTACTTATGAGGAAGGCACATGGAGAATCGAGCGGCAGGCCATG
EHD4	6400647	0.0213767	up	1.83886	-2.37012	-1.49131	30844	Homo sapiens EH-domain containing 4 (EHD4), mRNA.		GO:0005634|GO:0005783	GO:0000166|GO:0003676|GO:0003924|GO:0005509|GO:0005515|GO:0005524|GO:0005525	chr15	39979119	39979168	TCAATCAAATCCTGTCCTAGTGTGTGCAGTGTCTTCGGCCCTGTGGACAC
CA8	1850097	0.0361897	up	1.83971	0.975132	1.85461	767	Homo sapiens carbonic anhydrase VIII (CA8), mRNA.	GO:0006730|GO:0048015	GO:0005737	GO:0004089|GO:0005515|GO:0008270|GO:0046872	chr8	61264161	61264210	AGGTGCCACTAGCAGATGTAAGCGTATACTTAGTTGCCGTTAGATGTGAC
UNC5A	1980634	0.0497927	up	1.84634	0.842954	1.72762	90249	Homo sapiens unc-5 homolog A (C. elegans) (UNC5A), mRNA.	GO:0006915|GO:0007165|GO:0007275|GO:0007165	GO:0005886|GO:0016021	GO:0004872|GO:0005515|GO:0005515	chr5	176240133	176240182	GCATTCACGCACTTACTCTTGGCCTTATGTACACAGCCTTGCCCGGCCGC
B3GALNT1	1410370	0.0344503	up	1.84641	-0.386684	0.498041	8706	Homo sapiens beta-1,3-N-acetylgalactosaminyltransferase 1 (globoside blood group) (B3GALNT1), transcript variant 2, mRNA.	GO:0006486|GO:0009312	GO:0000139|GO:0005794|GO:0016020|GO:0016021	GO:0000287|GO:0008378|GO:0008499|GO:0016757|GO:0047273	chr3	162285008	162285057	CTGCTAATAGTAGGTCAAAGGGGAGCACTCCTTGCCCCCTGTTCCTGGGT
RHOU	1230470	0.0147912	up	1.84666	0.714499	1.59942	58480	Homo sapiens ras homolog gene family, member U (RHOU), mRNA.	GO:0000082|GO:0007264|GO:0008360|GO:0016601|GO:0030036	GO:0000139|GO:0005622|GO:0005794|GO:0005886|GO:0030054|GO:0042995	GO:0000166|GO:0000287|GO:0003924|GO:0005515|GO:0005515|GO:0005525	chr1	226948891	226948940	GCAAGGCCTTCTCTCCAGACTATCGTAACCTGGTGCCTTACCAAGTTGTG
INSIG1	360192	0.0373242	up	1.84713	-0.821673	0.0636148	3638	Homo sapiens insulin induced gene 1 (INSIG1), transcript variant 2, mRNA.	GO:0006629|GO:0008152|GO:0008202|GO:0008203|GO:0008283|GO:0006991	GO:0005783|GO:0005789|GO:0016020|GO:0016021	GO:0005515|GO:0005515	chr7	154732260	154732309	CCACCAGTCAGCAGAATGGAAGCTTAGAGGAACTTGCCTGTGAGCGCTGG
JUB	2000167	0.0194512	up	1.84829	-0.903591	-0.0174039	84962	Homo sapiens jub, ajuba homolog (Xenopus laevis) (JUB), transcript variant 1, mRNA.	GO:0006810|GO:0007049|GO:0007155|GO:0030032|GO:0030334|GO:0035313|GO:0043087|GO:0048041|GO:0030032|GO:0030334|GO:0035313|GO:0043087|GO:0048041	GO:0005634|GO:0005737|GO:0005813|GO:0005856|GO:0005886|GO:0005925|GO:0030027|GO:0030054|GO:0005925|GO:0030027	GO:0005215|GO:0005515|GO:0008270|GO:0046872|GO:0005515|GO:0008270|GO:0046872	chr14	23440578	23440627	ATTTCCACATTTGGGGGCTATTCTAAGGTGACTATGCCAGCCAACCTGGG
GPR22	6380273	0.0140669	up	1.84939	0.215075	1.10212	2845	Homo sapiens G protein-coupled receptor 22 (GPR22), mRNA.	GO:0007165|GO:0007186	GO:0005886|GO:0005887	GO:0004872	chr7	106902619	106902668	CCCTCCGGCGAGCTGTGAAACGACACCGTGAACGACGAGAAAGACAAAAG
IGFBP5	2190674	0.0269542	up	1.85005	-1.0321	-0.144538	3488	Homo sapiens insulin-like growth factor binding protein 5 (IGFBP5), mRNA.	GO:0001558|GO:0007165|GO:0014912|GO:0043569|GO:0048662	GO:0005783|GO:0005576|GO:0016942	GO:0031994	chr2	217245529	217245578	GCACAGTTGTCAGACAAGATTCCTTCAGATTCCGAGTTGCCTACCGGTTG
FAT1	5390164	0.0153898	up	1.85362	0.0258271	0.916173	2195	Homo sapiens FAT tumor suppressor homolog 1 (Drosophila) (FAT1), mRNA.				chr4	187746527	187746576	CCCAACTACTGTCATCGTGAGGTTTTCATCGGCTGTGCCATTTCCCAACG
MYH9	6620136	0.0176294	up	1.85713	-3.52013	-2.62706	4627	Homo sapiens myosin, heavy chain 9, non-muscle (MYH9), mRNA.	GO:0000212|GO:0000904|GO:0001701|GO:0001768|GO:0006928|GO:0007132|GO:0007520|GO:0008360|GO:0016337|GO:0032796|GO:0051295|GO:0000212|GO:0000904|GO:0000910|GO:0001525|GO:0001701|GO:0001768|GO:0006509|GO:0006928|GO:0007132|GO:0007229|GO:0007520|GO:0007605|GO:0008360|GO:0015031|GO:0016337|GO:0030048|GO:0030220|GO:0030224|GO:0031532|GO:0032796|GO:0043534|GO:0050900|GO:0051295	GO:0001725|GO:0001772|GO:0001931|GO:0005737|GO:0005819|GO:0005886|GO:0005913|GO:0005938|GO:0016459|GO:0030863|GO:0031594|GO:0016459|GO:0001725|GO:0001725|GO:0001725|GO:0001725|GO:0001726|GO:0001772|GO:0001931|GO:0005634|GO:0005737|GO:0005819|GO:0005826|GO:0005829|GO:0005886|GO:0005886|GO:0005913|GO:0005938|GO:0008305|GO:0016459|GO:0030863|GO:0031594|GO:0032154|GO:0032154	GO:0003774|GO:0005515|GO:0005524|GO:0051015|GO:0003774|GO:0003779|GO:0005524|GO:0000146|GO:0000166|GO:0005516|GO:0005524|GO:0005524|GO:0016887|GO:0030898|GO:0030898|GO:0042803|GO:0043495|GO:0043531|GO:0051015|GO:0051015|GO:0051015	chr22	35007690	35007739	CTAGGACTGGGCCCGAGGGTGGTTTACCTGCACCGTTGACTCAGTATAGT
IGFBP3	6590132	0.0256295	up	1.8622	-7.71788	-6.82087	3486	Homo sapiens insulin-like growth factor binding protein 3 (IGFBP3), transcript variant 2, mRNA.	GO:0001558|GO:0001933|GO:0009968|GO:0014912|GO:0043065|GO:0045663|GO:0048662	GO:0005576|GO:0005634|GO:0016942	GO:0008160|GO:0031994|GO:0046872	chr7	45952202	45952251	GATACAACTGTGGCCATGACTGAGGAAAGGAGCTCACGCCCAGAGACTGG
ACAT2	7330753	0.0140352	up	1.86623	0.861991	1.76212	39	Homo sapiens acetyl-Coenzyme A acetyltransferase 2 (ACAT2), mRNA.	GO:0006629|GO:0008152	GO:0005737	GO:0003985|GO:0005515|GO:0008415|GO:0016740	chr6	160118390	160118439	CACCTTTAGCACGGATAGTTTCCTGGTCCCAAGTGGGTGTGGAGCCTTCC
DDX12	3780170	0.0340459	up	1.87236	1.53625	2.4411	440081	PREDICTED: Homo sapiens DEAD/H (Asp-Glu-Ala-Asp/His) box polypeptide 12 (CHL1-like helicase homolog, S. cerevisiae), transcript variant 17 (DDX12), mRNA.	GO:0006139|GO:0007049	GO:0005634	GO:0000166|GO:0003677|GO:0003723|GO:0004003|GO:0005524|GO:0016787|GO:0016818	chr12	9465776	9465825	CAGACTTCTCGCTTCCTTTCTGCTGGGCCTCTGAGGGGTCATGGGGCCAT
CHN2	3190246	0.0197851	up	1.88148	2.53805	3.44992	1124	Homo sapiens chimerin (chimaerin) 2 (CHN2), transcript variant 2, mRNA.	GO:0007242|GO:0007242|GO:0007242|GO:0007242|GO:0007242|GO:0007242|GO:0007242|GO:0007242|GO:0007165|GO:0007165|GO:0007165|GO:0007242	GO:0005622|GO:0005622|GO:0005622|GO:0005622|GO:0005622|GO:0005622|GO:0005622|GO:0005622|GO:0005622|GO:0005622|GO:0005622|GO:0005622|GO:0016020	GO:0005515|GO:0005515|GO:0005070|GO:0005096|GO:0005515|GO:0008270|GO:0019992|GO:0046872	chr7	29519248	29519297	CCATTGGCACAGGGAGGTTTGACCTCTTCCCTGCTATTATCCCTCCTCCC
ARHGAP19	6110332	0.0158977	up	1.88511	1.81961	2.73425	84986	Homo sapiens Rho GTPase activating protein 19 (ARHGAP19), mRNA.	GO:0007165	GO:0005622|GO:0005634	GO:0005096	chr10	98983559	98983608	GGCCAGCGAGGAGGTGTGGGACATAATAGCCTGAGTGCTTGGGTTACCAT
BRUNOL4	1990112	0.0131002	up	1.88698	1.00673	1.92281	56853	PREDICTED: Homo sapiens bruno-like 4, RNA binding protein (Drosophila) (BRUNOL4), mRNA.	GO:0007281|GO:0009790	GO:0005634|GO:0005737	GO:0000166|GO:0000900|GO:0042835|GO:0003676				TTAGCAAACGGACAGGCTGACAACGCAAGCCTCAGTACCAACGGGCTCGG
SGK1	2030324	0.0429933	up	1.88711	-3.31954	-2.40336	6446	Homo sapiens serum/glucocorticoid regulated kinase 1 (SGK1), transcript variant 1, mRNA.	GO:0006468|GO:0006468|GO:0006974|GO:0006468|GO:0006468|GO:0006814|GO:0006915|GO:0006950	GO:0005634|GO:0005737|GO:0005783	GO:0000166|GO:0004674|GO:0005524|GO:0016740|GO:0000166|GO:0004674|GO:0005515|GO:0005524|GO:0016740|GO:0000166|GO:0004674|GO:0005524|GO:0016740|GO:0000166|GO:0004674|GO:0005515|GO:0005524|GO:0016740	chr6	134490933	134490982	CCTTGTGGATATGCTGTGTGAACCGTCGTGTGAGTGTGGTATGCCTGATC
SORCS1	2100706	0.0231188	up	1.88982	1.38545	2.30369	114815	Homo sapiens sortilin-related VPS10 domain containing receptor 1 (SORCS1), transcript variant 2, mRNA.	GO:0007218	GO:0016020|GO:0016021	GO:0005515|GO:0005515|GO:0008188	chr10	108338955	108339004	GCAACTTTGAGAGCAGTGGGGTGCTTGGCAGCTGTTCTGTGTTTTCCAGG
PPP1R13B	3420228	0.0399454	up	1.8957	0.291342	1.21407	23368	Homo sapiens protein phosphatase 1, regulatory (inhibitor) subunit 13B (PPP1R13B), mRNA.	GO:0006915|GO:0006917|GO:0045786	GO:0005634|GO:0005737	GO:0005515|GO:0005515|GO:0005515	chr14	104200106	104200155	ATGGCCGCTGCCAGCCCAGACGCTGCTGACGCTGTGTAAATGTGCACAAT
C6orf155	20121	0.00783209	up	1.89805	1.02086	1.94538	79940	Homo sapiens chromosome 6 open reading frame 155 (C6orf155), mRNA.				chr6	72181166	72181215	CTAAGACGGATACCCCTGAATTAAGAGGTGCTGTTATACATTGACCAGGC
ADD3	1010477	0.0153913	up	1.90036	1.91516	2.84143	120	Homo sapiens adducin 3 (gamma) (ADD3), transcript variant 1, mRNA.		GO:0005737|GO:0005856|GO:0005886|GO:0016020	GO:0003779|GO:0005198|GO:0005200|GO:0005516|GO:0046872	chr10	111872576	111872625	GATGACGCTTCATCTGTTTCACAAATTCAGTCTCAAACTCAGTCACCGCA
OLFM3	840494	0.0407456	up	1.90178	0.890752	1.81811	118427	Homo sapiens olfactomedin 3 (OLFM3), mRNA.				chr1	102041488	102041537	CTCTGTTCACTCCACTGAATGCAACCCATATAGTTTCTTGCACAAGGTGC
SLC7A5	270152	0.0376432	up	1.90697	-1.61364	-0.682351	8140	Homo sapiens solute carrier family 7 (cationic amino acid transporter, y+ system), member 5 (SLC7A5), mRNA.	GO:0006520|GO:0006810|GO:0007275|GO:0007399|GO:0015804|GO:0015807|GO:0030154	GO:0005737|GO:0005886|GO:0016021|GO:0016324	GO:0015175|GO:0015179|GO:0042605	chr16	87863731	87863780	AGGCTGGACACCCTCTGCCGAGTAATGACGTGTGTGGCTGGGACCTTCTT
CCNA1	7400279	0.0224601	up	1.90776	2.4463	3.37818	8900	Homo sapiens cyclin A1 (CCNA1), mRNA.	GO:0007049|GO:0007067|GO:0007141|GO:0007283|GO:0051301	GO:0005634|GO:0005829|GO:0015630	GO:0005515|GO:0005515|GO:0005515	chr13	35912278	35913261	CTTGAGGCGACAAGGAGTGTGCGTCAGGACTGAGAACCTGGCTAAGTACG
MYH9	1510458	0.0179086	up	1.91044	-4.11781	-3.1839	4627	Homo sapiens myosin, heavy chain 9, non-muscle (MYH9), mRNA.	GO:0000212|GO:0000904|GO:0001701|GO:0001768|GO:0006928|GO:0007132|GO:0007520|GO:0008360|GO:0016337|GO:0032796|GO:0051295|GO:0000212|GO:0000904|GO:0000910|GO:0001525|GO:0001701|GO:0001768|GO:0006509|GO:0006928|GO:0007132|GO:0007229|GO:0007520|GO:0007605|GO:0008360|GO:0015031|GO:0016337|GO:0030048|GO:0030220|GO:0030224|GO:0031532|GO:0032796|GO:0043534|GO:0050900|GO:0051295	GO:0001725|GO:0001772|GO:0001931|GO:0005737|GO:0005819|GO:0005886|GO:0005913|GO:0005938|GO:0016459|GO:0030863|GO:0031594|GO:0016459|GO:0001725|GO:0001725|GO:0001725|GO:0001725|GO:0001726|GO:0001772|GO:0001931|GO:0005634|GO:0005737|GO:0005819|GO:0005826|GO:0005829|GO:0005886|GO:0005886|GO:0005913|GO:0005938|GO:0008305|GO:0016459|GO:0030863|GO:0031594|GO:0032154|GO:0032154	GO:0003774|GO:0005515|GO:0005524|GO:0051015|GO:0003774|GO:0003779|GO:0005524|GO:0000146|GO:0000166|GO:0005516|GO:0005524|GO:0005524|GO:0016887|GO:0030898|GO:0030898|GO:0042803|GO:0043495|GO:0043531|GO:0051015|GO:0051015|GO:0051015	chr22	35007521	35007570	GTAGCTCGTCCTCACTGGTCTACACTGGTTGCCGAATTTACTTGTATTCC
SGK	4390450	0.0408823	up	1.91693	-3.372	-2.4332	6446	Homo sapiens serum/glucocorticoid regulated kinase (SGK), mRNA.				chr6	134532365	134532414	AGAAAGGGTTTTTATGGACCAATGCCCCAGTTGTCAGTCAGAGCCGTTGG
FOXC1	2760079	0.0148252	up	1.92087	-2.41358	-1.47183	2296	Homo sapiens forkhead box C1 (FOXC1), mRNA.	GO:0001501|GO:0001503|GO:0001541|GO:0001568|GO:0001657|GO:0001701|GO:0001822|GO:0001945|GO:0001974|GO:0003007|GO:0006350|GO:0006916|GO:0007219|GO:0007420|GO:0008354|GO:0014032|GO:0030199|GO:0030203|GO:0032808|GO:0035050|GO:0042475|GO:0043010|GO:0045930|GO:0045944|GO:0046620|GO:0048010|GO:0048341|GO:0048762|GO:0048844|GO:0050880|GO:0055010|GO:0060038	GO:0005634|GO:0005634|GO:0005634|GO:0005720	GO:0003705|GO:0008134|GO:0008301|GO:0016563|GO:0043565|GO:0043565	chr6	1557280	1557329	CTTCCAGCCAGTCTCTGTACCGCACGTCCGGAGCTTTCGTCTACGACTGT
NUAK1	7210497	0.0148252	up	1.92627	-0.280252	0.665561	9891	Homo sapiens NUAK family, SNF1-like kinase, 1 (NUAK1), mRNA.	GO:0006468		GO:0000166|GO:0000287|GO:0004674|GO:0005515|GO:0005515|GO:0005515|GO:0005524|GO:0016740	chr12	106457219	106457268	GGTTTGAGCCCAGAACAGCCTACAGGGGAAAAACAAGCTGGATAACCACC
C20orf46	6110102	0.0236534	up	1.92808	1.85691	2.80407	55321	Homo sapiens chromosome 20 open reading frame 46 (C20orf46), mRNA.		GO:0016020|GO:0016021		chr20	1161274	1161323	GCCCCACACGGGCAAGCAGCCCACTGATCTGTTTTGTAGCTGAGGTTTTG
PVRL3	540156	0.0138558	up	1.93383	0.0338291	0.985287	25945	Homo sapiens poliovirus receptor-related 3 (PVRL3), mRNA.	GO:0007156|GO:0007156	GO:0005886|GO:0005886|GO:0005913|GO:0016021|GO:0043296	GO:0005515|GO:0005515|GO:0042803|GO:0042803	chr3	110852706	110852755	CGGACGTTTCGTGGAGACTACTTTGCCAAGAACTACATTCCACCATCAGA
PRSS23	2190184	0.0250632	up	1.93596	-2.70367	-1.75062	11098	Homo sapiens protease, serine, 23 (PRSS23), mRNA.	GO:0006508	GO:0005576|GO:0005634	GO:0004252|GO:0008233	chr11	86199815	86199864	AGAGGTTCACATGCCTGTCTGCACATTAAAAGCTCTGGGAAGACCTGTTG
GPR177	6940280	0.0435482	up	1.93885	4.46933	5.42454	79971	Homo sapiens G protein-coupled receptor 177 (GPR177), transcript variant 2, mRNA.	GO:0043123	GO:0016020|GO:0016021	GO:0004872|GO:0004872|GO:0004872|GO:0004871	chr1	68611643	68611692	GGCCTTCATCATCGTGGCTGGAATCTGCCTCTGCCTCTACTTCCTGTTTC
CARM1	460382	0.0419254	up	1.93966	-0.437201	0.5186	10498	Homo sapiens coactivator-associated arginine methyltransferase 1 (CARM1), mRNA.	GO:0006350|GO:0006355|GO:0008152|GO:0016568|GO:0016571|GO:0044419|GO:0008152	GO:0005634|GO:0005737	GO:0003713|GO:0005515|GO:0008276|GO:0008469|GO:0016740|GO:0008168|GO:0016740	chr19	10894286	10894335	GGCCTGAGTAGCTCCCCTCCATCCTTGTAGACGCTCCAGTCCCTACTACT
YPEL1	5130288	0.0233424	up	1.94269	2.48873	3.44679	29799	Homo sapiens yippee-like 1 (Drosophila) (YPEL1), mRNA.		GO:0005634		chr22	22052410	22052459	GAGCTGGCTTCAGGGGAAGTGCTATTCACAGGACCATATCCACCACCCTC
LRFN5	520673	0.0369714	up	1.94766	2.58563	3.54737	145581	Homo sapiens leucine rich repeat and fibronectin type III domain containing 5 (LRFN5), mRNA.		GO:0005634|GO:0005737|GO:0016020|GO:0016021|GO:0005634|GO:0005737	GO:0005515|GO:0005515	chr14	41437910	41443156	CACAGAGGCTGGAGTTAATCTGAAGAGCACCACTTCTCCTCTCTCTCCTG
NTM	770202	0.0303607	up	1.95102	1.40944	2.37367	50863	Homo sapiens neurotrimin (NTM), transcript variant 2, mRNA.				chr11	131711174	131711223	GCCCTGTGGCGTTAACAGACAGCAAGCAGCTGAACAAGCAGTACCGTCAG
BIRC5	1230682	0.0258692	up	1.95163	-0.0294526	0.935228	332	Homo sapiens baculoviral IAP repeat-containing 5 (BIRC5), transcript variant 1, mRNA.	GO:0000086|GO:0000086|GO:0000910|GO:0000910|GO:0006915|GO:0006916|GO:0006916|GO:0006916|GO:0006916|GO:0006916|GO:0006916|GO:0007049|GO:0007067|GO:0007067|GO:0031503|GO:0031503|GO:0031536|GO:0031536|GO:0031577|GO:0031577|GO:0043154|GO:0043154|GO:0043154|GO:0045931|GO:0045931|GO:0051303|GO:0051303	GO:0000775|GO:0000775|GO:0000775|GO:0005622|GO:0005634|GO:0005694|GO:0005730|GO:0005737|GO:0005737|GO:0005737|GO:0005814|GO:0005814|GO:0005829|GO:0005829|GO:0005876|GO:0005876|GO:0005876|GO:0005876|GO:0005881|GO:0005881|GO:0030496|GO:0030496|GO:0030496|GO:0030496|GO:0031021|GO:0031021|GO:0043234|GO:0043234|GO:0043234|GO:0043234	GO:0004869|GO:0005515|GO:0005515|GO:0005515|GO:0005515|GO:0005515|GO:0005515|GO:0005515|GO:0005515|GO:0005515|GO:0008017|GO:0008017|GO:0008270|GO:0008270|GO:0008270|GO:0042803|GO:0042803|GO:0042803|GO:0042803|GO:0043027|GO:0043027|GO:0046872|GO:0046982|GO:0046982|GO:0048037|GO:0048037|GO:0050897|GO:0051087	chr17	73732969	73733018	GCACCTGAAAGCTTCCTCGACATCTGTTAATAAAGCCGTAGGCCCTTGTC
RCAN1	620239	0.0170447	up	1.95865	-1.96042	-0.990565	1827	Homo sapiens regulator of calcineurin 1 (RCAN1), transcript variant 3, mRNA.	GO:0007165|GO:0007417|GO:0008015|GO:0019722	GO:0005634	GO:0003700|GO:0005515	chr21	35899067	35899116	CTCTTGGAAAGGAATCTCACTAGGGGCTTGACTGCGTGGGTCTGTAGCGC
ETS2	4220605	0.0114832	up	1.96196	-1.89546	-0.923164	2114	Homo sapiens v-ets erythroblastosis virus E26 oncogene homolog 2 (avian) (ETS2), mRNA.	GO:0001501|GO:0006355	GO:0005634	GO:0003700|GO:0005515|GO:0005515|GO:0043565	chr21	39118265	39118314	GCTTGTCTGTTTACTAGCTGCGTGGCCTTGGACGGGTGGCTGACATCTGT
RYR3	430253	0.0106309	up	1.96955	2.68421	3.66208	6263	Homo sapiens ryanodine receptor 3 (RYR3), mRNA.	GO:0006811|GO:0006816|GO:0006874|GO:0006811|GO:0006816|GO:0006874|GO:0006941	GO:0016020|GO:0016021|GO:0016020|GO:0016021|GO:0030314	GO:0005216|GO:0005219|GO:0005262|GO:0005488|GO:0005509|GO:0004872|GO:0005216|GO:0005219|GO:0005509|GO:0015278	chr15	31945482	31945531	GCCAAAATGGAGTAATGCTTTATGGTCCCTTGTAAGTAGTGGAGCTGCTC
MELK	2340392	0.0131217	up	1.97752	-0.820537	0.163153	9833	Homo sapiens maternal embryonic leucine zipper kinase (MELK), mRNA.	GO:0006468	GO:0005737	GO:0000166|GO:0004674|GO:0005515|GO:0005524|GO:0016740	chr9	36633149	36641743	GTGCCAGCTTCAAAAACCCGATGTGGTGGGTATCAGGAGGCAGCGGCTTA
PAPPA	730754	0.0108479	up	1.97877	-3.73001	-2.7454	5069	Homo sapiens pregnancy-associated plasma protein A, pappalysin 1 (PAPPA), mRNA.	GO:0030154|GO:0006508|GO:0007565|GO:0007565|GO:0030154	GO:0016020|GO:0005576|GO:0005576|GO:0016020	GO:0004175|GO:0004175|GO:0008233|GO:0008237|GO:0008237|GO:0008270|GO:0008270|GO:0046872	chr9	118204015	118204064	CACAATTCCAATCCTTTTTCTGTACCTCACGCGCATAAATTTGCTGCTCC
KHDRBS3	6270273	0.0205212	up	1.98009	-0.515278	0.470289	10656	Homo sapiens KH domain containing, RNA binding, signal transduction associated 3 (KHDRBS3), mRNA.	GO:0006350|GO:0006355|GO:0007283	GO:0005634|GO:0005634|GO:0005730|GO:0005737	GO:0003723|GO:0005515|GO:0017124	chr8	136569717	136569766	AGGCACCTTCAGCGAGGACAGCAAAGGGCGTCTACAGAGACCAGCCATAT
PBK	3420554	0.00768846	up	1.98757	0.56862	1.55963	55872	Homo sapiens PDZ binding kinase (PBK), mRNA.	GO:0006468|GO:0007067	GO:0005575	GO:0000166|GO:0004674|GO:0005515|GO:0005524|GO:0016740	chr8	27723197	27723246	GACTCTGGTTACAGATTGTCTTGATCTCTTGGATCTCCTCAGATCTTTGG
ISLR2	7400184	0.0147912	up	1.98916	2.26276	3.25491	57611	Homo sapiens immunoglobulin superfamily containing leucine-rich repeat 2 (ISLR2), mRNA.		GO:0016020|GO:0016021	GO:0005515|GO:0005515	chr15	72215857	72215906	AATCGTGTTTGCCCGGCGTGTAGTCCCTGACAAGCGTGCCCTGTAGGAGA
C1QL4	4920047	0.00768846	up	1.98992	2.34129	3.33401	338761	Homo sapiens complement component 1, q subcomponent-like 4 (C1QL4), mRNA.		GO:0005576		chr12	49726378	49726427	TAAAACAGGGTAGTGCAGGTTCTCCGTCACAACTTTCTCTCGCCACCCTC
EMID2	5560327	0.0216989	up	2.00554	0.764729	1.76872	136227	Homo sapiens EMI domain containing 2 (EMID2), mRNA.		GO:0005576|GO:0005578|GO:0005783|GO:0005794	GO:0005515	chr7	100988749	100988798	GACCTGGGACACAGCCACGGCAGCAAACTCAGAGAATTGAAGGTGCTGGC
LOC157627	4850546	0.0270745	up	2.00645	2.80598	3.81063	157627	Homo sapiens hypothetical LOC157627 (LOC157627), non-coding RNA.				chr8	9758214	9758263	GATGGGCTCATATGCACCACTGCCATCACAGTCCCCATCGTGATGCAAGC
UHRF1	2940110	0.0267093	up	2.00903	0.467052	1.47355	29128	Homo sapiens ubiquitin-like with PHD and ring finger domains 1 (UHRF1), transcript variant 1, mRNA.	GO:0006281|GO:0006350|GO:0006357|GO:0006464|GO:0006511|GO:0007049|GO:0008283|GO:0006464	GO:0005634	GO:0003700|GO:0003700|GO:0003702|GO:0005515|GO:0008270|GO:0016874|GO:0046872|GO:0005515|GO:0008270|GO:0046872	chr19	4912360	4912409	CCAGTTCTTCCTGACACCGGATGGGTGCTTGGGAACCGTTTGAGCCTTAT
ARG2	5720725	0.0213076	up	2.01116	0.935027	1.94306	384	Homo sapiens arginase, type II (ARG2), nuclear gene encoding mitochondrial protein, mRNA.	GO:0000050|GO:0006525|GO:0006809|GO:0006941	GO:0005739	GO:0004053|GO:0016787|GO:0030145|GO:0046872	chr14	67188009	67188058	CATTTTGGGGTTAGACCTGGGACCACGGCTGGATACTCTGAGGCTGTATG
TPM1	610519	0.0206886	up	2.01435	-3.00055	-1.99024	7168	Homo sapiens tropomyosin 1 (alpha) (TPM1), transcript variant 7, mRNA.	GO:0001701|GO:0006928|GO:0006937|GO:0008016|GO:0009790	GO:0005737|GO:0005856|GO:0005862|GO:0030016|GO:0030017|GO:0031941	GO:0003779|GO:0008307	chr15	61141496	61141843	AGAGATCAAGGTCCTTTCCGACAAGCTGAAGGAGGCTGAGACTCGGGCTG
RELN	4490221	0.0284447	up	2.01506	0.601444	1.61227	5649	Homo sapiens reelin (RELN), transcript variant 2, mRNA.	GO:0000904|GO:0001764|GO:0007411|GO:0007420|GO:0010001|GO:0018108|GO:0021511|GO:0045860|GO:0048265|GO:0051057|GO:0000904|GO:0001764|GO:0007155|GO:0007275|GO:0007411|GO:0007420|GO:0010001|GO:0018108|GO:0021511|GO:0045860|GO:0048265|GO:0051057	GO:0005615|GO:0005737|GO:0005576|GO:0005578|GO:0005615|GO:0005737	GO:0004252|GO:0005509|GO:0005515|GO:0008233|GO:0008270	chr7	102899525	102899574	GGCCCTGTAGCTCTGAATGCTATTTGTGTAACTGAAAGGTTGCACTCTAG
NPTX2	6420050	0.0268776	up	2.0159	3.28591	4.29733	4885	Homo sapiens neuronal pentraxin II (NPTX2), mRNA.	GO:0007268	GO:0005576	GO:0003674|GO:0005509|GO:0005529	chr7	98096728	98096777	GAAGGCTCCCATTTTCTGATGTTCCGCCCCACTGTGAAGAGTGTGCTCGT
PHACTR3	3440341	0.0400813	up	2.0221	-0.324309	0.691544	116154	Homo sapiens phosphatase and actin regulator 3 (PHACTR3), transcript variant 3, mRNA.		GO:0005634|GO:0016363	GO:0003779|GO:0004864	chr20	57855873	57855922	CAGTTCTGCAGTGTAATGGAGGACGGGCAACGTGCATGTGCAGGCTCACC
RCAN1	2850551	0.0127789	up	2.0231	-0.853909	0.162658	1827	Homo sapiens regulator of calcineurin 1 (RCAN1), transcript variant 2, mRNA.	GO:0007165|GO:0007417|GO:0008015|GO:0019722	GO:0005634	GO:0003700|GO:0005515	chr21	35889187	35889236	GTGGCGATATGAGAGGGATGCAGTGCCTTTCCCCATTCATTCCTGATGGA
TPM1	1010482	0.0140281	up	2.02934	-0.788172	0.232838	7168	Homo sapiens tropomyosin 1 (alpha) (TPM1), transcript variant 6, mRNA.	GO:0001701|GO:0006928|GO:0006937|GO:0008016|GO:0009790	GO:0005737|GO:0005856|GO:0005862|GO:0030016|GO:0030017|GO:0031941	GO:0003779|GO:0008307	chr15	61149686	61149735	GGAACTCATGCCAGAAGCCCCTGGTTGTCTGAAAGGTATGCTTTACTCAG
SPP1	3840154	0.0302327	up	2.04358	0.672466	1.70356	6696	Homo sapiens secreted phosphoprotein 1 (SPP1), transcript variant 1, mRNA.	GO:0001503|GO:0007155|GO:0001503|GO:0007155	GO:0005576|GO:0005615|GO:0005737|GO:0045177	GO:0005125|GO:0005515	chr4	88902806	88902855	GGTCACTGATTTTCCCACGGACCTGCCAGCAACCGAAGTTTTCACTCCAG
HKDC1	870301	0.00784036	up	2.04671	0.300435	1.33374	80201	Homo sapiens hexokinase domain containing 1 (HKDC1), mRNA.	GO:0006096		GO:0000166|GO:0004396|GO:0005524|GO:0016301|GO:0016740	chr10	70697054	70697103	TGAAGTATCCAGCCCCAGGGTGCAGAGAGGTTGATTGCCAGGGAGCACTG
TRNP1	7150292	0.0153898	up	2.05427	-4.71122	-3.67259	388610	Homo sapiens TMF1-regulated nuclear protein 1 (TRNP1), mRNA.				chr1	27199449	27199498	CGTGGGAGTGTGCTTGTGGCCCCTCAGAAAGATAGTCTGCTGGCTCCTAG
ANXA2	4780615	0.0096955	up	2.0558	-1.59799	-0.558289	302	Homo sapiens annexin A2 (ANXA2), transcript variant 1, mRNA.	GO:0001501	GO:0005576|GO:0005604|GO:0005625|GO:0005886|GO:0042470	GO:0004859|GO:0005509|GO:0005544|GO:0008092	chr15	58427088	58427137	TGTGGTGGAGATGACTGAAGCCCGACACGGCCTGAGCGTCCAGAAATGGT
ANKRD9	7050370	0.0100785	up	2.06409	-0.368251	0.677255	122416	Homo sapiens ankyrin repeat domain 9 (ANKRD9), mRNA.				chr14	102973237	102973286	ACTGGCAAAGGCTAGGCCCGGAGCACCCTAGGCGCTGGATTTTGGGACAA
PRICKLE1	1770224	0.00794934	up	2.06667	0.0415484	1.08886	144165	Homo sapiens prickle homolog 1 (Drosophila) (PRICKLE1), mRNA.		GO:0005634|GO:0005737|GO:0005829|GO:0016020|GO:0031965	GO:0008270|GO:0046872	chr12	41139375	41139424	CTGTGCATCTTATTGTGAGGCCAGCTTGTCCCCTCGAACCCTCTTTGGCC
B3GALNT1	2970040	0.0302327	up	2.07579	-0.306625	0.747034	8706	Homo sapiens beta-1,3-N-acetylgalactosaminyltransferase 1 (globoside blood group) (B3GALNT1), transcript variant 3, mRNA.	GO:0006486|GO:0009312	GO:0000139|GO:0005794|GO:0016020|GO:0016021	GO:0000287|GO:0008378|GO:0008499|GO:0016757|GO:0047273	chr3	162284475	162284524	GTCATAGCCTAGTGCATTACTCACGTGTCTGTGGAGATGCTGGTGTAAAC
FBN2	3440204	0.022248	up	2.08496	-2.57117	-1.51114	2201	Homo sapiens fibrillin 2 (FBN2), mRNA.	GO:0009653|GO:0030326	GO:0005576|GO:0005578	GO:0005201|GO:0005488|GO:0005509	chr5	127669224	127669459	GGCCAAAGCACATGCAGGCTCCTGGTTGTTCCTCTCAAACCTGTGCTGAC
GRM8	6040431	0.0119357	up	2.09544	1.52946	2.59671	2918	Homo sapiens glutamate receptor, metabotropic 8 (GRM8), mRNA.	GO:0007165|GO:0007186|GO:0007165|GO:0007186|GO:0007194|GO:0007601|GO:0007608|GO:0030818|GO:0050896	GO:0005886|GO:0016021|GO:0005886|GO:0005887	GO:0001642|GO:0004872|GO:0001642|GO:0004872	chr7	125865969	125866018	ATGAGTCTGTTTCTTGTAATGGCTGACCAGATTGAAGCCCTGGGTTGTGC
ANXA2P1	3370202	0.0247826	up	2.09697	-4.39741	-3.3291	303	Homo sapiens annexin A2 pseudogene 1 (ANXA2P1) on chromosome 4.				chr4	154448095	154448144	GAAGTCTATGATGTAAACACTTTGCCTCCTGTGTACTGTGTCATAAACGG
DHCR24	4480341	0.0492723	up	2.10617	-0.45983	0.614789	1718	Homo sapiens 24-dehydrocholesterol reductase (DHCR24), mRNA.	GO:0006695|GO:0006695|GO:0006915|GO:0006916|GO:0006979|GO:0007050|GO:0008104|GO:0009888|GO:0016044|GO:0030539|GO:0031639|GO:0042987|GO:0043154|GO:0043526|GO:0043588|GO:0055114	GO:0000139|GO:0005634|GO:0005783|GO:0005789|GO:0005789|GO:0005794|GO:0016020|GO:0016021	GO:0016491|GO:0019899|GO:0042605|GO:0050614|GO:0050660	chr1	55315467	55315516	CTTGGATATTACTGAAAGGGAGGGGTGGAGATGGGTGTGGCAGTGTATGG
TPM1	2140653	0.0154311	up	2.1063	-0.760779	0.313932	7168	Homo sapiens tropomyosin 1 (alpha) (TPM1), transcript variant 6, mRNA.	GO:0001701|GO:0006928|GO:0006937|GO:0008016|GO:0009790	GO:0005737|GO:0005856|GO:0005862|GO:0030016|GO:0030017|GO:0031941	GO:0003779|GO:0008307	chr15	61149697	61149746	CAGAAGCCCCTGGTTGTCTGAAAGGTATGCTTTACTCAGTCTAATGGTGC
NEFM	1660767	0.0114832	up	2.1085	4.43078	5.507	4741	Homo sapiens neurofilament, medium polypeptide 150kDa (NEFM), mRNA.	GO:0000226|GO:0008088|GO:0031133|GO:0045110|GO:0060052|GO:0000226|GO:0008088|GO:0031133|GO:0045110|GO:0060052	GO:0005882|GO:0005883|GO:0031594|GO:0005883|GO:0030424|GO:0031594	GO:0005198|GO:0005198|GO:0005200	chr8	24832159	24832208	GCATGCAAGCTCAGGGTGCTCCCTCCTCAGTCTTTGGGGGATTCAAATGC
ANXA2	3520328	0.0147912	up	2.11065	-3.21095	-2.13326	302	Homo sapiens annexin A2 (ANXA2), transcript variant 2, mRNA.	GO:0001501	GO:0005576|GO:0005604|GO:0005625|GO:0005886|GO:0042470	GO:0004859|GO:0005509|GO:0005544|GO:0008092	chr15	60639433	60639482	CGTGCTTGGGGTTCAGCTGGTGAGGCTGTCCCTGTAGGAAGAAAGCTCTG
SDC2	2690026	0.0106309	up	2.115	-0.0288782	1.05178	6383	Homo sapiens syndecan 2 (SDC2), mRNA.	GO:0008150	GO:0005887|GO:0016020	GO:0003674|GO:0008092	chr8	97623107	97623156	AGCTTTCTAAAGCCACGCTGTGTCCCTCAATTACAGAGGGTAGGAATGGG
VGF	2850619	0.00949059	up	2.11884	4.00866	5.09194	7425	Homo sapiens VGF nerve growth factor inducible (VGF), mRNA.	GO:0001541|GO:0006091|GO:0019953|GO:0051591	GO:0005576|GO:0005615|GO:0031410	GO:0003674|GO:0005184|GO:0008083	chr7	100592625	100592674	TAATTGTGTGAAGTGTGTCTGTCTCCAGCCCTTCGGGCCTCCCACGAGCC
ISG20L1	4480288	0.0162215	up	2.12134	-0.316854	0.768126	64782	Homo sapiens interferon stimulated exonuclease gene 20kDa-like 1 (ISG20L1), mRNA.	GO:0006915|GO:0006974	GO:0005622|GO:0005634	GO:0003676|GO:0004527|GO:0016787	chr15	86976380	86976429	TCAATTGAGCAGTAGCTTTGATCCCTTGGTCTGGGGGTCGAAGGAAGATG
RARB	5720441	0.0164316	up	2.13048	0.342145	1.43333	5915	Homo sapiens retinoic acid receptor, beta (RARB), transcript variant 1, mRNA.	GO:0006355|GO:0006350|GO:0006355|GO:0007165	GO:0005634|GO:0005575|GO:0005634|GO:0005737	GO:0003708|GO:0003700|GO:0003707|GO:0003708|GO:0008270|GO:0043565|GO:0046872	chr3	25614019	25614068	GCAGGCTGGTCTACCACTGGACCATGTAACTCTAGTGTCCTTCCTGATTC
KATNAL1	2470600	0.0300071	up	2.13132	0.0937913	1.18554	84056	Homo sapiens katanin p60 subunit A-like 1 (KATNAL1), transcript variant 2, mRNA.		GO:0005874	GO:0000166|GO:0005524|GO:0008568|GO:0016787|GO:0017111	chr13	30777013	30777062	TCATATGATGGTACGGCAGCAGGGAGTGGCCCCCAGTTAACATGGCTGTG
PVRL3	4850500	0.0116563	up	2.13927	-0.0427901	1.05433	25945	Homo sapiens poliovirus receptor-related 3 (PVRL3), mRNA.	GO:0007156|GO:0007156	GO:0005886|GO:0005886|GO:0005913|GO:0016021|GO:0043296	GO:0005515|GO:0005515|GO:0042803|GO:0042803	chr3	110852498	110852547	CACCCTTCAGCCTACAATTCAGTGGCATCCCTCAACTGCTGACATCGAGG
PMP22	7560138	0.00764478	up	2.14211	0.122509	1.22154	5376	Homo sapiens peripheral myelin protein 22 (PMP22), transcript variant 2, mRNA.	GO:0007268|GO:0007422|GO:0007605|GO:0007638|GO:0032288	GO:0016020|GO:0016021|GO:0016020|GO:0016021		chr17	15133244	15133293	TAGAGCTTGGCTGGGTCTAGGCTGTTCTGTGCCTCCAAGGACTGTCTGGC
SNAI2	6330730	0.0090274	up	2.15493	-6.04368	-4.93605	6591	Homo sapiens snail homolog 2 (Drosophila) (SNAI2), mRNA.	GO:0000122|GO:0006350|GO:0006355|GO:0007275|GO:0007499|GO:0007605|GO:0009314	GO:0005622|GO:0005634	GO:0003677|GO:0008270|GO:0046872	chr8	49993471	49993520	AGGATTTCCCATAGGAAGAGATCTGCCAGACGCGAACTCAGGTGCCTTAA
SHROOM3	6280400	0.00874808	up	2.16284	-0.417029	0.695896	57619	Homo sapiens shroom family member 3 (SHROOM3), mRNA.	GO:0000902|GO:0007389|GO:0008360|GO:0043482|GO:0045176	GO:0005737|GO:0005856|GO:0005874|GO:0005912|GO:0016324|GO:0043296	GO:0003779|GO:0005515	chr4	77704118	77704167	CTCAAAGTGTGGTCAGGATACGATCTGCATCAGAATCCTTGGAATGCTTG
SEZ6	6940553	0.0357095	up	2.17324	2.24712	3.36696	124925	Homo sapiens seizure related 6 homolog (mouse) (SEZ6), transcript variant 2, mRNA.		GO:0005886|GO:0016021		chr17	27282069	27282118	TCCAAGGACCCAGGAATTTGGCATGGAACAGGTGGTAGGAGAGCCCCAGG
MYC	6550600	0.0108479	up	2.1742	-2.53493	-1.41444	4609	Homo sapiens v-myc myelocytomatosis viral oncogene homolog (avian) (MYC), mRNA.	GO:0006355|GO:0006355|GO:0006355|GO:0006355|GO:0006355|GO:0001783|GO:0001836|GO:0006309|GO:0006357|GO:0006879|GO:0006919|GO:0007050|GO:0008284|GO:0008629|GO:0008633|GO:0008634|GO:0009314|GO:0016485|GO:0042474|GO:0042981|GO:0043279|GO:0043473|GO:0048705|GO:0050910	GO:0005634|GO:0005634|GO:0005634|GO:0005634|GO:0005634|GO:0005634|GO:0005819|GO:0016604	GO:0003700|GO:0003700|GO:0003700|GO:0003700|GO:0003677|GO:0003700|GO:0005515|GO:0005515|GO:0005515|GO:0005515	chr8	128822444	128822493	ACTTGTTTCAAATGCATGATCAAATGCAACCTCACAACCTTGGCTGAGTC
SPRY4	730576	0.0153913	up	2.19125	-0.315202	0.816551	81848	Homo sapiens sprouty homolog 4 (Drosophila) (SPRY4), mRNA.	GO:0007275|GO:0009966|GO:0043407|GO:0007275|GO:0009966|GO:0043407	GO:0005737|GO:0005886|GO:0042995|GO:0016020	GO:0005515|GO:0005515	chr5	141670570	141670619	GGGCATCCTGCGAGCCTCACTAGCCTTCTGGTTCATGCCTTTGACAAGCA
DNAJC22	7510544	0.0148296	up	2.20093	0.688328	1.82644	79962	Homo sapiens DnaJ (Hsp40) homolog, subfamily C, member 22 (DNAJC22), mRNA.		GO:0016020|GO:0016021	GO:0031072	chr12	48031542	48031591	CCCGGAGGTGAAAAGAAACTTCCCCCTGAGGACTGACTCTTCCTAGCAGA
THY1	6480204	0.0124379	up	2.21305	-4.93144	-3.7854	7070	Homo sapiens Thy-1 cell surface antigen (THY1), mRNA.	GO:0001525|GO:0006469|GO:0007010|GO:0016337|GO:0030336|GO:0043547|GO:0046549|GO:0048041|GO:0050771|GO:0050860|GO:0050870|GO:0051281|GO:0008150	GO:0005783|GO:0005886|GO:0005887|GO:0009897|GO:0030426|GO:0031225|GO:0031362|GO:0045121|GO:0005575	GO:0005100|GO:0005178|GO:0005515|GO:0034235|GO:0003674	chr11	118794230	118794279	CTGAGGCAAGCCATGGAGTGAGACCCAGGAGCCGGACACTTCTCAGGAAA
PCLO	5490280	0.0388331	up	2.21623	1.55265	2.70076	27445	Homo sapiens piccolo (presynaptic cytomatrix protein) (PCLO), transcript variant 1, mRNA.	GO:0006810|GO:0007010|GO:0016079	GO:0005856|GO:0008021|GO:0016020|GO:0030054|GO:0045202	GO:0005215|GO:0005509|GO:0005522|GO:0005544|GO:0008270	chr7	82383748	82383797	GTGACGTGCTCAGGTGCTCCCACTACTGATTAATGTGTGTGCTAATATCC
GUCY1A3	4860681	0.0216265	up	2.21994	0.518822	1.66934	2982	Homo sapiens guanylate cyclase 1, soluble, alpha 3 (GUCY1A3), mRNA.	GO:0007263|GO:0008217|GO:0030828|GO:0052565|GO:0060087	GO:0005737|GO:0008074	GO:0004383|GO:0004872	chr4	156862652	156862701	CTGCACTCTGGATCAGTTTTTGCTGGCGTCGTTGGAGTTAAAATGCCCCG
PGM2L1	7210093	0.0440513	up	2.22228	2.53741	3.68946	283209	Homo sapiens phosphoglucomutase 2-like 1 (PGM2L1), mRNA.	GO:0005975|GO:0006006		GO:0016740|GO:0016853|GO:0016868|GO:0047933	chr11	74041643	74041692	GAGCCACTCAAGCAAGACTCTGCTTCTATGTATGGTGAGGCCTTGTTGTT
SLC12A5	2070372	0.041565	up	2.24298	3.45156	4.61698	57468	Homo sapiens solute carrier family 12, (potassium-chloride transporter) member 5 (SLC12A5), mRNA.	GO:0006811|GO:0006813|GO:0006814|GO:0006821|GO:0006873	GO:0016020|GO:0016021	GO:0005215|GO:0015293|GO:0015379|GO:0030955	chr20	44121984	44122033	AGGCCTGCCTTTAATTTTCAGTGTAAGTGTTCAGTATGCCGCATCCTGCC
SHRM	6520561	0.00768846	up	2.24302	-0.0277395	1.1377	57619	Homo sapiens shroom (SHRM), mRNA.				chr4	77919520	77919569	CCTTCCTGATTGATCTTCTGAGAGCTCGAATGCTGCTGGACACGTACCCC
ACBD7	630678	0.0220587	up	2.24802	4.18616	5.35481	414149	PREDICTED: Homo sapiens acyl-Coenzyme A binding domain containing 7 (ACBD7), mRNA.			GO:0000062|GO:0005488|GO:0000062	chr10	15157561	15157610	GGCAGCAGGAGGGATGATCCTGCAGTGATGGAATGTTCTGTCTTGATTGT
NEFL	3140139	0.0342556	up	2.24881	3.31513	4.48429	4747	Homo sapiens neurofilament, light polypeptide 68kDa (NEFL), mRNA.	GO:0008089|GO:0008090|GO:0019896|GO:0033693|GO:0033693|GO:0045109|GO:0045109	GO:0005882|GO:0005883|GO:0030424|GO:0033596	GO:0005198|GO:0005200|GO:0008022|GO:0042802	chr8	24867064	24867113	CAGACCAGCTCCTATCTGATGTCCACCCGCTCCTTCCCGTCCTACTACAC
FAM46B	4180324	0.0174535	up	2.25321	-0.575081	0.596901	115572	Homo sapiens family with sequence similarity 46, member B (FAM46B), mRNA.				chr1	27204252	27204301	GAGCCCTCCTGCCTGGGAGCTTGTTCTTTGGAAGGTGCTGAGCCTGAATT
ANXA2	770730	0.0204981	up	2.26131	-3.81596	-2.6388	302	Homo sapiens annexin A2 (ANXA2), transcript variant 2, mRNA.	GO:0001501	GO:0005576|GO:0005604|GO:0005625|GO:0005886|GO:0042470	GO:0004859|GO:0005509|GO:0005544|GO:0008092	chr15	60689458	60689507	TCACTCTACCCGGAGAGTTTCCCGCTTGGTTGAACACATTGGCCTCAGGA
VASN	2900274	0.0121768	up	2.26328	-4.81339	-3.63498	114990	Homo sapiens vasorin (VASN), mRNA.		GO:0005576|GO:0016020|GO:0016021	GO:0005515	chr16	4373289	4373338	GGTAGGCGGCTGTGTGACTCTAGTCTTGGCCCCAGGAAGCGAAGGAACAA
HK1	1660196	0.041551	up	2.27222	-0.268879	0.915223	3098	Homo sapiens hexokinase 1 (HK1), nuclear gene encoding mitochondrial protein, transcript variant 5, mRNA.	GO:0006096	GO:0005739|GO:0005741|GO:0005829|GO:0005829|GO:0016020	GO:0000166|GO:0004396|GO:0004396|GO:0004396|GO:0005524|GO:0016301|GO:0016740	chr10	70831441	70831490	CGTGTGTCCGTGGAACCAGTCCTAGCCGCGTGTGACAGTCTTGCATTCTG
GLS	5570427	0.0484808	up	2.27824	-3.1568	-1.96888	2744	Homo sapiens glutaminase (GLS), mRNA.	GO:0002087|GO:0006543|GO:0006543|GO:0007268|GO:0007610	GO:0005739|GO:0005759	GO:0004359|GO:0004359|GO:0004359|GO:0004359|GO:0004359|GO:0016787	chr2	191538326	191538375	GTCTGGCAGGGACTGAATGACCTGATGTCAGATTTAGATTCTTCCTGGGG
MKX	6620017	0.0377133	up	2.28483	-2.65415	-1.46206	283078	Homo sapiens mohawk homeobox (MKX), mRNA.	GO:0006355|GO:0007275|GO:0007517	GO:0005634|GO:0005730	GO:0003700|GO:0043565	chr10	28001951	28002000	ATCCCCCCAGTCCTTTAAAAGAATCTTGAACAATGCTGAGCCGGCAGCTG
SHISA2	7650523	0.0265439	up	2.29729	1.43933	2.63926	387914	Homo sapiens shisa homolog 2 (Xenopus laevis) (SHISA2), mRNA.	GO:0007275	GO:0005783|GO:0005789|GO:0016020|GO:0016021		chr13	26619063	26619112	CCCACACTGTTCTTGATTTCCTCTCTCTTTCAGGCCTCAACAGGCACTGT
GPR177	6220075	0.0109402	up	2.3115	5.19347	6.4023	79971	Homo sapiens G protein-coupled receptor 177 (GPR177), transcript variant 1, mRNA.	GO:0043123	GO:0016020|GO:0016021	GO:0004872|GO:0004872|GO:0004872|GO:0004871	chr1	68591898	68591947	TGAGATCTACAAGTTGACCCGCAAGGAGGCCCAGGAGTAGGAGGCTGCAG
TPM1	5560246	0.0179086	up	2.31212	-3.09284	-1.88363	7168	Homo sapiens tropomyosin 1 (alpha) (TPM1), transcript variant 3, mRNA.	GO:0001701|GO:0006928|GO:0006937|GO:0008016|GO:0009790	GO:0005737|GO:0005856|GO:0005862|GO:0030016|GO:0030017|GO:0031941	GO:0003779|GO:0008307	chr15	61141526	61141873	GGAGGCTGAGACTCGGGCTGAGTTTGCGGAGAGGTCAGTAACTAAATTGG
LDLR	1440736	0.0266481	up	2.32806	-0.366915	0.852212	3949	Homo sapiens low density lipoprotein receptor (familial hypercholesterolemia) (LDLR), mRNA.	GO:0006493|GO:0006629|GO:0006629|GO:0006869|GO:0006897|GO:0008202|GO:0008203|GO:0030299|GO:0030301|GO:0034383|GO:0042632|GO:0044419	GO:0005768|GO:0005886|GO:0005886|GO:0005886|GO:0005887|GO:0005905|GO:0010008|GO:0030669	GO:0004888|GO:0005041|GO:0005319|GO:0005509|GO:0008034|GO:0030229	chr19	11105336	11105385	GCACGAACTGGACTGTGTGCAACGCTTTTTGGGAGAATGATGTCCCCGTT
SERPINE2	5080192	0.0179086	up	2.33892	-2.7188	-1.49296	5270	Homo sapiens serpin peptidase inhibitor, clade E (nexin, plasminogen activator inhibitor type 1), member 2 (SERPINE2), mRNA.	GO:0007275|GO:0007399|GO:0030154|GO:0030162|GO:0030162|GO:0030334	GO:0005576|GO:0005576	GO:0004867|GO:0004867|GO:0008201	chr2	224548185	224548234	GTCTTGCTAGACAAGGTTGCTGTTGTGCAGTGTGCCTGTCACTACTGGTC
SPP1	3460070	0.0162414	up	2.34691	0.816455	2.04722	6696	Homo sapiens secreted phosphoprotein 1 (SPP1), transcript variant 2, mRNA.	GO:0001503|GO:0007155|GO:0001503|GO:0007155	GO:0005576|GO:0005615|GO:0005737|GO:0045177	GO:0005125|GO:0005515	chr4	88903786	88903835	GTCAGCTGGATGACCAGAGTGCTGAAACCCACAGCCACAAGCAGTCCAGA
PLEKHG3	4010397	0.0267093	up	2.36427	-0.961105	0.280291	26030	Homo sapiens pleckstrin homology domain containing, family G (with RhoGef domain) member 3 (PLEKHG3), mRNA.	GO:0035023	GO:0005622	GO:0005089	chr14	64280548	64280597	AGGCAGTGGCCTGGAGAGGCTTTGTTCTGTAACGGTGCCTTTTCTTAGGG
FAM19A2	7400379	0.039629	up	2.37271	2.03333	3.27986	338811	Homo sapiens family with sequence similarity 19 (chemokine (C-C motif)-like), member A2 (FAM19A2), mRNA.		GO:0005737		chr12	62102638	62102687	CACTGACGTGGTCAGTTAGACATACGTTGGTTTCCAGGATAGAGGCCCAT
DUSP6	5260288	0.0167887	up	2.39217	-1.15327	0.105048	1848	Homo sapiens dual specificity phosphatase 6 (DUSP6), transcript variant 2, mRNA.	GO:0000188|GO:0006470	GO:0005625|GO:0005654|GO:0005737	GO:0004722|GO:0004725|GO:0004725|GO:0005515|GO:0016787|GO:0017017	chr12	89742147	89742196	GTTGTCGCAAAGGGGATAATCTGGGAAAGACACCAAATCATGGGCTCACT
FGF12	4070184	0.0207603	up	2.39883	2.13985	3.40218	2257	Homo sapiens fibroblast growth factor 12 (FGF12), transcript variant 1, mRNA.	GO:0007165|GO:0007165|GO:0007267|GO:0007267|GO:0007399|GO:0007507	GO:0005615|GO:0005634	GO:0008083|GO:0008083|GO:0008083	chr3	193343146	193343195	GCAGCTATGACTCCAACAGACAGGATTGTGTGAGCAGCTGAAAGGAGCAA
STXBP6	2370092	0.0153898	up	2.40049	-1.94375	-0.680418	29091	Homo sapiens syntaxin binding protein 6 (amisyn) (STXBP6), mRNA.	GO:0016192	GO:0005737|GO:0016020|GO:0016021		chr14	25325210	25325259	GGTAGCCAGCACAGCGTCAGAAAAATGCACCTTCTTCCAGATCCTCCACC
MBP	3780681	0.0140352	up	2.40392	-1.81461	-0.549225	4155	Homo sapiens myelin basic protein (MBP), transcript variant 8, mRNA.	GO:0006955|GO:0007268|GO:0007417|GO:0008366	GO:0005886|GO:0043209	GO:0019911|GO:0019911|GO:0019911|GO:0019911|GO:0019911|GO:0019911	chr18	74724962	74725011	CTGCTCACTGTGTCCTTCTGTGGTCTCAGGAGCTGCAGTTGTTGCTGTTG
GJA1	6940017	0.0283668	up	2.41975	-1.14279	0.132073	2697	Homo sapiens gap junction protein, alpha 1, 43kDa (GJA1), mRNA.	GO:0006810|GO:0006936|GO:0007267|GO:0007507|GO:0007605|GO:0016264|GO:0043123	GO:0005886|GO:0005886|GO:0005886|GO:0005886|GO:0005887|GO:0005922|GO:0030054|GO:0030660	GO:0004871|GO:0005515|GO:0015075	chr6	121770480	121770529	GAGTTTAGCAGTCTTTTGGAGTGACCAGCAACTTTGATGTTTGCACTAAG
NUAK1	1690156	0.00794934	up	2.42152	-0.166259	1.10966	9891	Homo sapiens NUAK family, SNF1-like kinase, 1 (NUAK1), mRNA.	GO:0006468		GO:0000166|GO:0000287|GO:0004674|GO:0005515|GO:0005515|GO:0005515|GO:0005524|GO:0016740	chr12	106457601	106457650	GATGGGGAGCACTTTTCAGGGTGAAATTCAGGCGAGTTTTGCCCAGGCCT
SYT13	4810730	0.0195739	up	2.44482	3.37081	4.66054	57586	Homo sapiens synaptotagmin XIII (SYT13), mRNA.	GO:0016192	GO:0005887|GO:0016020|GO:0030133		chr11	45218650	45218699	CTGGGCACAGAGAATCAGCTAGGAGACCAGTTATTCAGGGTCCATTTCTC
HSPA12A	1400044	0.0106309	up	2.44928	-0.10035	1.19201	259217	Homo sapiens heat shock 70kDa protein 12A (HSPA12A), mRNA.			GO:0000166|GO:0005524	chr10	118431754	118431803	CACCACCAGACGGGACTGTGTCTGCAAACTCTCTTGTCTTCACAGACGCC
PITX2	3990440	0.0207603	up	2.45263	-1.37398	-0.0796514	5308	Homo sapiens paired-like homeodomain 2 (PITX2), transcript variant 1, mRNA.	GO:0006355|GO:0007275|GO:0007368|GO:0009887	GO:0005634|GO:0005667	GO:0003700|GO:0008134|GO:0008134|GO:0043565	chr4	111758638	111758687	GGGCAACTCCGCCCTTGAAAGACTGGGAATTATGCTAGAAGGTCGTGGGC
BAMBI	430050	0.0138558	up	2.45473	-1.53899	-0.243423	25805	Homo sapiens BMP and activin membrane-bound inhibitor homolog (Xenopus laevis) (BAMBI), mRNA.		GO:0005737|GO:0016020|GO:0016021		chr10	28971562	28971611	CACACTGTCACCAGGGTTATTTGCATCCAAGGGAGCTGGAATTGAGTACC
CX3CL1	630521	0.0236805	up	2.48252	2.58698	3.89879	6376	Homo sapiens chemokine (C-X3-C motif) ligand 1 (CX3CL1), mRNA.	GO:0006952|GO:0006955|GO:0007155|GO:0019221|GO:0030595|GO:0050729|GO:0050902|GO:0051041	GO:0005576|GO:0005615|GO:0005886|GO:0009986|GO:0016021	GO:0008009	chr16	55976263	55976312	TTTGTGAGGAAGCCGCTGGGGCCAGTTGGTCCCCCTTCCATGGACTTTGT
SRRM4	4220253	0.0254682	up	2.49016	1.88454	3.20078	84530	Homo sapiens serine/arginine repetitive matrix 4 (SRRM4), mRNA.				chr12	118084925	118084974	GTGCACCCCAAGGCCATTTCTCTGCATTGGAGGCTGCGAATCTCCTCTGG
COL11A1	3460743	0.0247826	up	2.53386	2.58235	3.92369	1301	Homo sapiens collagen, type XI, alpha 1 (COL11A1), transcript variant A, mRNA.	GO:0001502|GO:0007601|GO:0007605|GO:0030198	GO:0005576|GO:0005581|GO:0005592	GO:0005201|GO:0030674	chr1	103345422	103345471	GGTGCCACCAACCCATTTTGTGCCACATGCAAGTTTTGAATAAGGATGGT
COL11A1	5560739	0.0153898	up	2.55258	2.76544	4.1174	1301	Homo sapiens collagen, type XI, alpha 1 (COL11A1), transcript variant B, mRNA.	GO:0001502|GO:0007601|GO:0007605|GO:0030198	GO:0005576|GO:0005581|GO:0005592	GO:0005201|GO:0030674	chr1	103343309	103343358	TCTGGAAGACTTTTGGAAGCACACTCTGATCAACTCTTCTCTGCCGACAG
NTM	1440376	0.0447799	up	2.56098	0.266802	1.6235	50863	Homo sapiens neurotrimin (NTM), transcript variant 2, mRNA.				chr11	131710915	131710964	CGCAGGGTCCTTTCTCAGACATTACTGCATGCTGTATATGGCGTTAGCTG
LPPR1	10438	0.0287179	up	2.56753	3.71148	5.07187	54886	Homo sapiens lipid phosphate phosphatase-related protein type 1 (LPPR1), transcript variant 2, mRNA.		GO:0016020|GO:0016021	GO:0003824	chr9	103126851	103126900	GCCACTGTCAGCTTTTCTCCAAAAAGCAGCCAACATCAGCCTCCCCTGTC
SYT4	3180639	0.0458318	up	2.58359	6.65316	8.02253	6860	Homo sapiens synaptotagmin IV (SYT4), mRNA.	GO:0006810|GO:0007269	GO:0008021|GO:0016020|GO:0016021|GO:0030054|GO:0031410|GO:0043005|GO:0045202|GO:0048471	GO:0005215|GO:0005509	chr18	39101915	39101964	TGGAAGGAAGCATGGTGTGTGAGACAGTGTCTGTTCTTTTGTGCCAGCTC
SCTR	7000433	0.00238896	up	2.58867	0.60558	1.97779	6344	Homo sapiens secretin receptor (SCTR), mRNA.	GO:0007165|GO:0007186|GO:0007586|GO:0007588	GO:0005886|GO:0005887	GO:0004872|GO:0004930|GO:0004999|GO:0015055	chr2	120197484	120197533	GGCACTGTGGGGCAGGACAAGGGCCTGGGATTTGGTTCGTTTGCTCTTCT
EBF1	1110592	0.0492723	up	2.63342	-0.103916	1.29302	1879	Homo sapiens early B-cell factor 1 (EBF1), mRNA.	GO:0006355|GO:0007275|GO:0045941	GO:0005634	GO:0003700|GO:0005515|GO:0008270|GO:0046872	chr5	158058476	158058525	GAAGAGGGATCTGCAAGTGCAGGGTGTTGGTTAAAGTTGTACCTCCCAAG
SH3GL3	1300603	0.0150841	up	2.64024	1.90998	3.31065	6457	Homo sapiens SH3-domain GRB2-like 3 (SH3GL3), mRNA.	GO:0006897|GO:0007165|GO:0007417	GO:0005737|GO:0005768|GO:0016020|GO:0031901|GO:0005737	GO:0005515|GO:0008289|GO:0042802|GO:0005515	chr15	82078094	82078143	CCAGTGTGCTCTCAGTGCGGTGTTCTGTGACATCCTTTGCTCTCTGACCA
MARCH4	3940044	0.0347115	up	2.66479	-3.60406	-2.19004	57574	Homo sapiens membrane-associated ring finger (C3HC4) 4 (MARCH4), mRNA.	GO:0006511	GO:0000139|GO:0005794|GO:0016020|GO:0016021	GO:0008270|GO:0016874|GO:0046872	chr2	216830970	216831019	CCTGCCAGGGAAGGCCACTGGGTGTTCACCTGCAAAGTTTCTGGTTGTCA
ADM	5670465	0.0383012	up	2.68532	-6.75939	-5.3343	133	Homo sapiens adrenomedullin (ADM), mRNA.	GO:0006171|GO:0006701|GO:0007165|GO:0007267|GO:0007507|GO:0007565|GO:0008015|GO:0008284|GO:0009611|GO:0045906	GO:0005576|GO:0005615|GO:0005625|GO:0005737	GO:0005179	chr11	10285345	10285394	GTCTCAGCGAGGTGTAAAGTTGTTCGCCGCGTGGAATGTGAGTGTGTTTG
MYC	6270646	0.00783209	up	2.76278	-2.54871	-1.08259	4609	Homo sapiens v-myc myelocytomatosis viral oncogene homolog (avian) (MYC), mRNA.	GO:0006355|GO:0006355|GO:0006355|GO:0006355|GO:0006355|GO:0001783|GO:0001836|GO:0006309|GO:0006357|GO:0006879|GO:0006919|GO:0007050|GO:0008284|GO:0008629|GO:0008633|GO:0008634|GO:0009314|GO:0016485|GO:0042474|GO:0042981|GO:0043279|GO:0043473|GO:0048705|GO:0050910	GO:0005634|GO:0005634|GO:0005634|GO:0005634|GO:0005634|GO:0005634|GO:0005819|GO:0016604	GO:0003700|GO:0003700|GO:0003700|GO:0003700|GO:0003677|GO:0003700|GO:0005515|GO:0005515|GO:0005515|GO:0005515	chr8	128822194	128822243	CCTGCGTGACCAGATCCCGGAGTTGGAAAACAATGAAAAGGCCCCCAAGG
PMP22	270538	0.00768846	up	2.81095	-0.685656	0.805404	5376	Homo sapiens peripheral myelin protein 22 (PMP22), transcript variant 2, mRNA.	GO:0007268|GO:0007422|GO:0007605|GO:0007638|GO:0032288	GO:0016020|GO:0016021|GO:0016020|GO:0016021		chr17	15165758	15165807	CCAACGCACCCGAGTTTGTGTTTGAGGCCACCCTGAGGATCGGGACAGCT
GRIA2	6220750	0.0302327	up	2.84312	3.7565	5.26398	2891	Homo sapiens glutamate receptor, ionotropic, AMPA 2 (GRIA2), mRNA.	GO:0006811|GO:0007268|GO:0006811|GO:0007165|GO:0007268|GO:0007268	GO:0005624|GO:0016021|GO:0030054|GO:0045202|GO:0045211|GO:0005624|GO:0005886|GO:0016021|GO:0030054|GO:0045202|GO:0045211	GO:0004872|GO:0004970|GO:0005216|GO:0005234|GO:0005515|GO:0004872|GO:0004970|GO:0004971|GO:0005216|GO:0005234|GO:0005515|GO:0015277	chr4	158504133	158504182	GCAGTGCATGCTGTCCCTTACGTGAGTCCTGGCATGGGAATGAATGTCAG
ONECUT2	110189	0.0257309	up	2.87841	1.8367	3.36197	9480	Homo sapiens one cut homeobox 2 (ONECUT2), mRNA.	GO:0006355|GO:0009887	GO:0005634	GO:0003700|GO:0003702|GO:0043565	chr18	53301124	53301173	ACCACAGTGCAGGGAAAACAAAAGTATCCCAGCATCTTCATCCTGTACAC
PRSS35	5090307	0.00768846	up	2.91078	1.54493	3.08634	167681	Homo sapiens protease, serine, 35 (PRSS35), mRNA.	GO:0006508	GO:0005576	GO:0003824|GO:0004252	chr6	84234889	84234938	CAGCTCATGCCCTCAATGTTTATATTGTGTTATCTGTTGGGTCTGGGACA
MPPED2	430743	0.020746	up	2.91853	0.689046	2.23429	744	Homo sapiens metallophosphoesterase domain containing 2 (MPPED2), mRNA.	GO:0007399		GO:0016787	chr11	30388701	30388750	CACATCAGAAGTCGGAAGGAACTGACACATTCTCTCAGAGCTCAAGGTCT
GALNT9	5340136	0.00764478	up	2.94538	0.301337	1.85979	50614	Homo sapiens UDP-N-acetyl-alpha-D-galactosamine:polypeptide N-acetylgalactosaminyltransferase 9 (GalNAc-T9) (GALNT9), mRNA.	GO:0006493	GO:0000139|GO:0005794|GO:0016020|GO:0016021	GO:0004653|GO:0005509|GO:0005515|GO:0005529|GO:0016757|GO:0030145|GO:0005515	chr12	131247063	131247112	AAGAGGGGTGCTGGAGGACATGGACAGCGACAAACCTGAGGCCGTGTCTA
SLC15A3	4220044	0.00238896	up	2.99172	-0.104853	1.47612	51296	Homo sapiens solute carrier family 15, member 3 (SLC15A3), mRNA.	GO:0006857|GO:0015031|GO:0006857	GO:0005765|GO:0016020|GO:0016021|GO:0016020	GO:0005215|GO:0015198|GO:0015293|GO:0005215	chr11	60461216	60461265	ACAGGCCCTATTCCAGCCCCCTTGCTTCACTCTACCGGACAGACGGCAGC
SPOCK1	6380669	0.00794934	up	2.99853	-0.439488	1.14477	6695	Homo sapiens sparc/osteonectin, cwcv and kazal-like domains proteoglycan (testican) 1 (SPOCK1), mRNA.	GO:0006928|GO:0007155|GO:0007275|GO:0007399|GO:0008283	GO:0005576|GO:0005578	GO:0005509	chr5	136339966	136340015	GTCTGTCCAGGTCTGTCCCCCTGCTCATCCCAGGATGCCACTCACATTTT
GAD1	3840192	0.0271931	up	3.02074	1.93141	3.52631	2571	Homo sapiens glutamate decarboxylase 1 (brain, 67kDa) (GAD1), transcript variant GAD67, mRNA.	GO:0006540|GO:0007268|GO:0018352|GO:0019752|GO:0042136|GO:0019752	GO:0005622|GO:0005737|GO:0005739|GO:0012506|GO:0030424|GO:0045202	GO:0004351|GO:0005515|GO:0016829|GO:0030170|GO:0016829|GO:0016831|GO:0030170	chr2	171425627	171425676	CGCTCTCTGTCTGGCTGTACGTCTGGTGTTCTCAATGCTTTTCTAGCAAC
CHST7	5900452	0.00768846	up	3.12678	0.838508	2.48319	56548	Homo sapiens carbohydrate (N-acetylglucosamine 6-O) sulfotransferase 7 (CHST7), mRNA.	GO:0005976|GO:0006044|GO:0006790|GO:0030206	GO:0000139|GO:0005794|GO:0016020|GO:0016021|GO:0016021	GO:0001517|GO:0008459|GO:0016740|GO:0034482	chrX	46342593	46342642	ACCTGACTCATCCAGCTGTCCTTCAAATAGCTCCGTCTCCCTCTACCCAG
LPL	5560674	0.0031005	up	3.13892	1.60472	3.25499	4023	Homo sapiens lipoprotein lipase (LPL), mRNA.	GO:0006641|GO:0006644|GO:0008015|GO:0016042	GO:0005576|GO:0005886|GO:0031225|GO:0042627	GO:0004465|GO:0004620|GO:0004806|GO:0005102|GO:0005319|GO:0008201|GO:0016787	chr8	19824432	19824481	ACTTAAAAGATTCACTAAAGCAGCACATAGCACTGGGAACTCTGGCTCCG
CTGF	5690687	0.00768846	up	3.14355	-1.64474	0.00765737	1490	Homo sapiens connective tissue growth factor (CTGF), mRNA.	GO:0001502|GO:0001503|GO:0001525|GO:0001558|GO:0006260|GO:0007155|GO:0007160|GO:0007229|GO:0008543|GO:0008544|GO:0009611|GO:0016477|GO:0030154	GO:0005576|GO:0005578|GO:0005886	GO:0005178|GO:0005515|GO:0005520|GO:0008201	chr6	132311203	132311252	CAGTGTCCTTGGCAGGCTGATTTCTAGGTAGGAAATGTGGTAGCTCACGC
ONECUT2	2480431	0.0134758	up	3.16619	2.02472	3.68747	9480	Homo sapiens one cut homeobox 2 (ONECUT2), mRNA.	GO:0006355|GO:0009887	GO:0005634	GO:0003700|GO:0003702|GO:0043565	chr18	53309270	53309319	CAGTGGCTGCCCTGAAATCCTGGTGGGGATGAGGATCACGCTTCATCATC
PROM1	7400452	0.00768846	up	3.20151	4.27606	5.95481	8842	Homo sapiens prominin 1 (PROM1), mRNA.	GO:0007601|GO:0050896	GO:0005615|GO:0005886|GO:0005887|GO:0005902|GO:0005903|GO:0009986|GO:0016324		chr4	15578982	15579031	TCCAGATGTAGGCATTCCCCCCAGGTCTTTTCATGTGCAGATTGCAGTTC
EMP1	3940435	0.0160388	up	3.25514	-3.42644	-1.72372	2012	Homo sapiens epithelial membrane protein 1 (EMP1), mRNA.	GO:0007275|GO:0008283|GO:0008544|GO:0016049	GO:0005624|GO:0016020|GO:0016021		chr12	13260606	13260655	GAGGGCAAGCCACCAAATTACCTAGGCTGAGGTTAGAGAGATTGGCCAGC
THBS1	5810685	0.0141823	up	3.34821	-3.51043	-1.76704	7057	Homo sapiens thrombospondin 1 (THBS1), mRNA.	GO:0006954|GO:0016525|GO:0007155|GO:0007275	GO:0005615|GO:0005576|GO:0005576|GO:0031093	GO:0004866|GO:0004871|GO:0005198|GO:0005509|GO:0005515|GO:0008201	chr15	37676117	37676166	CAGTCTAATAAGCTGCTCTGCCCCTTGTGCTCAGAGTGGATGTTATGGGA
ESRRG	5080136	0.0228429	up	3.39919	2.47546	4.24065	2104	Homo sapiens estrogen-related receptor gamma (ESRRG), transcript variant 2, mRNA.	GO:0006350|GO:0045893	GO:0005634	GO:0003700|GO:0003707|GO:0005496|GO:0005515|GO:0008270|GO:0016563|GO:0043565|GO:0046872|GO:0050682	chr1	216676733	216676782	GTGATGTGTACCATACTGTGTGCTCCAGCAAATGTCCATTTGTGTAAATG
ALPK2	5270519	0.00764478	up	3.42101	-6.17357	-4.39915	115701	Homo sapiens alpha-kinase 2 (ALPK2), mRNA.	GO:0006468		GO:0004674|GO:0005524|GO:0016301|GO:0016740	chr18	56148547	56148596	CCACTGGTGTCTAATACGCTATTGTTGCCGGAGGTGGGTTCTGTGACGTG
RGS5	4670082	0.00768846	up	3.52066	0.429993	2.24584	8490	Homo sapiens regulator of G-protein signaling 5 (RGS5), mRNA.	GO:0008277|GO:0009968	GO:0005737|GO:0005737	GO:0004871|GO:0005096|GO:0004871	chr1	163112291	163112340	ATGTTGCAACTAGCAACTCATCTTCGGAAGACACAGCCAGGAGAATGAAG
ONECUT2	6350192	0.0153898	up	3.58622	2.06939	3.91185	9480	Homo sapiens one cut homeobox 2 (ONECUT2), mRNA.	GO:0006355|GO:0009887	GO:0005634	GO:0003700|GO:0003702|GO:0043565	chr18	53304498	53304547	CCTGTGAATACCTCAGCTTCAACTGGGCCTCCATACAGTCAGTTGGTGGG
STXBP6	3400379	0.0167887	up	3.6158	-0.775656	1.07866	29091	Homo sapiens syntaxin binding protein 6 (amisyn) (STXBP6), mRNA.	GO:0016192	GO:0005737|GO:0016020|GO:0016021		chr14	25281307	25281356	GATTTTGCTCCTTGCATAGTAATCTTTTGCATGAACCATCACCAGCGTTC
A2M	2370438	0.00768846	up	3.7537	1.94399	3.85231	2	Homo sapiens alpha-2-macroglobulin (A2M), mRNA.	GO:0051260	GO:0005576|GO:0005576|GO:0005634|GO:0005737|GO:0031093	GO:0004867|GO:0017114|GO:0019899|GO:0019959|GO:0019966|GO:0043120	chr12	9220383	9220432	CTTGGAAATGCTTGAAGACCACAAGGCTGAAAAGTGCTTTGCTGGAGTCC
EGFLAM	6270372	0.00362396	up	3.76728	-0.509209	1.40431	133584	Homo sapiens EGF-like, fibronectin type III and laminin G domains (EGFLAM), transcript variant 4, mRNA.		GO:0005576		chr5	38464555	38464604	GGCCCTTGGATTGTTCGGATTAACCCCTTCCACTCCTCACTGGCTGGTTC
CBLN2	620685	0.0117334	up	3.83112	2.59545	4.53321	147381	Homo sapiens cerebellin 2 precursor (CBLN2), mRNA.		GO:0016020|GO:0016021		chr18	68355193	68355242	TCCGGATCCTCTTTTGATCTGCCCAGGAAAGGGATGCATTGACACTCTCC
CTGF	2640292	0.0107609	up	3.83347	-1.96107	-0.0224167	1490	Homo sapiens connective tissue growth factor (CTGF), mRNA.	GO:0001502|GO:0001503|GO:0001525|GO:0001558|GO:0006260|GO:0007155|GO:0007160|GO:0007229|GO:0008543|GO:0008544|GO:0009611|GO:0016477|GO:0030154	GO:0005576|GO:0005578|GO:0005886	GO:0005178|GO:0005515|GO:0005520|GO:0008201	chr6	132311214	132311263	TTGCAAAGGGGAGGCATCAGTGTCCTTGGCAGGCTGATTTCTAGGTAGGA
MAB21L2	4040731	0.0153913	up	3.97573	3.87623	5.86745	10586	PREDICTED: Homo sapiens mab-21-like 2 (C. elegans) (MAB21L2), mRNA.	GO:0007275|GO:0007399|GO:0008284|GO:0010172|GO:0043010	GO:0005634					GTGCCAATGTCAGACTGTGCTCCTCCCTCTCCTGAACCTCTACCCTCACC
KIAA1199	110181	0.00851102	up	3.99345	-7.39695	-5.39932	57214	Homo sapiens KIAA1199 (KIAA1199), mRNA.	GO:0007605			chr15	79030856	79030905	GCAACGCTCCTCTGAAATGCTTGTCTTTTTTCTGTTGCCGAAATAGCTGG
PTRF	4850301	0.00874808	up	4.10876	-3.5693	-1.5306	284119	Homo sapiens polymerase I and transcript release factor (PTRF), mRNA.	GO:0006350|GO:0006353|GO:0006355|GO:0006361	GO:0005634|GO:0005654|GO:0005737|GO:0005739|GO:0005783|GO:0005792|GO:0005886|GO:0005901	GO:0003716|GO:0003716|GO:0005515|GO:0042134|GO:0042134	chr17	37808068	37808117	CTTGGTGCTGATGGCCTGAAGGGGCCTGAGCTGTGGGCAGATGCAGTTTT
CYR61	3930605	0.0107609	up	4.24428	-2.43933	-0.35381	3491	Homo sapiens cysteine-rich, angiogenic inducer, 61 (CYR61), mRNA.	GO:0001558|GO:0001558|GO:0001569|GO:0006935|GO:0007155|GO:0008283|GO:0009653	GO:0005576|GO:0005576	GO:0005520|GO:0005520|GO:0008201	chr1	85821467	85821516	GAAACTGCCAAGGGTGCTGGTGCGGATGGACACTAATGCAGCCACGATTG
KCTD8	1980079	0.0112386	up	4.51485	1.02626	3.20094	386617	Homo sapiens potassium channel tetramerisation domain containing 8 (KCTD8), mRNA.	GO:0006813	GO:0008076|GO:0016020	GO:0005249|GO:0005515	chr4	43871434	43871483	GGTCAGTGTGATTCTTGCTGCTCTTCCTTGTTGTGAACAGTGGATGTGGG
RGS5	160445	0.00768846	up	4.57521	0.268519	2.46236	8490	Homo sapiens regulator of G-protein signaling 5 (RGS5), mRNA.	GO:0008277|GO:0009968	GO:0005737|GO:0005737	GO:0004871|GO:0005096|GO:0004871	chr1	163112778	163112827	CCTGGCTTTGAATGGAAACTTACAGCAGAGAGTCACAGGCCACGGCAACA
PMP22	4280047	0.0031005	up	5.17294	-0.0644012	2.30658	5376	Homo sapiens peripheral myelin protein 22 (PMP22), transcript variant 1, mRNA.	GO:0007268|GO:0007422|GO:0007605|GO:0007638|GO:0032288	GO:0016020|GO:0016021|GO:0016020|GO:0016021		chr17	15168508	15168557	GCCCTGTGGGGAGGGTCTTGCCTTAACATCCCTTGCATTTGGCTGCAAAG
CHODL	460544	0.0121768	up	6.49834	2.12334	4.82341	140578	Homo sapiens chondrolectin (CHODL), mRNA.	GO:0007517	GO:0016020|GO:0016021|GO:0048471	GO:0005488|GO:0005529|GO:0005540	chr21	18561148	18561197	CAAAGATGGTTGTTCGGGGTTTGGGATTGACACTGGAGGCAGATAGTTGC
CHX10	3890020	0.0113701	up	6.96425	1.22526	4.02523	338917	Homo sapiens ceh-10 homeodomain containing homolog (C. elegans) (CHX10), mRNA.				chr14	73798972	73799021	TCCCTCCCCCTAGTCCGGTTCTTCTTGTCTTTGTCCCTGTTGGTTTGAAG
